# Supplementary material
Source: PubMed Central journal article supplement (PMC4350024)

# N-glycoproteomics of urinary exosomes.

*Mayank Saraswat<sup>1,\*</sup>, Sakari Joenväära<sup>2,\*</sup>, Luca Musante<sup>3</sup>, Hannu Peltoniemi<sup>4</sup>, Harry Holthofer<sup>3</sup>, Risto Renkonen<sup>1,2,\$</sup>*

## SUPPLEMENTS

All the supplementary data is given here except supplementary Table 3 and 4 which are given as separate files.

Page 2: Supplementary methods.

Page 3: Supplementary Figure 1.

Page 3: Supplementary Figure 2.

Page 4: Supplementary Figure 3.

Page 5: Supplementary Figure 4.

Page 6: Supplementary Figure 5.

Page 6: Supplementary Table 1.

Page 7-10: MALDI parameters

Page 11: Supplementary Table 2. Optimal viewing conditions for this table are 100% zoom.

Page 12 onwards: Annotated spectra of all the glycopeptides which can be differentiated based on the m/z value. M/z value and charge of the precursor ion can be found on the top left corner of each spectra. These m/z values can be found as the name of the sheet in supplementary Table 3 (supplied separately) which is annotation of the fragment ions from every spectra (Glycan assignment).

## **Supplemental methods**

### **Negative transmission electron microscopy**

50 µg of urinary exosomes (P 200,000 g) were fixed with glutaraldehyde (1% (v/v), Sigma Aldrich) in water and spotted onto a Formvar/Carbon 300 mesh grid (Agar Scientific, Stansted, UK). The grids were dried at RT and washed twice in 0.1 M PBS. Thereafter the grids were incubated with 1% (w/v) OsO<sub>4</sub> in 0.1 M PBS for 30 min at +4°C. After three washes with PBS and two with water (five minutes each), exosomes were stained with 5% (w/v) uranyl acetate in water for 10 min. After staining, vesicle populations were imaged by JEM-2100 transmission electron microscopy (Jeol Ltd, Tokyo, Japan).

### **Protein quantification, SDS-PAGE and Western blotting**

The protein concentrations in all urine fractions were measured by Coomassie Protein Assay (1). SDS-PAGE was carried out according to Laemmli (2). The gels were blotted to nitrocellulose membrane. The membranes were blocked overnight at RT with the Odyssey blocking buffer solution (LI-COR Biosciences, Lincoln, NE, USA). All incubation steps with antibodies were performed in a 1:1 (v/v) mixture of Odyssey blocking buffer and PBS with 0.1 % (v/v) Tween 20 (PBST). Antibodies were diluted in accordance with supplier's guidelines (anti-TSG101, Sigma, St. Louis, MO). Images were acquired by Odyssey Infrared Laser Scanner (LI-COR Biosciences, Lincoln, NE).

#### References:

1. Bradford, M. M. (1976) A rapid and sensitive method for the quantitation of microgram quantities of protein utilizing the principle of protein-dye binding. *Analytical biochemistry* 72, 248-254
2. Laemmli, U. K. (1970) Cleavage of structural proteins during the assembly of the head of bacteriophage T4. *Nature* 227, 680-685

**Supplemental Figures:**

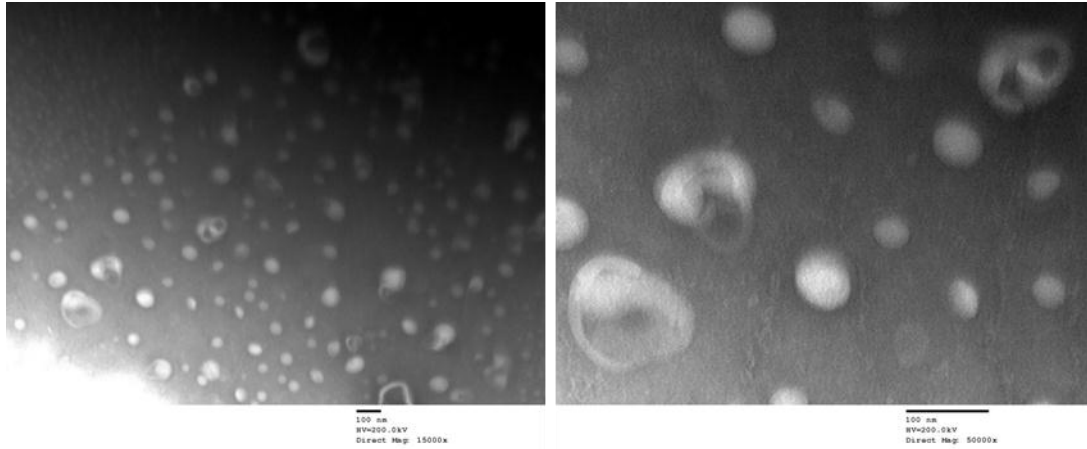

Supplemental Figure 1: Transmission electron microscopy pictures of exosomal fractions (P200,000g) at various magnifications. Panel on the left has direct magnification of 15,000 x and the panel on the right has 50,000 x. The bar shown below the picture is 100 nm in both the panels.

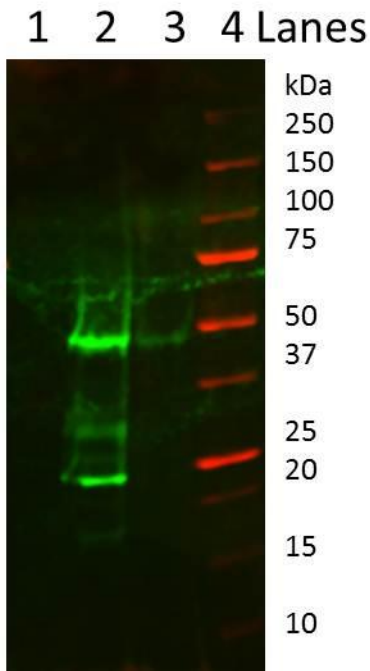

Supplementary Figure 2: Western blotting of urine fractions using anti-TSG101 antibody. Lanes 1: SN 200,000 g, 2: P 200,000 g, 3: P 18,000 g, 4: Molecular weight markers. Antibody dilutions were 1:1000 in Odyssey blocking buffer: PBS (1:1). The expected molecular weight of TSG101 is ~50 kDa.

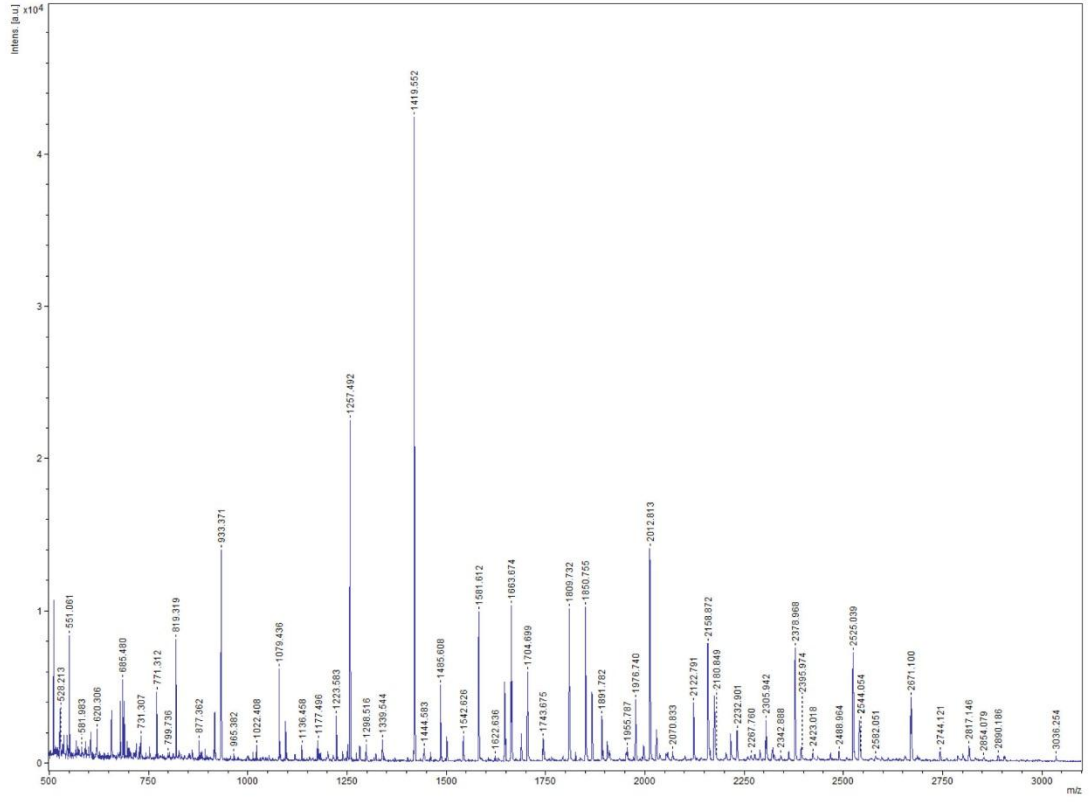

Supplementary Figure 3 MALDI spectrum of neutral N-glycans. X-axis is the m/z value and Y-axis is the relative intensity.

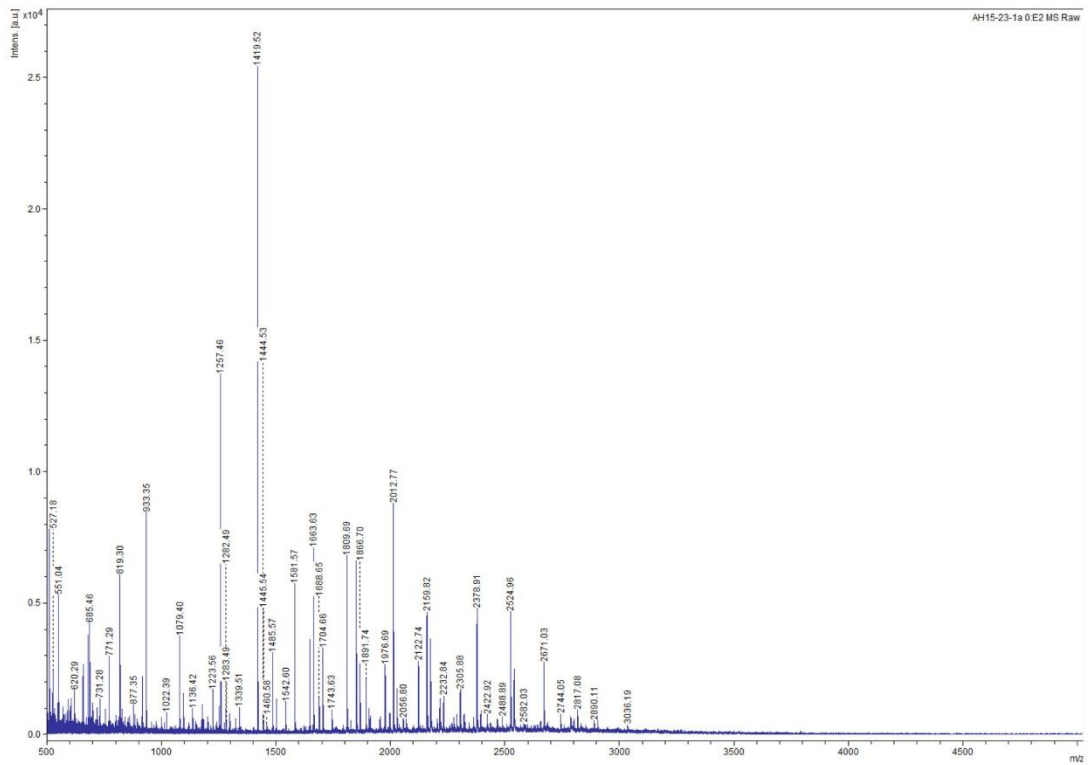

Supplementary figure 4: MALDI spectrum of total (Neutral and acidic) N-glycans. X-axis is the m/z value and Y-axis is the relative intensity.

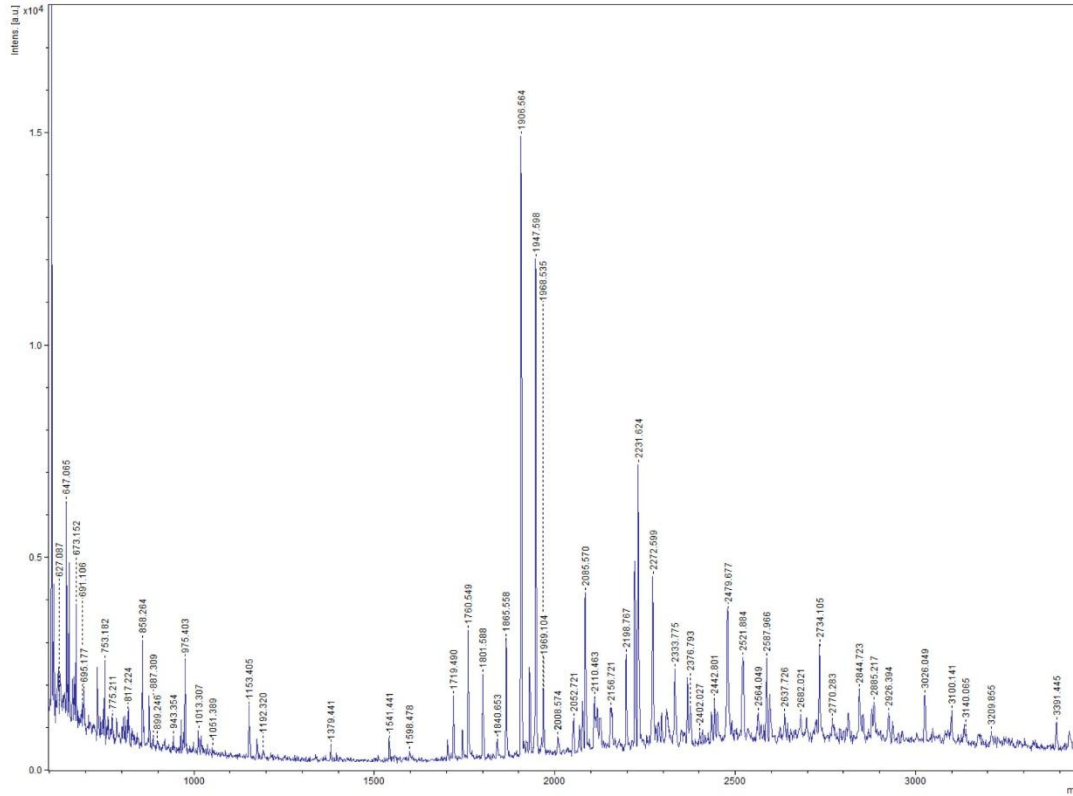

Supplementary figure 5: MALDI spectrum of acidic N-glycans. X-axis is the m/z value and Y-axis is the relative intensity.

**Supplemental table 1:**

Supplementary Table 1: Combur<sup>10</sup> test values for volunteers A, B and C.

| Parameters/Volunteers | A        | B        | C        |
|-----------------------|----------|----------|----------|
| Specific gravity      | 1.015    | 1.020    | 1.020    |
| pH                    | 6        | 5        | 6        |
| Leukocytes            | Negative | Negative | Negative |
| Nitrite               | Negative | Negative | Negative |
| Protein               | Negative | Negative | Negative |
| Glucose               | Normal   | Normal   | Normal   |
| Ketones               | Negative | Negative | Negative |
| Urobilinogen          | Negative | Negative | Negative |
| Bilirubin             | Negative | Negative | Negative |
| Erythrocytes          | Negative | Negative | Negative |

**(Neutral spectra)** Below are all the parameters used for the analysis of neutral glycans.

File name: X:\MALDI\Annari\AH15-kirja\AH15-23\AH15-23-1-1\0\_F2\1

Date: 2014-09-19 13:27:09

User name: Ultraflex3

Method: D:\Methods\flexControlMethods\RePo.par

Sample: AH15-23-1-1\0\_F2\1

Delay: 40907 ns

HiTurbo: false

Realtime smooth: off

RepRate: 100 Hz

SampleRate: 0.5 ns

SpecSize: 176185 pts

Uhimass: 0 kV

ULinDet: 1.653 kV

URefDet: 1.737 kV

Analog Offset: 51.8 mV

Electronic Gain: 100 mV/fullscale

Laser Focus: 27

DPCal: 0

Matrix suppression: deflection

Matrix suppression

cut-off mass: 450

PIEDelay: 60 ns  
Polarity: POS  
UIS1: 18 kV  
UIS2: 15.8 kV  
ULens: 7.9 kV  
URef1: 19 kV  
URef2: 9.99 kV

Processing Calibration:

c0: 195.123  
c1: 300576.138  
c2: -0.117  
CalDate: 2014-09-19T13:21:18.000+00:00  
CalRef:  
HPCUse: false  
Mass error: 0.913  
MClst: Sugar\_neutral



**(Acidic spectra)** Below are all the parameters used for the analysis of acidic glycans.

File name: X:\MALDI\Annari\AH15-kirja\AH15-23\Happamat\Uusinta\AH15-23-1-2\0\_I1\1  
Date: 2014-10-03 14:44:23  
Instrument: GLYD054  
User name: Ultraflex3  
Method: D:\Methods\flexControlMethods\Puolikkaat\ReNe12kV.par  
Sample: AH15-23-1-2\0\_I1\1

Delay: 55205 ns  
HiTurbo: false  
Realtime smooth: off  
RepRate: 100 Hz  
SampleRate: 0.5 ns  
SpecSize: 153872 pts  
Uhimass: 0 kV  
ULinDet: 1.653 kV  
URefDet: 1.819 kV

Analog Offset: 53 mV  
Electronic Gain: 100 mV/fullscale  
Laser Focus: 27  
DPCal: 0  
Matrix suppression: deflection

### Matrix suppression

|               |          |
|---------------|----------|
| cut-off mass: | 500      |
| PIEDelay:     | 20 ns    |
| Polarity:     | NEG      |
| UIS1:         | 12 kV    |
| UIS2:         | 10.44 kV |
| ULens:        | 4.7 kV   |
| URef1:        | 12.5 kV  |
| URef2:        | 6.69 kV  |

### Processing Calibration:

|             |                               |
|-------------|-------------------------------|
| c0:         | 195.184                       |
| c1:         | 197635.438                    |
| c2:         | -0.146                        |
| CalDate:    | 2014-10-03T14:42:08.000+00:00 |
| CalRef:     |                               |
| HPCUse:     | false                         |
| Mass error: | 2.911                         |
| MClst:      | Sugar                         |

Supplementary table 2: all the glycopeptides sequences, glycan composition and structure are given in this table along with other parameters. The false positive rate calculated was 2.56%.

| mz       | charge | SNA/SEC | protein     | peptide_mass | start | end  | N_site | N_site_DB | sequence                       | score_peptide | composition | structure_matching_to_Glycome_DB | GlycomeDB ID/ De novo composition | ppm       | score_glycan | rank_all | score_all |
|----------|--------|---------|-------------|--------------|-------|------|--------|-----------|--------------------------------|---------------|-------------|----------------------------------|-----------------------------------|-----------|--------------|----------|-----------|
| 1170,737 | 4      | SEC     | A1AG1_HUMAN | 2894,449     | 58    | 81   | 72     | 72        | SVEQIQATFFYFPTNKTEDTIFLR       | 17,09         | H6N4        |                                  | denovo                            | 35,55027  | 9,94         | 1        | 27,03     |
| 927,0483 | 3      | SEC     | AMN1_HUMAN  | 758,4286     | 90    | 96   | 93     |           | LNLNASK                        | 18,52         | H6N3F3      |                                  | denovo                            | 12,30069  | 4,75         | 1        | 23,27     |
| 982,7845 | 3      | SEC     | AMPN_HUMAN  | 1281,7081    | 231   | 241  | 234    | 234       | AEFNITLHPK                     | 36,83         | H4N5        | HNH(NH)(N)HNN                    | 1033                              | -5,21986  | 30,72        | 1        | 67,55     |
| 950,6725 | 4      | SEC     | AMPN_HUMAN  | 1315,6997    | 126   | 136  | 128    | 128       | KLNYLTSQGHK                    | 21,27         | H6N6F2      |                                  | denovo                            | -13,7324  | 29,69        | 1        | 50,96     |
| 1139,474 | 4      | SEC     | AMPN_HUMAN  | 2876,3635    | 40    | 69   | 42     |           | NANSSPVASTTTPASATNPPASATLDDQSK | 17,69         | S2H3N3      |                                  | denovo                            | 18,51293  | 18,55        | 1        | 36,24     |
| 1269,308 | 4      | SNA     | APOD_HUMAN  | 2722,402     | 83    | 108  | 98     | 98        | ADGTVNQIEGATPVNLTPEAKLEVK      | 23,15         | S2H5N4F1    | SHNH(SHNH)HN(F)N                 | 216                               | 5,786618  | 59,99        | 1        | 83,14     |
| 1098,147 | 3      | SEC     | APOD_HUMAN  | 2253,112     | 83    | 104  | 98     | 98        | ADGTVNQIEGATPVNLTPEAK          | 40,76         | H3N2F1      |                                  | denovo                            | 20,61351  | 28,31        | 1        | 69,07     |
| 1097,932 | 4      | SEC     | APOD_HUMAN  | 1526,698     | 61    | 73   | 65     | 65        | CIQANYSMLMENGK                 | 33,3          | S3H6N5      | SHNH(SHN(SHN)H)HNN               | 1255                              | -0,57381  | 31,81        | 1        | 65,11     |
| 1244,821 | 3      | SEC     | APOD_HUMAN  | 1526,698     | 61    | 73   | 65     | 65        | CIQANYSMLMENGK                 | 22,45         | S2H5N4      | SHNH(SHNH)HNN                    | 855                               | 8,143074  | 30,49        | 1        | 52,94     |
| 933,8698 | 4      | SEC     | APOD_HUMAN  | 1526,698     | 61    | 73   | 65     | 65        | CIQANYSMLMENGK                 | 27,19         | S2H5N4      | SHNH(SHNH)HNN                    | 855                               | 5,429022  | 20,12        | 1        | 47,31     |
| 896,3768 | 3      | SEC     | ASAH1_HUMAN | 1469,6885    | 255   | 267  | 259    | 259       | TVLENSTSYEEAK                  | 45,84         | H5N2        | H(H)H(H)HNN                      | 234                               | 1,007761  | 32,8         | 1        | 78,64     |
| 950,3925 | 3      | SEC     | ASAH1_HUMAN | 1469,6885    | 255   | 267  | 259    | 259       | TVLENSTSYEEAK                  | 43            | H6N2        | HHH(H)H(H)HNN                    | 235                               | 2,949659  | 35,5         | 1        | 78,5      |
| 1004,411 | 3      | SEC     | ASAH1_HUMAN | 1469,6885    | 255   | 267  | 259    | 259       | TVLENSTSYEEAK                  | 40,12         | H7N2        | HHH(H)H(H)HNN                    | 240                               | 1,795414  | 34,46        | 1        | 74,58     |
| 842,3589 | 3      | SEC     | ASAH1_HUMAN | 1469,6885    | 255   | 267  | 259    | 259       | TVLENSTSYEEAK                  | 34,34         | H4N2        | HH(H)H(H)HNN                     | 5746                              | 1,428528  | 18,03        | 1        | 52,37     |
| 1007,75  | 3      | SEC     | ATRN_HUMAN  | 1317,6524    | 411   | 422  | 416    | 416       | IDSTGNVTNELR                   | 35,68         | H8N2        | HHH(H)H(H)HNN                    | 242                               | 1,690234  | 40,87        | 1        | 76,55     |
| 899,7146 | 3      | SEC     | ATRN_HUMAN  | 1317,6524    | 411   | 422  | 416    | 416       | IDSTGNVTNELR                   | 41,24         | H8N2        | HHH(H)H(H)HNN                    | 235                               | 2,226632  | 33,42        | 1        | 74,66     |
| 953,7311 | 3      | SEC     | ATRN_HUMAN  | 1317,6524    | 411   | 422  | 416    | 416       | IDSTGNVTNELR                   | 32,8          | H7N2        | HHH(H)H(H)HNN                    | 240                               | 3,253887  | 39,88        | 1        | 72,38     |
| 845,6984 | 3      | SEC     | ATRN_HUMAN  | 1317,6524    | 411   | 422  | 416    | 416       | IDSTGNVTNELR                   | 32,63         | H5N2        | HH(H)H(H)HNN                     | 234                               | 0,713414  | 32,56        | 1        | 65,17     |
| 1074,46  | 3      | SEC     | BGAL_HUMAN  | 1185,6717    | 458   | 468  | 464    | 464       | NNVTILNITK                     | 25,93         | S1H7N3      |                                  | denovo                            | 4,997858  | 36,15        | 1        | 62,43     |
| 830,368  | 3      | SEC     | BGLR_HUMAN  | 1271,683     | 269   | 281  | 272    | 272       | VVANGTGTGGQLK                  | 26,56         | H5N2        | H(H)H(H)HNN                      | 240                               | 9,477726  | 22,21        | 1        | 48,77     |
| 1083,699 | 4      | SEC     | CFRU_HUMAN  | 2125,9916    | 396   | 415  | 397    | 397       | ENLTAGSDSVAFFVGGQTR            | 28,97         | S2H5N4      | SHNH(SHNH)HNN                    | 855                               | -0,67362  | 35,07        | 1        | 64,04     |
| 1025,18  | 4      | SNA     | CEFL_HUMAN  | 1891,8337    | 129   | 144  | 138    | 138       | EHEGAYPPDNTDFQR                | 23,62         | S2H5N4      | SHNH(SHNH)HNN                    | 855                               | -20,6842  | 31,21        | 1        | 54,83     |
| 957,1561 | 4      | SEC     | CLUS_HUMAN  | 1682,8264    | 372   | 385  | 374    | 374       | LANLTQGEDQYYLR                 | 34,53         | S1H2N6F1    | SNNH(NNH)HN(F)N                  | 8842                              | 5,009632  | 41,83        | 1        | 76,36     |
| 1019,677 | 4      | SEC     | CLUS_HUMAN  | 1682,8264    | 372   | 385  | 374    | 374       | LANLTQGEDQYYLR                 | 22,21         | S2H4N5F1    | SNNH(SHNH)HN(F)N                 | 8844                              | 0,975799  | 29,72        | 1        | 51,93     |
| 1103,789 | 3      | SNA     | COA4_HUMAN  | 1103,593     | 1326  | 1336 | 1328   | 1328      | GLNVTLSSTR                     | 18,54         | S2H5N4      | SHNH(SHNH)HNN                    | 855                               | 6,10322   | 52,06        | 1        | 70,6      |
| 1125,47  | 3      | SEC     | CUBN_HUMAN  | 1109,5578    | 1800  | 1810 | 1802   | 1802      | EGNATGHLVGR                    | 23,47         | H5N5F3      | FHNH(FHNH)HN(F)N                 | 2023                              | 1,187652  | 76           | 1        | 99,47     |
| 1076,783 | 3      | SEC     | CUBN_HUMAN  | 1109,5578    | 1800  | 1810 | 1802   | 1802      | EGNATGHLVGR                    | 25,93         | H5N5F2      | FHNH(HNH)HN(F)N                  | 24655                             | 2,572478  | 66,4         | 1        | 92,33     |
| 1121,468 | 3      | SEC     | CUBN_HUMAN  | 1186,5942    | 3457  | 3468 | 3457   | 3457      | NGSNSNPLLGK                    | 30,47         | H5N6F1      |                                  | denovo                            | 3,242774  | 57,56        | 1        | 88,03     |
| 984,0692 | 3      | SEC     | CUBN_HUMAN  | 977,4719     | 2082  | 2090 | 2085   | 2085      | AGFNASFHK                      | 27,67         | H5N5F1      | HNH(F)H(NH)HNN                   | 5782                              | 1,697035  | 52,27        | 1        | 79,94     |
| 1053,11  | 3      | SEC     | CUBN_HUMAN  | 1184,6098    | 778   | 788  | 781    | 781       | VCNGTSTSHK                     | 18,45         | H5N5F1      | FHNH(FHNH)HN(F)N                 | 1043                              | 6,491883  | 59,02        | 1        | 77,47     |
| 897,0562 | 3      | SEC     | CUBN_HUMAN  | 1186,5942    | 3457  | 3468 | 3457   | 3457      | NGSNSNPLLGK                    | 35,37         | H3N5        | NH(NH)HN(NH)N                    | 1032                              | 1,044156  | 51,92        | 1        | 77,29     |
| 1278,194 | 3      | SEC     | CUBN_HUMAN  | 1348,6782    | 2526  | 2537 | 2531   | 2531      | LCSSVNVSEIK                    | 25,65         | H6N6F2      |                                  | denovo                            | 7,356736  | 40,94        | 1        | 76,59     |
| 916,3778 | 3      | SEC     | CUBN_HUMAN  | 977,4719     | 2082  | 2090 | 2085   | 2085      | AGFNASFHK                      | 30,49         | H5N4F1      | HNH(H)H(NH)HNN                   | 887                               | -0,06911  | 44,26        | 1        | 74,75     |
| 951,073  | 3      | SEC     | CUBN_HUMAN  | 1186,5942    | 3457  | 3468 | 3457   | 3457      | NGSNSNPLLGK                    | 35,5          | H4N5        | HNH(NH)HN(F)N                    | 1033                              | 1,826008  | 38,98        | 1        | 74,48     |
| 999,7589 | 3      | SEC     | CUBN_HUMAN  | 1186,5942    | 3457  | 3468 | 3457   | 3457      | NGSNSNPLLGK                    | 32,72         | H4N5F1      |                                  | denovo                            | 1,803768  | 41,13        | 1        | 73,85     |
| 937,3969 | 3      | SEC     | CUBN_HUMAN  | 1186,5942    | 3457  | 3468 | 3457   | 3457      | NGSNSNPLLGK                    | 35,48         | H5N4        |                                  | denovo                            | 2,457159  | 33,38        | 1        | 68,86     |
| 1107,791 | 3      | SEC     | CUBN_HUMAN  | 1186,5942    | 3457  | 3468 | 3457   | 3457      | NGSNSNPLLGK                    | 30,32         | H6N5F1      | HNH(NH)H(NH)HNN                  | 32456                             | 4,516469  | 37,7         | 1        | 68,02     |
| 844,3534 | 4      | SEC     | CUBN_HUMAN  | 1109,5578    | 1800  | 1810 | 1802   | 1802      | EGNATGHLVGR                    | 23,46         | H5N5F3      | FHNH(FHNH)HN(F)N                 | 24641                             | 2,362755  | 42,83        | 1        | 66,29     |
| 1107,802 | 3      | SEC     | CUBN_HUMAN  | 1348,6782    | 2526  | 2537 | 2531   | 2531      | LCSSVNVSEIK                    | 25,25         | H5N5F1      | HNH(H)H(NH)HNN                   | 1043                              | 4,335915  | 40,47        | 1        | 65,72     |
| 935,3835 | 3      | SEC     | CUBN_HUMAN  | 977,4719     | 2082  | 2090 | 2085   | 2085      | AGFNASFHK                      | 27,59         | H5N5        | HNH(H)H(NH)HNN                   | 1035                              | 1,500276  | 37,05        | 1        | 64,64     |
| 1229,506 | 3      | SEC     | CUBN_HUMAN  | 1348,6782    | 2526  | 2537 | 2531   | 2531      | LCSSVNVSEIK                    | 18,26         | H6N6F1      | HNH(H)H(NH)HN(F)N                | 17650                             | 8,813837  | 46,18        | 1        | 64,44     |
| 1326,878 | 3      | SEC     | CUBN_HUMAN  | 1348,6782    | 2526  | 2537 | 2531   | 2531      | LCSSVNVSEIK                    | 18,41         | H6N6F3      |                                  | denovo                            | 7,966065  | 44,75        | 1        | 63,16     |
| 1105,785 | 3      | SEC     | CUBN_HUMAN  | 977,4719     | 2082  | 2090 | 2085   | 2085      | AGFNASFHK                      | 19,79         | H6N6F1      | HNH(H)H(NH)HN(F)N                | 17650                             | -2,98129  | 40,82        | 1        | 60,61     |
| 1180,824 | 3      | SEC     | CUBN_HUMAN  | 1348,6782    | 2526  | 2537 | 2531   | 2531      | LCSSVNVSEIK                    | 20,38         | H6N6        | HNH(H)H(NH)HN(F)N                | 5374                              | 6,41078   | 34,43        | 1        | 54,81     |
| 1218,502 | 3      | SEC     | CUBN_HUMAN  | 1186,5942    | 3457  | 3468 | 3457   | 3457      | NGSNSNPLLGK                    | 18,23         | S1H5N6F1    |                                  | denovo                            | 1,261112  | 36,46        | 1        | 54,69     |
| 1053,773 | 3      | SEC     | CUBN_HUMAN  | 1186,5942    | 3457  | 3468 | 3457   | 3457      | NGSNSNPLLGK                    | 22,63         | H5N5F1      | HNH(F)H(NH)HNN                   | 5782                              | 5,507198  | 31,95        | 1        | 54,58     |
| 1067,45  | 3      | SEC     | CUBN_HUMAN  | 1186,5942    | 3457  | 3468 | 3457   | 3457      | NGSNSNPLLGK                    | 22,63         | H4N6F1      | NNH(H)H(NH)HN(F)N                | 1492                              | 3,500554  | 31,81        | 1        | 54,44     |
| 958,8961 | 4      | SEC     | CUBN_HUMAN  | 1348,6782    | 2526  | 2537 | 2531   | 2531      | LCSSVNVSEIK                    | 27,81         | H6N6F2      |                                  | denovo                            | 8,311641  | 26,3         | 1        | 54,11     |
| 995,4046 | 4      | SEC     | CUBN_HUMAN  | 1348,6782    | 2526  | 2537 | 2531   | 2531      | LCSSVNVSEIK                    | 25,36         | H6N6F3      |                                  | denovo                            | 14,00938  | 23,74        | 1        | 49,1      |
| 918,1528 | 4      | SEC     | DPEP1_HUMAN | 1550,8416    | 56    | 70   | 57     | 57        | ANLTLTAGTHTNPK                 | 16,94         | H5N5F2      | FHNH(HNH)HN(F)N                  | 24655                             | 9,87853   | 23,59        | 1        | 40,53     |
| 994,9092 | 4      | SEC     | FETUA_HUMAN | 1770,864     | 145   | 159  | 156    | 156       | VCQDCFLAPLNDTR                 | 21,68         | S2H5N4      | SHNH(SHNH)HNN                    | 855                               | 7,206688  | 27,48        | 1        | 49,16     |
| 917,7096 | 3      | SEC     | FGFR3_HUMAN | 877,4141     | 311   | 319  | 315    | 315       | TAGANTTDK                      | 17,04         | S1H6N3      |                                  | denovo                            | -15,4334  | 16,19        | 1        | 33,23     |
| 898,7083 | 3      | SEC     | FGFR3_HUMAN | 877,4141     | 311   | 319  | 315    | 315       | TAGANTTDK                      | 17,02         | S1H6N2F1    |                                  | denovo                            | -22,2875  | 13,69        | 1        | 30,71     |
| 1139,238 | 4      | SEC     | GGTL1_HUMAN | 1632,895     | 160   | 173  | 167    | 167       | LHNQLLPVNTTVER                 | 22,58         | S1H6N6F3    |                                  | denovo                            | 7,368959  | 33,92        | 1        | 56,5      |
| 903,112  | 4      | SEC     | HEMO_HUMAN  | 1403,674     | 181   | 193  | 187    | 187       | SWPAVNGCSSALR                  | 17,6          | S2H5N4      | SHNH(SHNH)HNN                    | 855                               | 7,60703   | 19,98        | 1        | 37,58     |
| 1220,08  | 4      | SNA     | IghA1_HUMAN | 2962,604     | 127   | 153  | 144    | 144       | LSLRPALEDLLGSEANLCTLTGLR       | 40,46         | S1H5N4      | SHNH(SHNH)HNN                    | 205                               | -2,03265  | 48,59        | 1        | 89,05     |
| 923,4094 | 3      | SEC     | IghA2_HUMAN | 957,5495     | 200   | 208  | 205    | 205       | TPLTANITK                      | 36,77         | H4N5F1      | HNH(H)H(NH)HN(F)N                | 1041                              | 3,324636  | 43,16        | 1        | 79,93     |
| 1006,767 | 3      | SEC     | IghA2_HUMAN | 957,5495     | 200   | 208  | 205    | 205       | TPLTANITK                      | 30,58         | S1H5N4F1    | SHNH(HNH)HN(F)N                  | 215                               | 1,724994  | 45,2         | 1        | 75,78     |
| 977,4273 | 3      | SEC     | IghA2_HUMAN | 957,5495     | 200   | 208  | 205    | 205       | TPLTANITK                      | 30,55         | H5N5F1      | HNH(H)H(NH)HN(F)N                | 1043                              | 2,83397   | 44,49        | 1        | 75,04     |
| 1074,478 | 3      | SNA     | IghA2_HUMAN | 957,5495     | 200   | 208  | 205    | 205       | TPLTANITK                      | 25,04         | S1H5N5F1    | SHNH(HNH)HN(F)N                  | 4685                              | -15,01197 | 44,64        | 1        | 69,68     |
| 806,0957 | 4      | SEC     | IghA2_HUMAN | 957,5495     | 200   | 208  | 205    | 205       | TPLTANITK                      | 27,86         | S1H5N5F1    | SHNH(HNH)HN(F)N                  | 4685                              | 3,12618   | 21,77        | 1        | 49,63     |
| 922,0402 | 3      | SEC     | IGHG2_HUMAN | 1156,515     | 172   | 180  | 176    | 176       | EEQFNSTR                       | 27,55         | H4N4F1      | HNH(H)H(NH)HNN                   | 1026                              | 1,052015  | 49,42        | 1        | 76,97     |

# m/z 984.784 charge 3 scan 0-0

Score= 74.85 , Hits= 40 , Explained Intensity= 0.49

Peptide: LYAG\_HUMAN[465,479]:GVFITNETGQPLIGK

Glycan: HH(H(H)H)HNN, H6N2

Charge: 3H

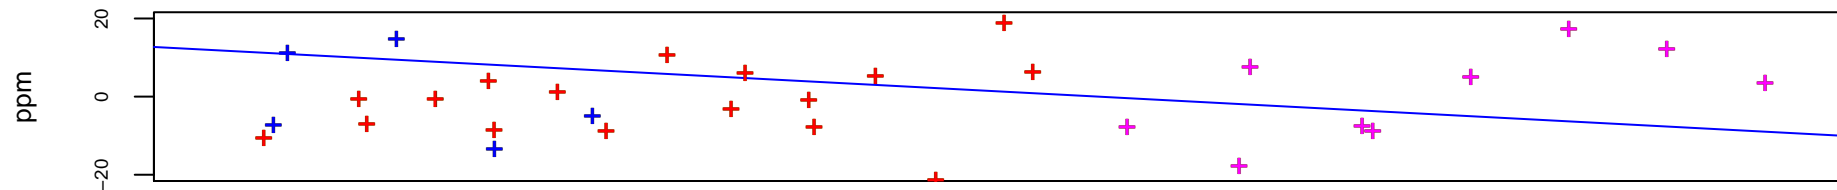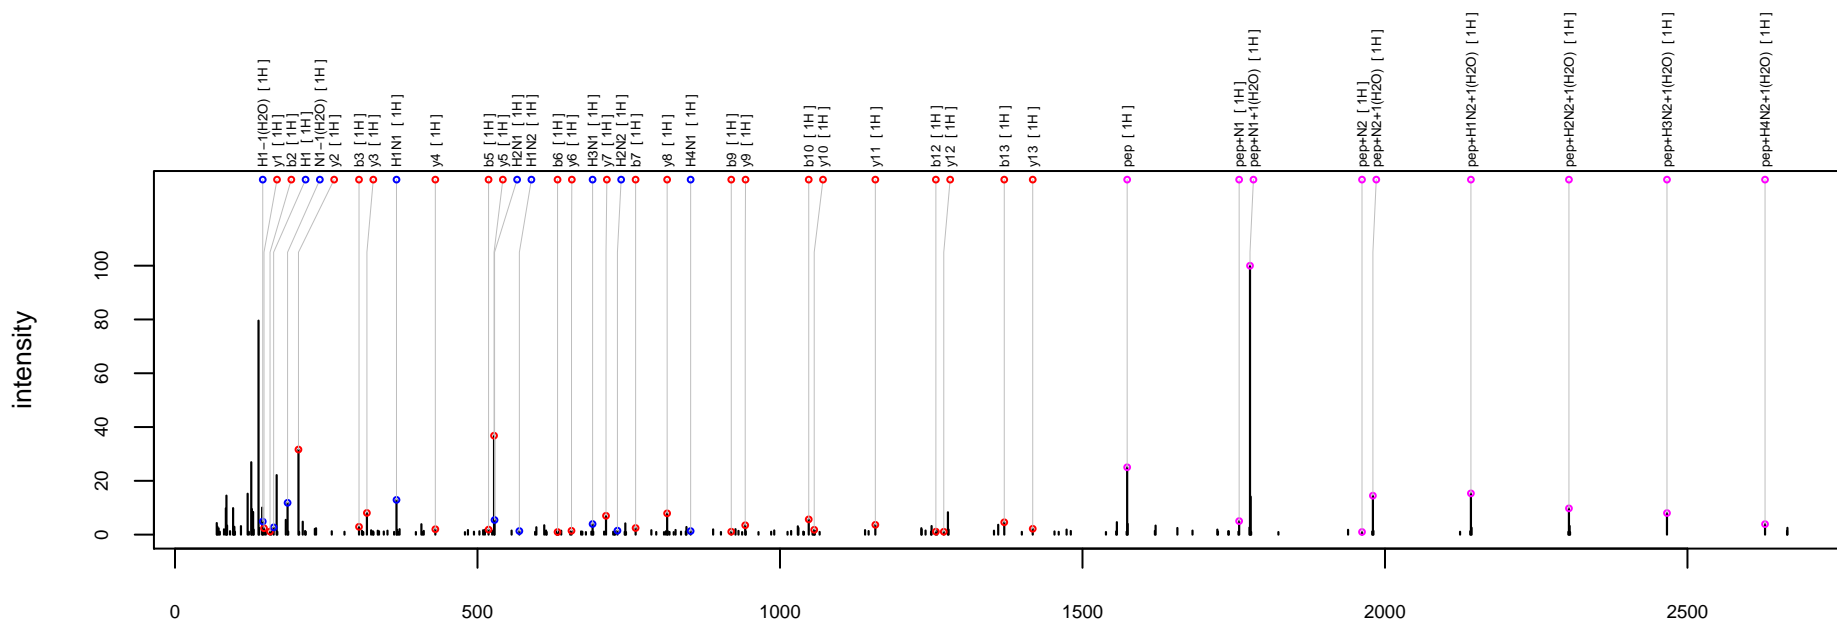

|   |    |    |    |    |    |    |   |   |    |    |    |    |    |    |   |
|---|----|----|----|----|----|----|---|---|----|----|----|----|----|----|---|
|   | 2  | 3  | 4  | 5  | 6  | 7  | 8 | 9 | 10 | 11 | 12 | 13 | 14 | 15 |   |
| b | G  | V  | F  | I  | T  | N  | E | T | G  | Q  | P  | L  | I  | G  | K |
|   | 15 | 14 | 13 | 12 | 11 | 10 | 9 | 8 | 7  | 6  | 5  | 4  | 3  | 2  | 1 |
|   |    |    |    |    |    |    |   |   |    |    |    |    |    |    | y |

- peptide fragments, a,b,c: N-terminal, x,y,z: C-terminal series
- glycan fragments, H:Hex, N:HexNAc, S:Neu5Ac, F:Fuc
- intact peptide and glycan fragments, pep: intact peptide
- ( ): additions
- [ ]: charge

# m/z 896.3768 charge 3 scan 0-0

Score= 78.64 , Hits= 41 , Explained Intensity= 0.49

Peptide: ASAH1\_HUMAN[255,267]:TVLENSTSYEEAK

Glycan: H(H)H(H)HNN, H5N2

Charge: 3H

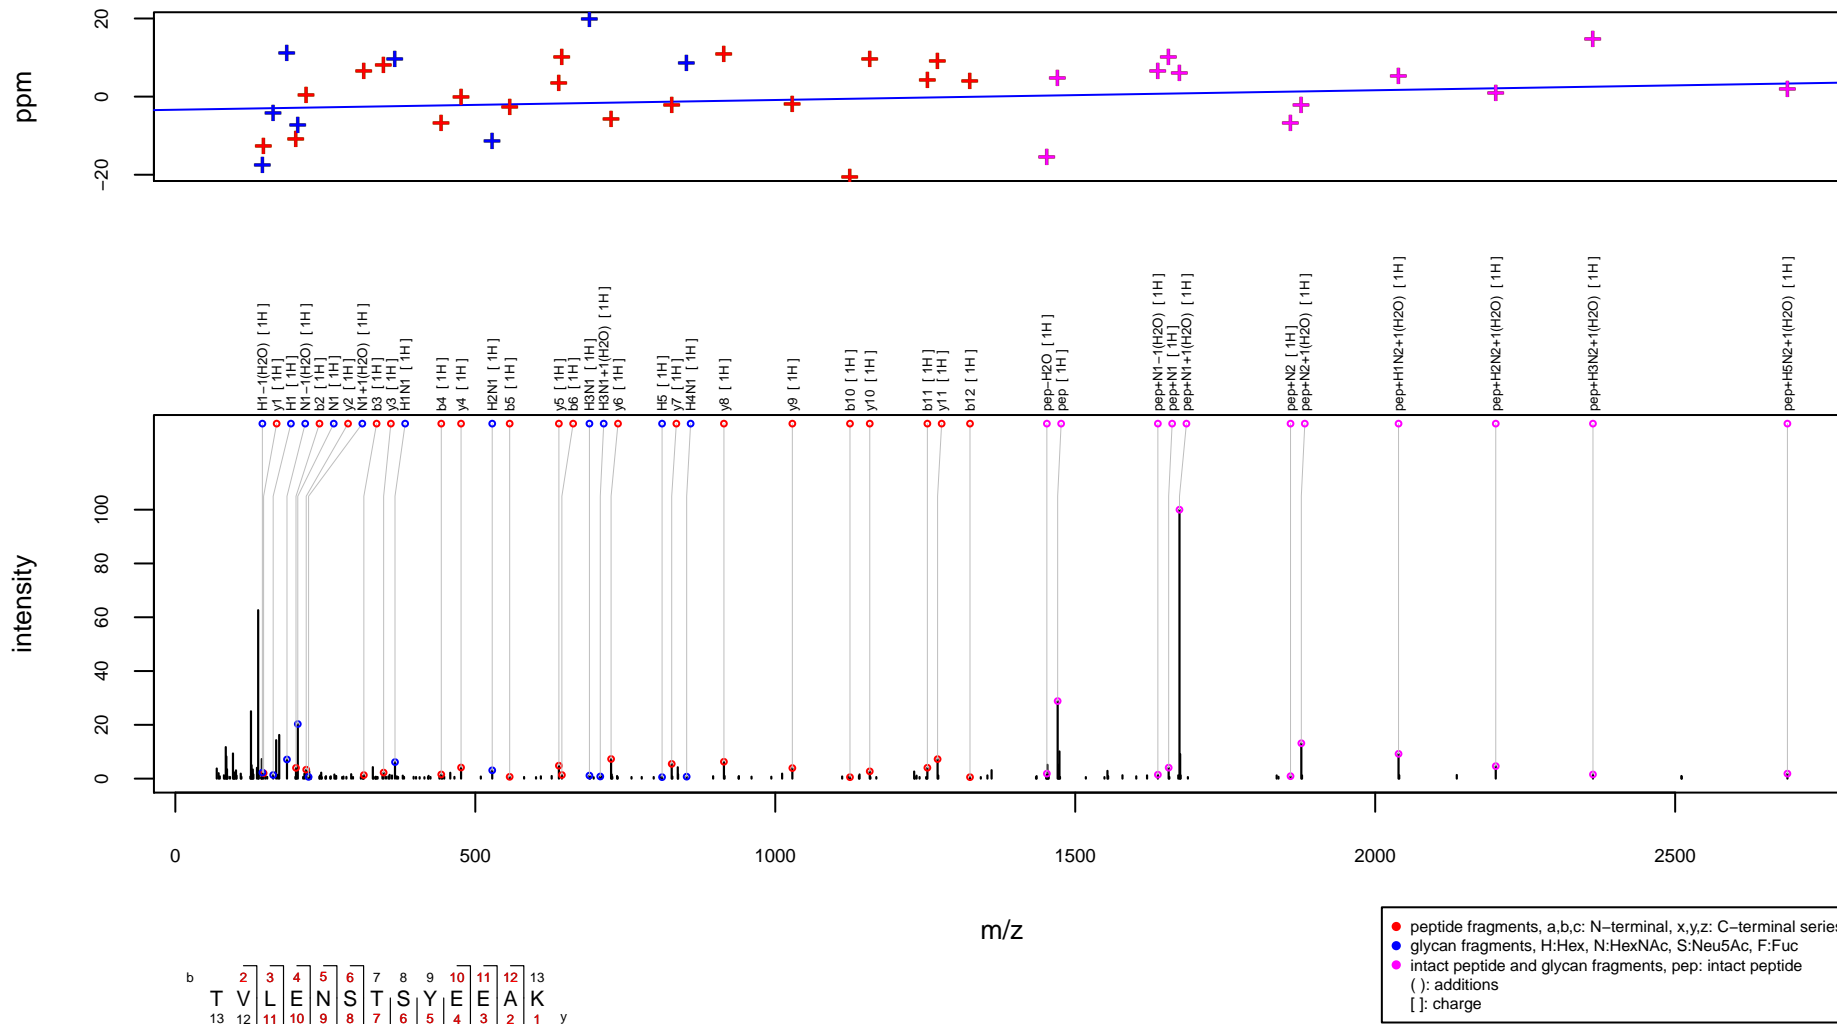

# m/z 950.3925 charge 3 scan 0-0

Score= 78.5 , Hits= 42 , Explained Intensity= 0.5

Peptide: ASAH1\_HUMAN[255,267]:TVLENSTSYEEAK

Glycan: HH(H(H)H)HNN, H6N2

Charge: 3H

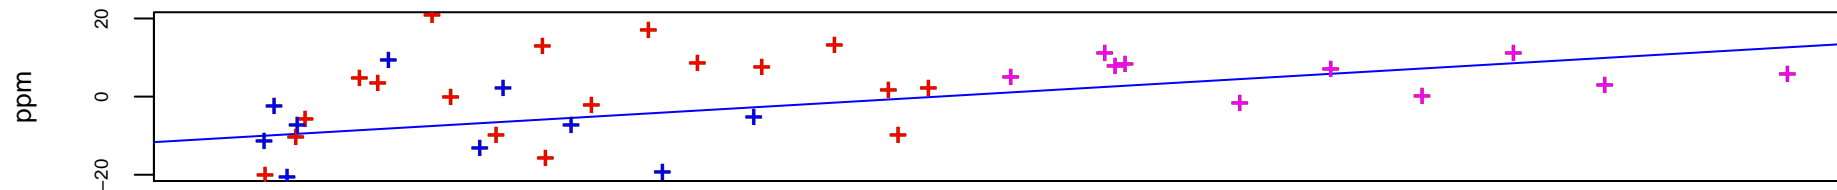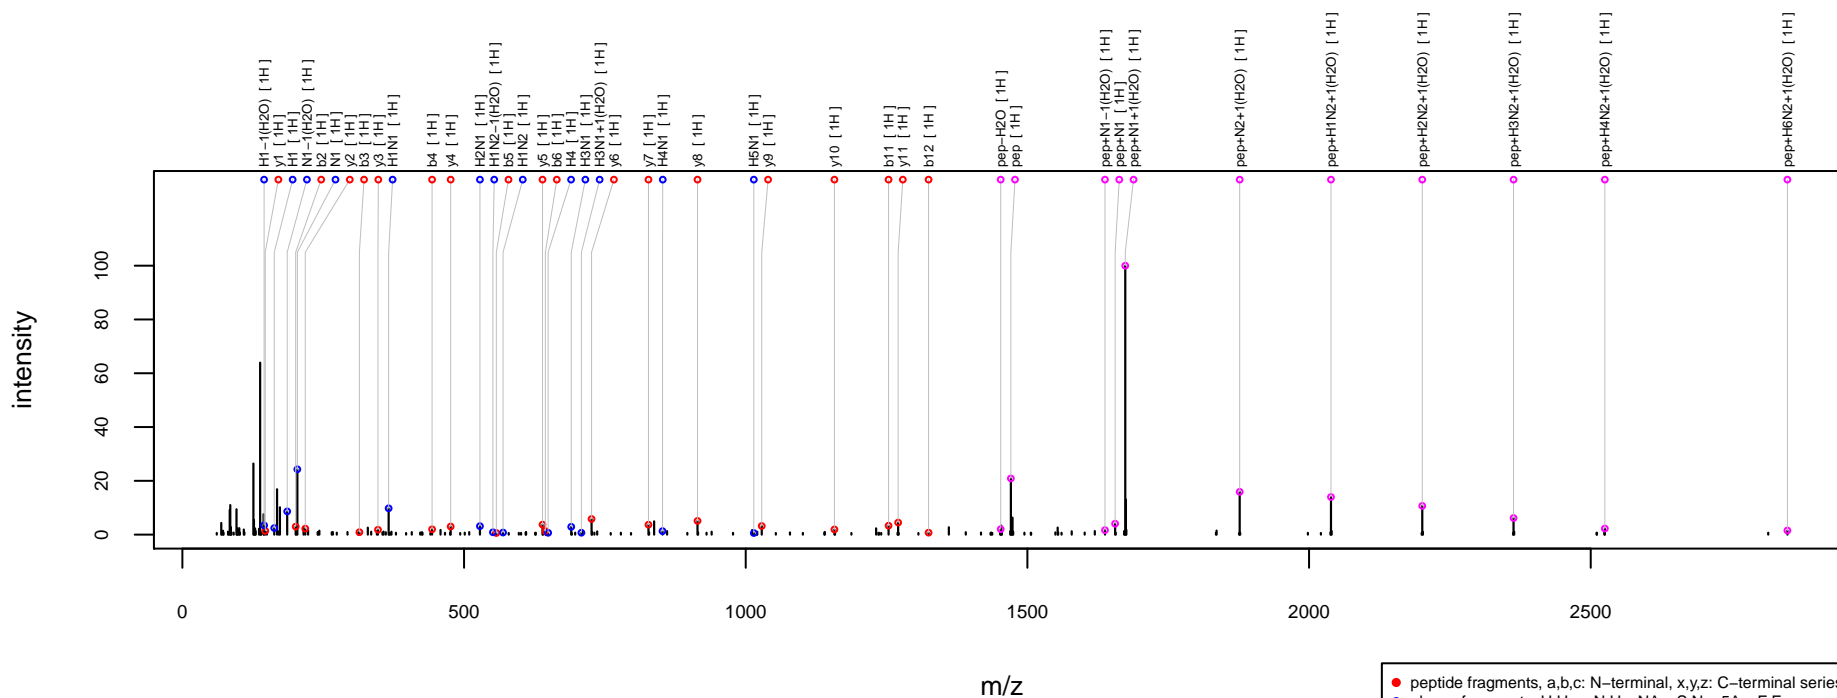

b

|    |    |    |    |   |   |   |   |    |    |    |    |   |
|----|----|----|----|---|---|---|---|----|----|----|----|---|
| 2  | 3  | 4  | 5  | 6 | 7 | 8 | 9 | 10 | 11 | 12 | 13 |   |
| T  | V  | L  | E  | N | S | T | S | Y  | E  | E  | A  | K |
| 13 | 12 | 11 | 10 | 9 | 8 | 7 | 6 | 5  | 4  | 3  | 2  | 1 |

y

- peptide fragments, a,b,c: N-terminal, x,y,z: C-terminal series
- glycan fragments, H:Hex, N:HexNAc, S:Neu5Ac, F:Fuc
- intact peptide and glycan fragments, pep: intact peptide
- ( ): additions
- [ ]: charge

# m/z 899.7146 charge 3 scan 0-0

Score= 74.66 , Hits= 40 , Explained Intensity= 0.53

Peptide: ATRN\_HUMAN[411,422]:IDSTGNVTNELR

Glycan: HH(H(H)H)HNN, H6N2

Charge: 3H

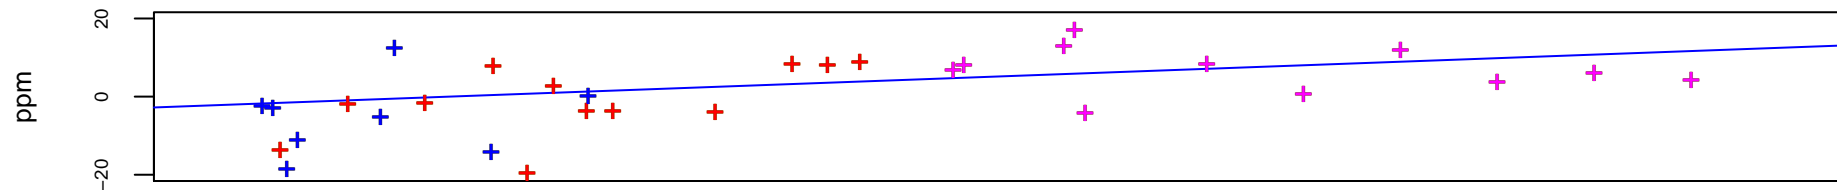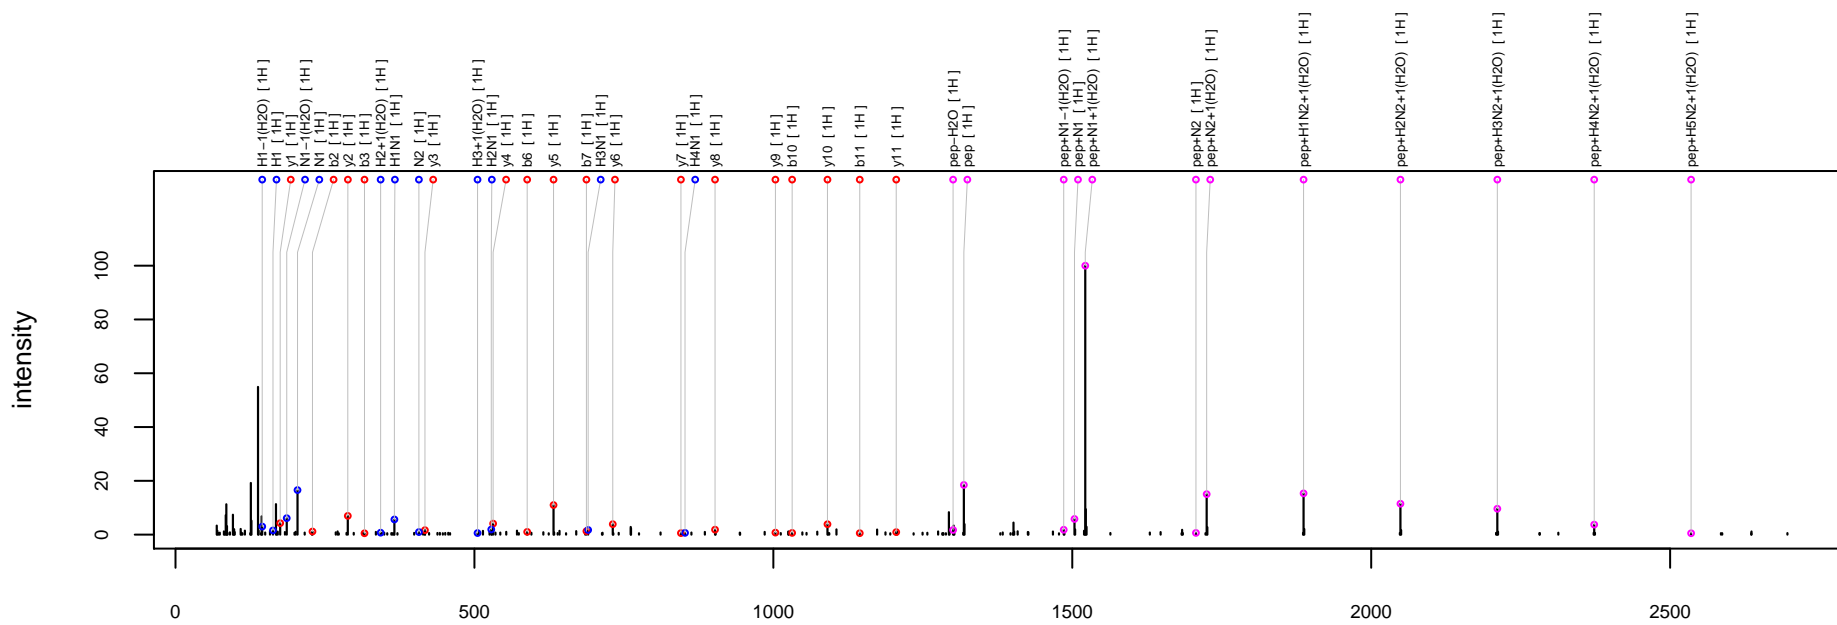

|   |    |    |    |   |   |   |   |   |    |    |    |   |
|---|----|----|----|---|---|---|---|---|----|----|----|---|
|   | 2  | 3  | 4  | 5 | 6 | 7 | 8 | 9 | 10 | 11 | 12 |   |
| b | I  | D  | S  | T | G | N | V | T | N  | E  | L  | R |
|   | 12 | 11 | 10 | 9 | 8 | 7 | 6 | 5 | 4  | 3  | 2  | 1 |

y

- peptide fragments, a,b,c: N-terminal, x,y,z: C-terminal series
- glycan fragments, H:Hex, N:HexNAc, S:Neu5Ac, F:Fuc
- intact peptide and glycan fragments, pep: intact peptide
- ( ): additions
- [ ]: charge

# m/z 1098.147 charge 3 scan 0-0

Score= 69.07 , Hits= 41 , Explained Intensity= 0.43

Peptide: APOD\_HUMAN[83,104]:ADGTVNQIEGATPVNLTEPAK

Glycan: H3N2F1

Charge: 3H

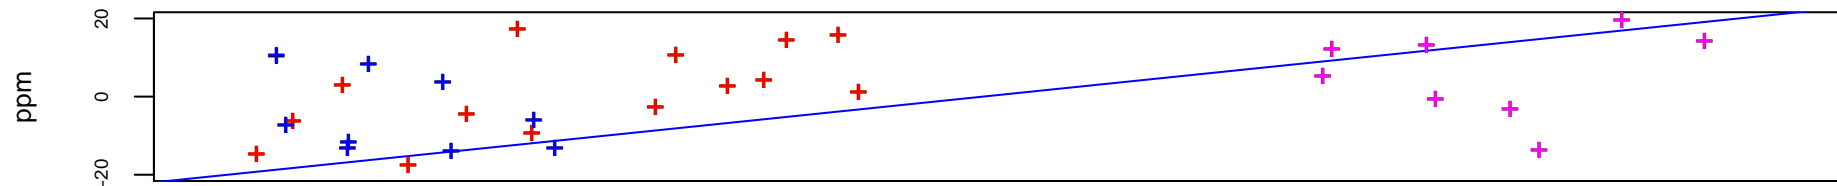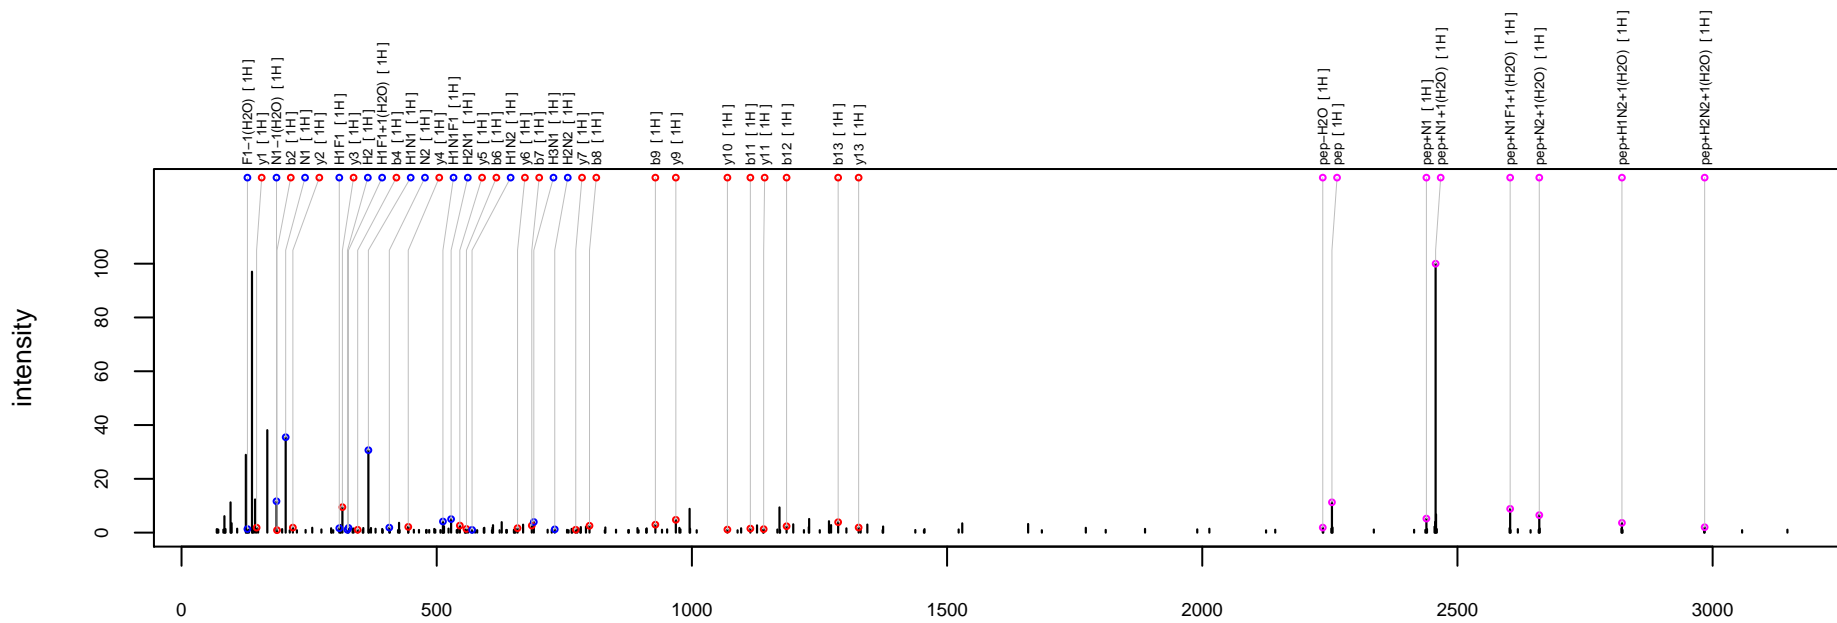

b 2 3 4 5 6 7 8 9 10 11 12 13 14 15 16 17 18 19 20 21 22  
 A D G T V N Q I E G E A T P V N L T E P A K  
 22 21 20 19 18 17 16 15 14 13 12 11 10 9 8 7 6 5 4 3 2 1 y

● peptide fragments, a,b,c: N-terminal, x,y,z: C-terminal series  
 ● glycan fragments, H:Hex, N:HexNAc, S:Neu5Ac, F:Fuc  
 ● intact peptide and glycan fragments, pep: intact peptide  
 ( ): additions  
 [ ]: charge



# m/z 1220.08 charge 4 scan 0-0

Score= 89.05 , Hits= 52 , Explained Intensity= 0.59

Peptide: IGHA1\_HUMAN[127,153]:LSLHRPALEDLLLGSEANLTCTLTGLR

Glycan: SHNH(HNH)HNN, S1H5N4

Charge: 4H

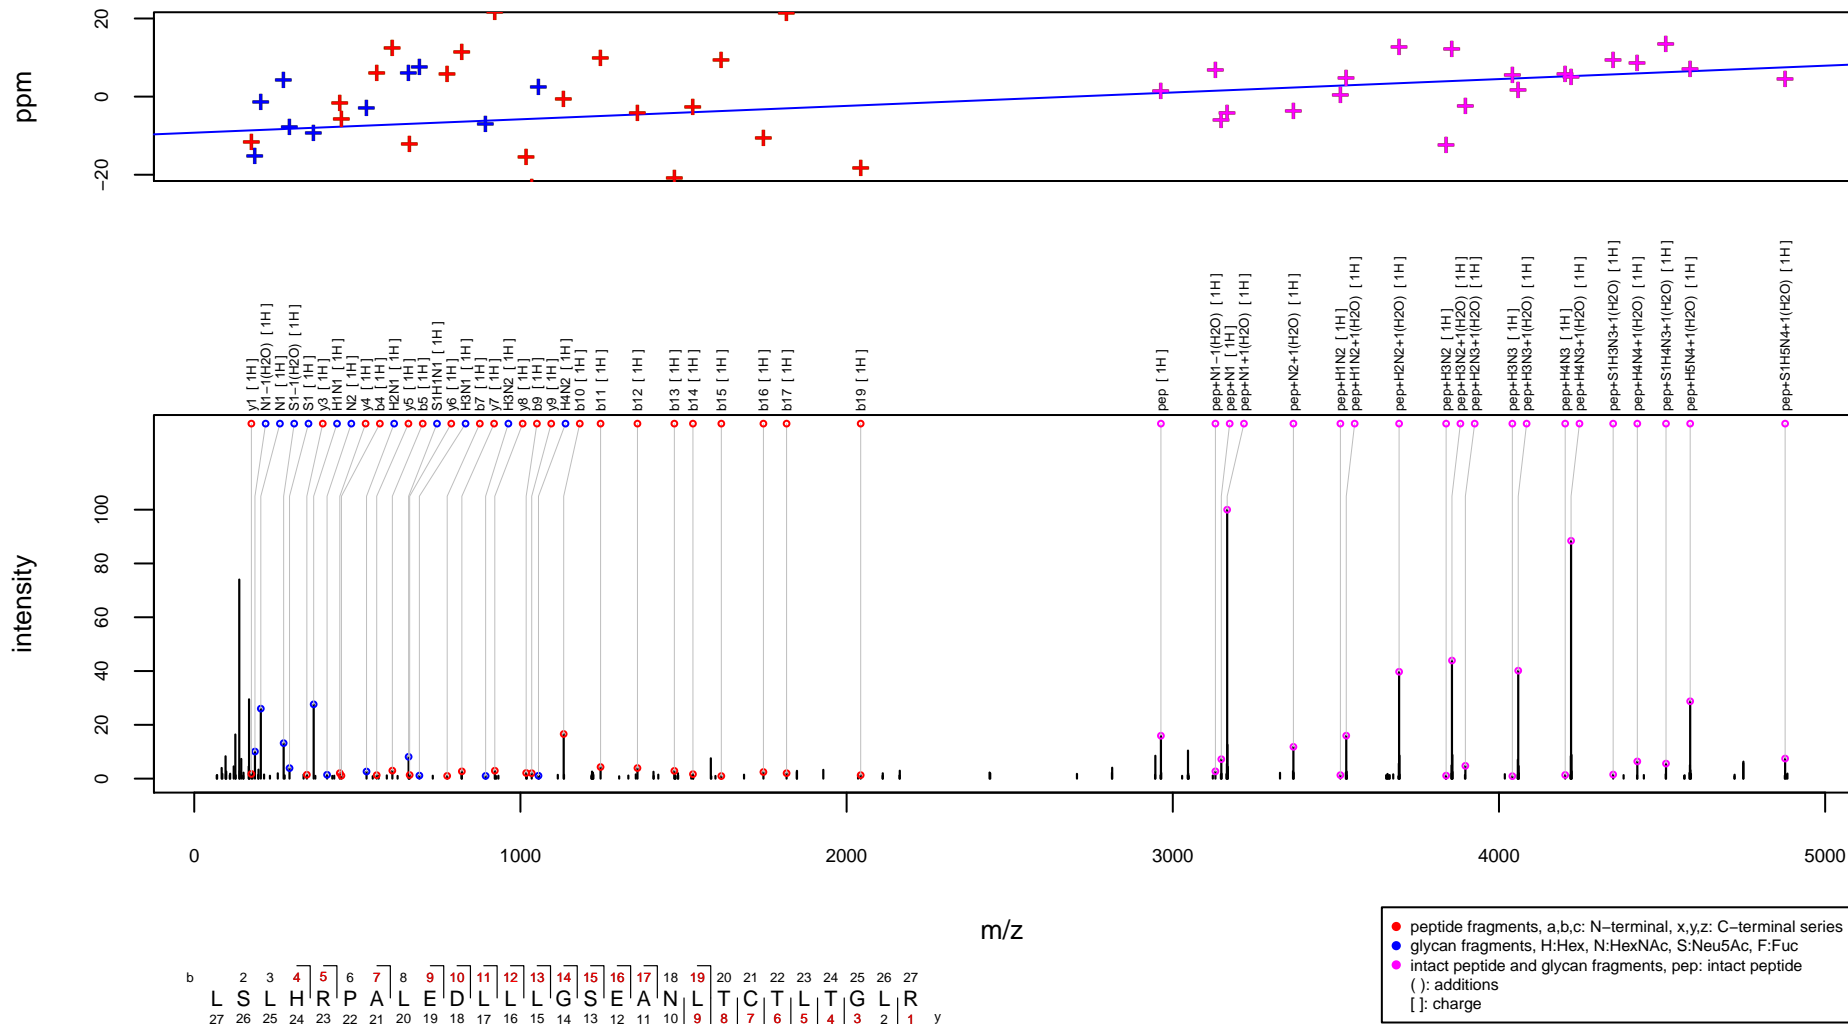

# m/z 1004.4111 charge 3 scan 0-0

Score= 74.58 , Hits= 41 , Explained Intensity= 0.53

Peptide: ASAH1\_HUMAN[255,267]:TVLENSTSYEEAK

Glycan: HHH(H(H)H)HNN, H7N2

Charge: 3H

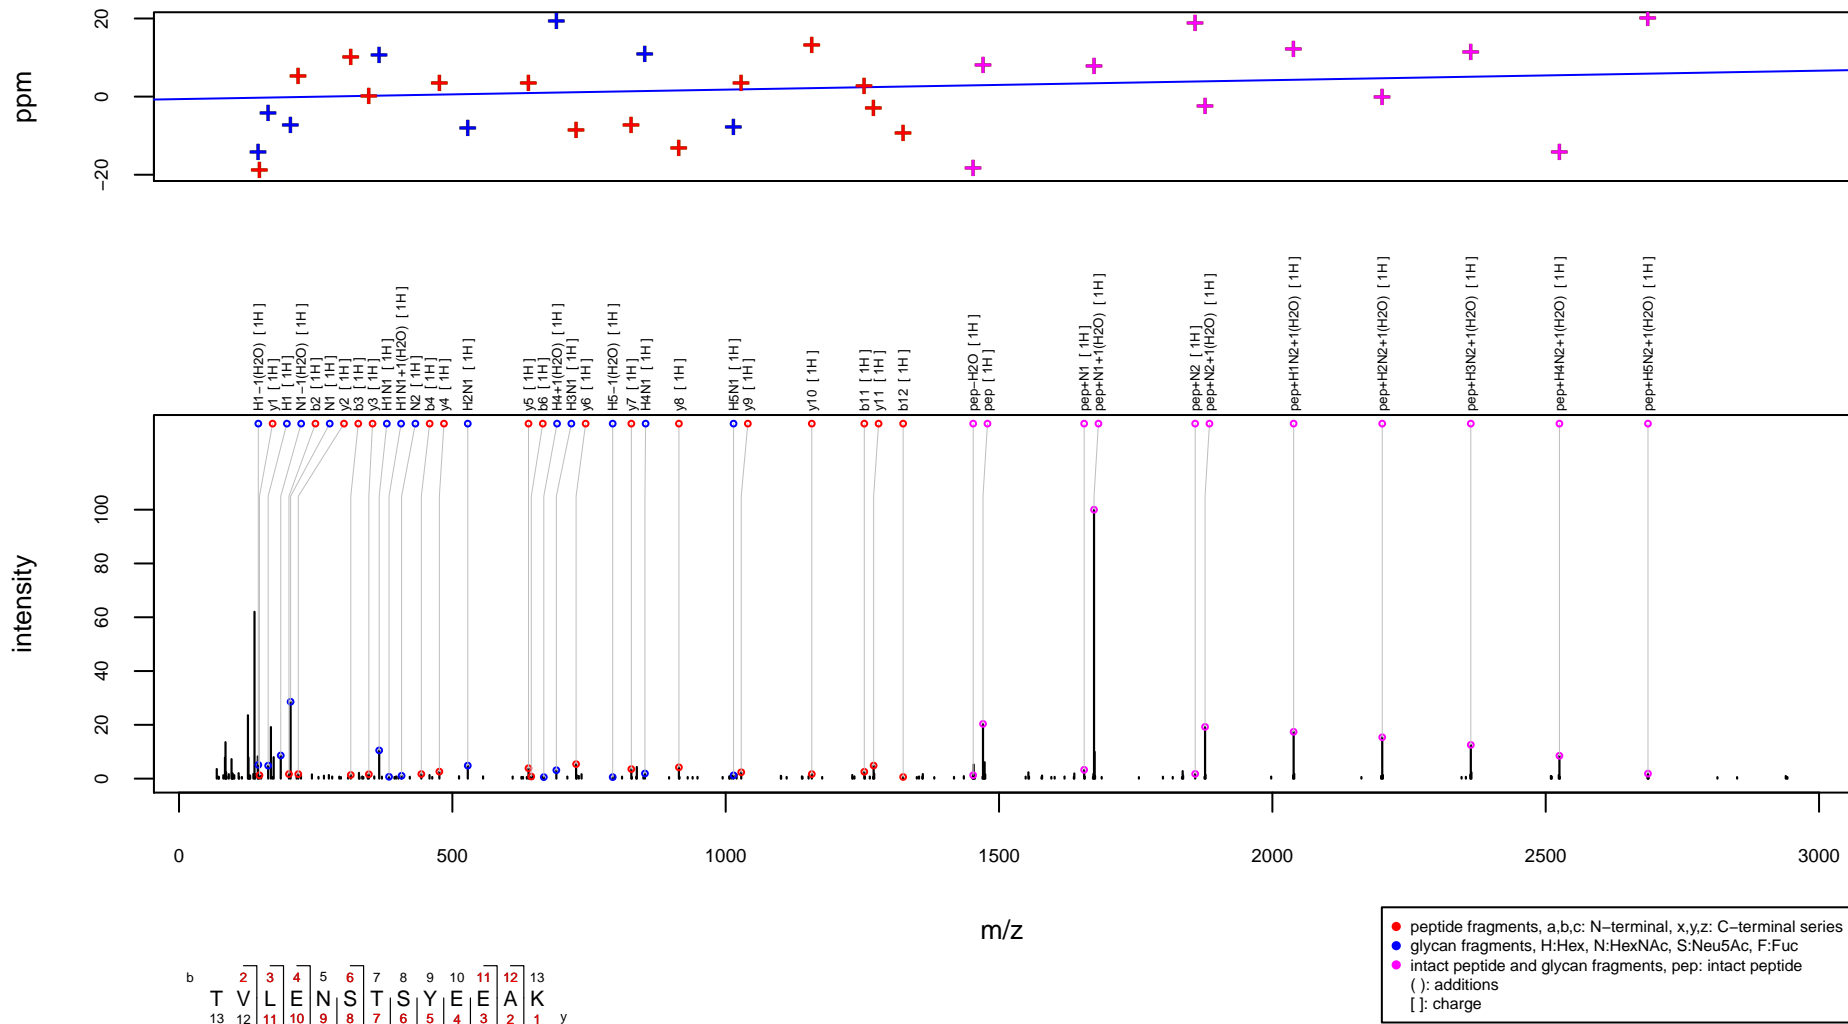

# m/z 1026.4133 charge 3 scan 0-0

Score= 84.1 , Hits= 48 , Explained Intensity= 0.44

Peptide: NEP\_HUMAN[142,152]:SCINESAIDSR

Glycan: HNH(HNH)(N)HNN, H5N5

Charge: 3H

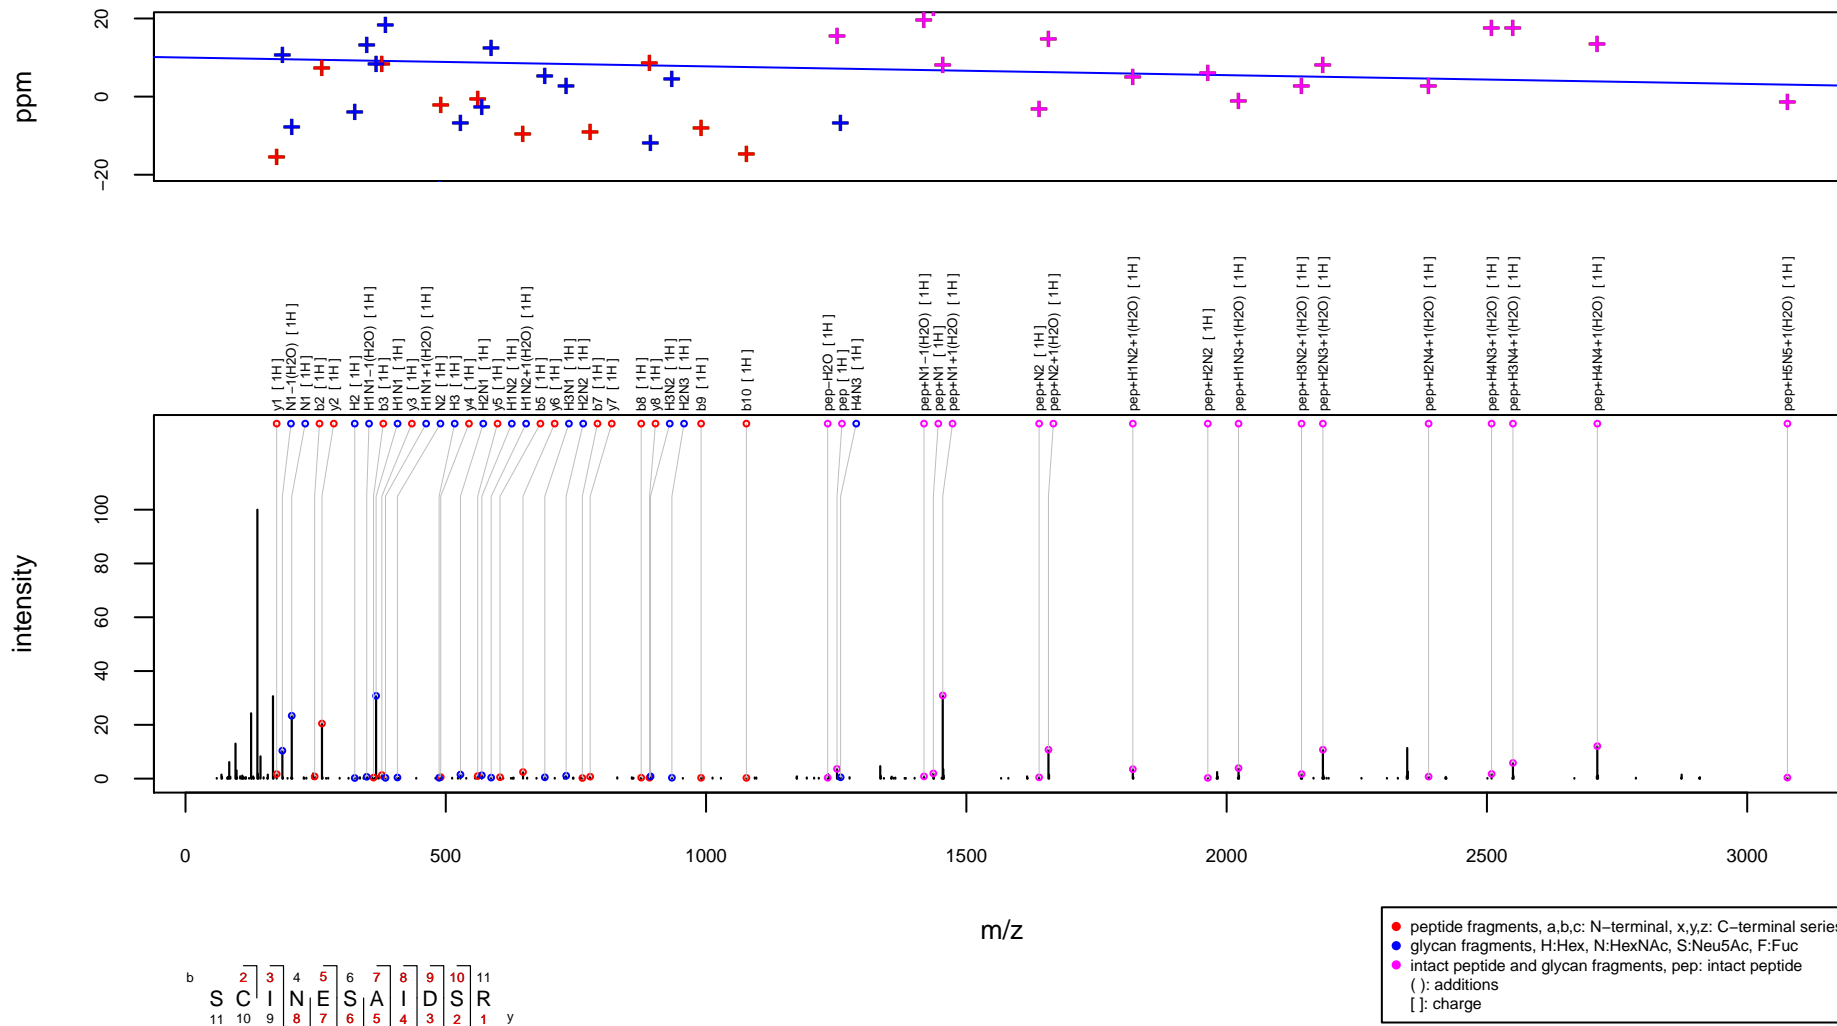

# m/z 982.7845 charge 3 scan 0-0

Score= 67.55 , Hits= 38 , Explained Intensity= 0.38

Peptide: AMPN\_HUMAN[231,241]:AEFNITLIHPK

Glycan: HNH(NH)(N)HNN, H4N5

Charge: 3H

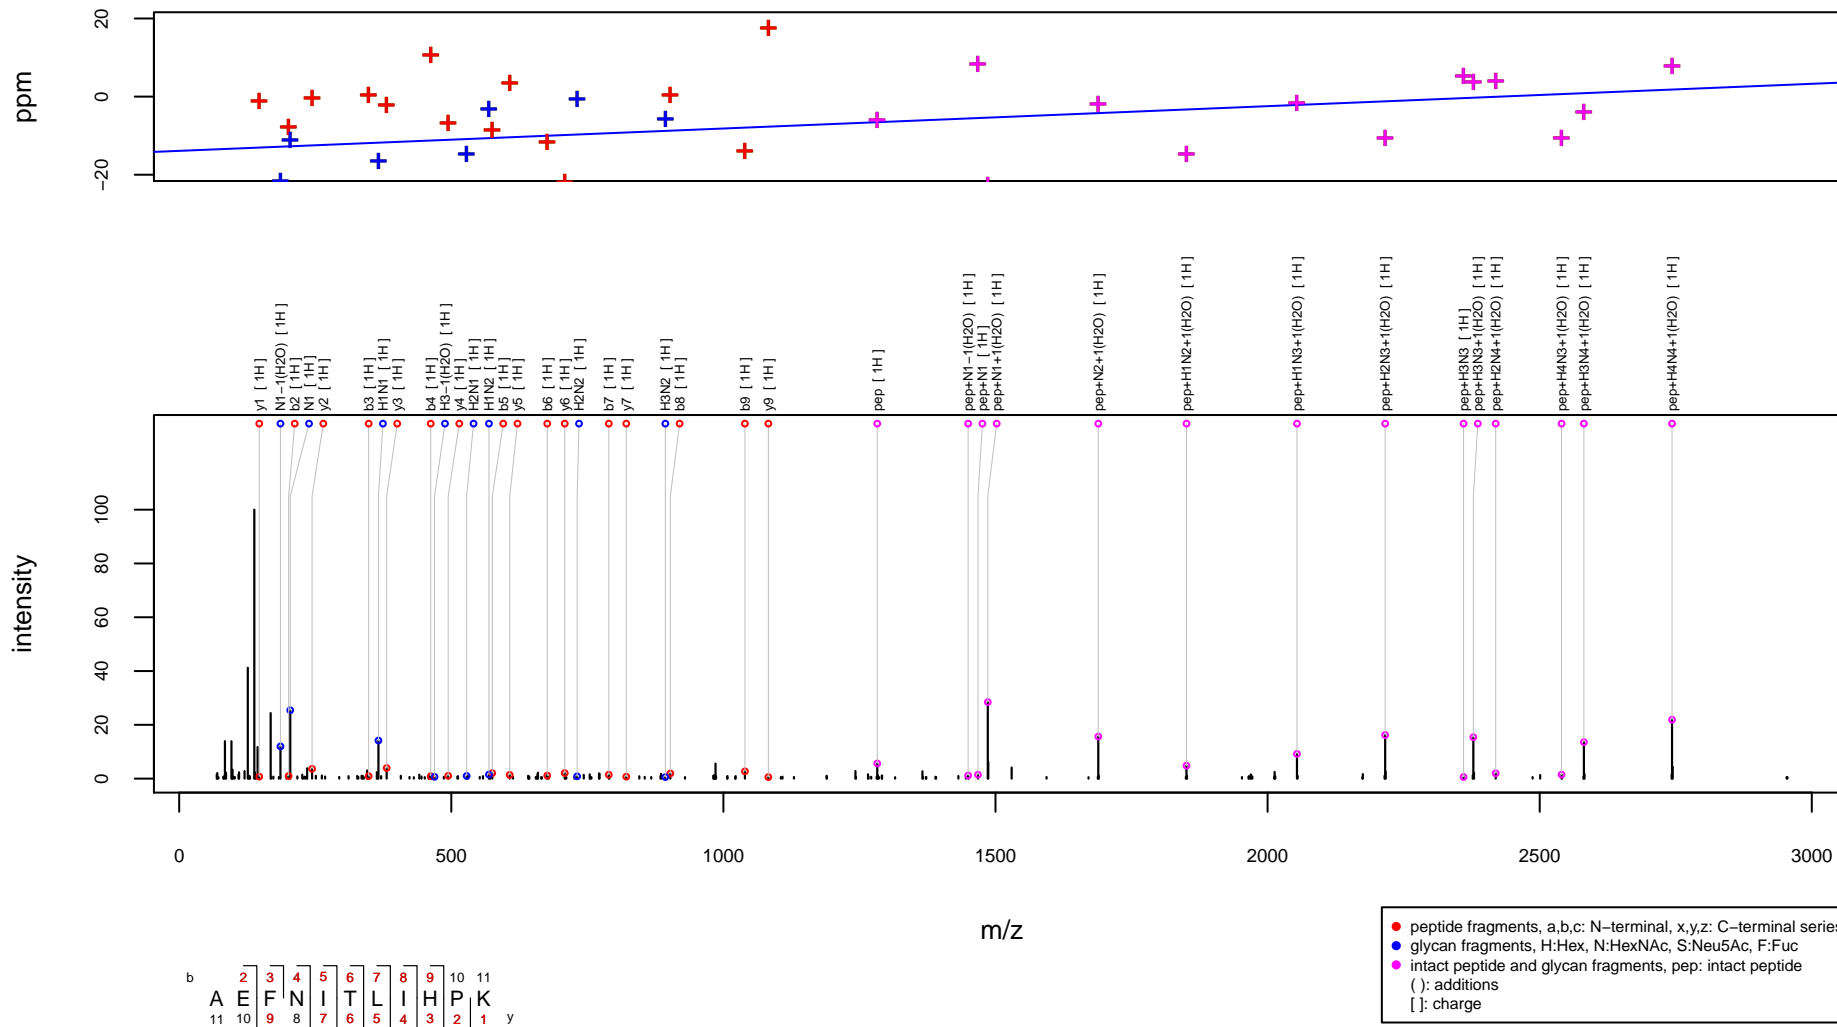

# m/z 923.4094 charge 3 scan 0-0

Score= 79.93 , Hits= 49 , Explained Intensity= 0.36

Peptide: IGHA2\_HUMAN[200,208]:TPLTANITK

Glycan: HNH(NH)(N)HN(F)N, H4N5F1

Charge: 3H

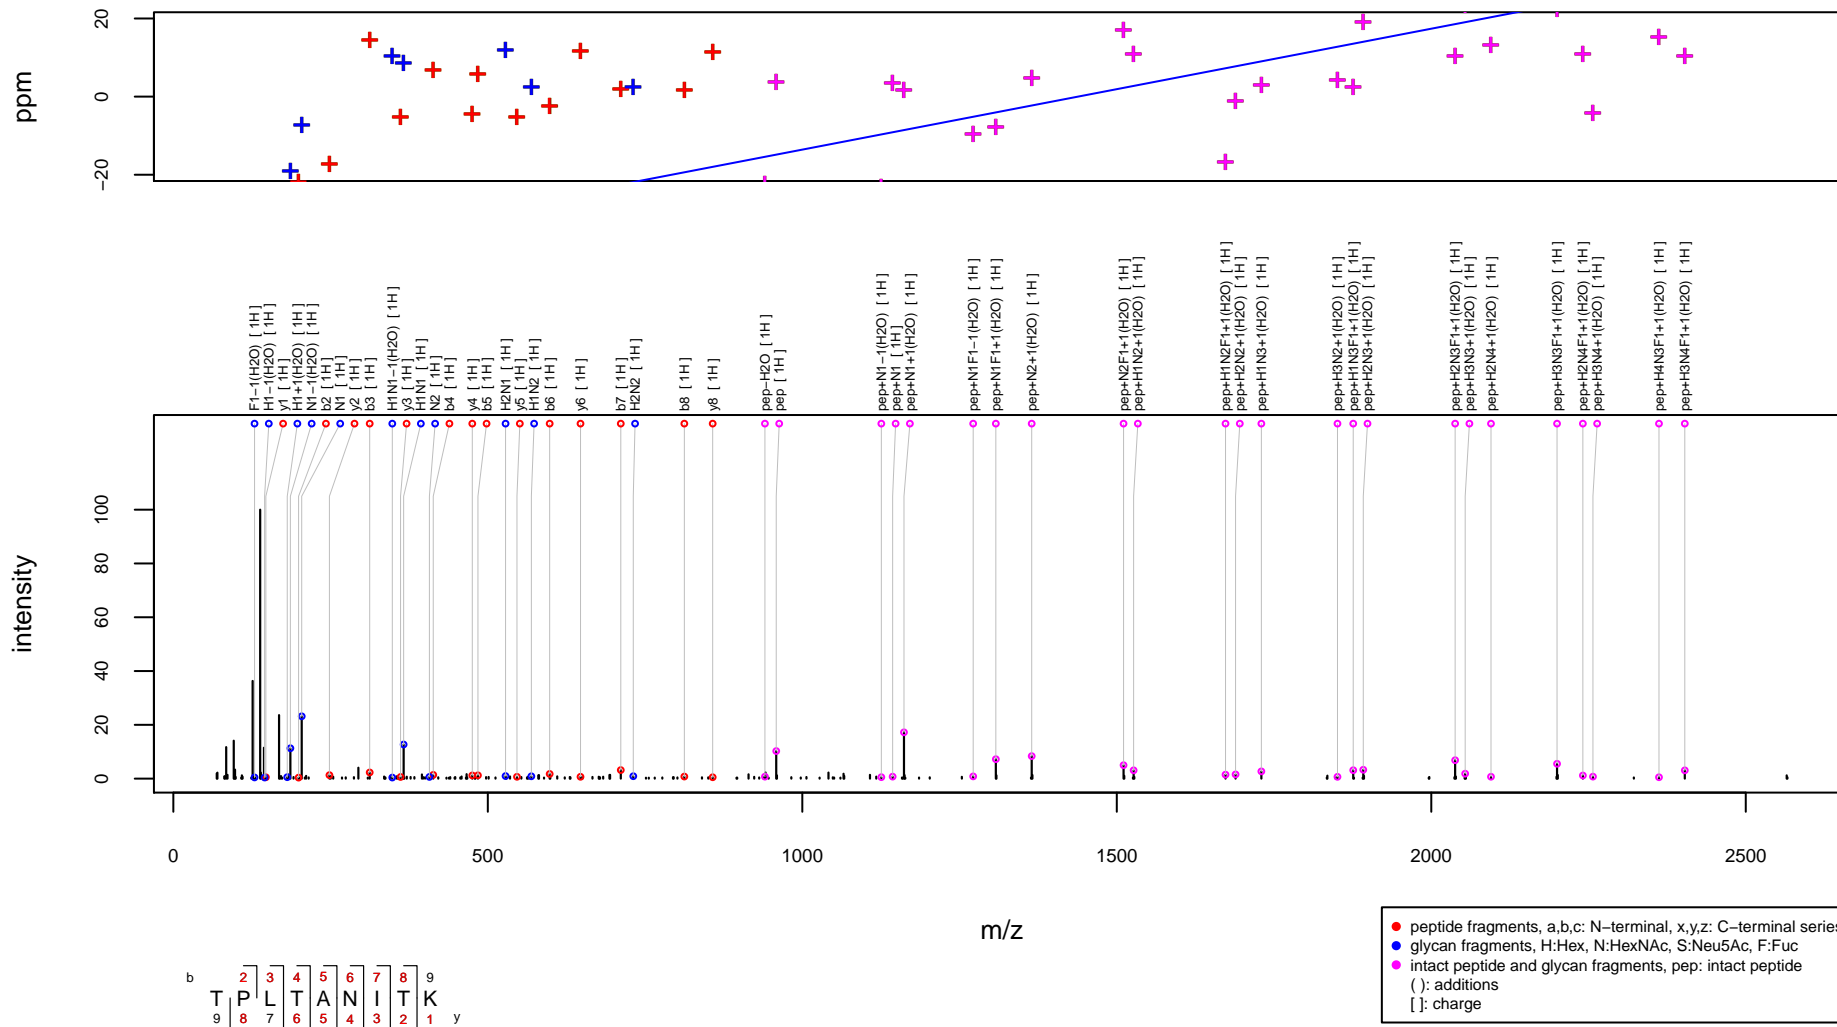

# m/z 971.168 charge 4 scan 0-0

Score= 80.87 , Hits= 48 , Explained Intensity= 0.5

Peptide: THBG\_HUMAN[27,41]:VTACHSSQP NATLYK

Glycan: SHNH(SHNH)HNN, S2H5N4

Charge: 4H

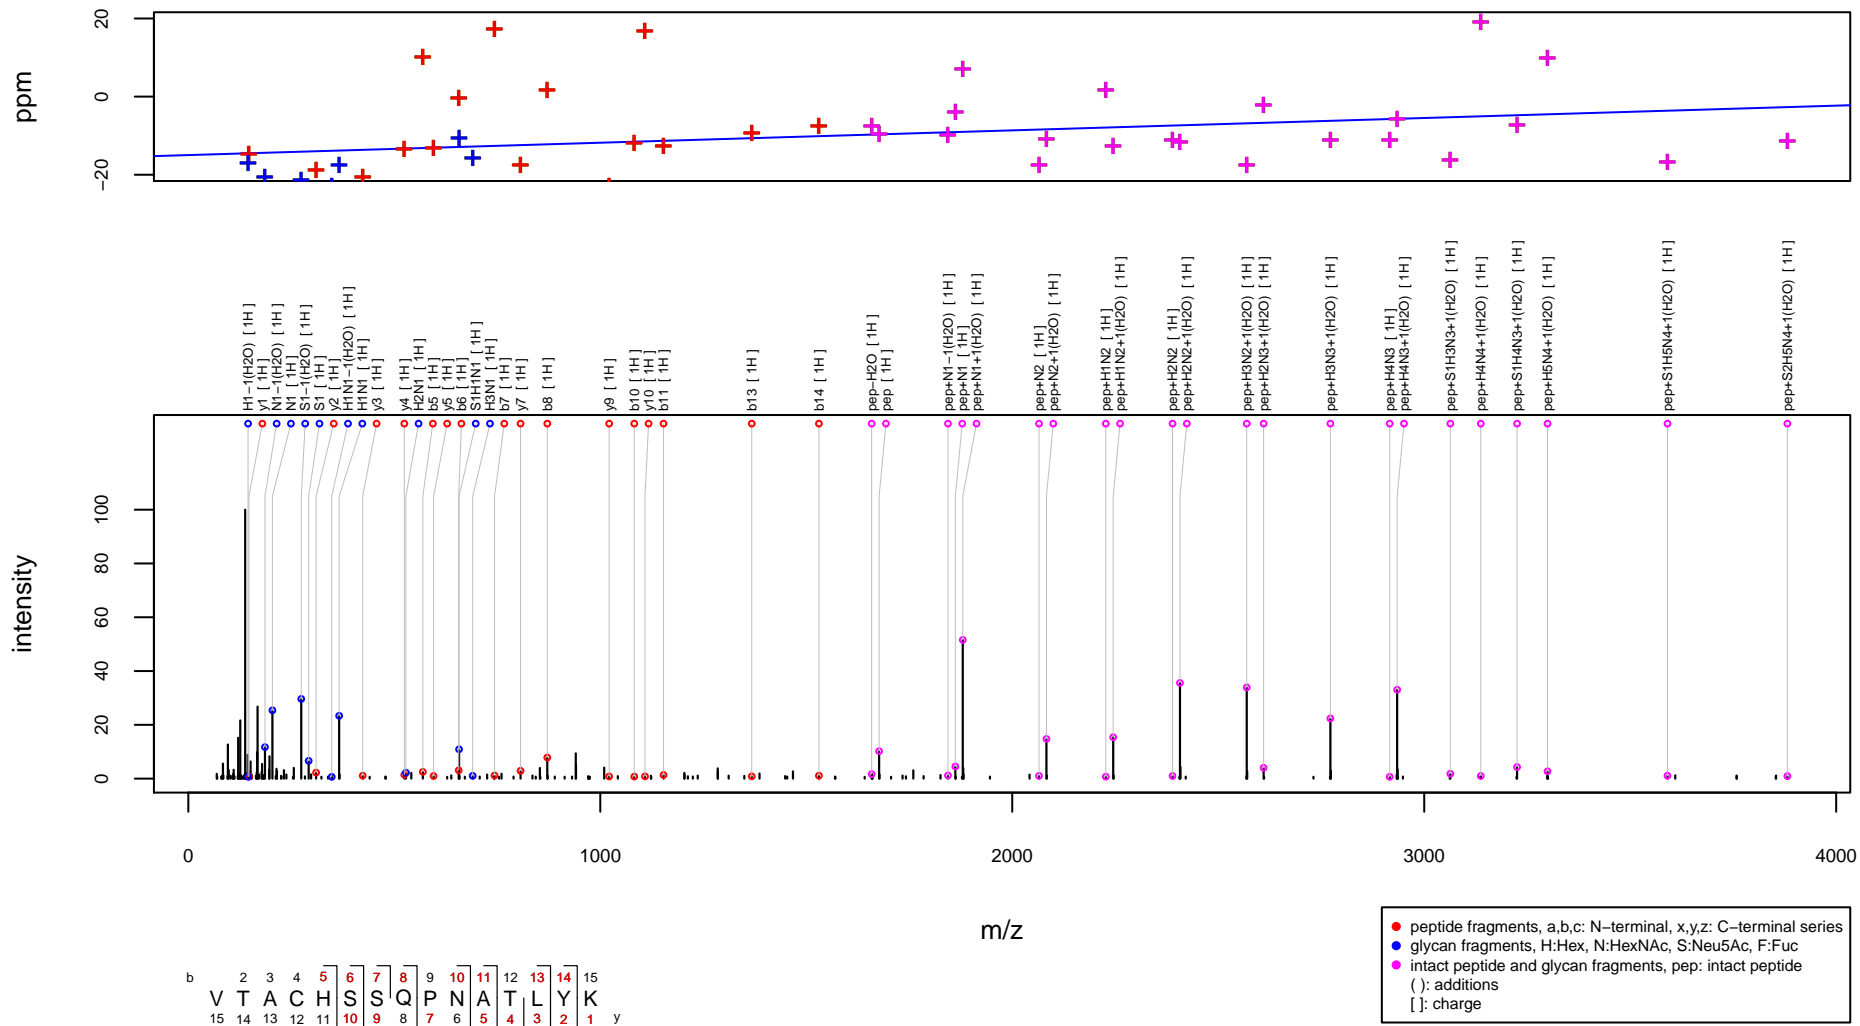

# m/z 1007.7501 charge 3 scan 0-0

Score= 76.55 , Hits= 43 , Explained Intensity= 0.62

Peptide: ATRN\_HUMAN[411,422]:IDSTGNVTNELR

Glycan: HHH(HH(H)H)HNN, H8N2

Charge: 3H

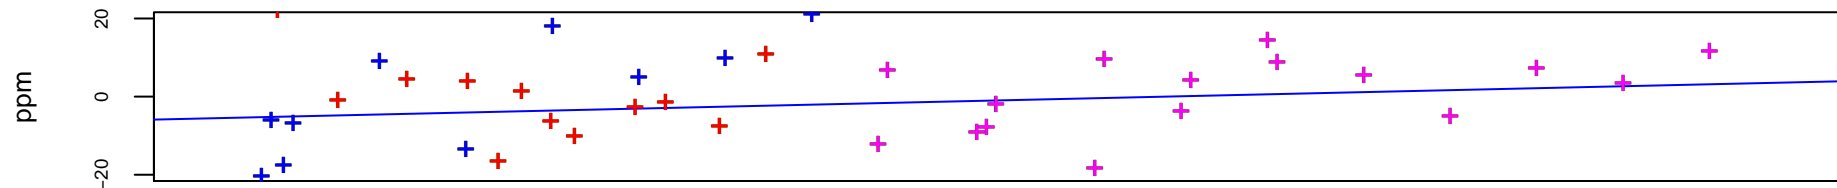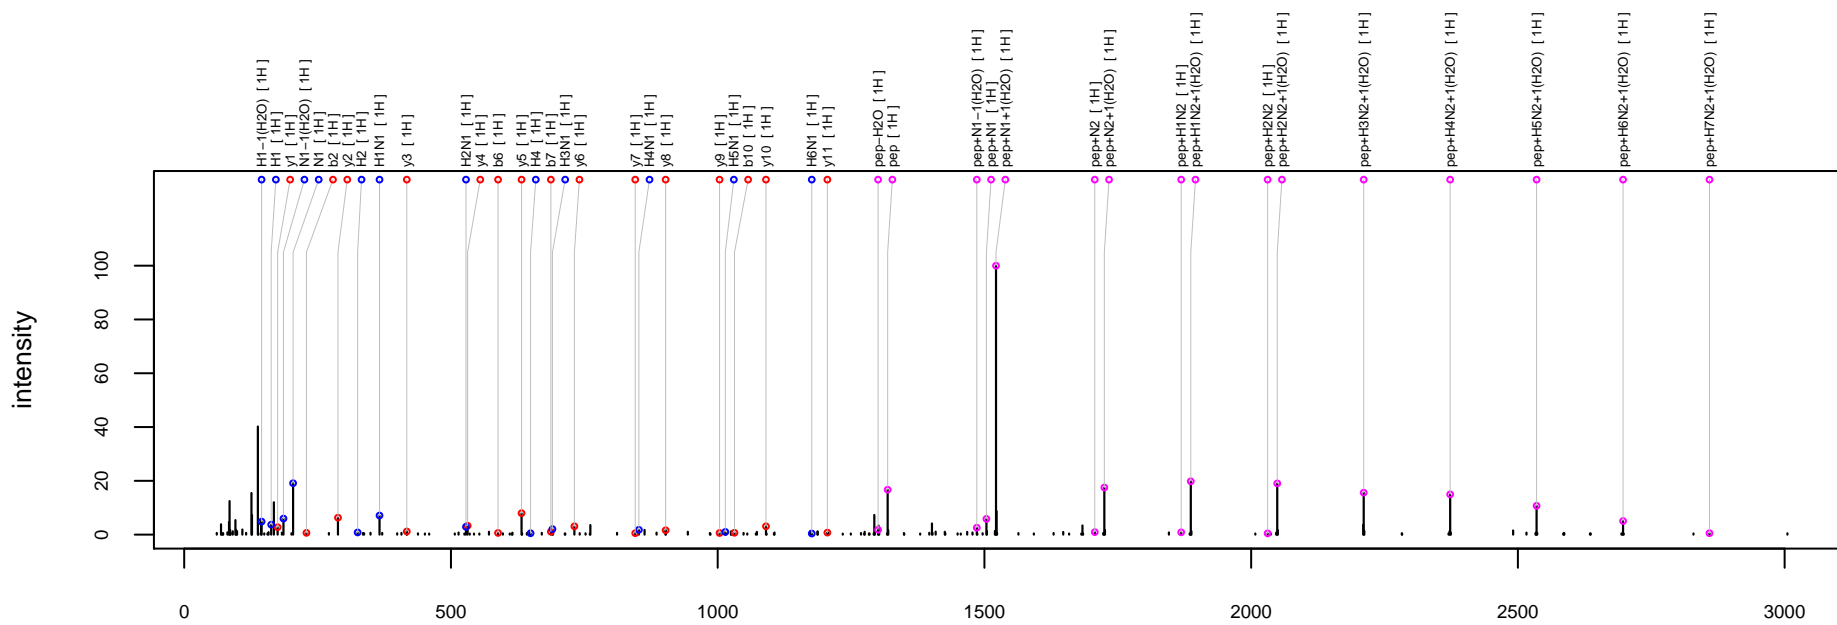

|   |    |    |    |   |   |   |   |   |    |    |    |   |
|---|----|----|----|---|---|---|---|---|----|----|----|---|
|   | 2  | 3  | 4  | 5 | 6 | 7 | 8 | 9 | 10 | 11 | 12 |   |
| b | I  | D  | S  | T | G | N | V | T | N  | E  | L  | R |
|   | 12 | 11 | 10 | 9 | 8 | 7 | 6 | 5 | 4  | 3  | 2  | 1 |
|   |    |    |    |   |   |   |   |   |    |    |    | y |

- peptide fragments, a,b,c: N-terminal, x,y,z: C-terminal series
- glycan fragments, H:Hex, N:HexNAc, S:Neu5Ac, F:Fuc
- intact peptide and glycan fragments, pep: intact peptide
- ( ): additions
- [ ]: charge

# m/z 951.073 charge 3 scan 0-0

Score= 74.48 , Hits= 43 , Explained Intensity= 0.39

Peptide: CUBN\_HUMAN[3457,3468]:NGSNSNSPLL GK

Glycan: HNH(NH)(N)HNN, H4N5

Charge: 3H

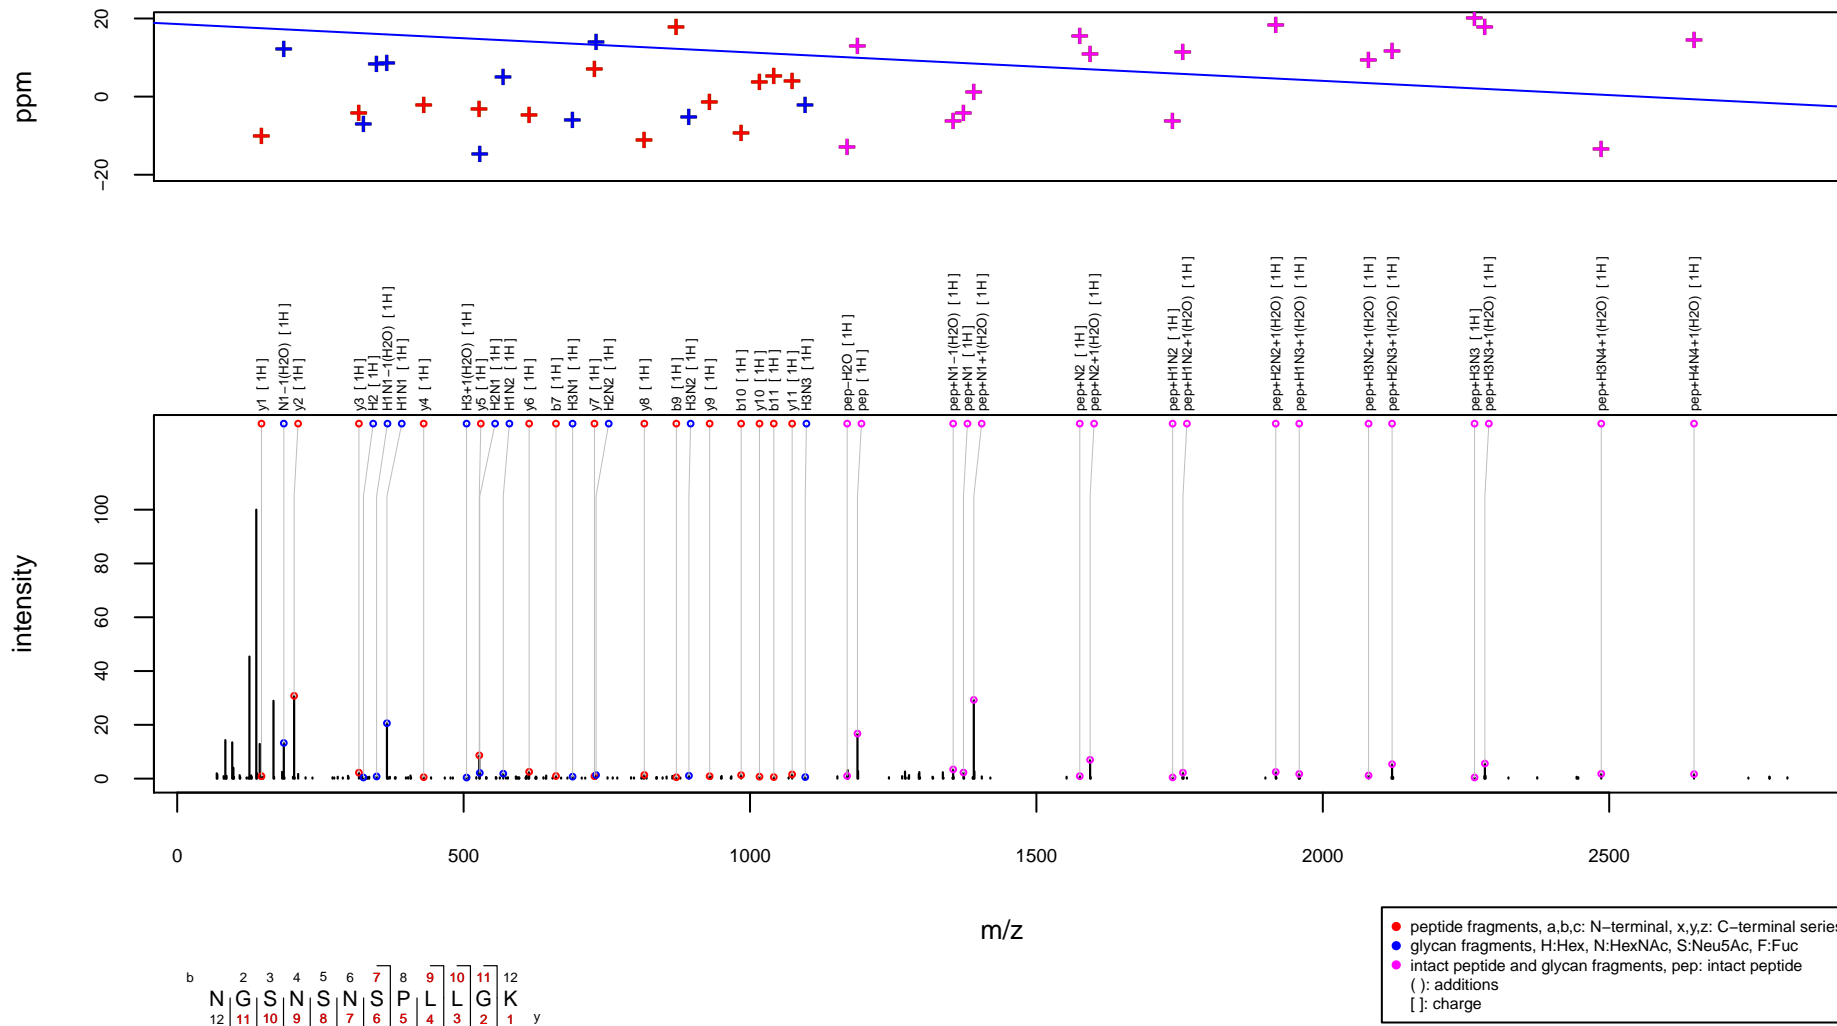



# m/z 937.3969 charge 3 scan 0-0

Score= 68.86 , Hits= 41 , Explained Intensity= 0.36

Peptide: CUBN\_HUMAN[3457,3468]:NGSNSNSPLL GK

Glycan: H5N4

Charge: 3H

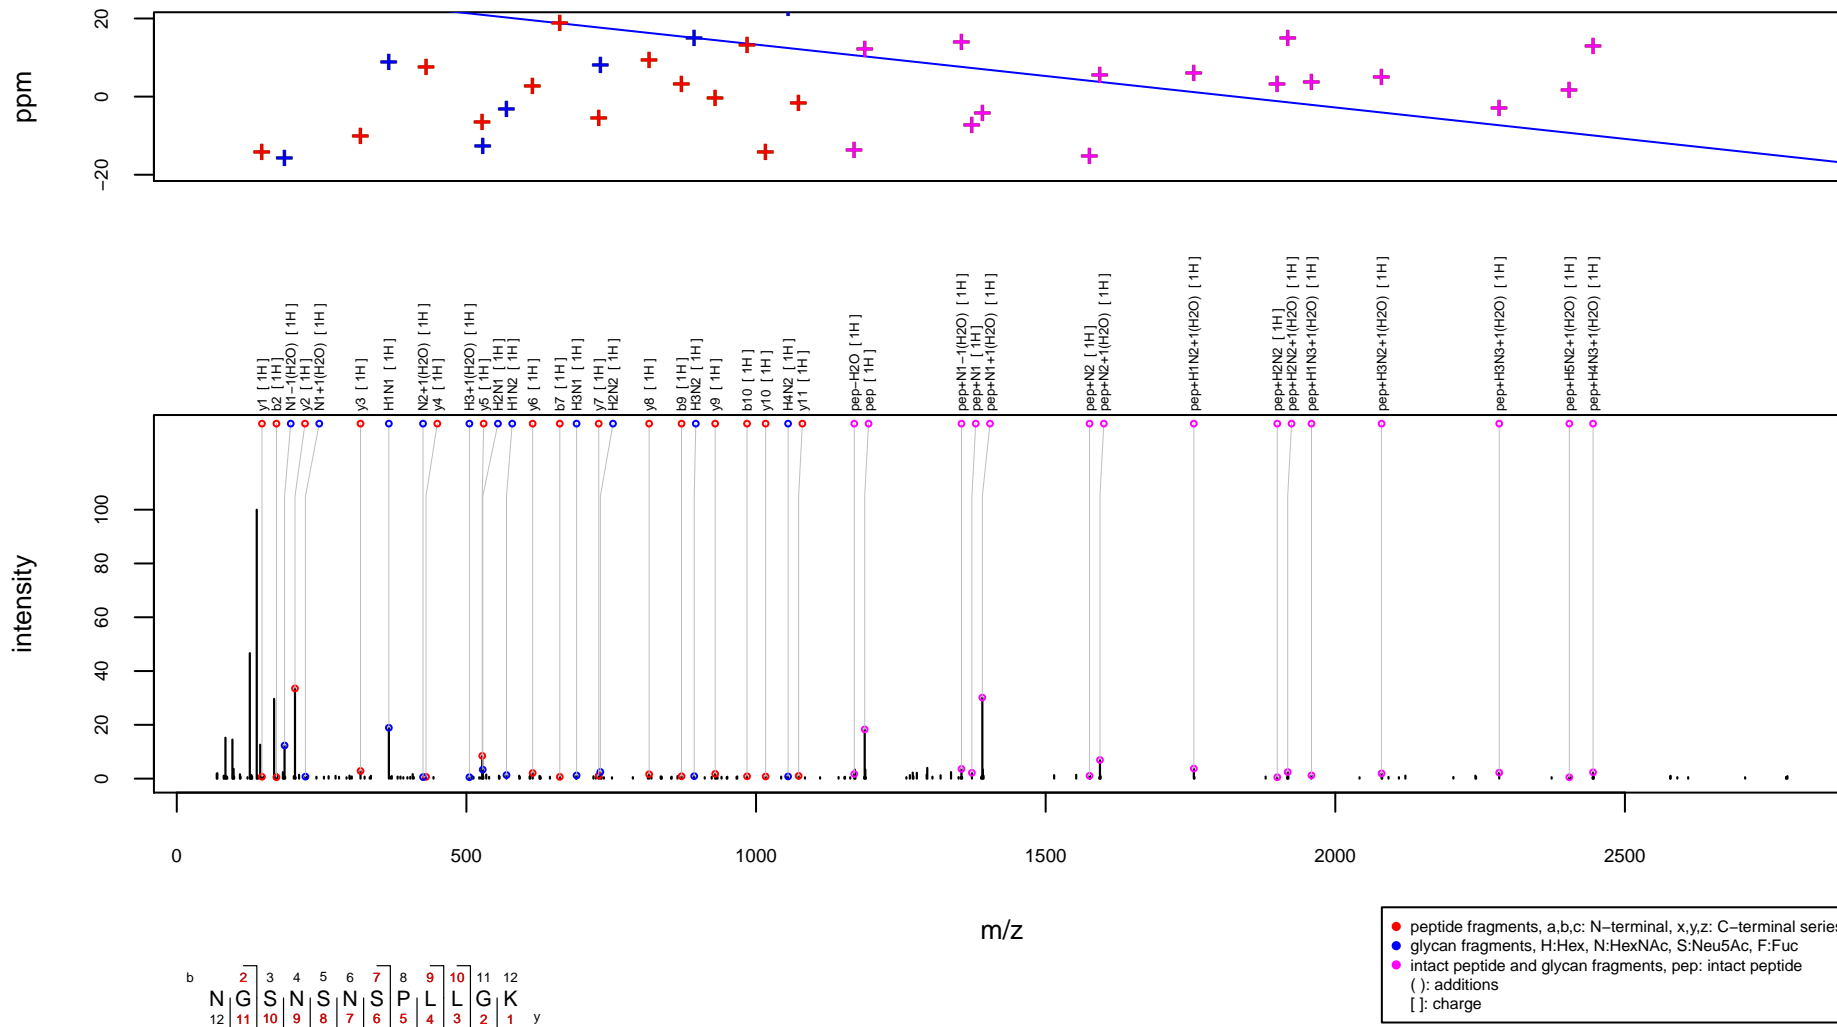

# m/z 897.0562 charge 3 scan 0-0

Score= 77.29 , Hits= 43 , Explained Intensity= 0.38

Peptide: CUBN\_HUMAN[3457,3468]:NGSNSNSPLL GK

Glycan: NH(NH)(N)HNN, H3N5

Charge: 3H

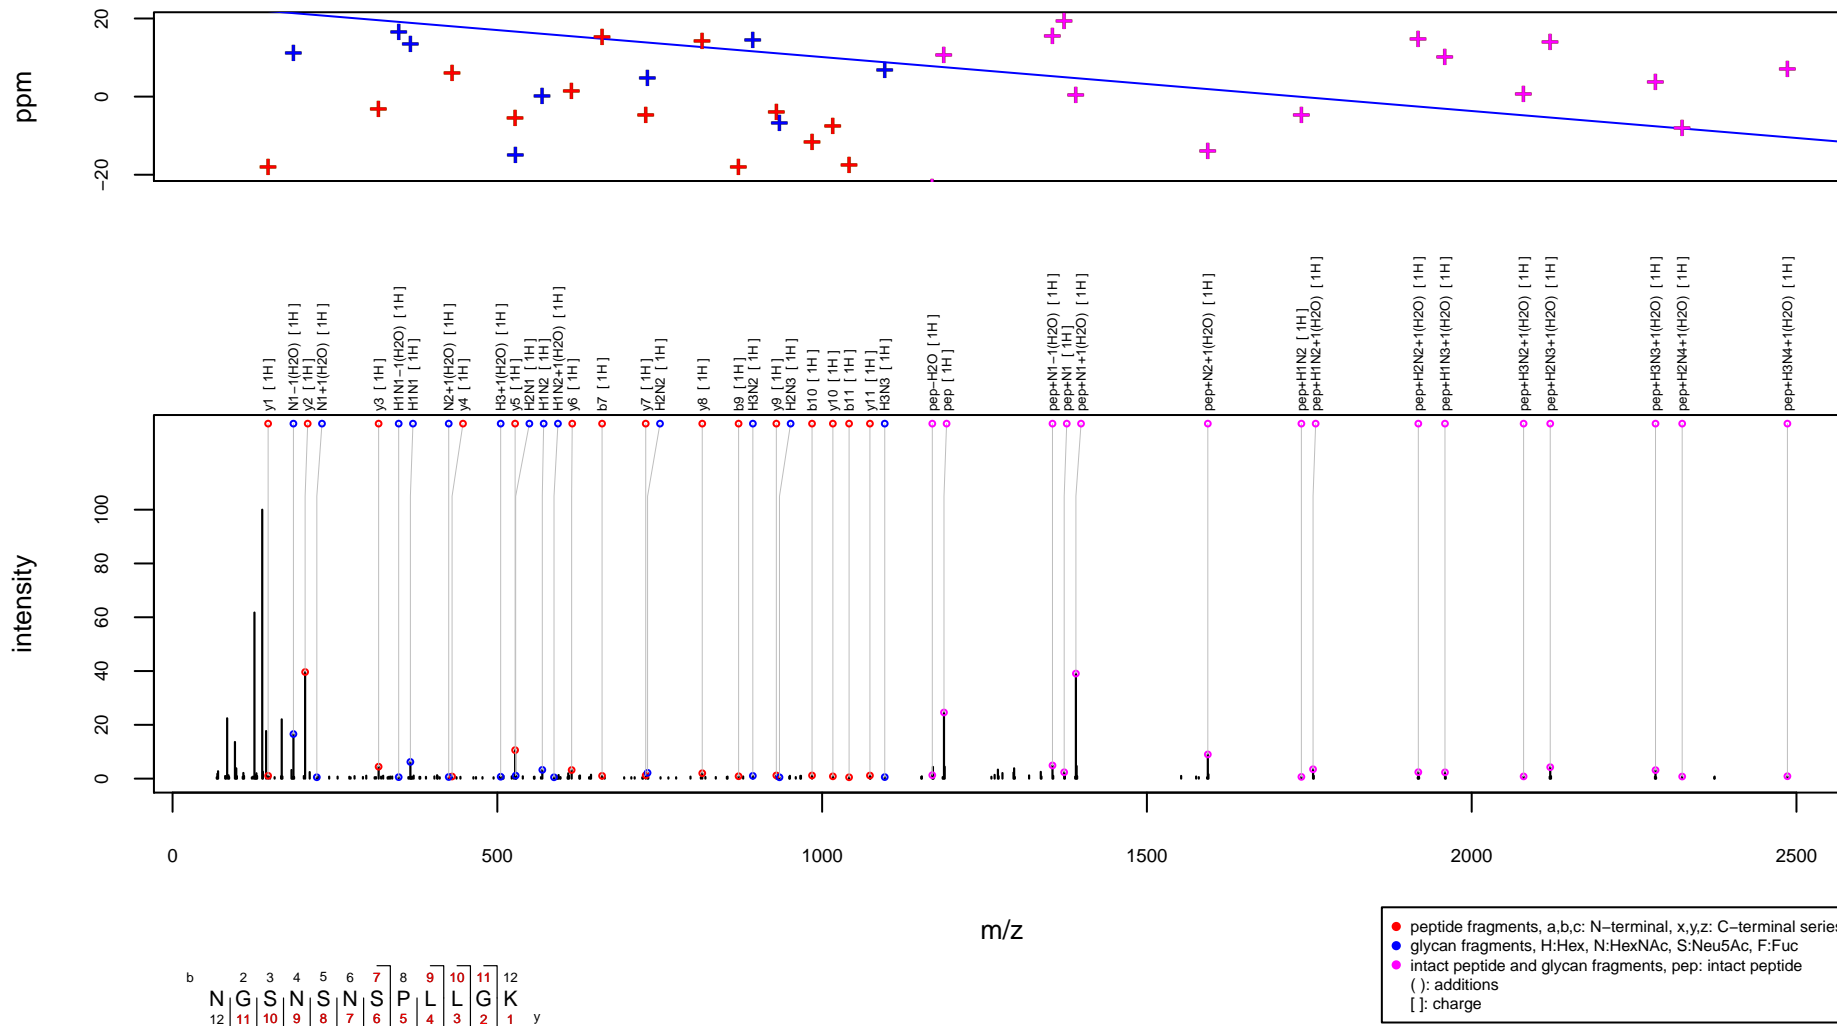

# m/z 957.1561 charge 4 scan 0-0

Score= 76.36 , Hits= 49 , Explained Intensity= 0.42

Peptide: CLUS\_HUMAN[372,385]:LANLTQGEDQYYLR

Glycan: SNNH(NNH)HN(F)N, S1H3N6F1

Charge: 4H

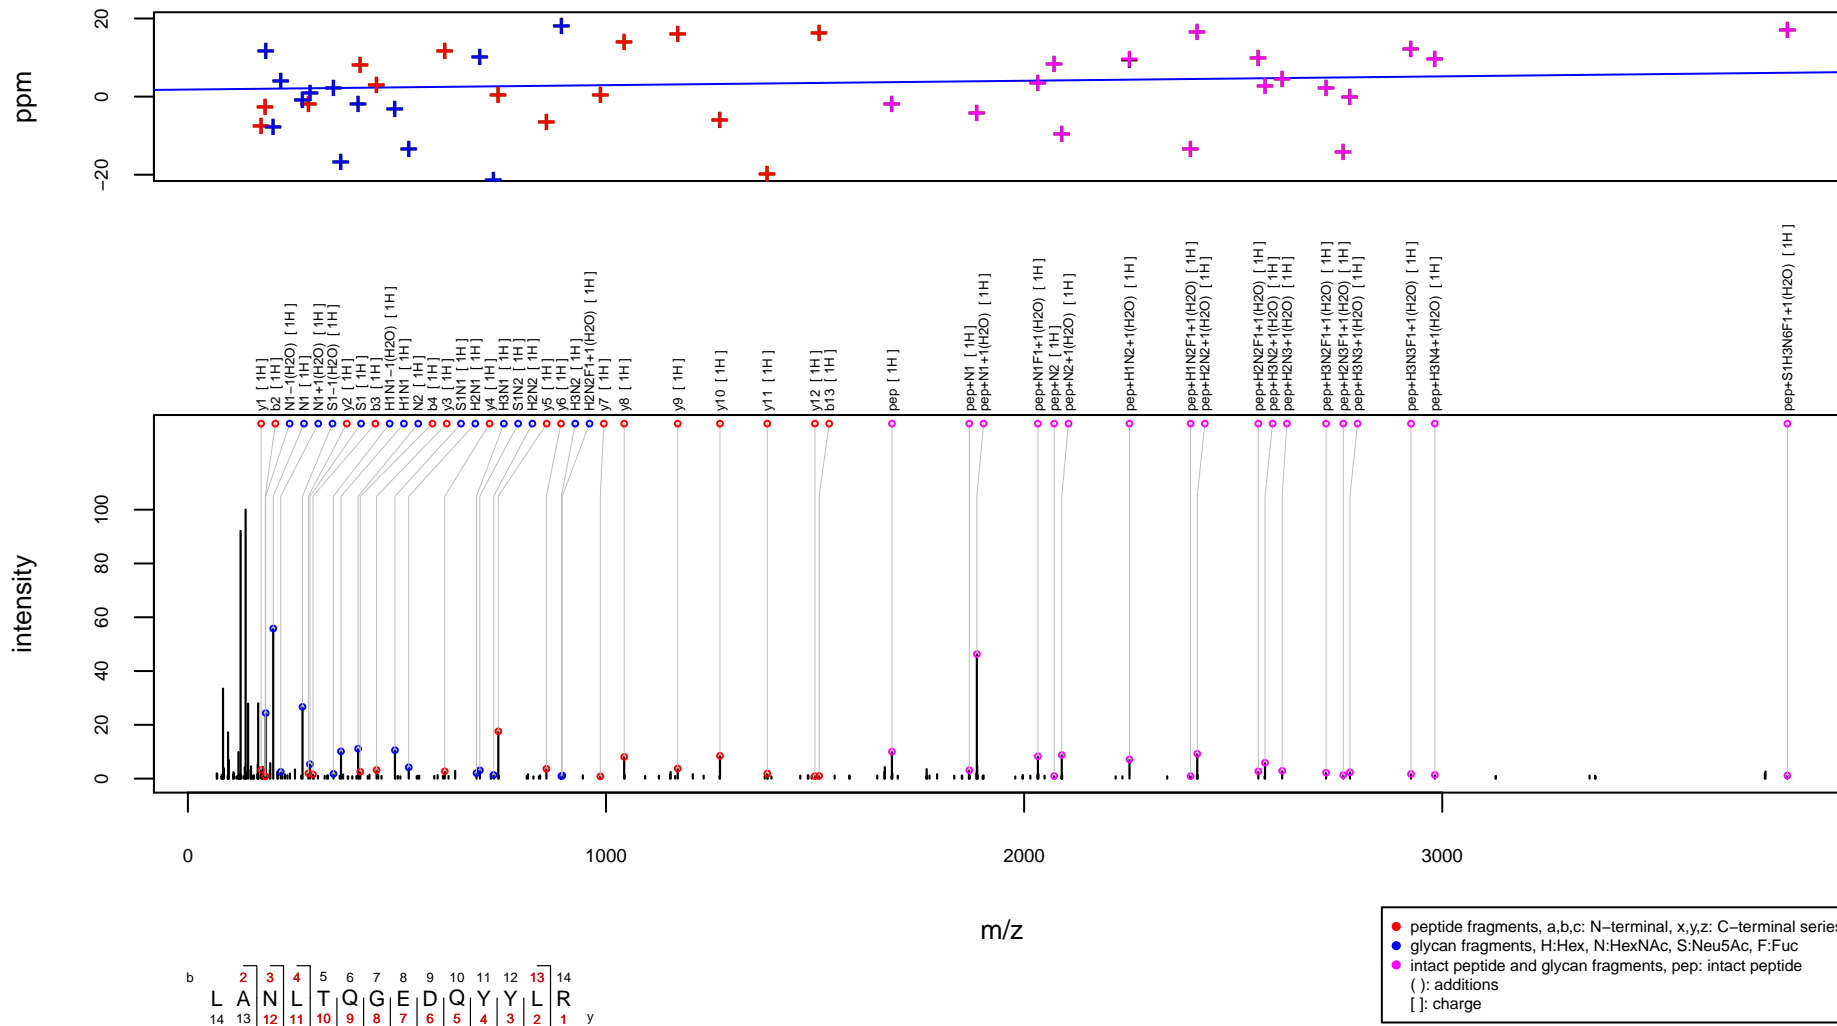

# m/z 831.0299 charge 3 scan 0-0

Score= 56.74 , Hits= 32 , Explained Intensity= 0.29

Peptide: LG3BP\_HUMAN[542,554]:AAIP<sup>3</sup>SALD<sup>3</sup>TNSSK

Glycan: H(H)H(H)HNN, H5N2

Charge: 3H

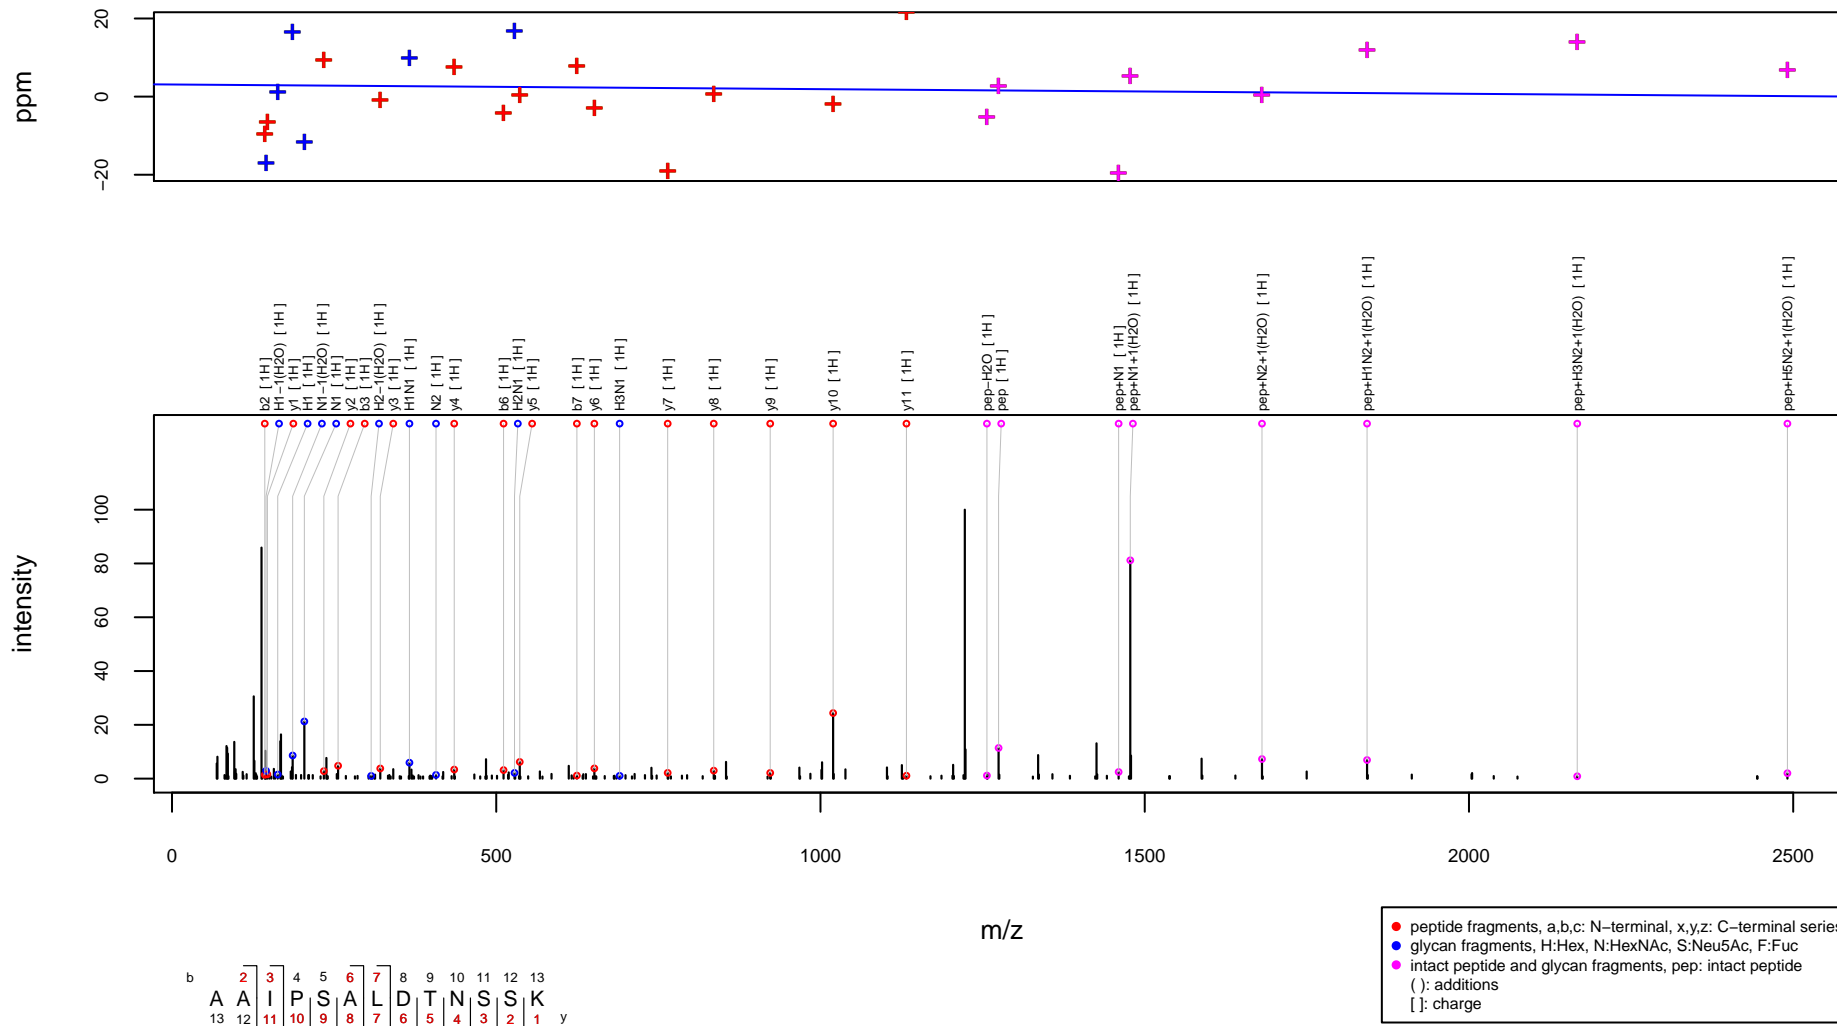

# m/z 842.3589 charge 3 scan 0-0

Score= 52.37 , Hits= 29 , Explained Intensity= 0.25

Peptide: ASAH1\_HUMAN[255,267]:TVLENSTSYEEAK

Glycan: HH(H)HNN, H4N2

Charge: 3H

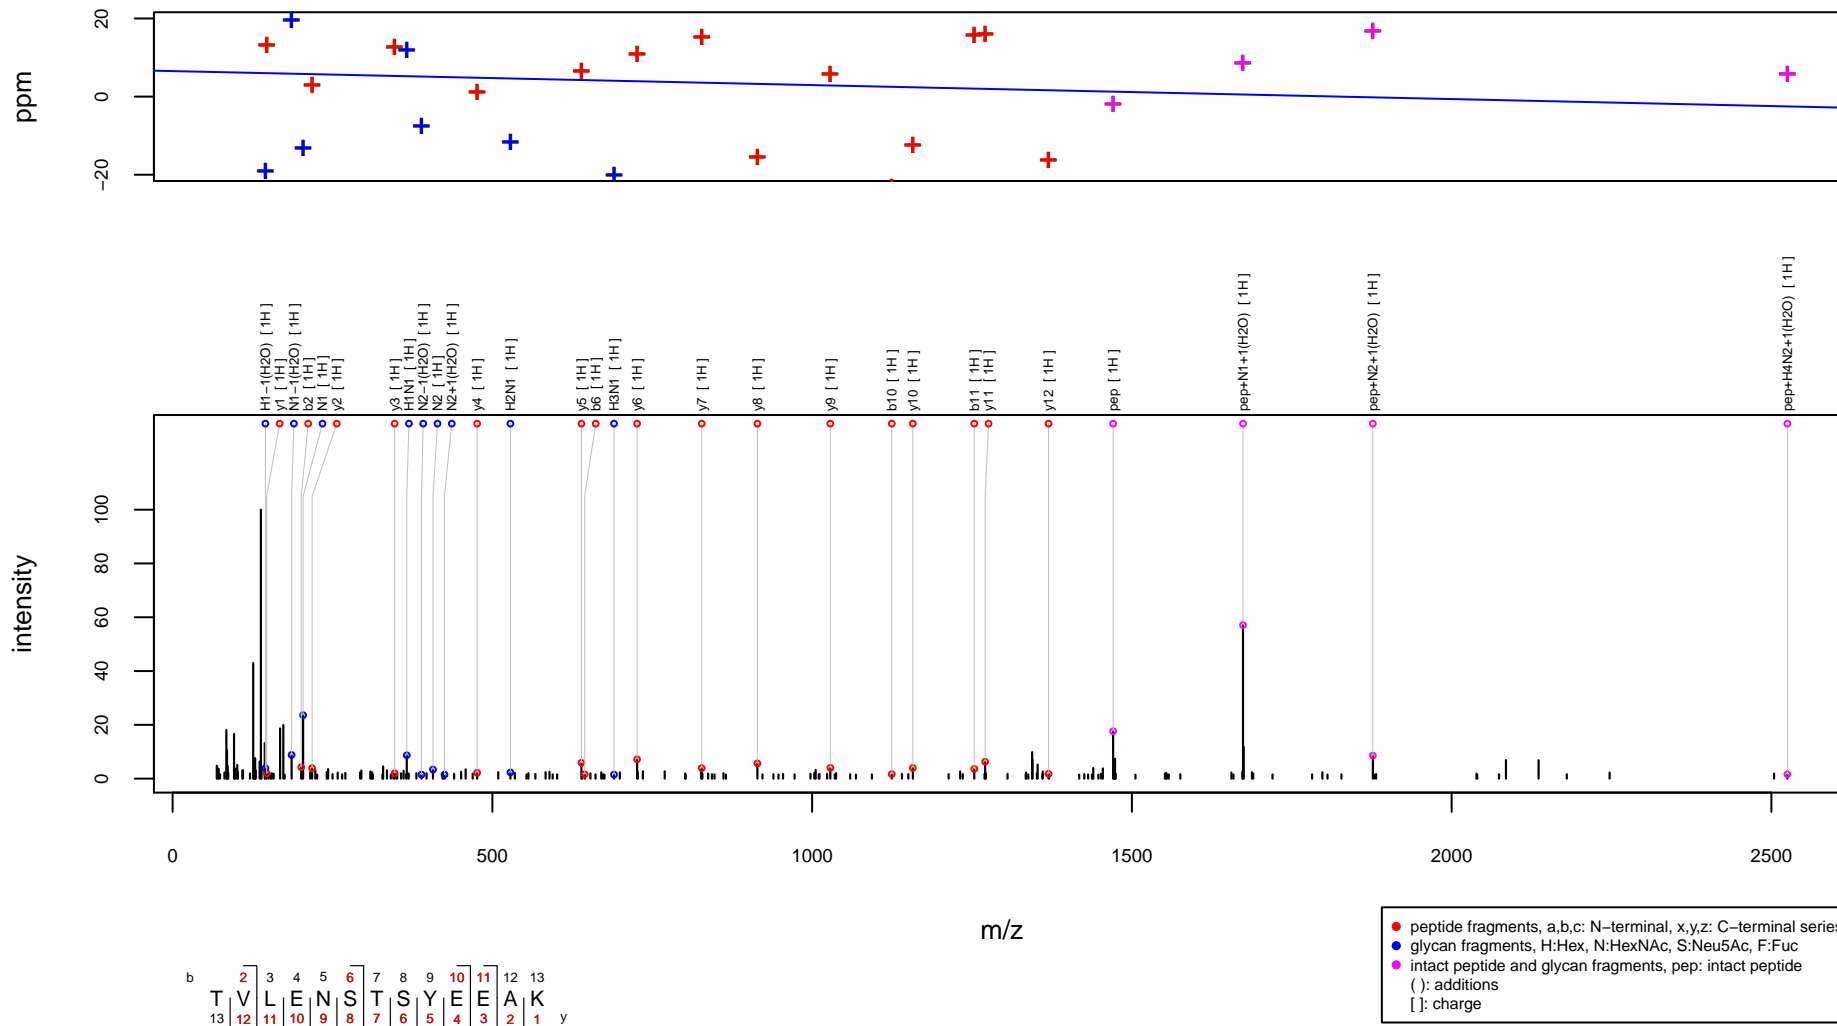

# m/z 1097.9324 charge 4 scan 0-0

Score= 65.11 , Hits= 43 , Explained Intensity= 0.44

Peptide: APOD\_HUMAN[61,73]:CIQANYSLMENGK

Glycan: SHNH(SHN(SHN)H)HNN, S3H6N5

Charge: 4H

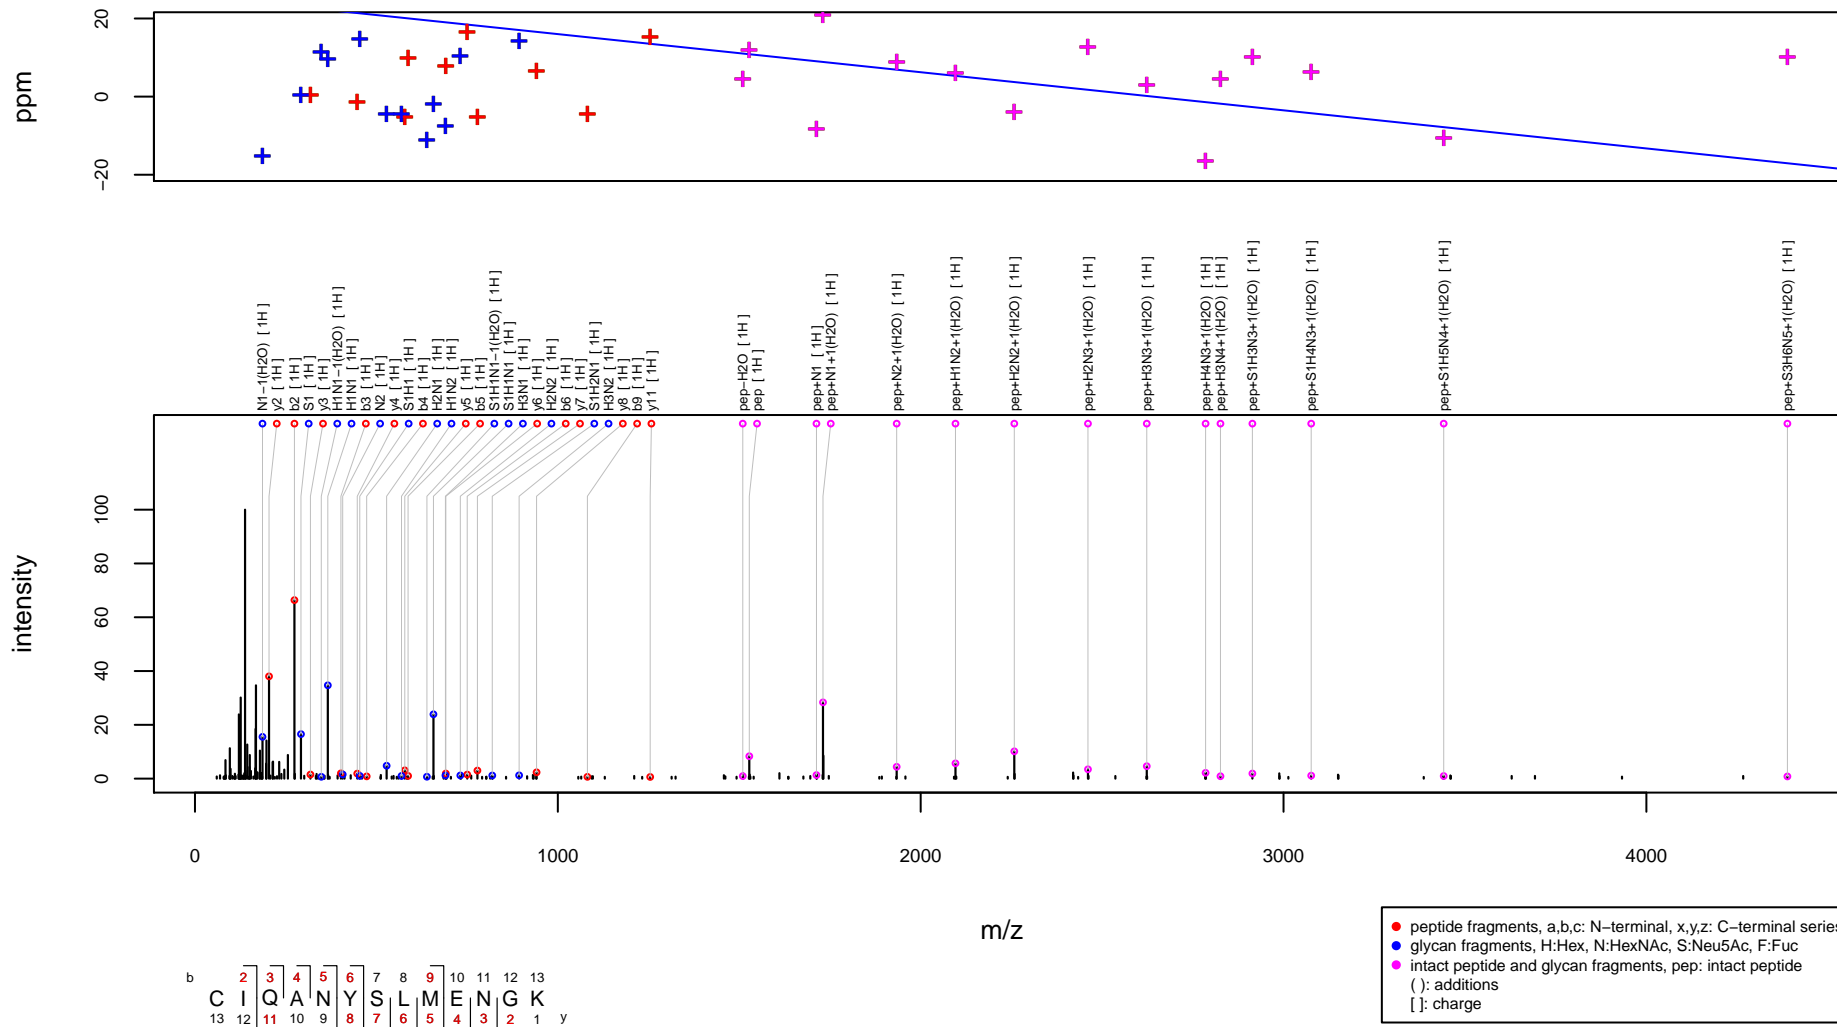



# m/z 999.7589 charge 3 scan 0-0

Score= 73.85 , Hits= 50 , Explained Intensity= 0.39

Peptide: CUBN\_HUMAN[3457,3468]:NGSNSNSPLL GK

Glycan: H4N5F1

Charge: 3H

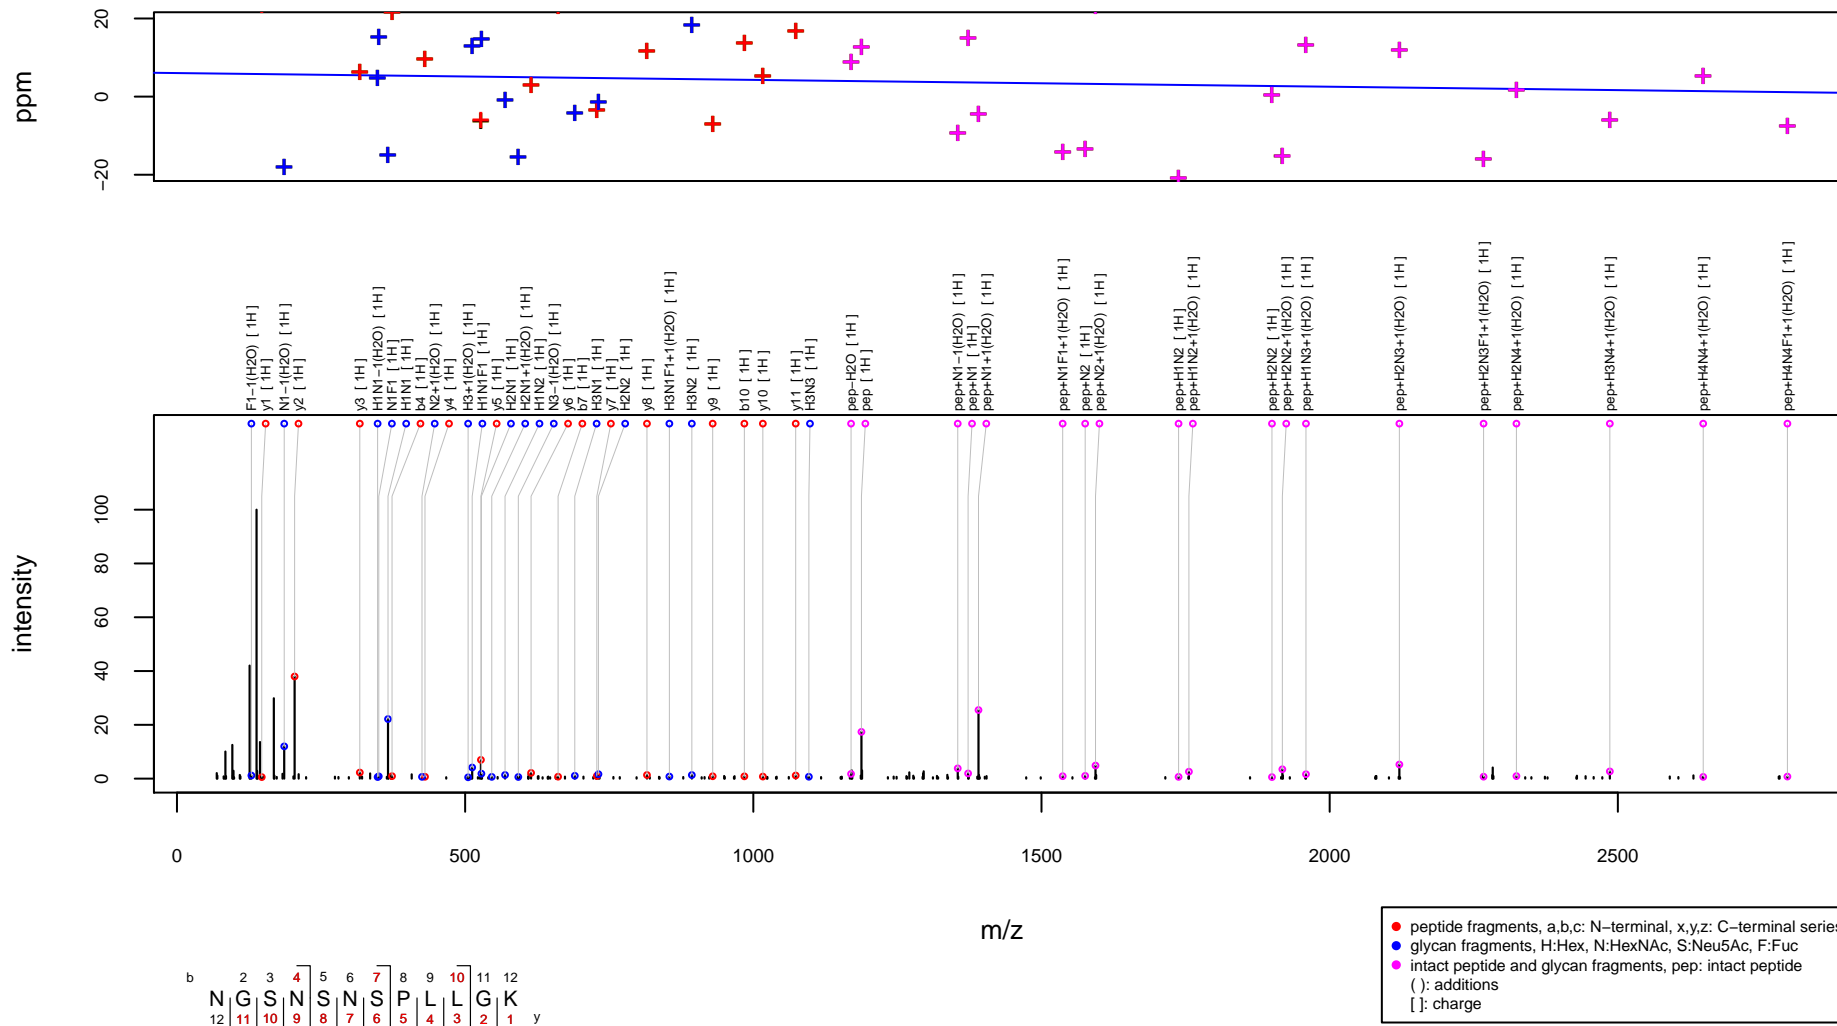



# m/z 1155.495 charge 3 scan 0-0

Score= 85.96 , Hits= 50 , Explained Intensity= 0.55

Peptide: VASN\_HUMAN[112,121]:LHEITNETFR

Glycan: SHNH(SHNH)HNN, S2H5N4

Charge: 3H

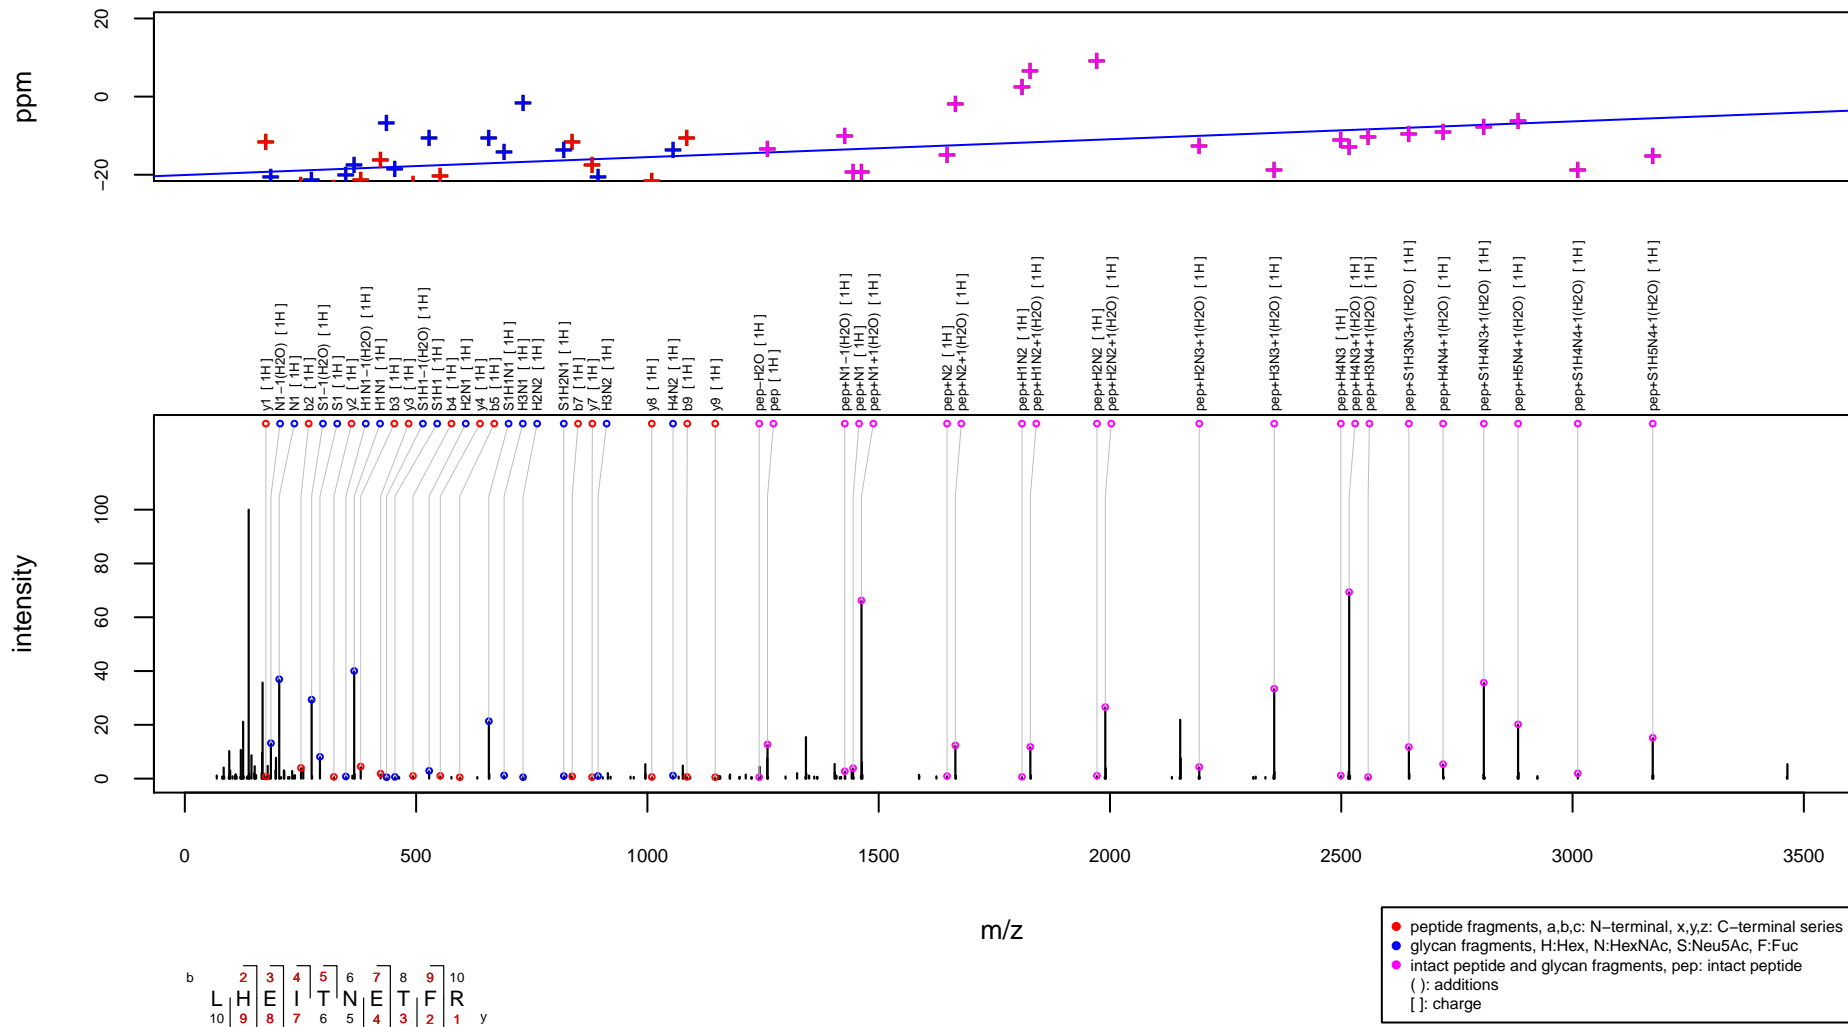

# m/z 845.6984 charge 3 scan 0-0

Score= 65.17 , Hits= 36 , Explained Intensity= 0.5

Peptide: ATRN\_HUMAN[411,422]:IDSTGNVTNELR

Glycan: H(H)H(H)HNN, H5N2

Charge: 3H

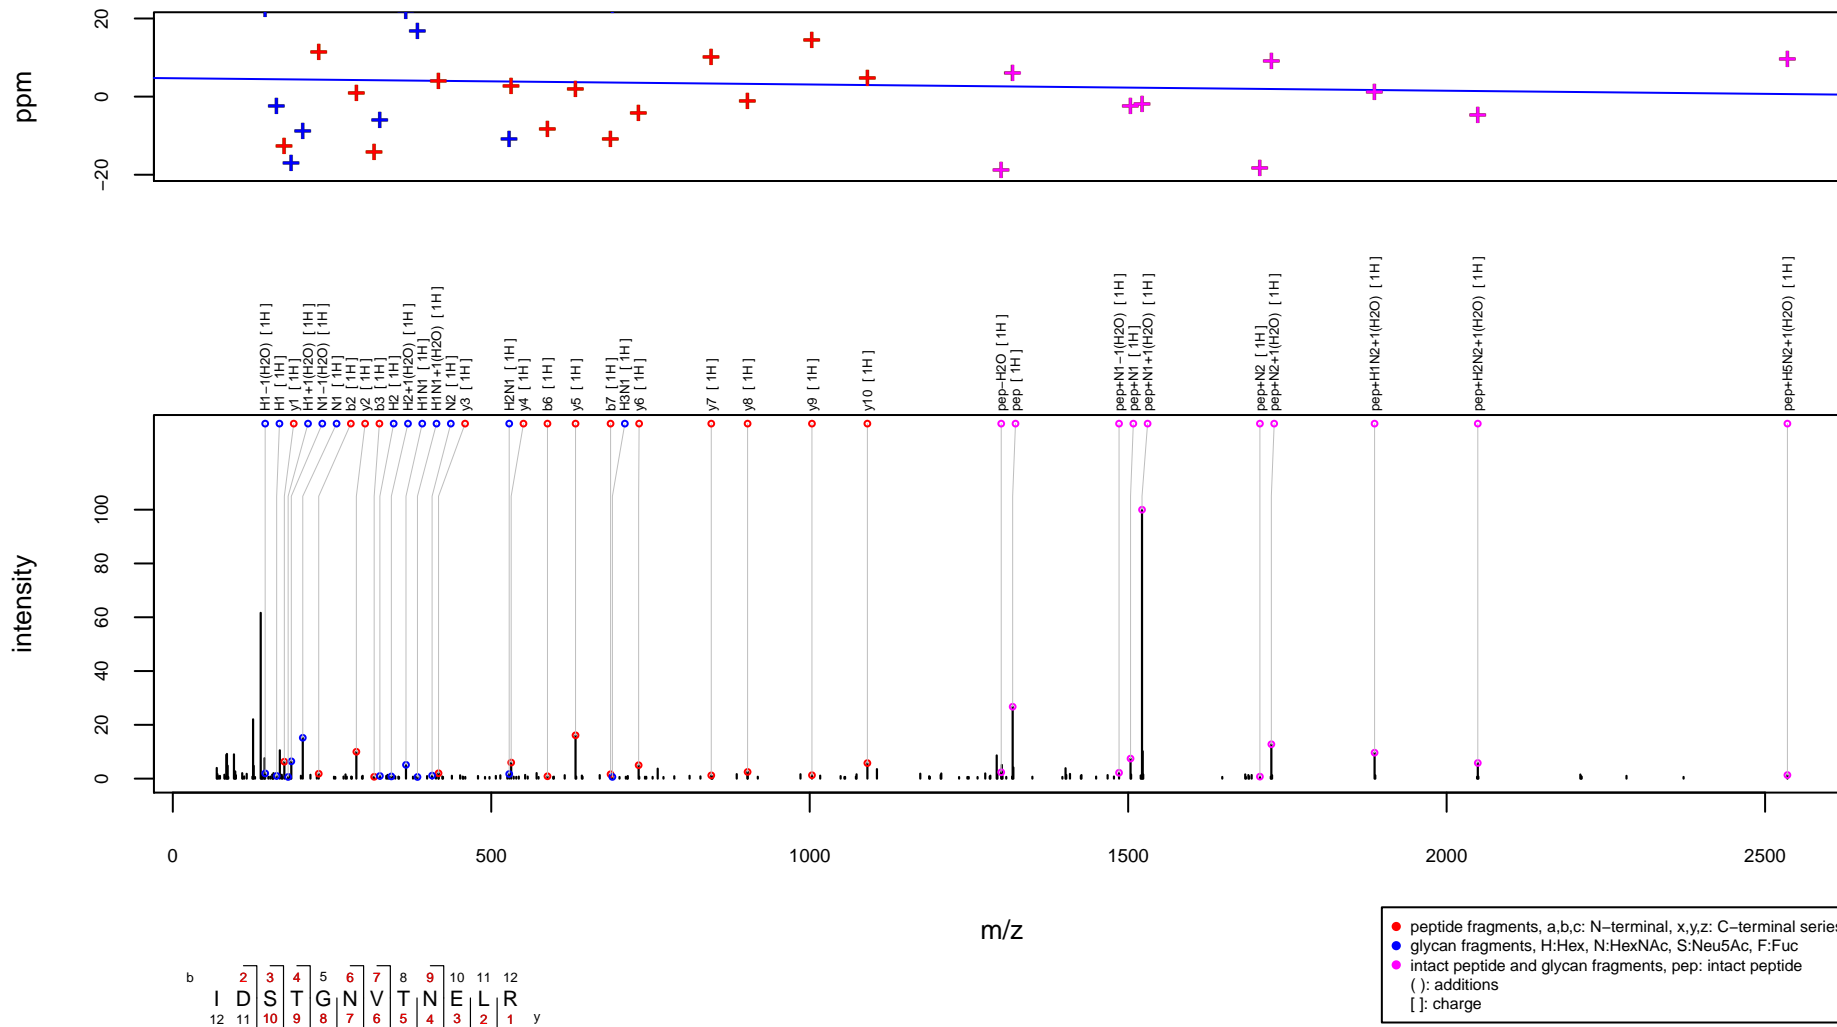

# m/z 944.1437 charge 4 scan 0-0

Score= 62.05 , Hits= 44 , Explained Intensity= 0.29  
 Peptide: LG3BP\_HUMAN[542,554]:AAIPSAALDTNSSK  
 Glycan: HN(HN)H(HN(HN)H)HN(F)N, H7N6F1  
 Charge: 4H

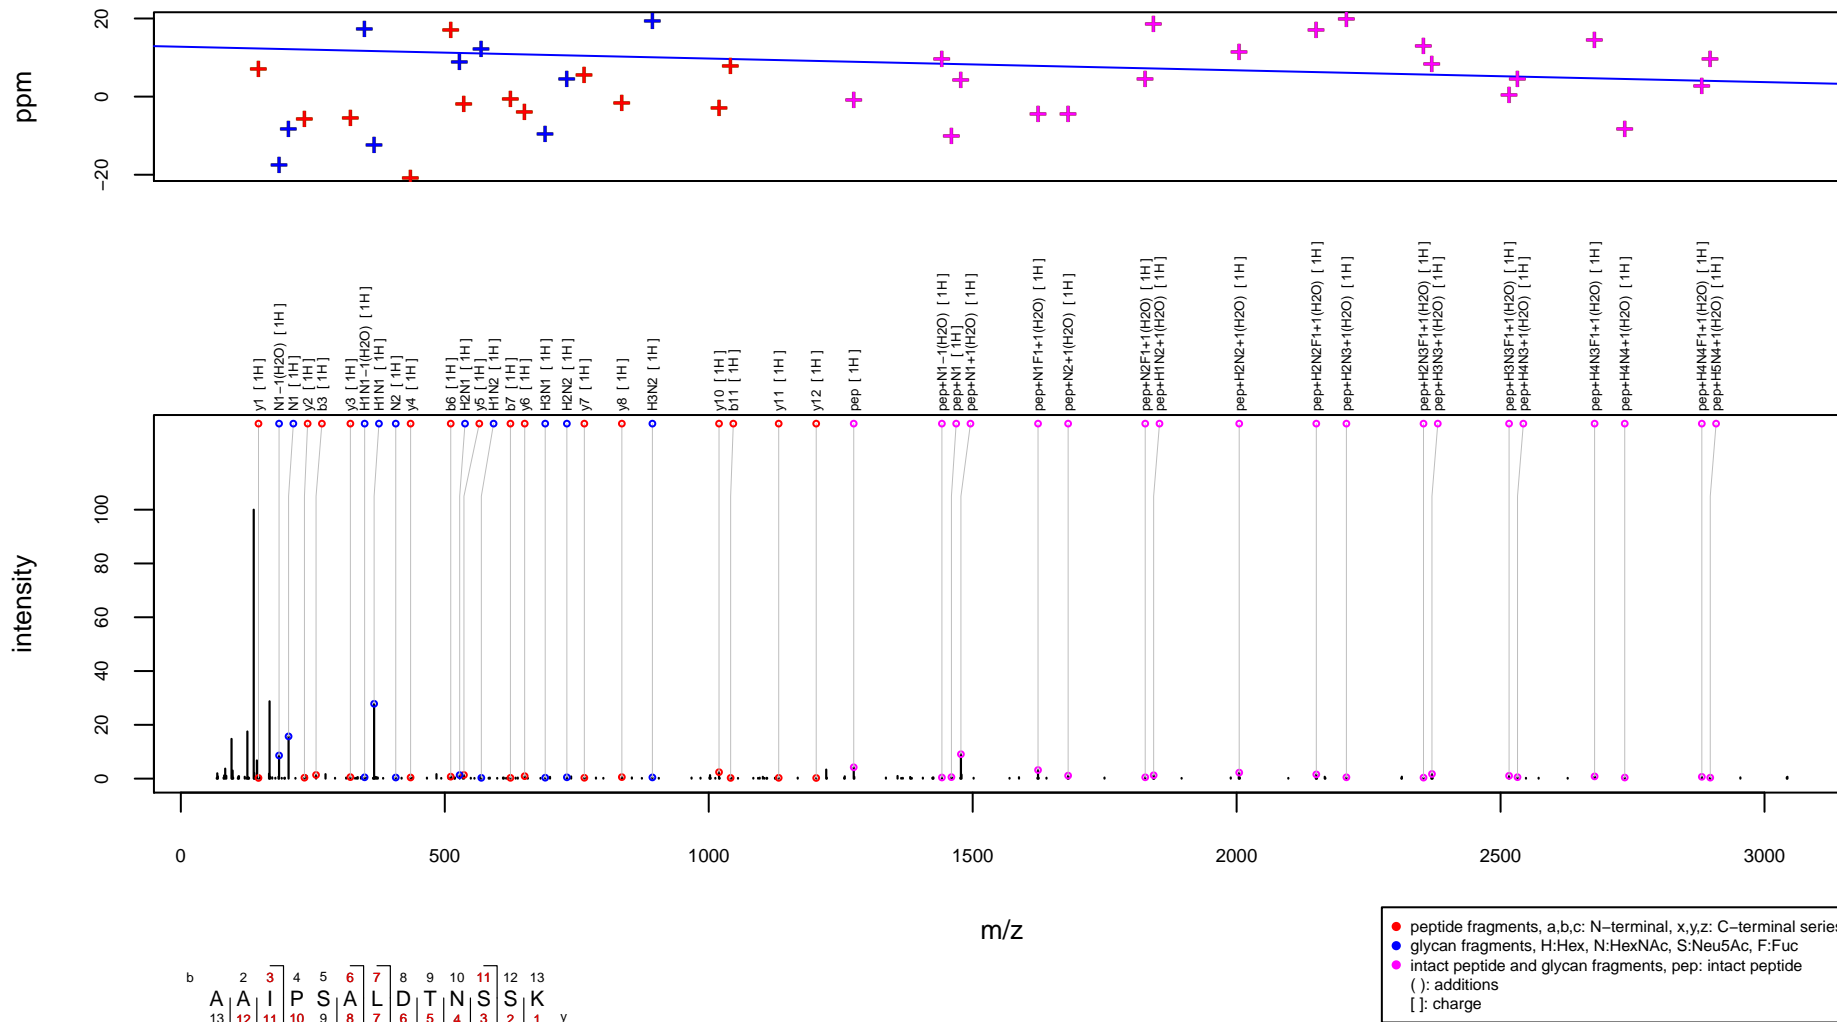

# m/z 1015.101 charge 3 scan 0-0

Score= 74.82 , Hits= 47 , Explained Intensity= 0.38

Peptide: LG3BP\_HUMAN[542,554]:AAIPSAALDTNSK

Glycan: HNH(HNH)HN(F)N, H5N4F1

Charge: 3H

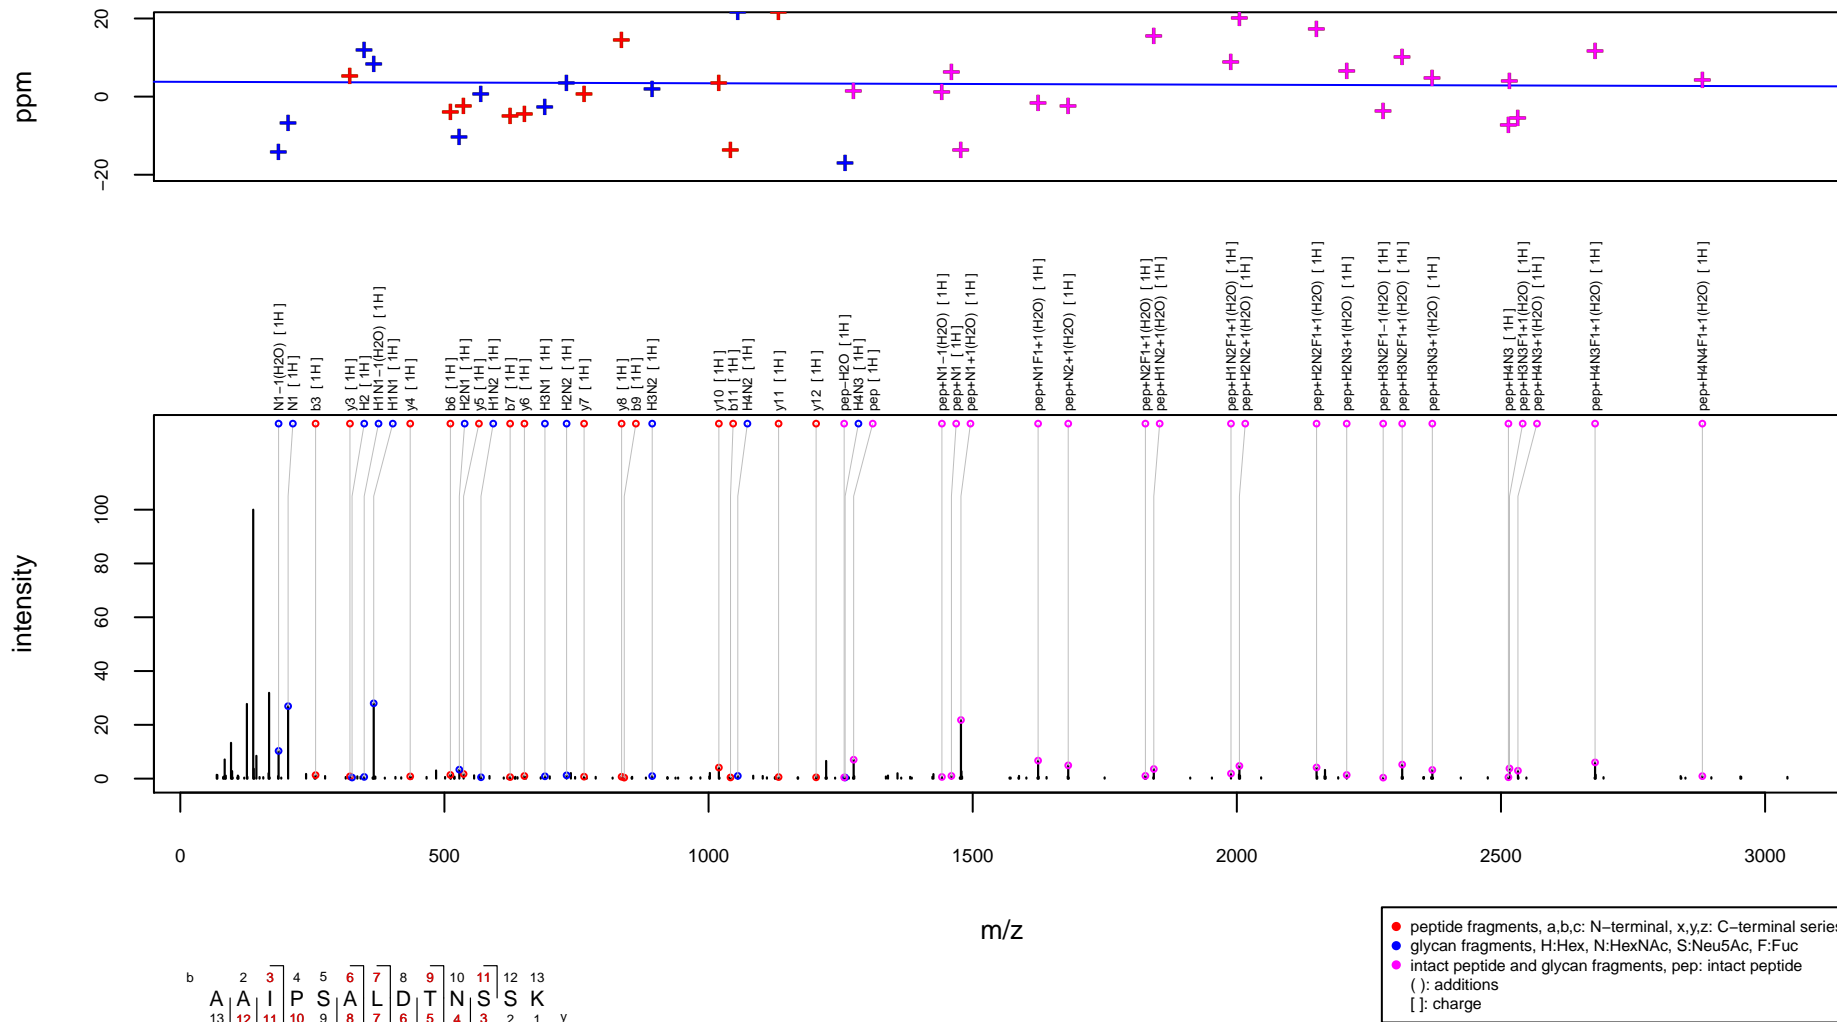

# m/z 907.0682 charge 3 scan 0-0

Score= 81.76 , Hits= 50 , Explained Intensity= 0.34

Peptide: LG3BP\_HUMAN[542,554]:AAIPSAALDITNSISK

Glycan: NH(N)(H)HN(F)N, H3N4F1

Charge: 3H

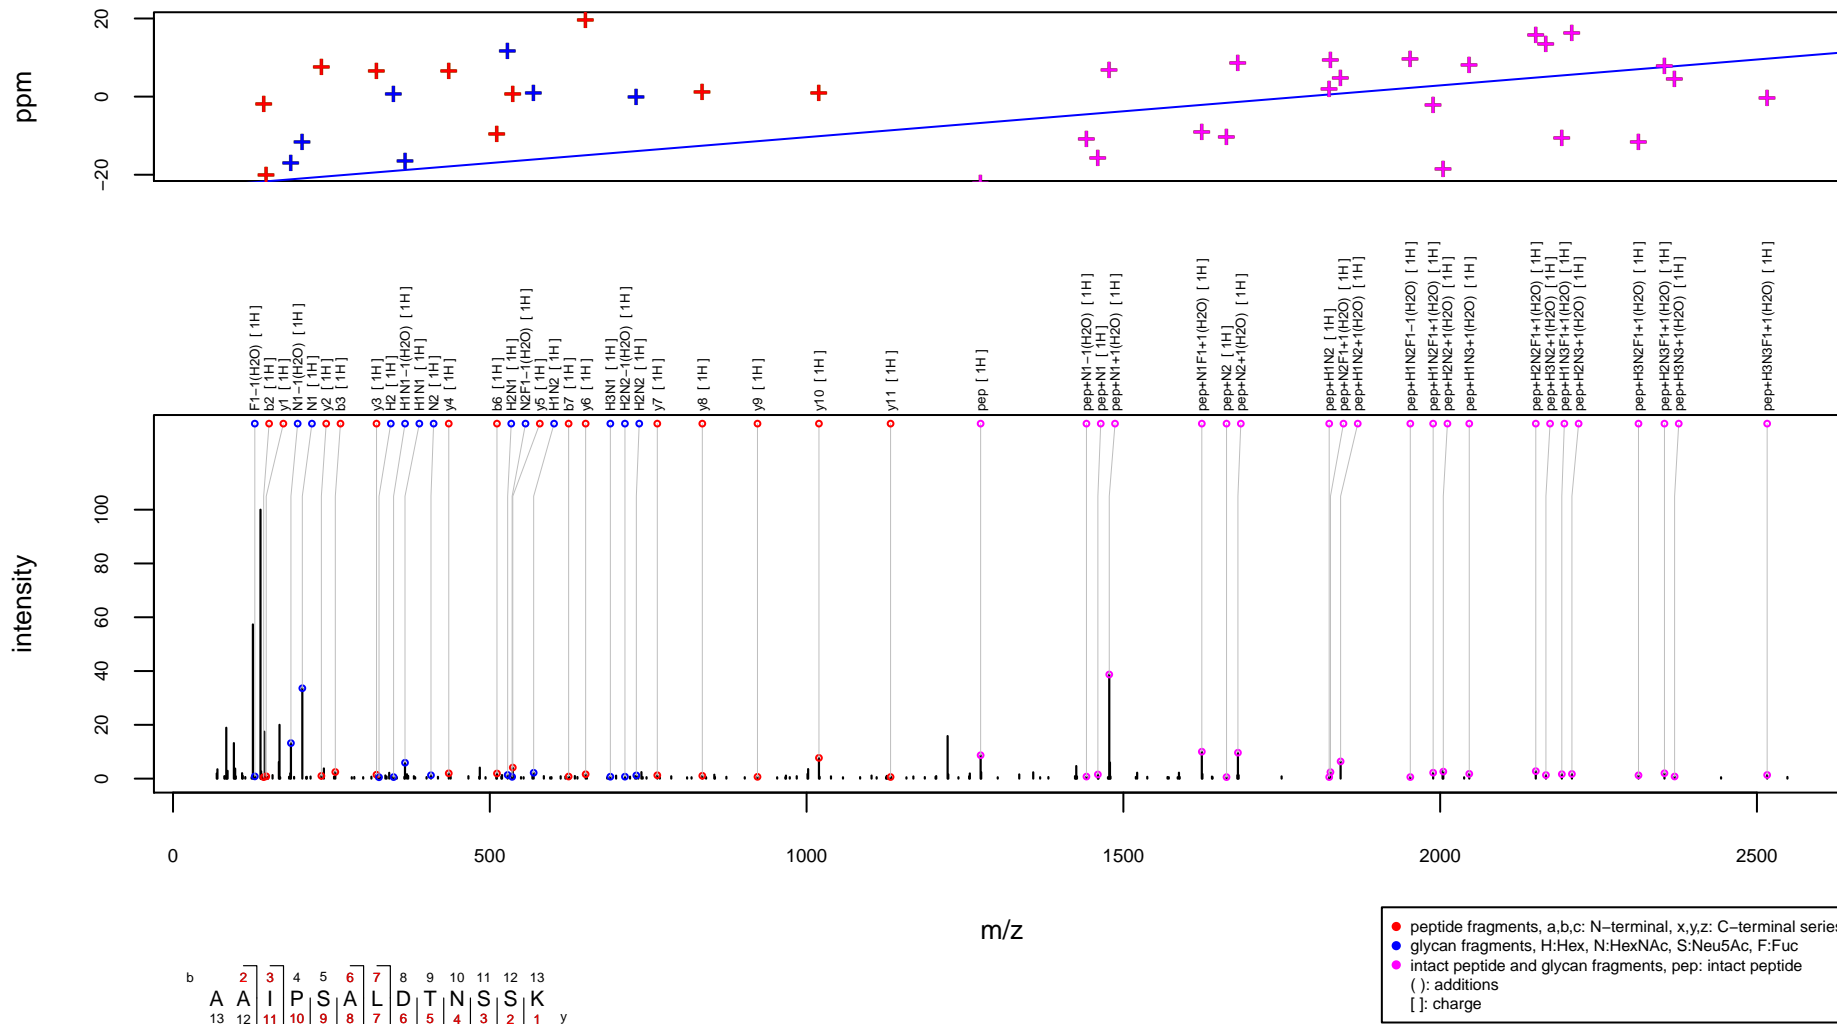

# m/z 972.3946 charge 3 scan 0-0

Score= 67.03 , Hits= 40 , Explained Intensity= 0.4

Peptide: NEP\_HUMAN[142,152]:SCINESAIDSR

Glycan: H4N5

Charge: 3H

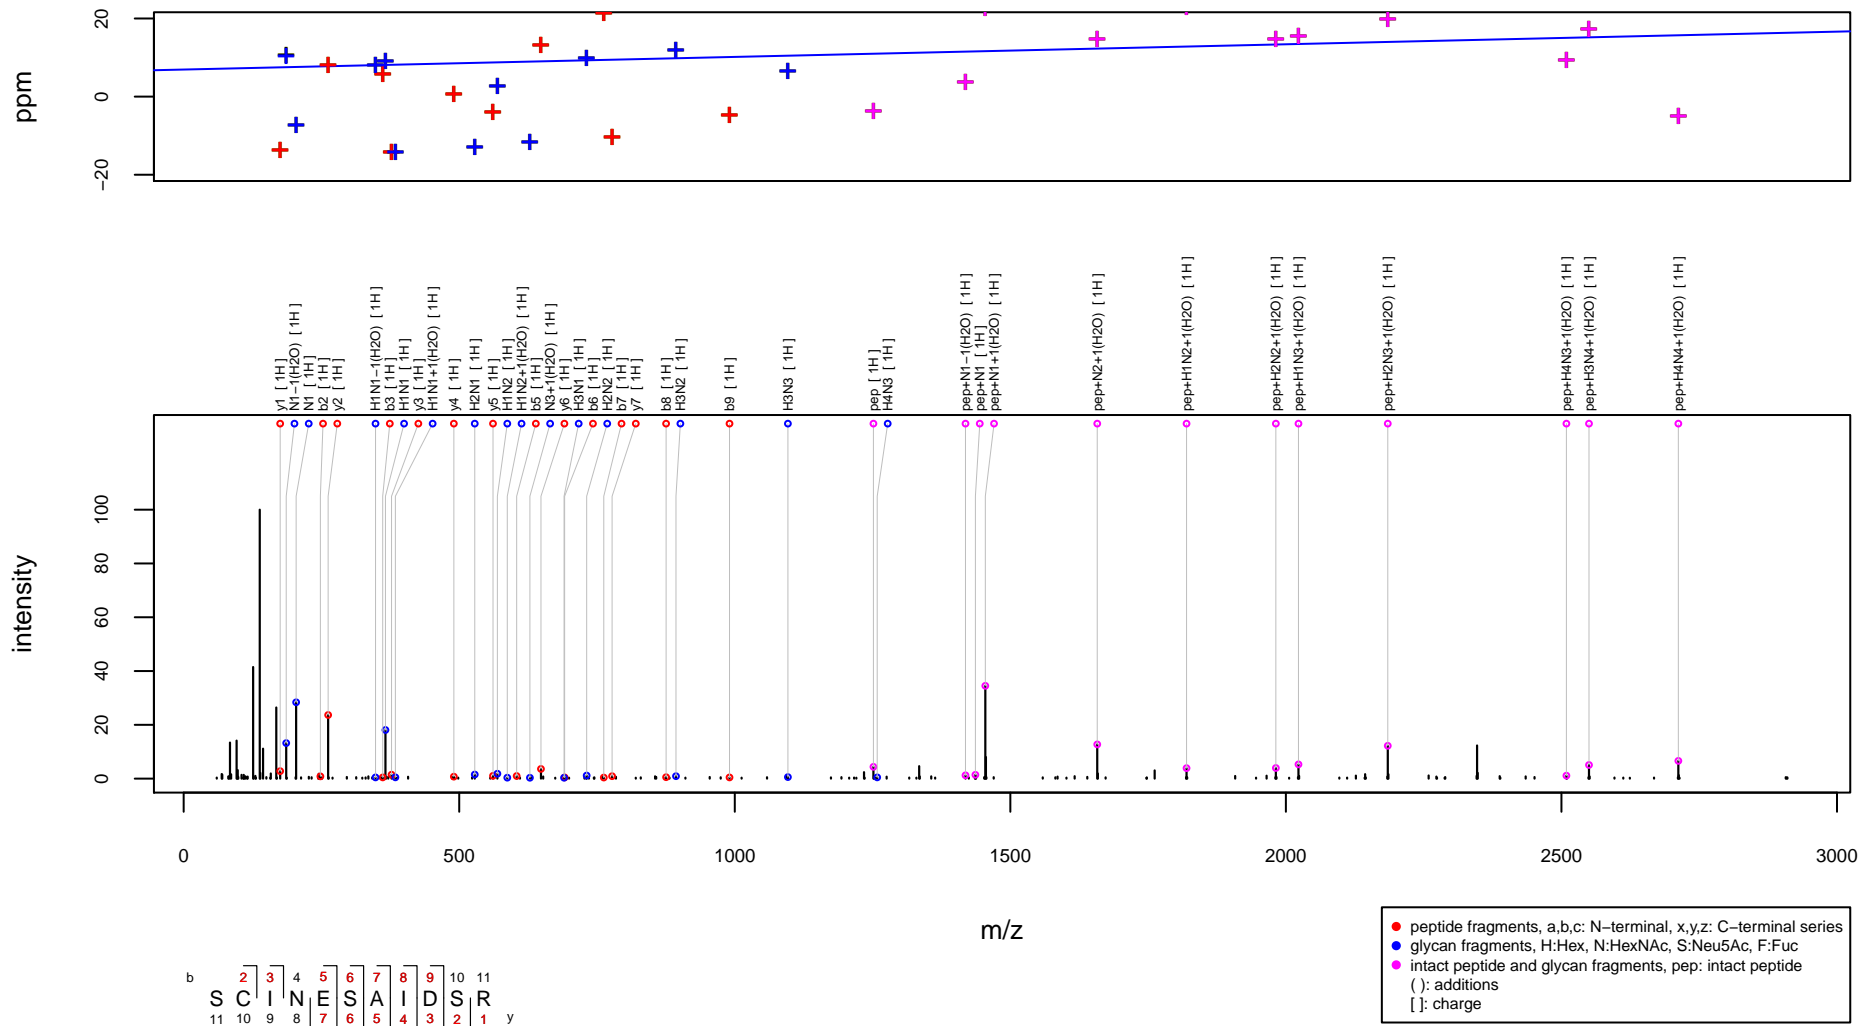

# m/z 1006.767 charge 3 scan 0-0

Score= 75.78 , Hits= 50 , Explained Intensity= 0.41

Peptide: IGHA2\_HUMAN[200,208]:TPLTANITK

Glycan: SHNH(HNH)HN(F)N, S1H5N4F1

Charge: 3H

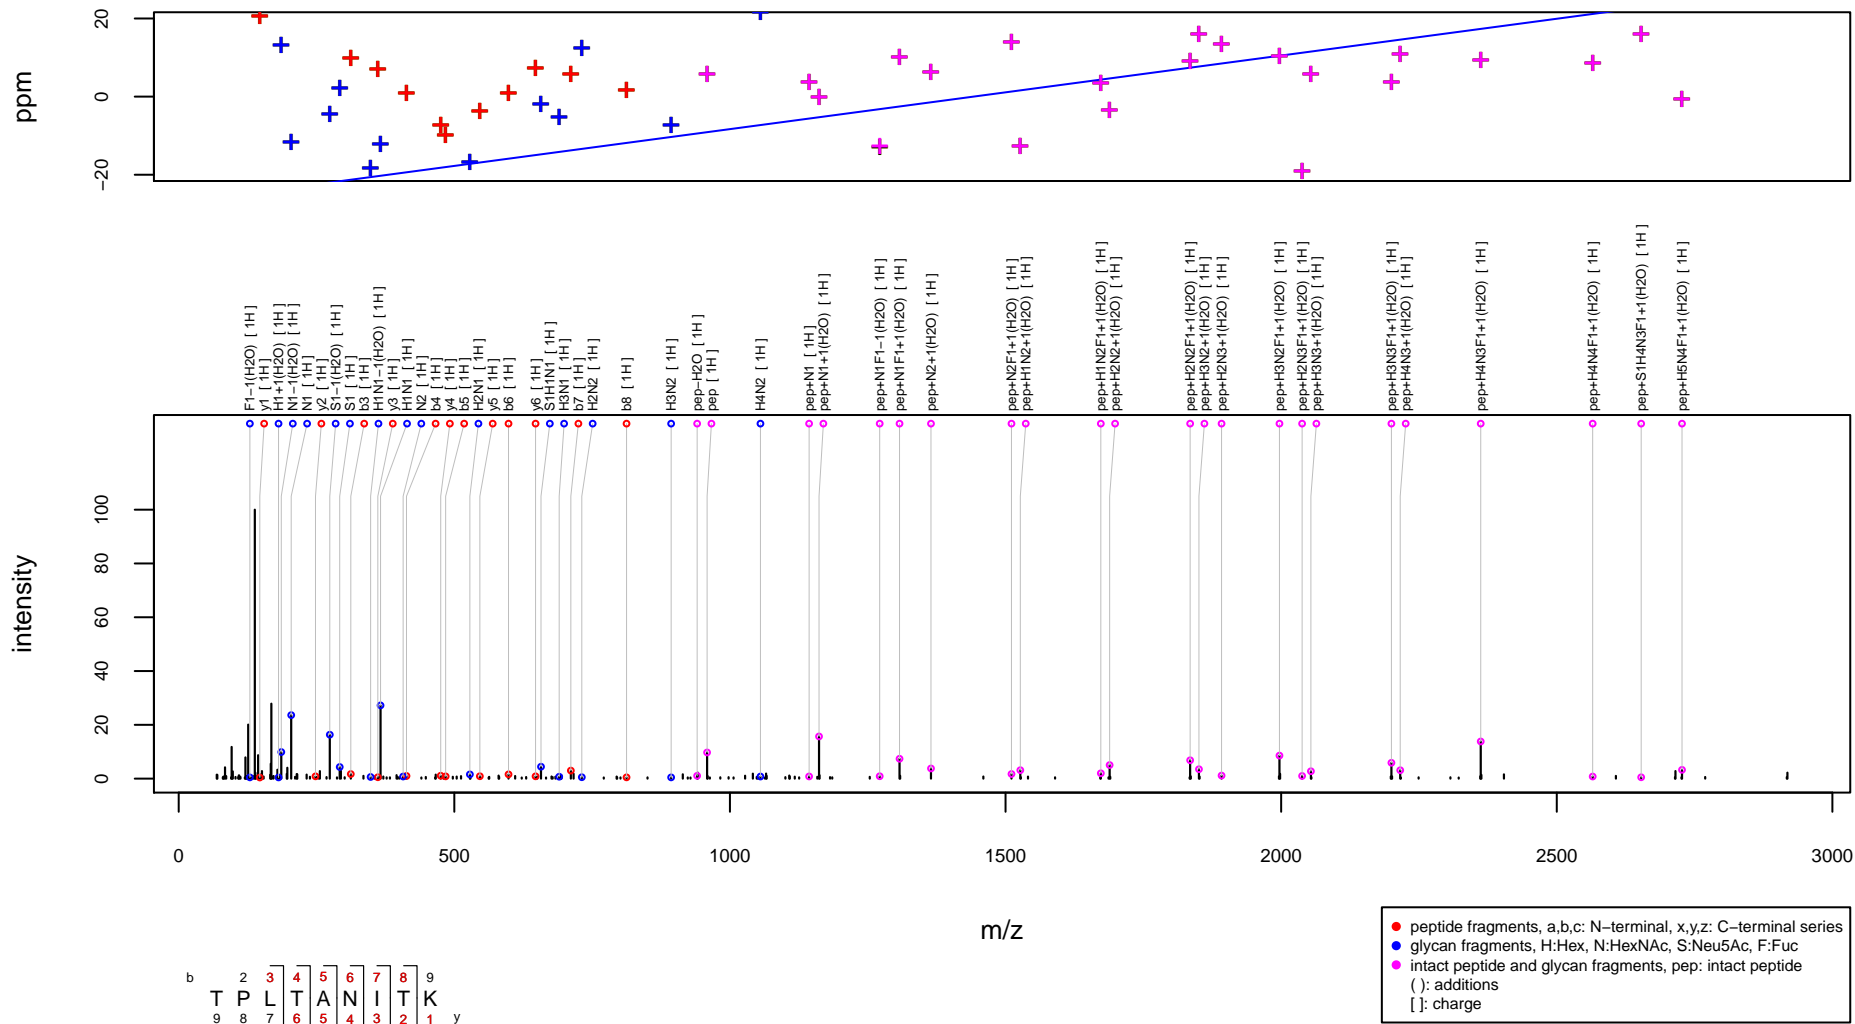

# m/z 977.4273 charge 3 scan 0-0

Score= 75.04 , Hits= 49 , Explained Intensity= 0.37

Peptide: IGHA2\_HUMAN[200,208]:TPLTANITK

Glycan: HNH(HNH)(N)HN(F)N, H5N5F1

Charge: 3H

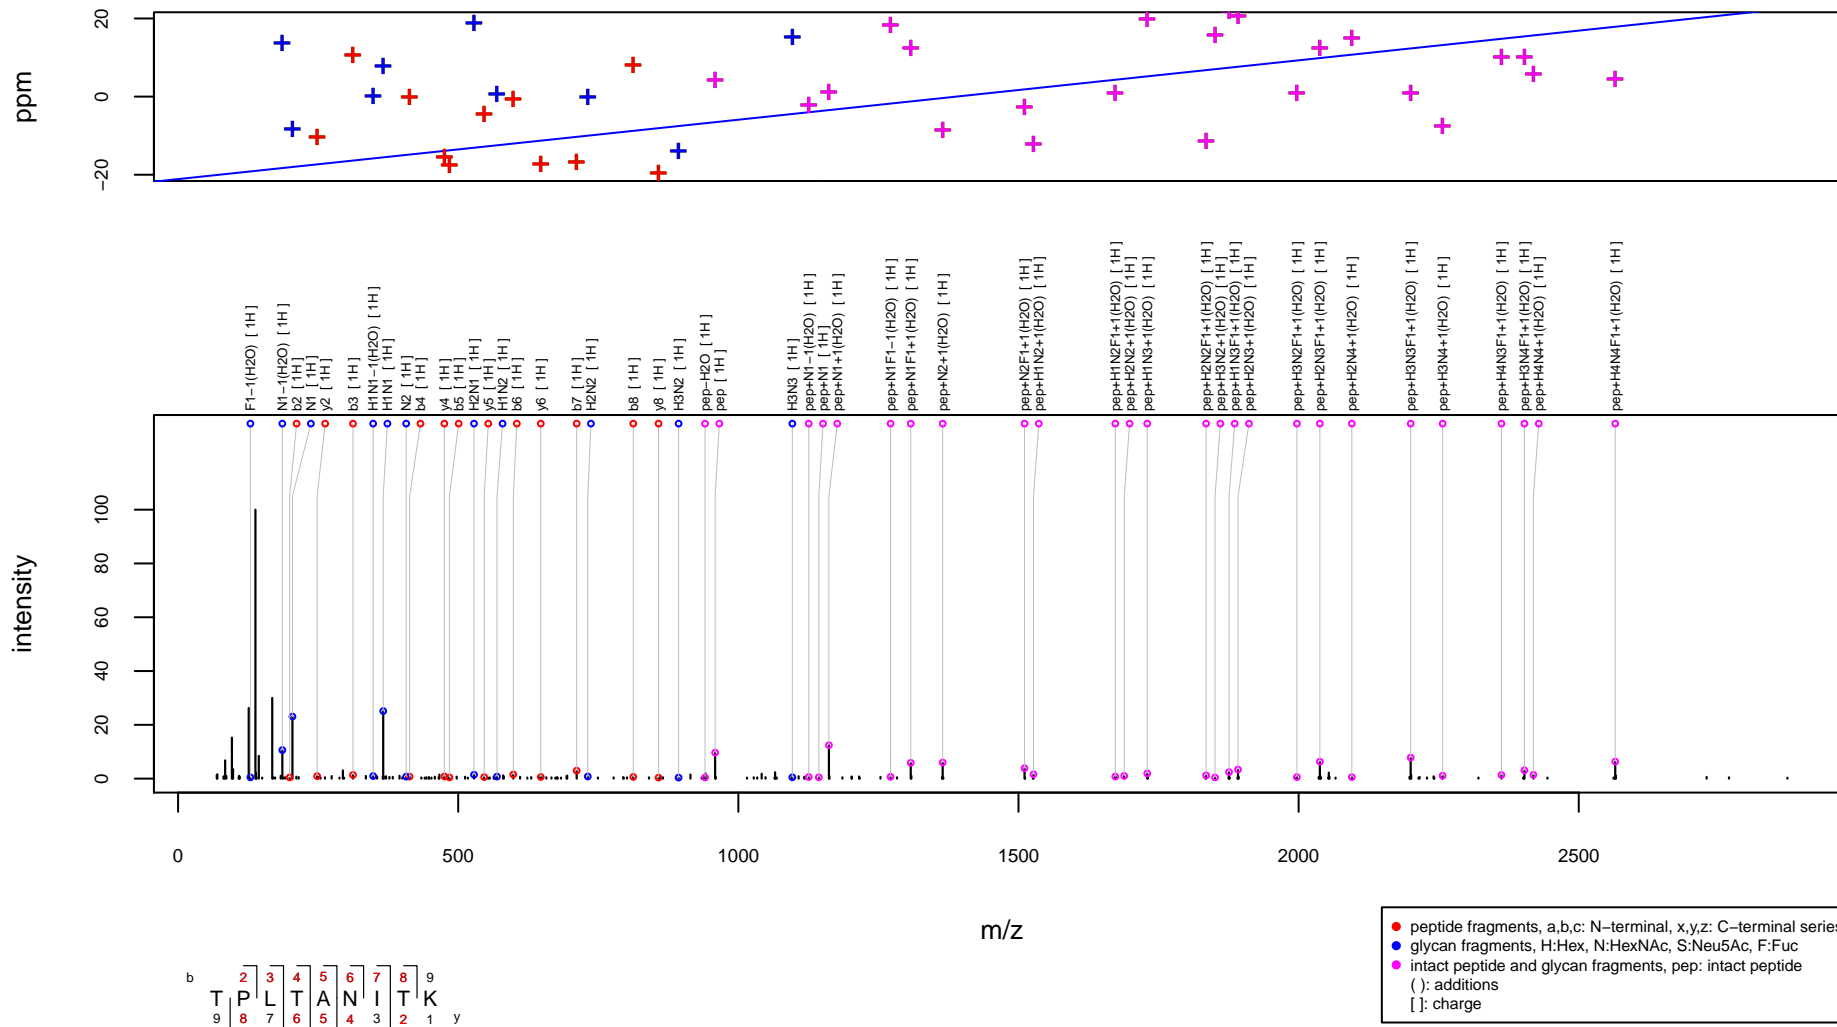



# m/z 916.3778 charge 3 scan 0-0

Score= 74.75 , Hits= 46 , Explained Intensity= 0.42

Peptide: CUBN\_HUMAN[2082,2090]:AGFNASFHK

Glycan: HNH(HNH)HN(F)N, H5N4F1

Charge: 3H

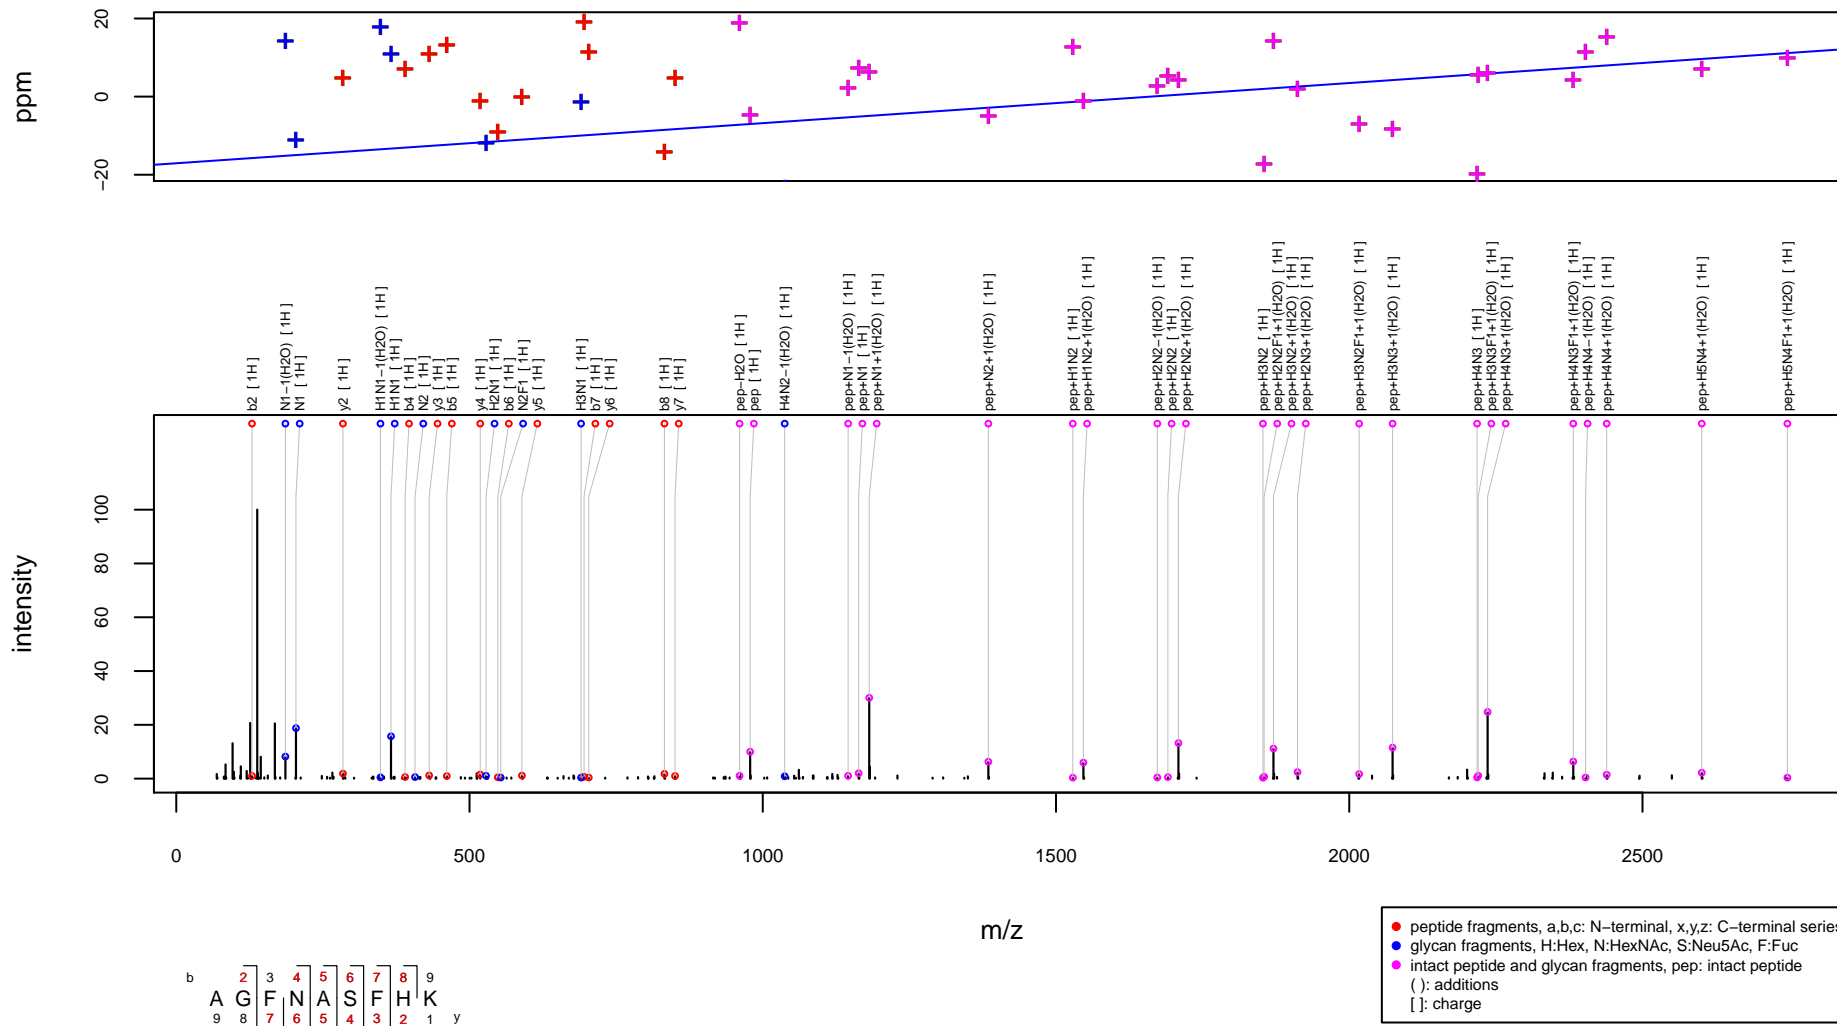

# m/z 1121.4678 charge 3 scan 0-0

Score= 88.03 , Hits= 63 , Explained Intensity= 0.5

Peptide: CUBN\_HUMAN[3457,3468]:NGSNSNSPLL GK

Glycan: H5N6F1

Charge: 3H

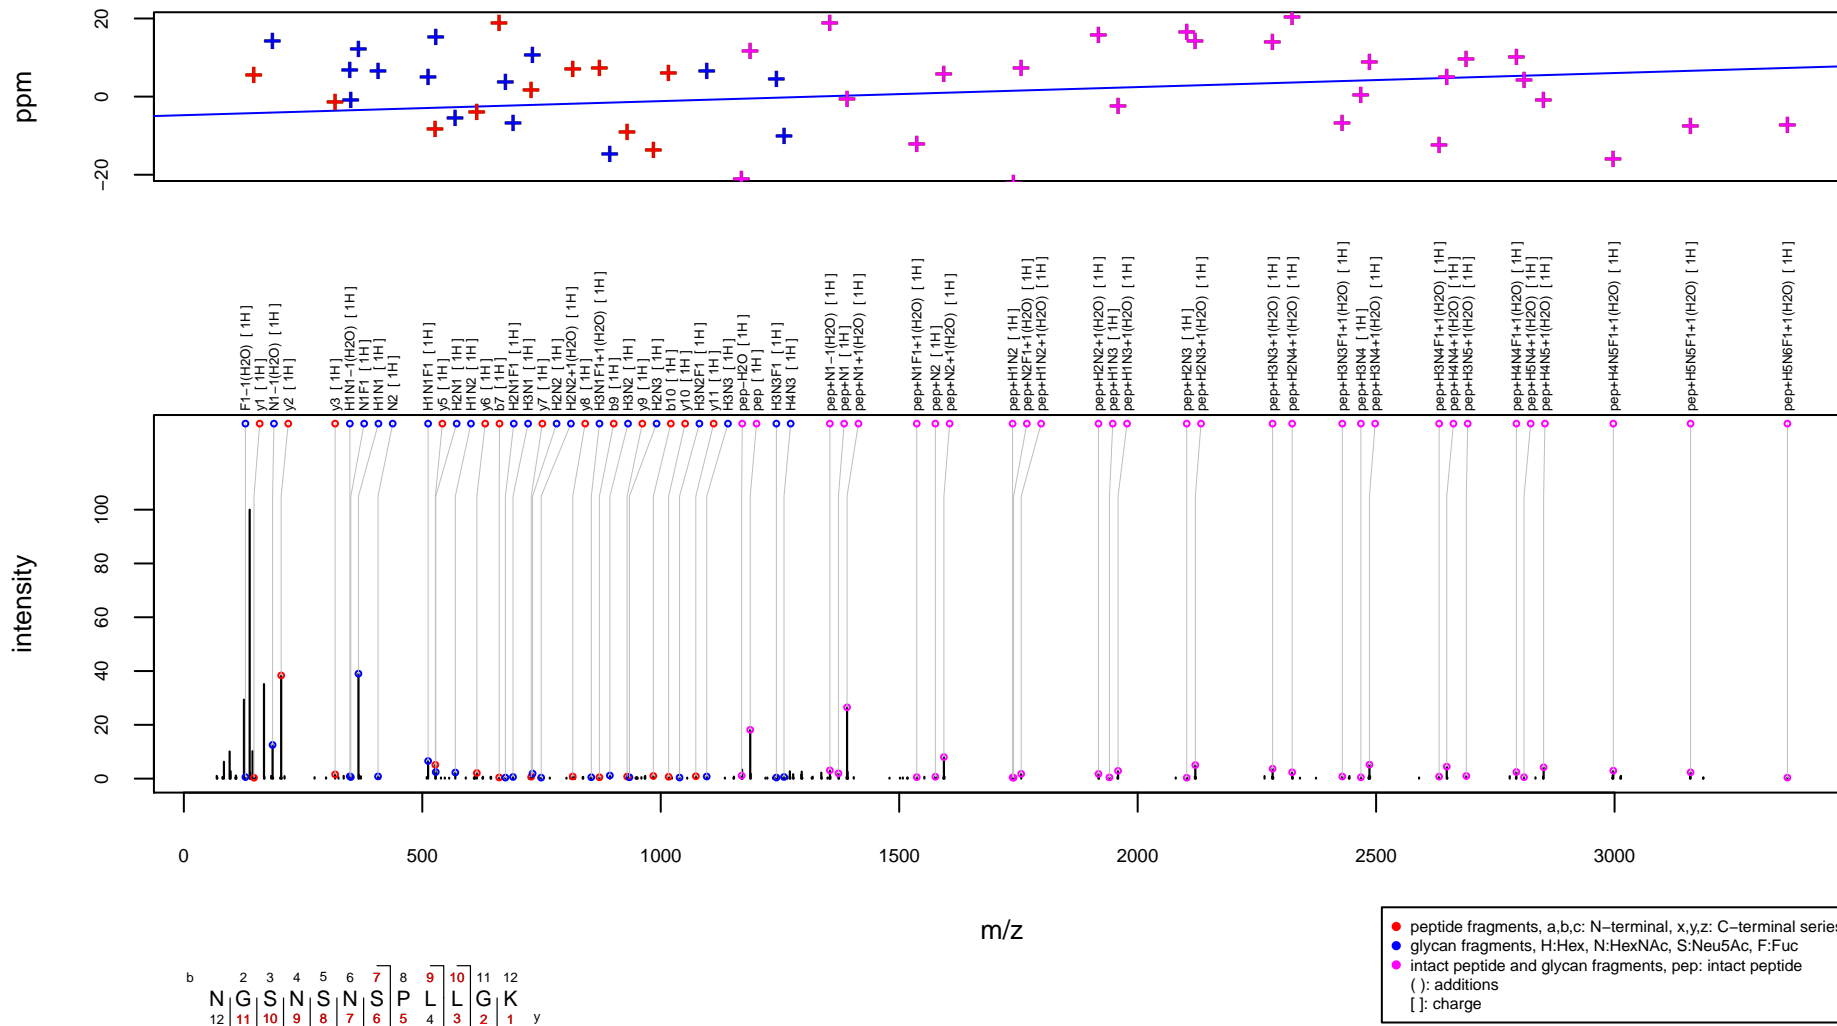

# m/z 1107.7909 charge 3 scan 0-0

Score= 68.02 , Hits= 45 , Explained Intensity= 0.45

Peptide: CUBN\_HUMAN[3457,3468]:NGSNSNSPLL GK

Glycan: HNHNH(F(H)NH)HNN, H6N5F1

Charge: 3H

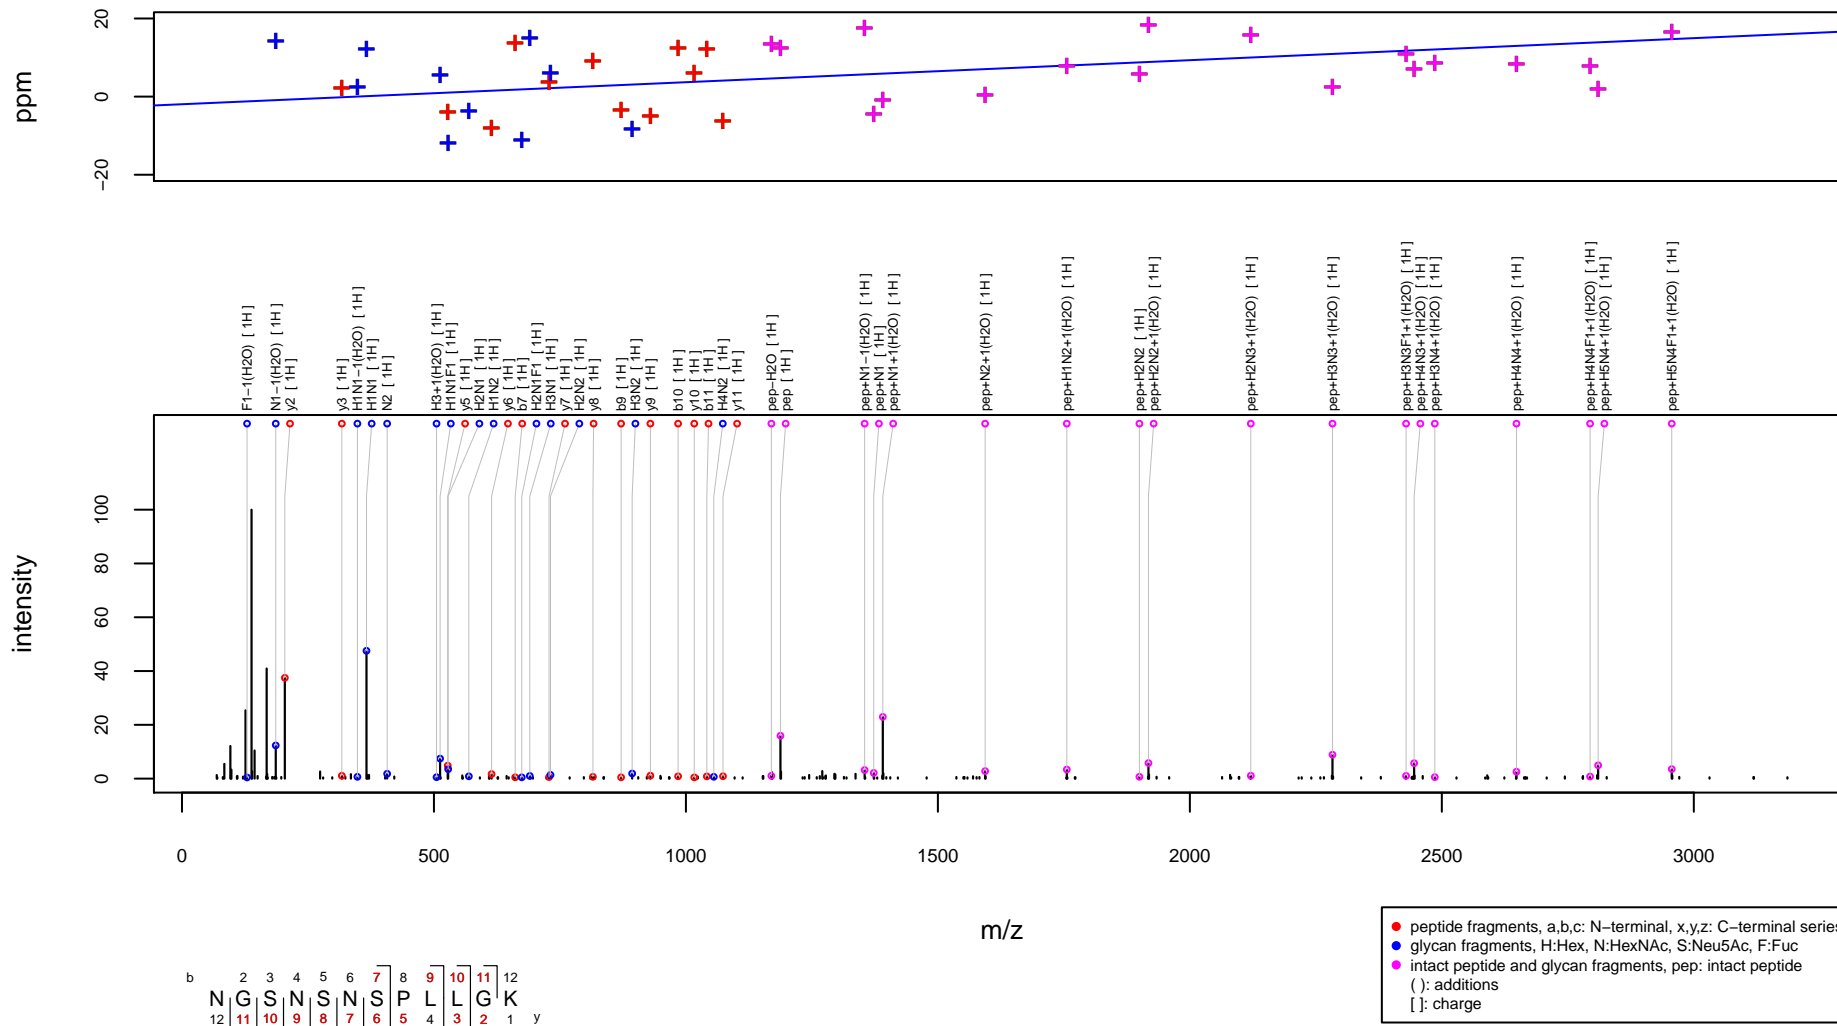

# m/z 925.6379 charge 4 scan 0-0

Score= 49.73 , Hits= 36 , Explained Intensity= 0.27  
 Peptide: LG3BP\_HUMAN[542,554]:AAIP<sup>1</sup>SALD<sup>2</sup>TNS<sup>3</sup>SK  
 Glycan: SHNHNH(F(H)NH)HNN, S1H6N5F1  
 Charge: 4H

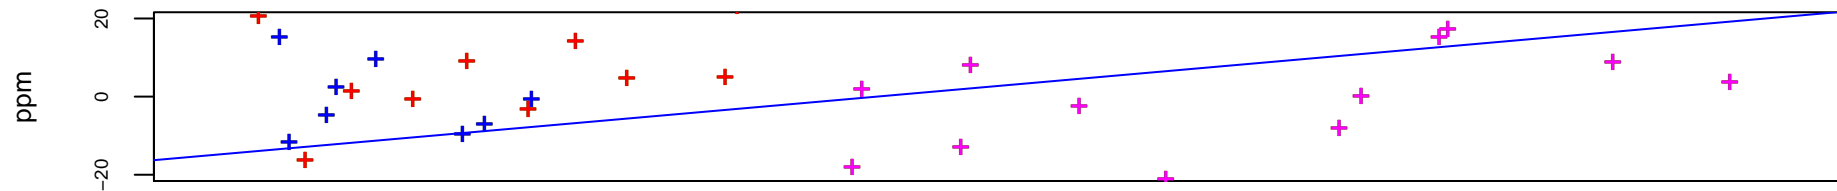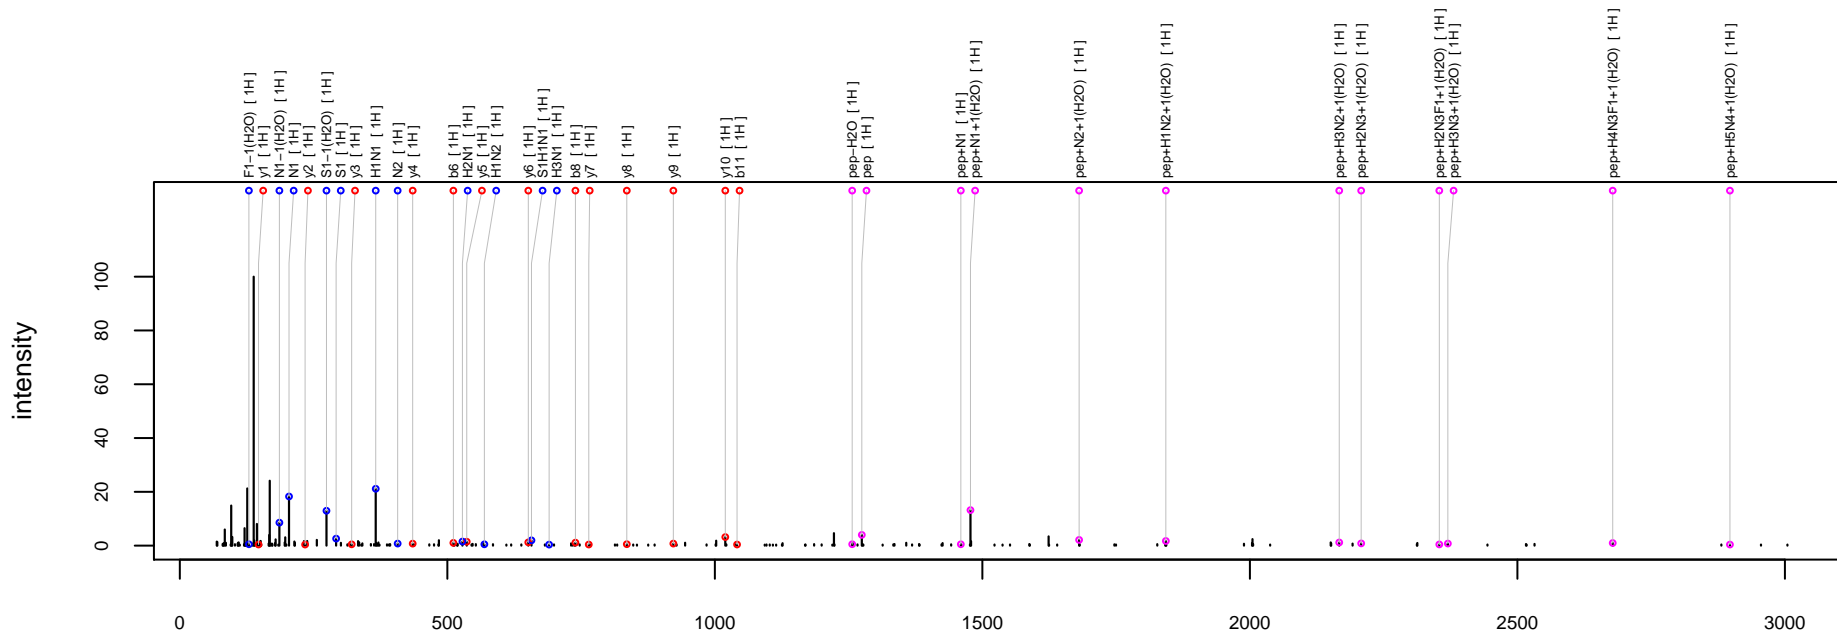

b    2    3    4    5    6    7    8    9    10    11    12    13  
 A    A    I    P    S    A    L    D    T    N    S    S    K  
 13 12 11 [10] [9] [8] [7] [6] [5] [4] [3] [2] [1] y

● peptide fragments, a,b,c: N-terminal, x,y,z: C-terminal series  
 ● glycan fragments, H:Hex, N:HexNAc, S:Neu5Ac, F:Fuc  
 ● intact peptide and glycan fragments, pep: intact peptide  
 ( ): additions  
 [ ]: charge

# m/z 1083.699 charge 4 scan 0-0

Score= 64.04 , Hits= 41 , Explained Intensity= 0.37

Peptide: CERU\_HUMAN[396,415]:ENLTAPGSDSAVFFEQGTTTR

Glycan: SHNH(SHNH)HNN, S2H5N4

Charge: 4H

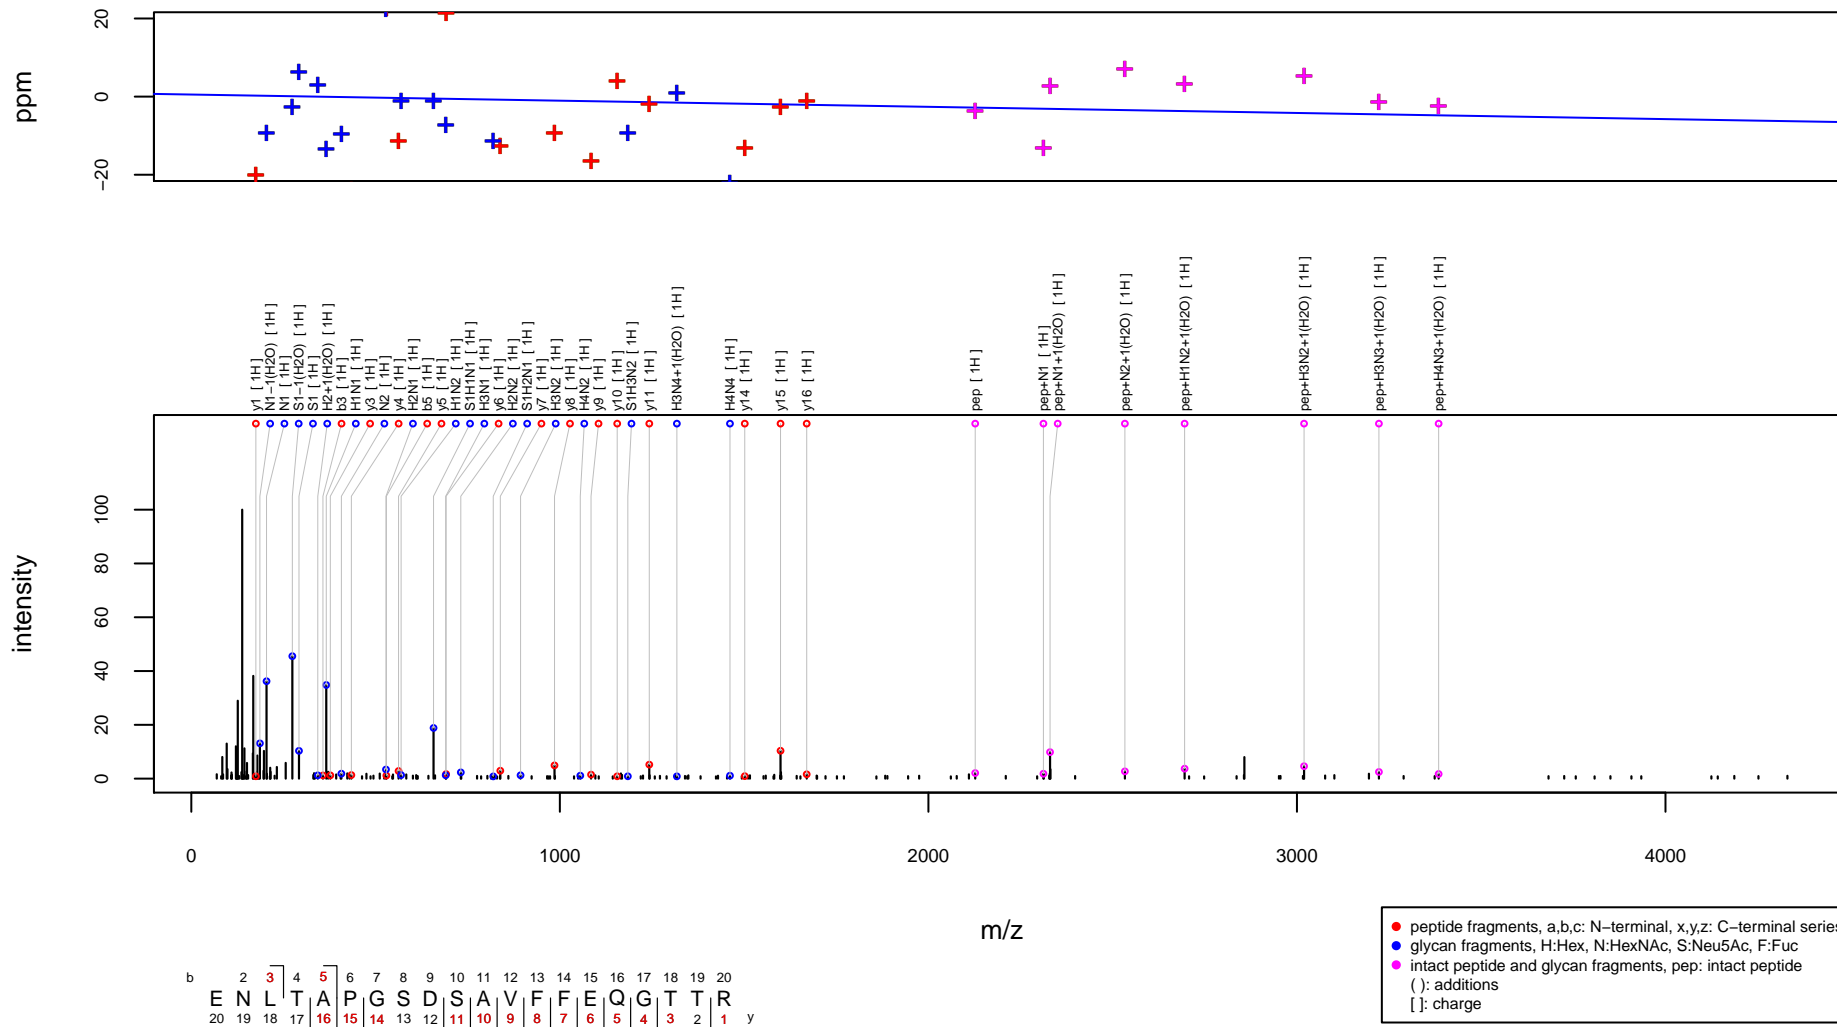

# m/z 1434.658 charge 3 scan 0-0

Score= 92.99 , Hits= 59 , Explained Intensity= 0.6

Peptide: IPSP\_HUMAN[254,274]:VVGVPYQGNATALFILPSEGK

Glycan: SNNH(NNH)HN(F)N, S1H3N6F1

Charge: 3H

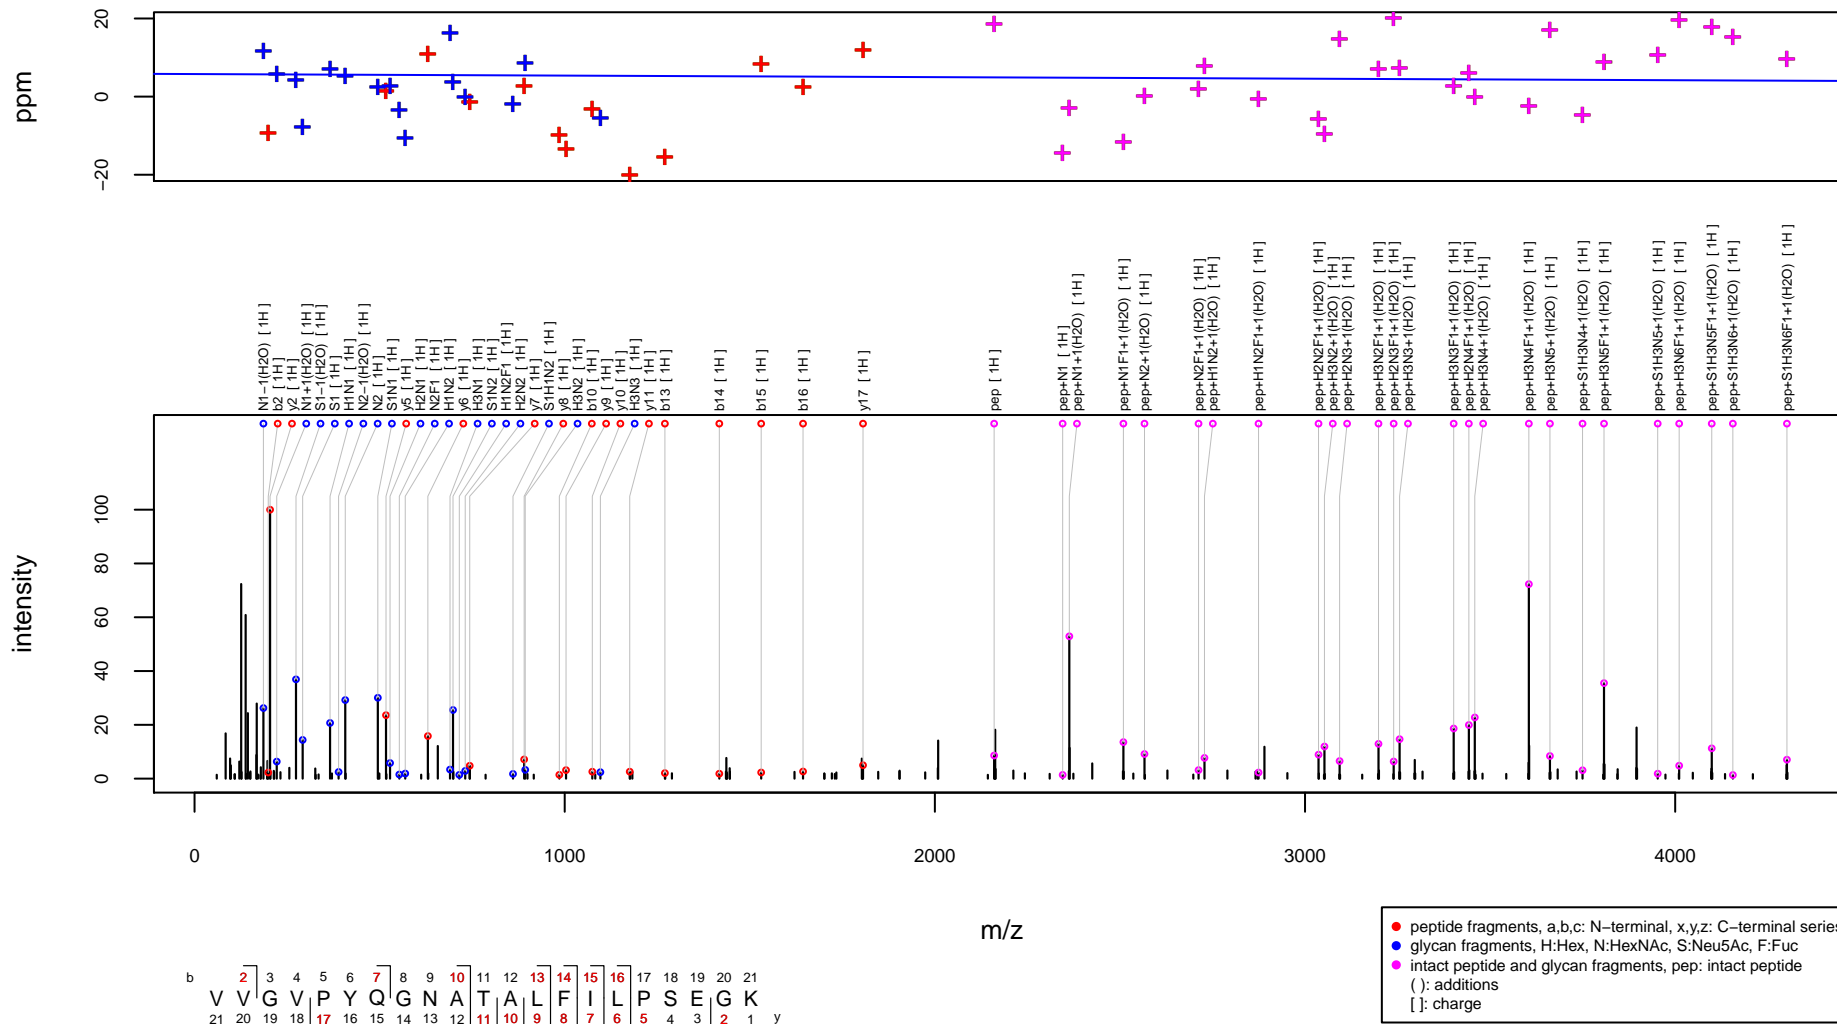

# m/z 806.0957 charge 4 scan 0-0

Score= 49.63 , Hits= 36 , Explained Intensity= 0.24

Peptide: IGHA2\_HUMAN[200,208]:TPLTANITK

Glycan: SHNH(HNH)(N)HN(F)N, S1H5N5F1

Charge: 4H

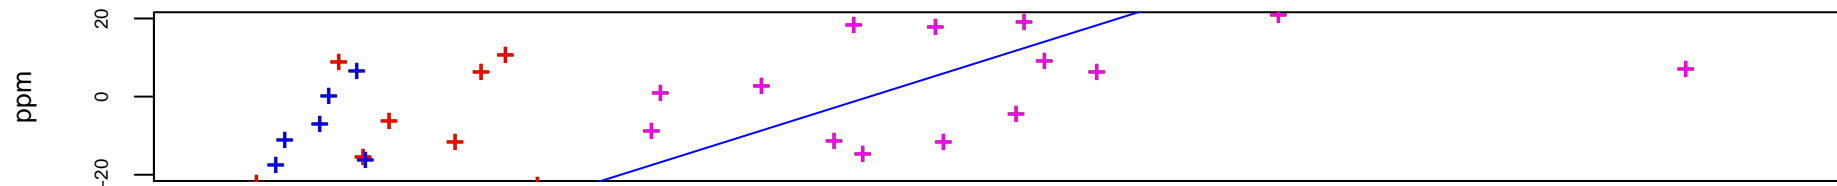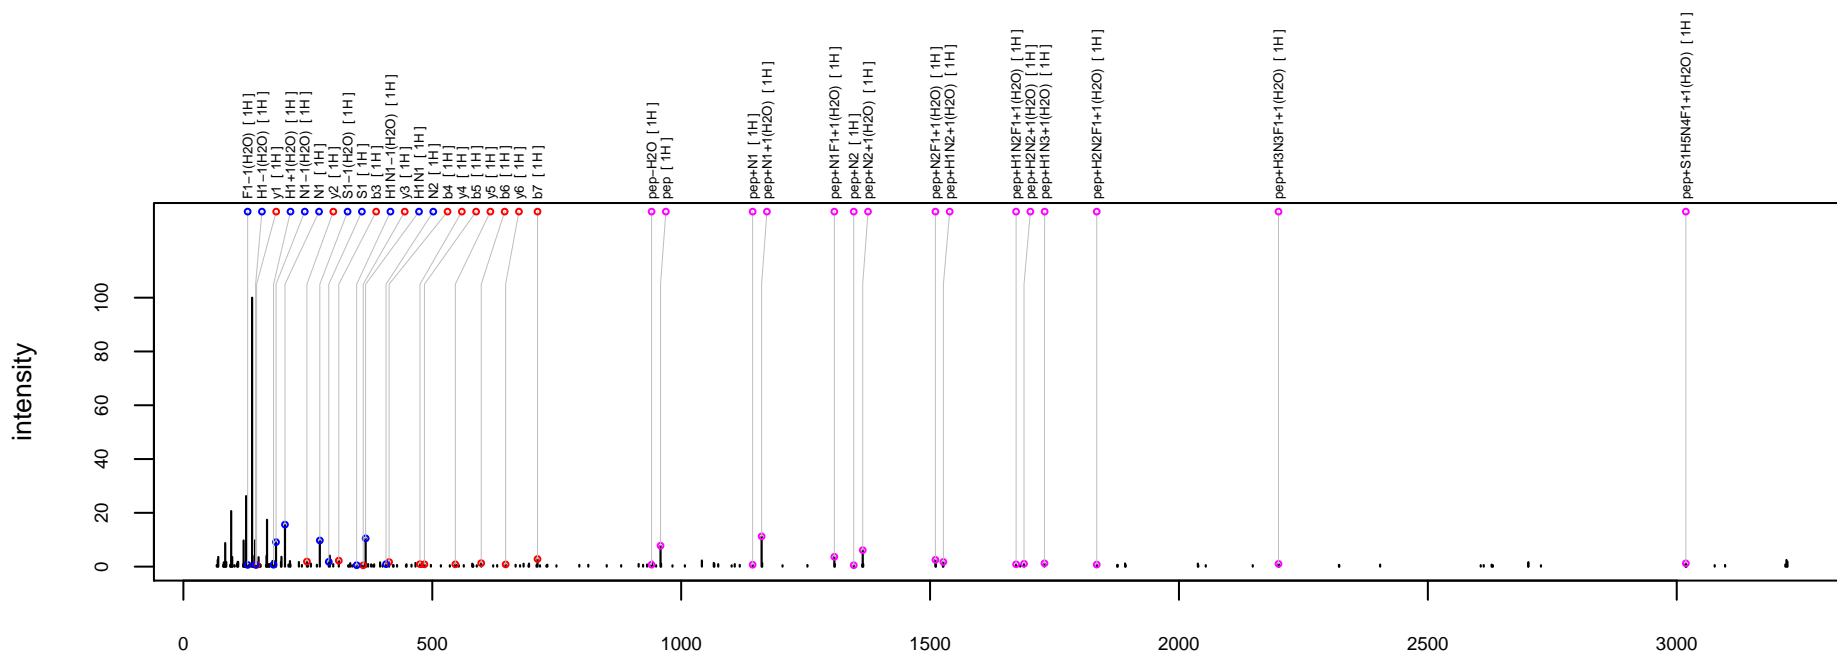

|   |   |   |   |   |   |   |   |   |   |
|---|---|---|---|---|---|---|---|---|---|
|   | 2 | 3 | 4 | 5 | 6 | 7 | 8 | 9 |   |
| b | T | P | L | T | A | N | I | T | K |
|   | 9 | 8 | 7 | 6 | 5 | 4 | 3 | 2 | 1 |

- peptide fragments, a,b,c: N-terminal, x,y,z: C-terminal series
- glycan fragments, H:Hex, N:HexNAc, S:Neu5Ac, F:Fuc
- intact peptide and glycan fragments, pep: intact peptide
- ( ): additions
- [ ]: charge

# m/z 958.8961 charge 4 scan 0-0

Score= 54.11 , Hits= 47 , Explained Intensity= 0.3

Peptide: CUBN\_HUMAN[2526,2537]:LCSSVNVSEIK

Glycan: H6N6F2

Charge: 4H

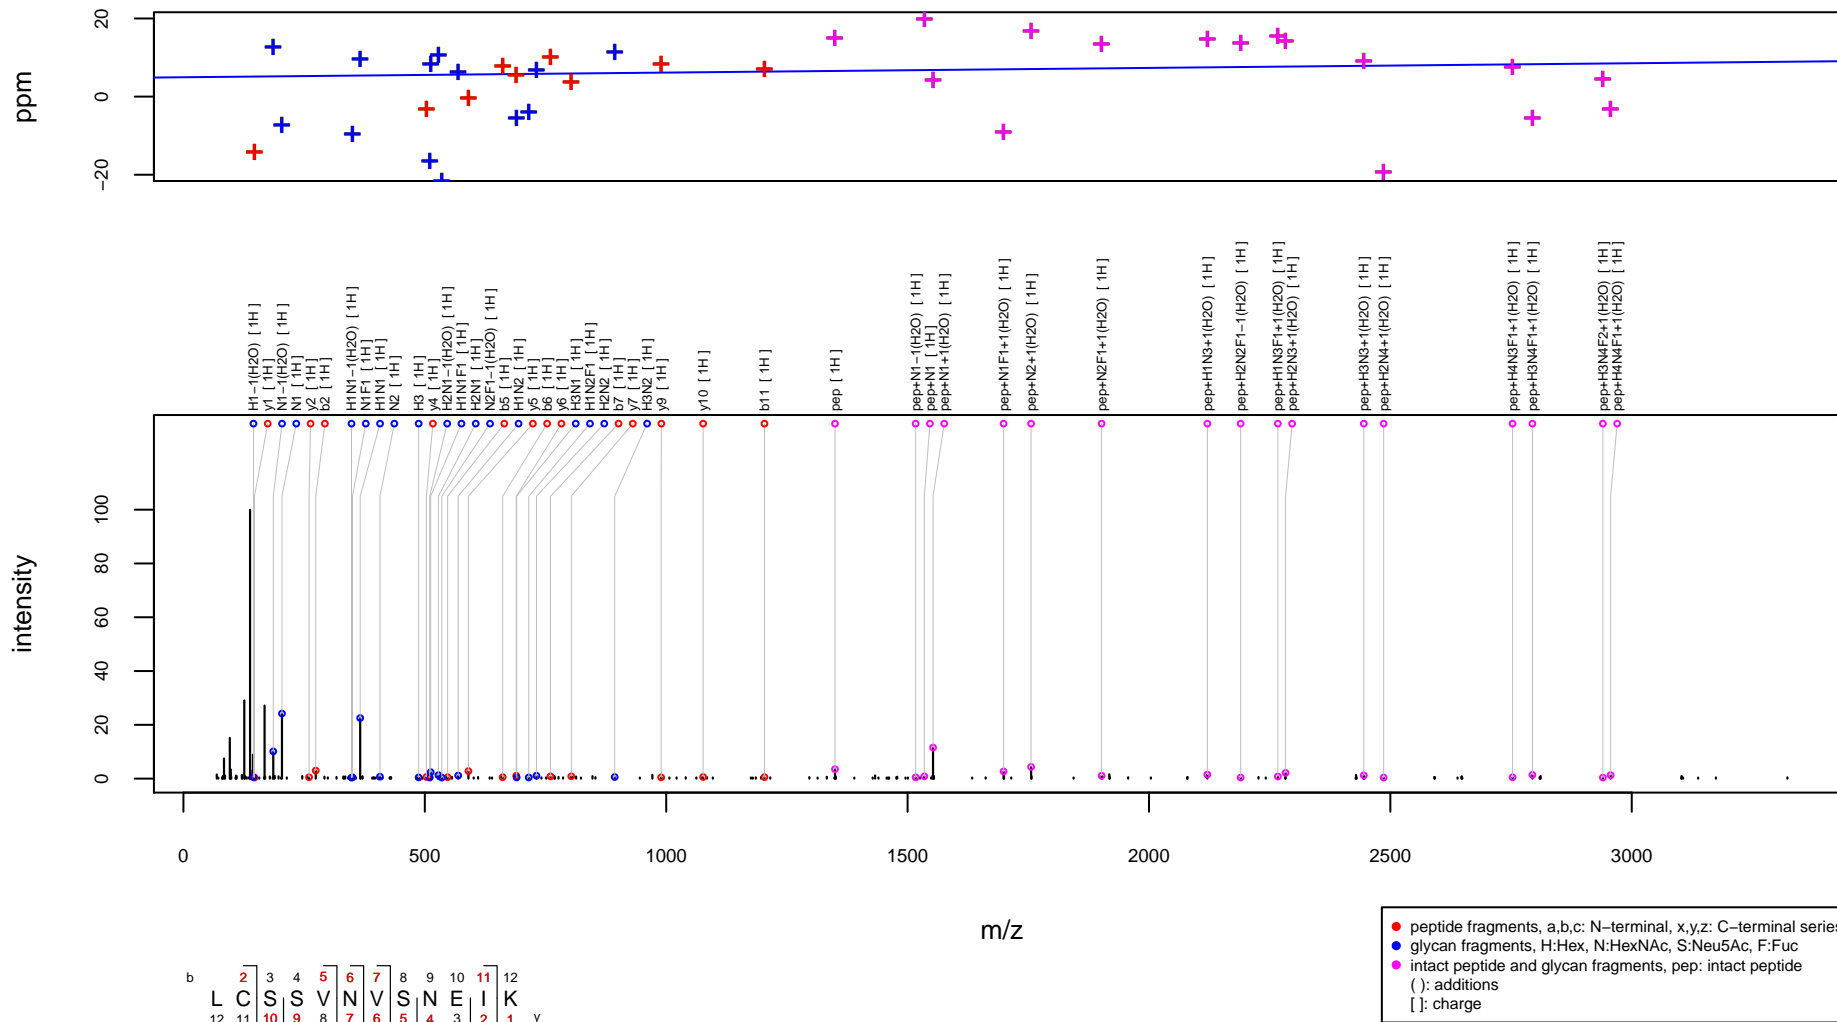



# m/z 984.0692 charge 3 scan 0-0

Score= 79.94 , Hits= 52 , Explained Intensity= 0.47  
 Peptide: CUBN\_HUMAN[2082,2090]:AGFNASFHK  
 Glycan: HNH(F(H)NH)(N)HNN, H5N5F1  
 Charge: 3H

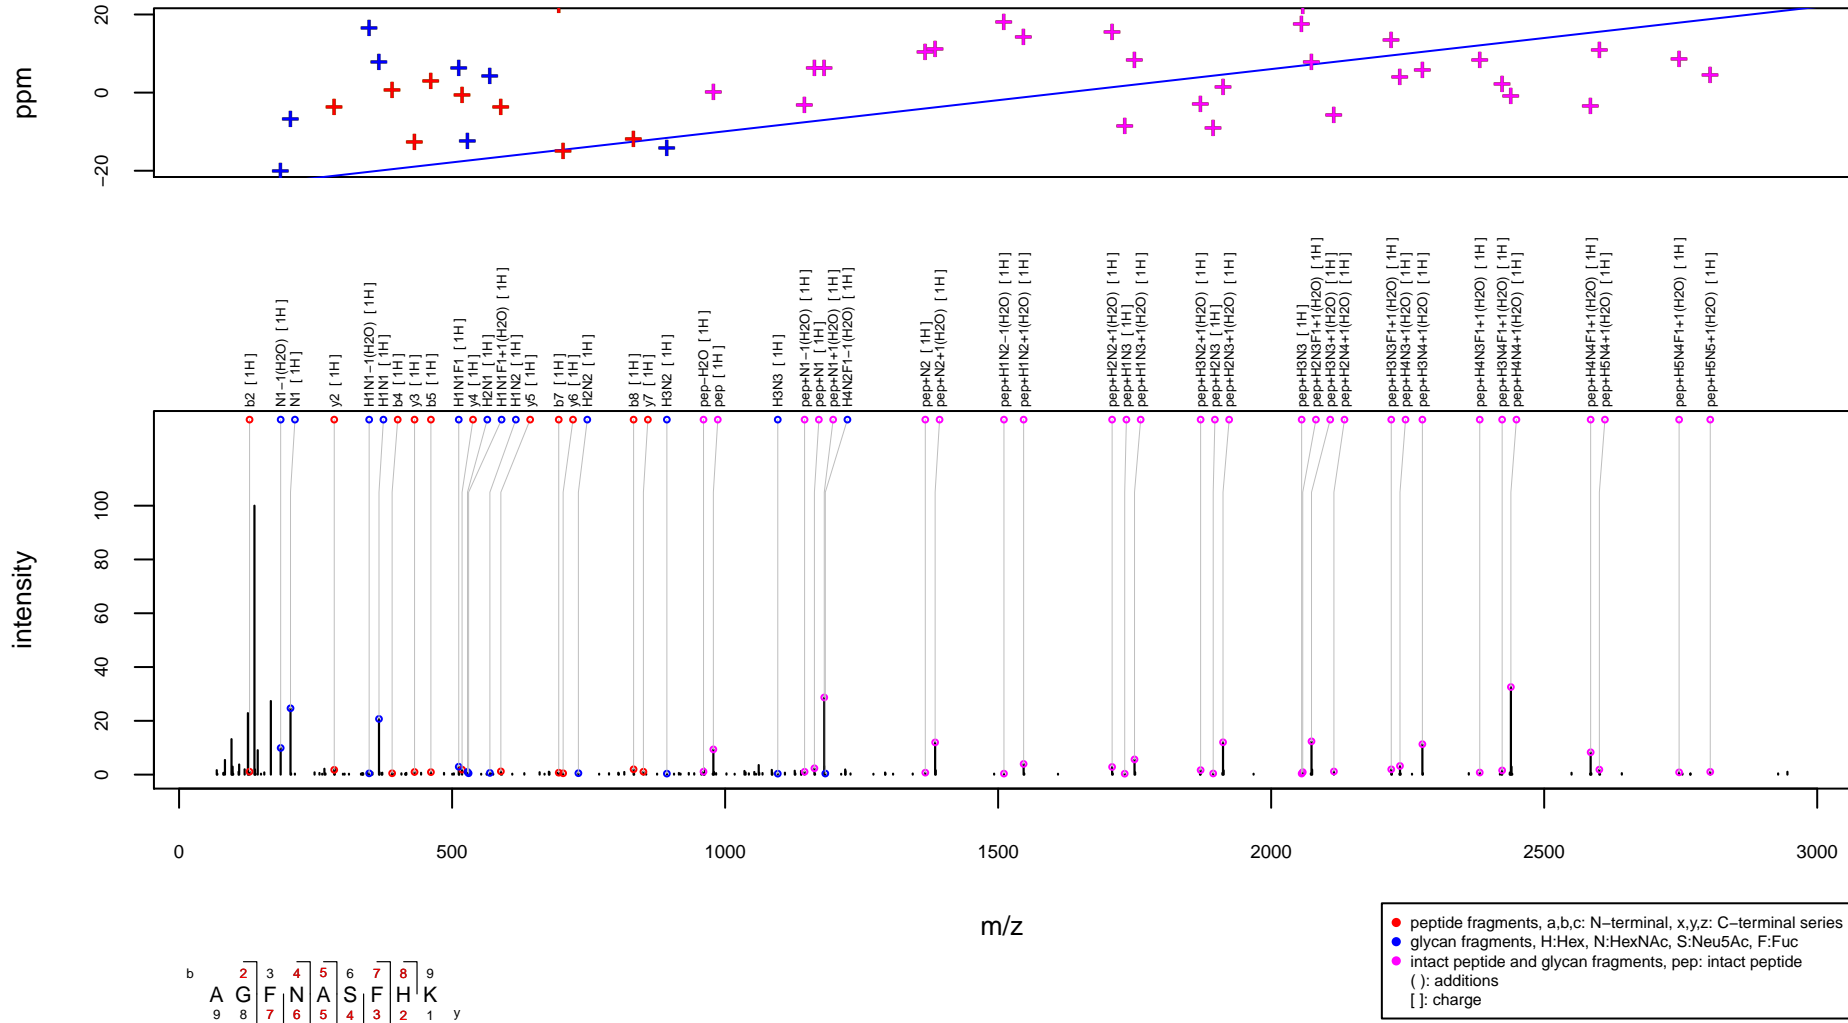

# m/z 1109.4706 charge 4 scan 0-0

Score= 57.65 , Hits= 49 , Explained Intensity= 0.35

Peptide: MGA\_HUMAN[817,834]:GGYIFPTQQPNTTTLASR

Glycan: H6N6F2

Charge: 4H

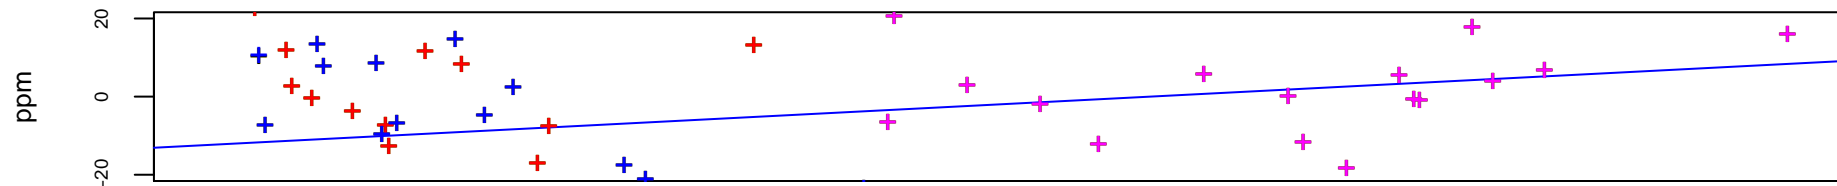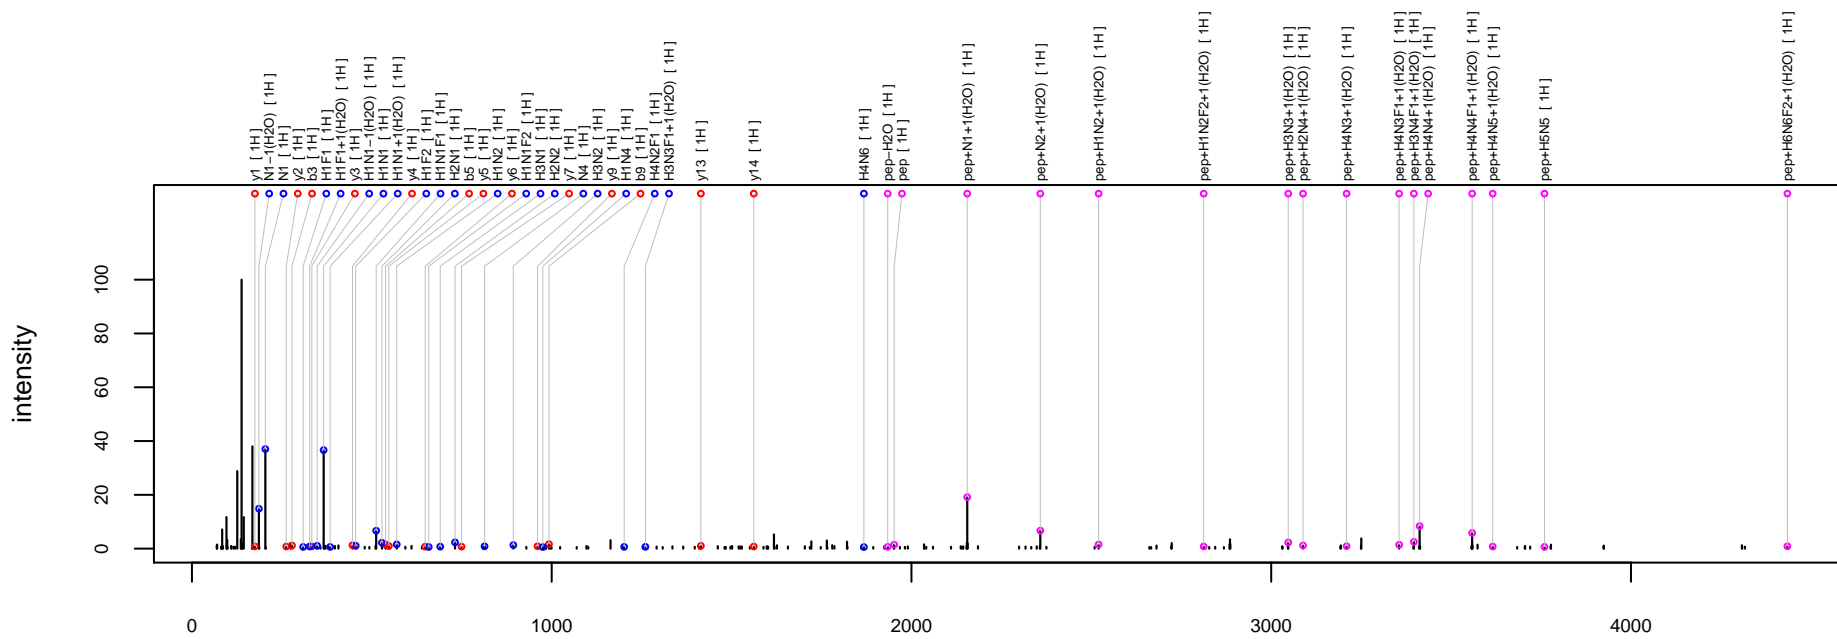

b 2 3 4 5 6 7 8 9 10 11 12 13 14 15 16 17 18  
 G G Y I F P T Q Q P N T T T L A S R  
 18 17 16 15 14 13 12 11 10 9 8 7 6 5 4 3 2 1 y

● peptide fragments, a,b,c: N-terminal, x,y,z: C-terminal series  
 ● glycan fragments, H:Hex, N:HexNAc, S:Neu5Ac, F:Fuc  
 ● intact peptide and glycan fragments, pep: intact peptide  
 ( ): additions  
 [ ]: charge

# m/z 935.3835 charge 3 scan 0-0

Score= 64.64 , Hits= 39 , Explained Intensity= 0.35

Peptide: CUBN\_HUMAN[2082,2090]:AGFNASFHK

Glycan: HNH(HNH)(N)HNN, H5N5

Charge: 3H

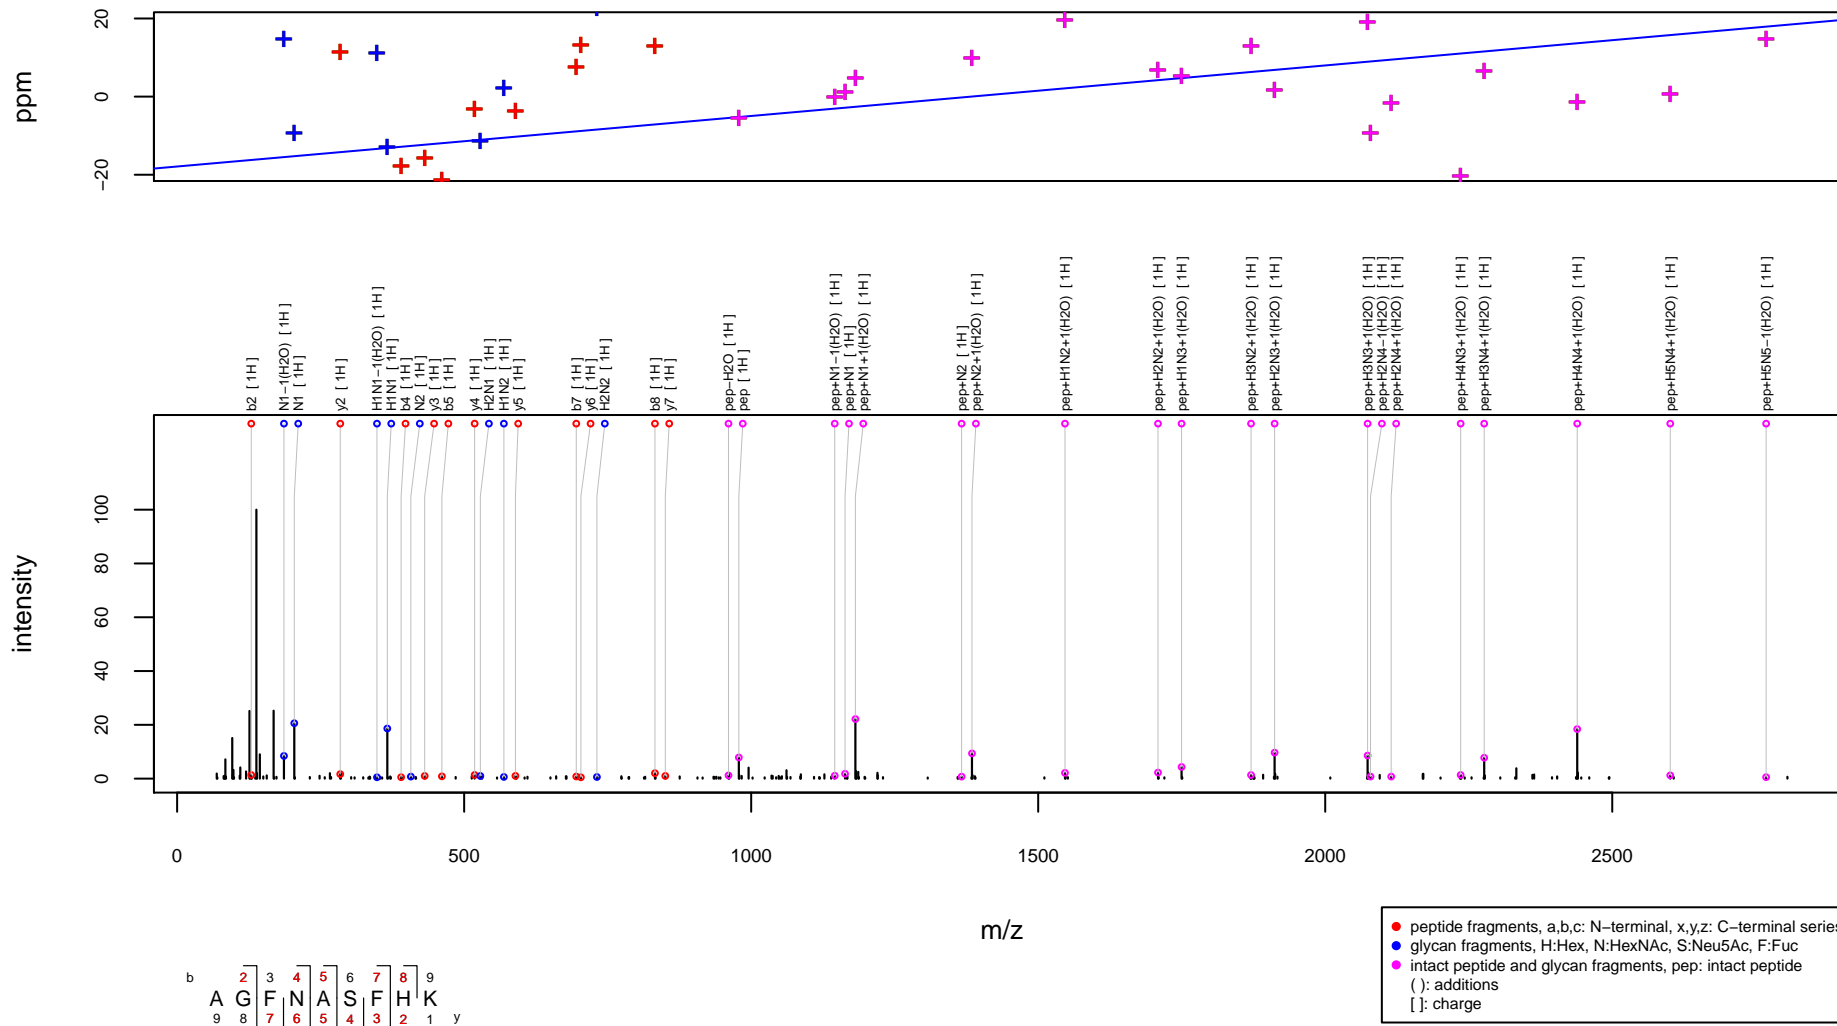

# m/z 922.0402 charge 3 scan 0-0

Score= 76.97 , Hits= 47 , Explained Intensity= 0.37

Peptide: IGHG2\_HUMAN[172,180]:EEQFNSTFR

Glycan: HNH(NH)HN(F)N, H4N4F1

Charge: 3H

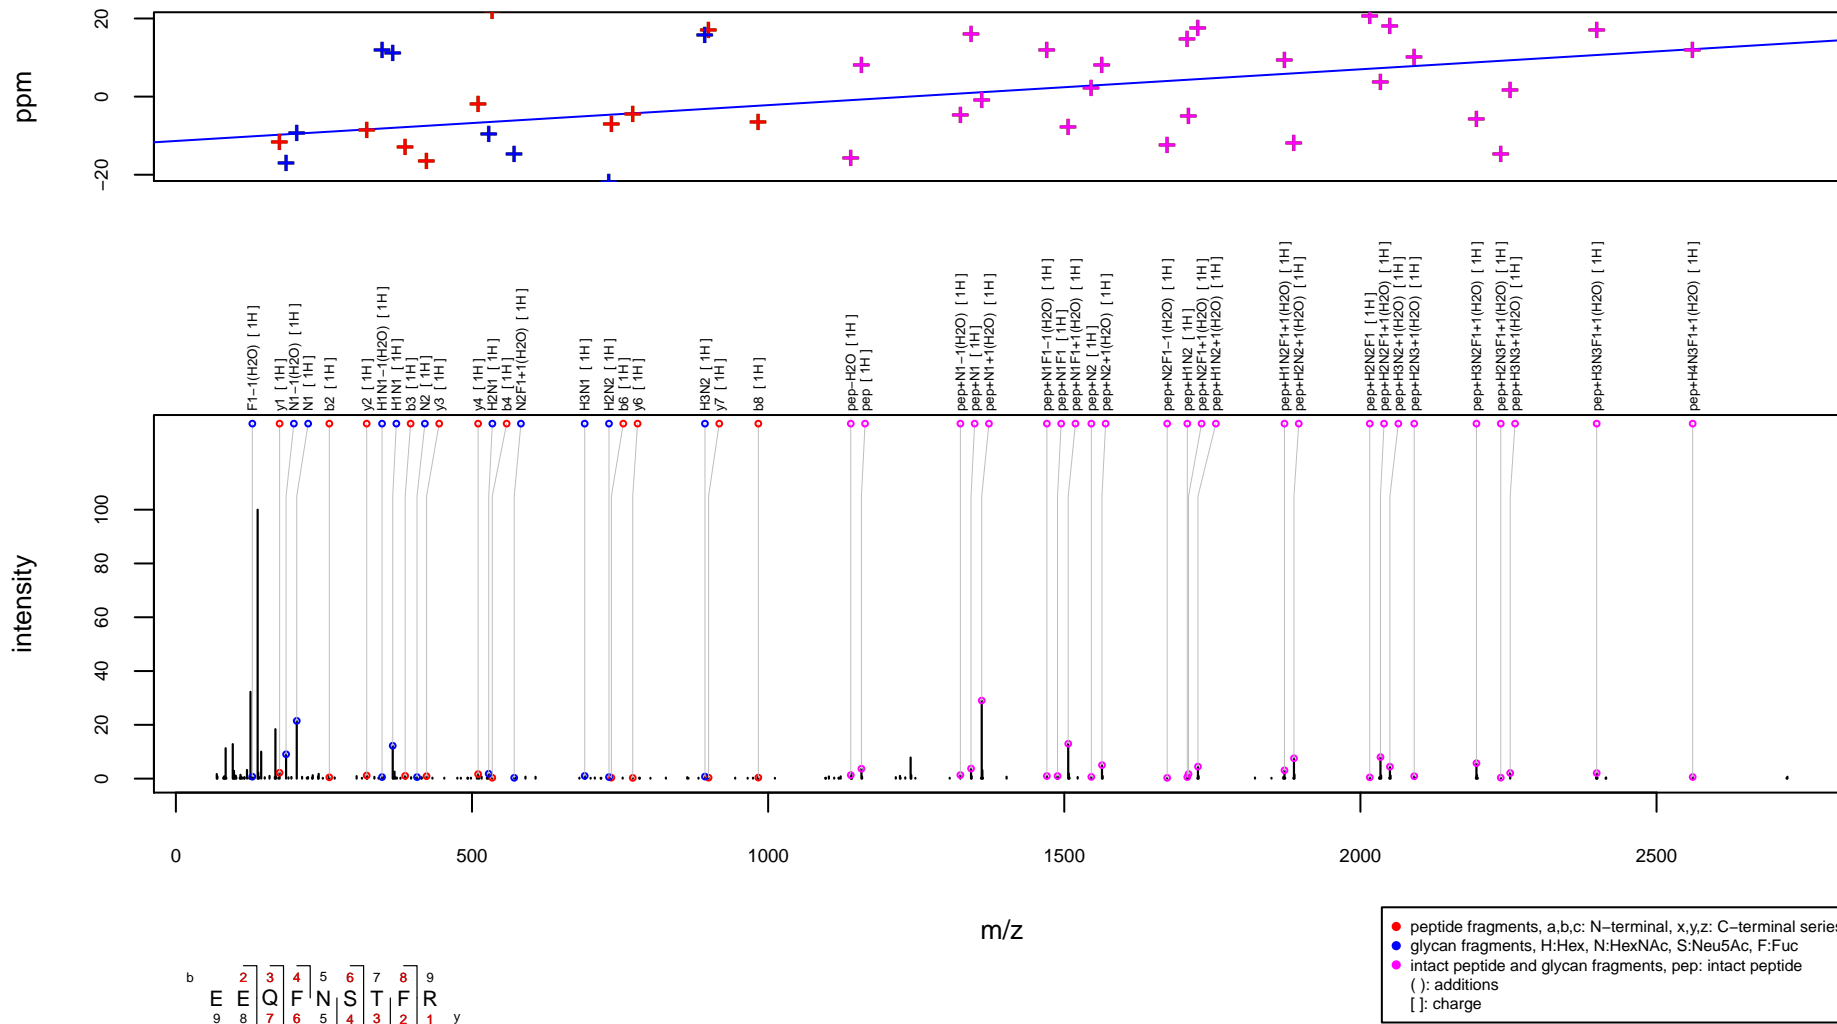

# m/z 958.4092 charge 4 scan 0-0

Score= 50.24 , Hits= 43 , Explained Intensity= 0.3

Peptide: LG3BP\_HUMAN[64,76]:ALGFENATQALGR

Glycan: H6N6F2

Charge: 4H

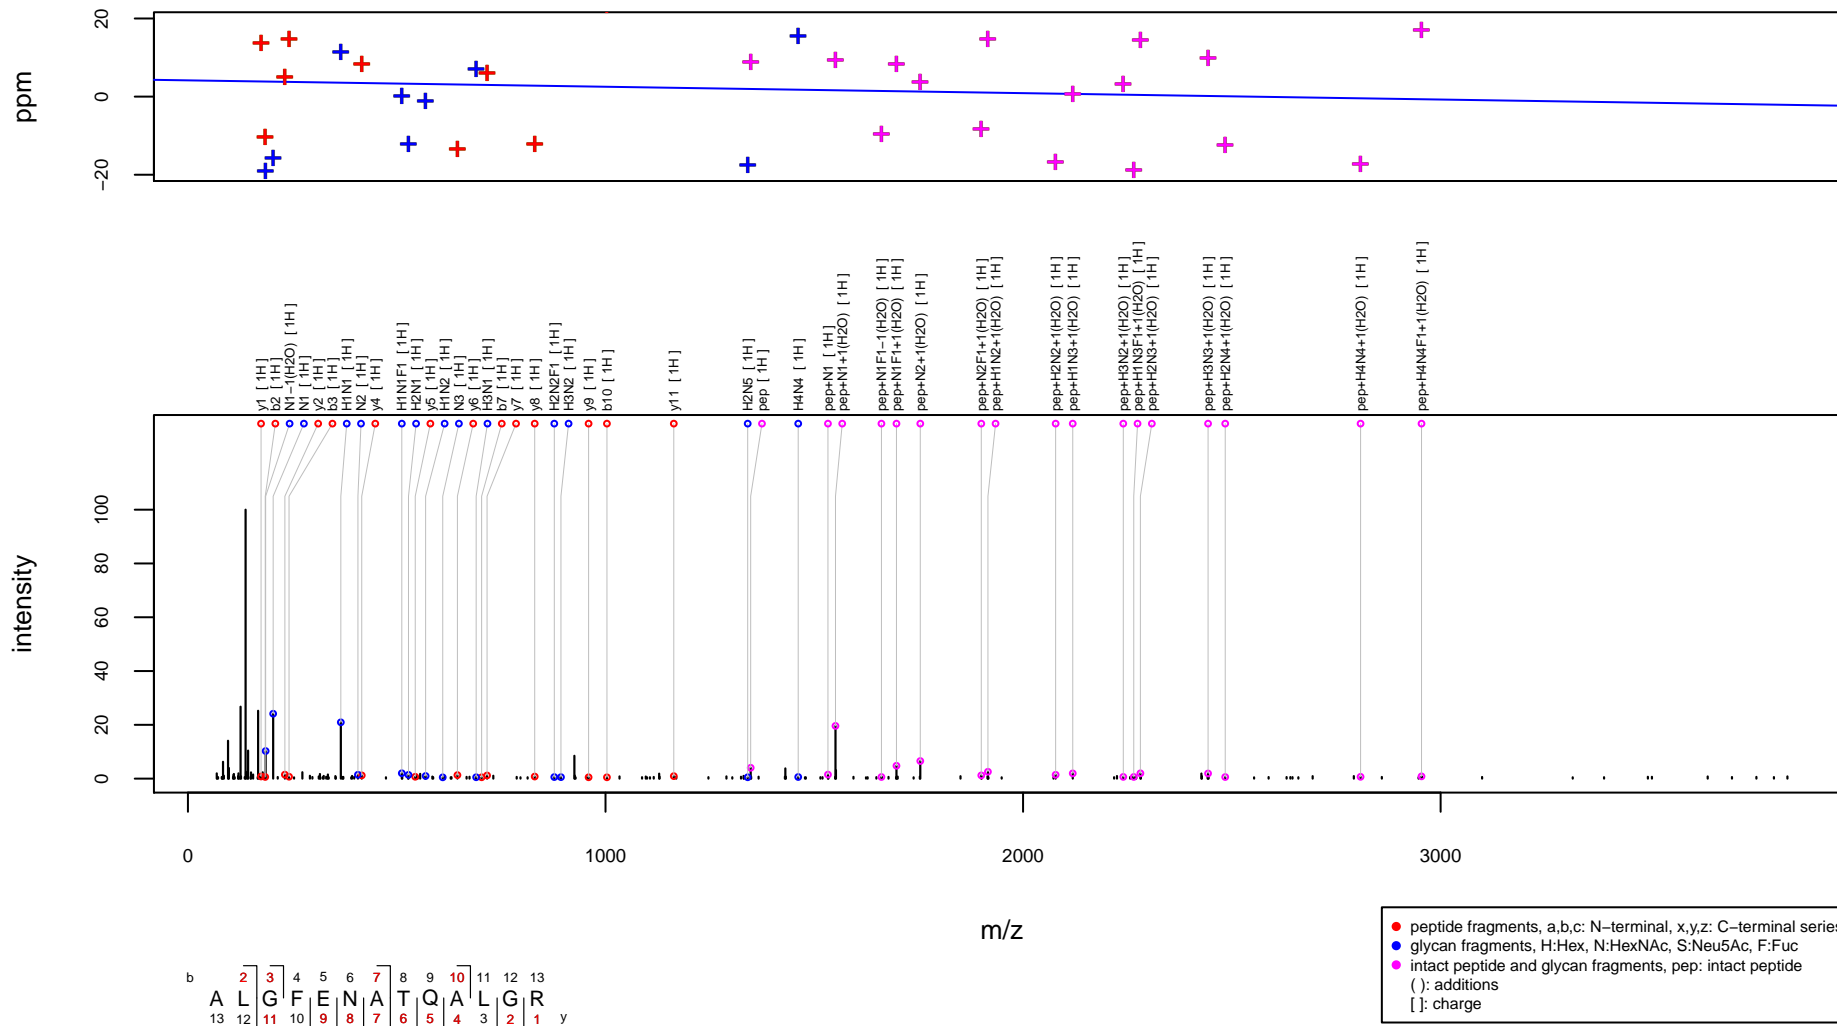

# m/z 933.8698 charge 4 scan 0-0

Score= 47.31 , Hits= 31 , Explained Intensity= 0.3

Peptide: APOD\_HUMAN[61,73]:CIQANYSLMENGK

Glycan: SHNH(SHNH)HNN, S2H5N4

Charge: 4H

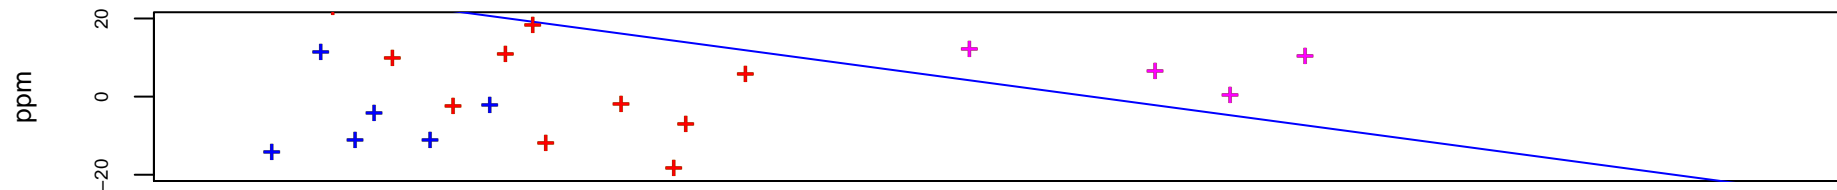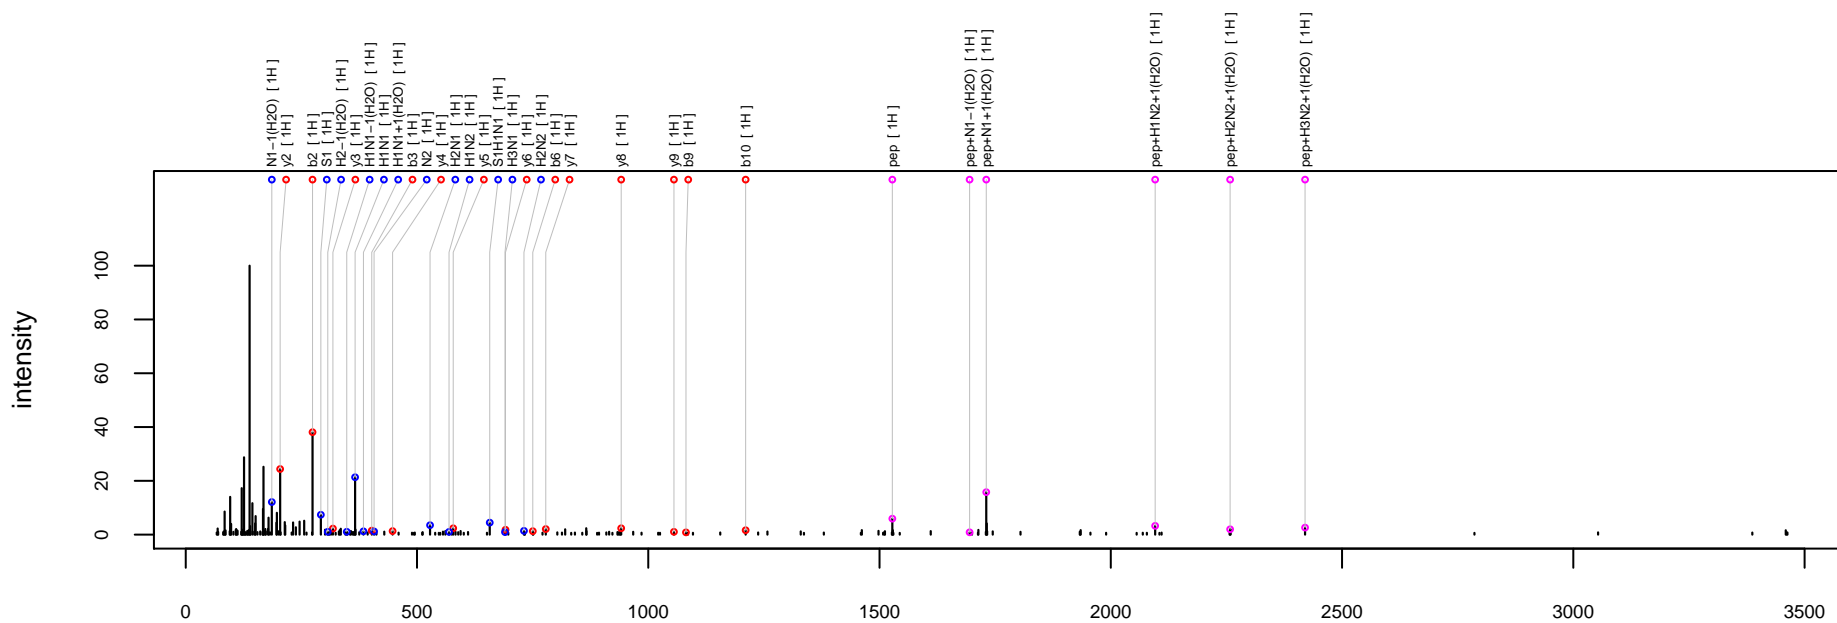

b

|    |    |    |    |   |   |   |   |   |    |    |    |    |
|----|----|----|----|---|---|---|---|---|----|----|----|----|
|    | 2  | 3  | 4  | 5 | 6 | 7 | 8 | 9 | 10 | 11 | 12 | 13 |
| C  | I  | Q  | A  | N | Y | S | L | M | E  | N  | G  | K  |
| 13 | 12 | 11 | 10 | 9 | 8 | 7 | 6 | 5 | 4  | 3  | 2  | 1  |

y

- peptide fragments, a,b,c: N-terminal, x,y,z: C-terminal series
- glycan fragments, H:Hex, N:HexNAc, S:Neu5Ac, F:Fuc
- intact peptide and glycan fragments, pep: intact peptide
- ( ): additions
- [ ]: charge

# m/z 1131.4786 charge 3 scan 0-0

Score= 83.22 , Hits= 58 , Explained Intensity= 0.44

Peptide: LG3BP\_HUMAN[542,554]:AAIPALSDTNSSK

Glycan: FHNH(HNH)(N)HN(F)N, H5N5F2

Charge: 3H

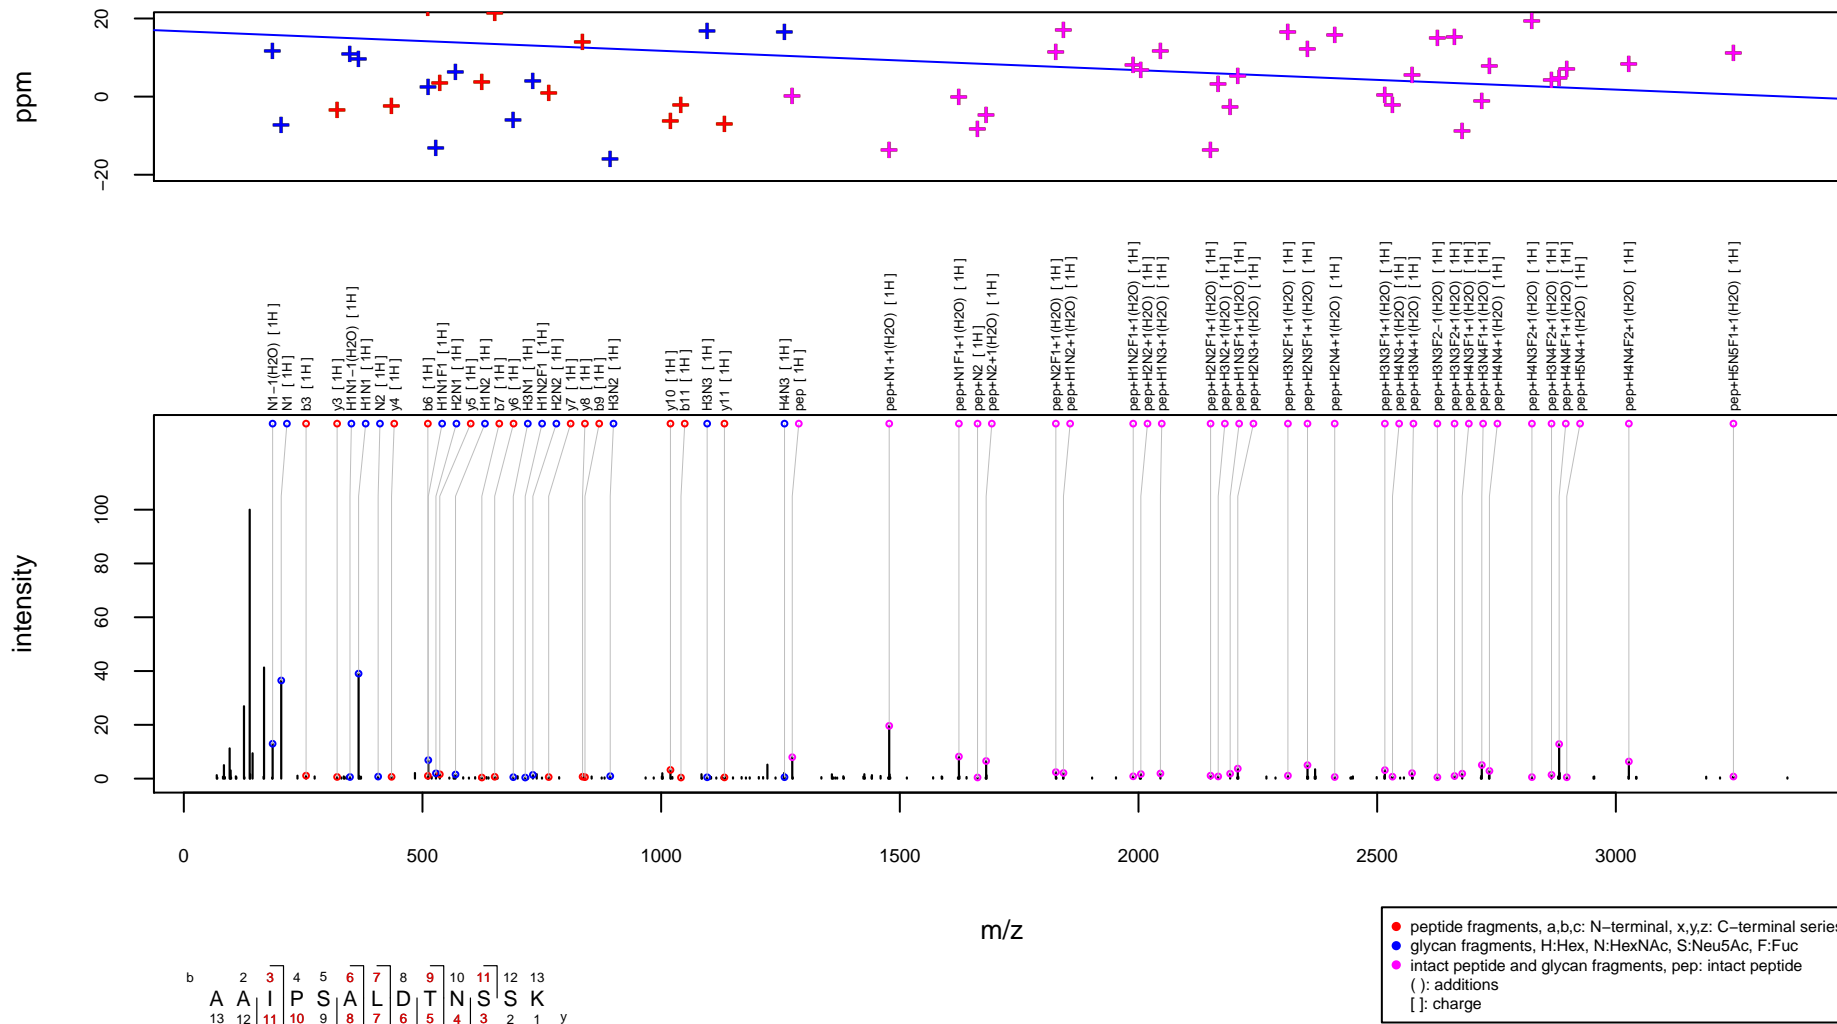

# m/z 1028.7776 charge 3 scan 0-0

Score= 77.28 , Hits= 51 , Explained Intensity= 0.37

Peptide: LG3BP\_HUMAN[542,554]:AAIP<sup>S</sup>ALD<sup>T</sup>NSSK

Glycan: HNH(NH)(N)HN(F)N, H4N5F1

Charge: 3H

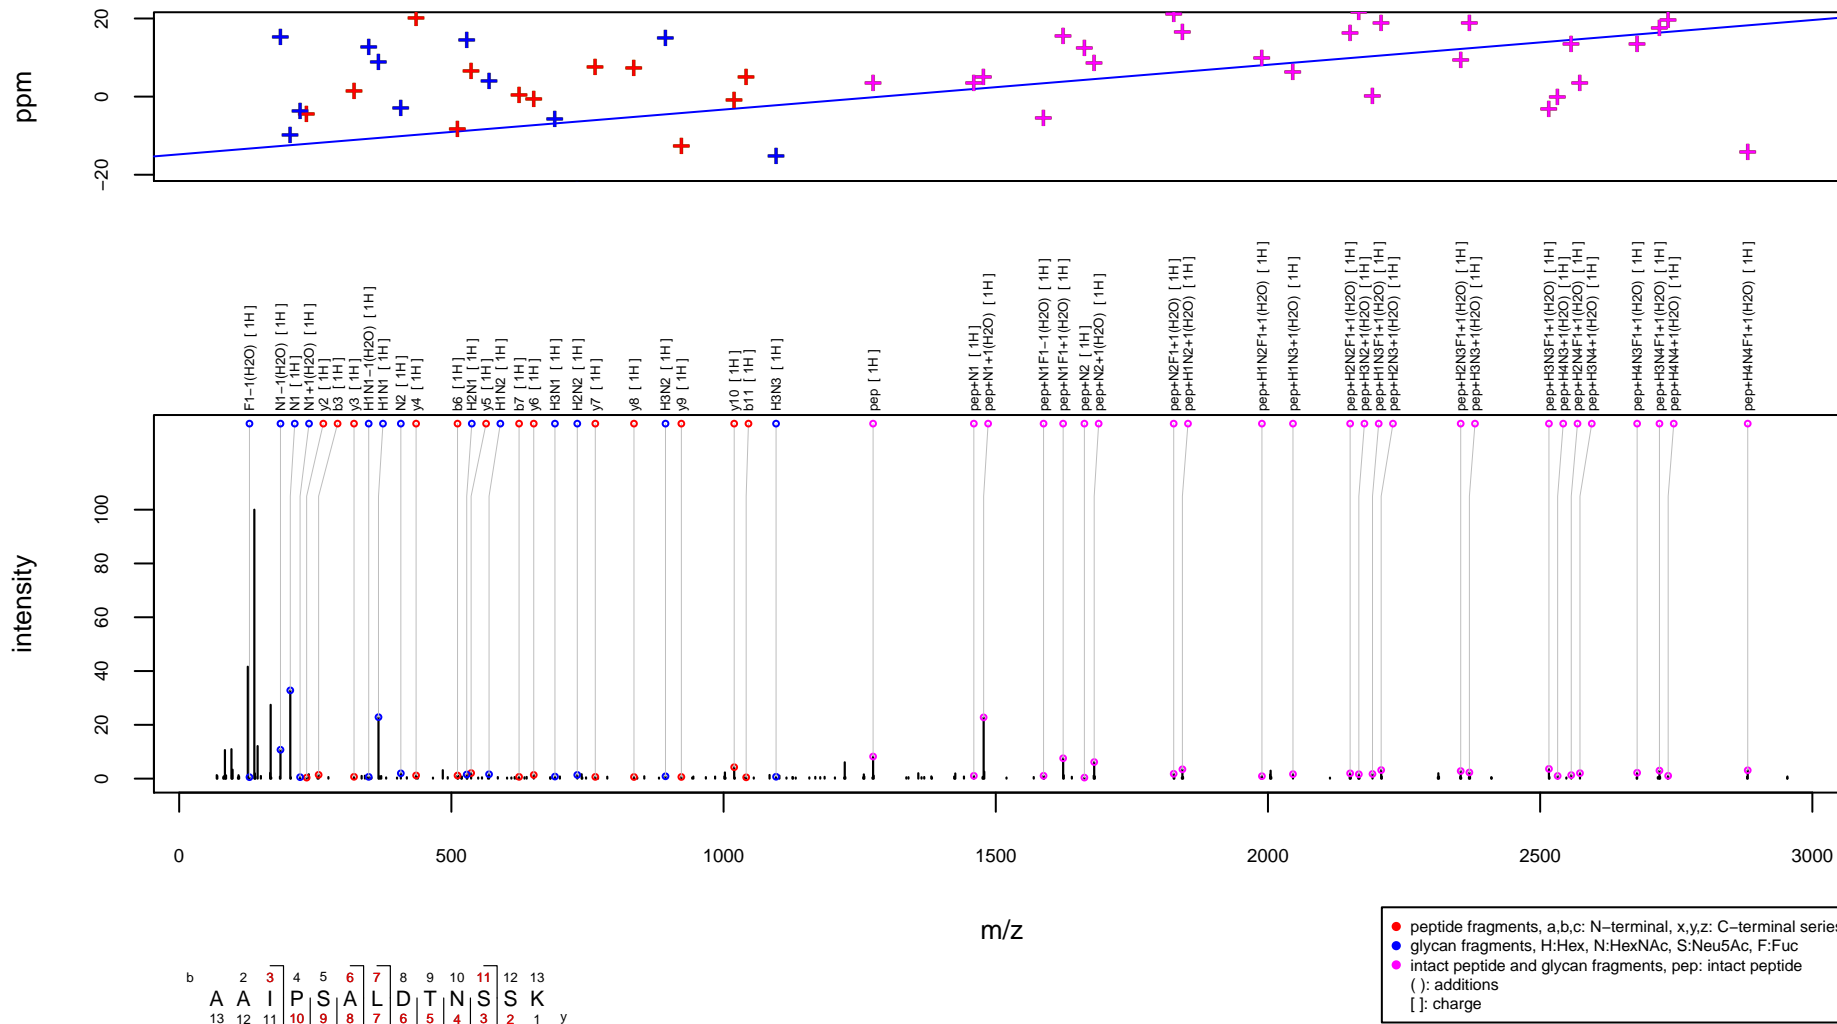



# m/z 961.0837 charge 3 scan 0-0

Score= 68.96 , Hits= 44 , Explained Intensity= 0.31

Peptide: LG3BP\_HUMAN[542,554]:AAIP<sup>S</sup>ALD<sup>T</sup>NSSK

Glycan: HNH(NH)HN(F)N, H4N4F1

Charge: 3H

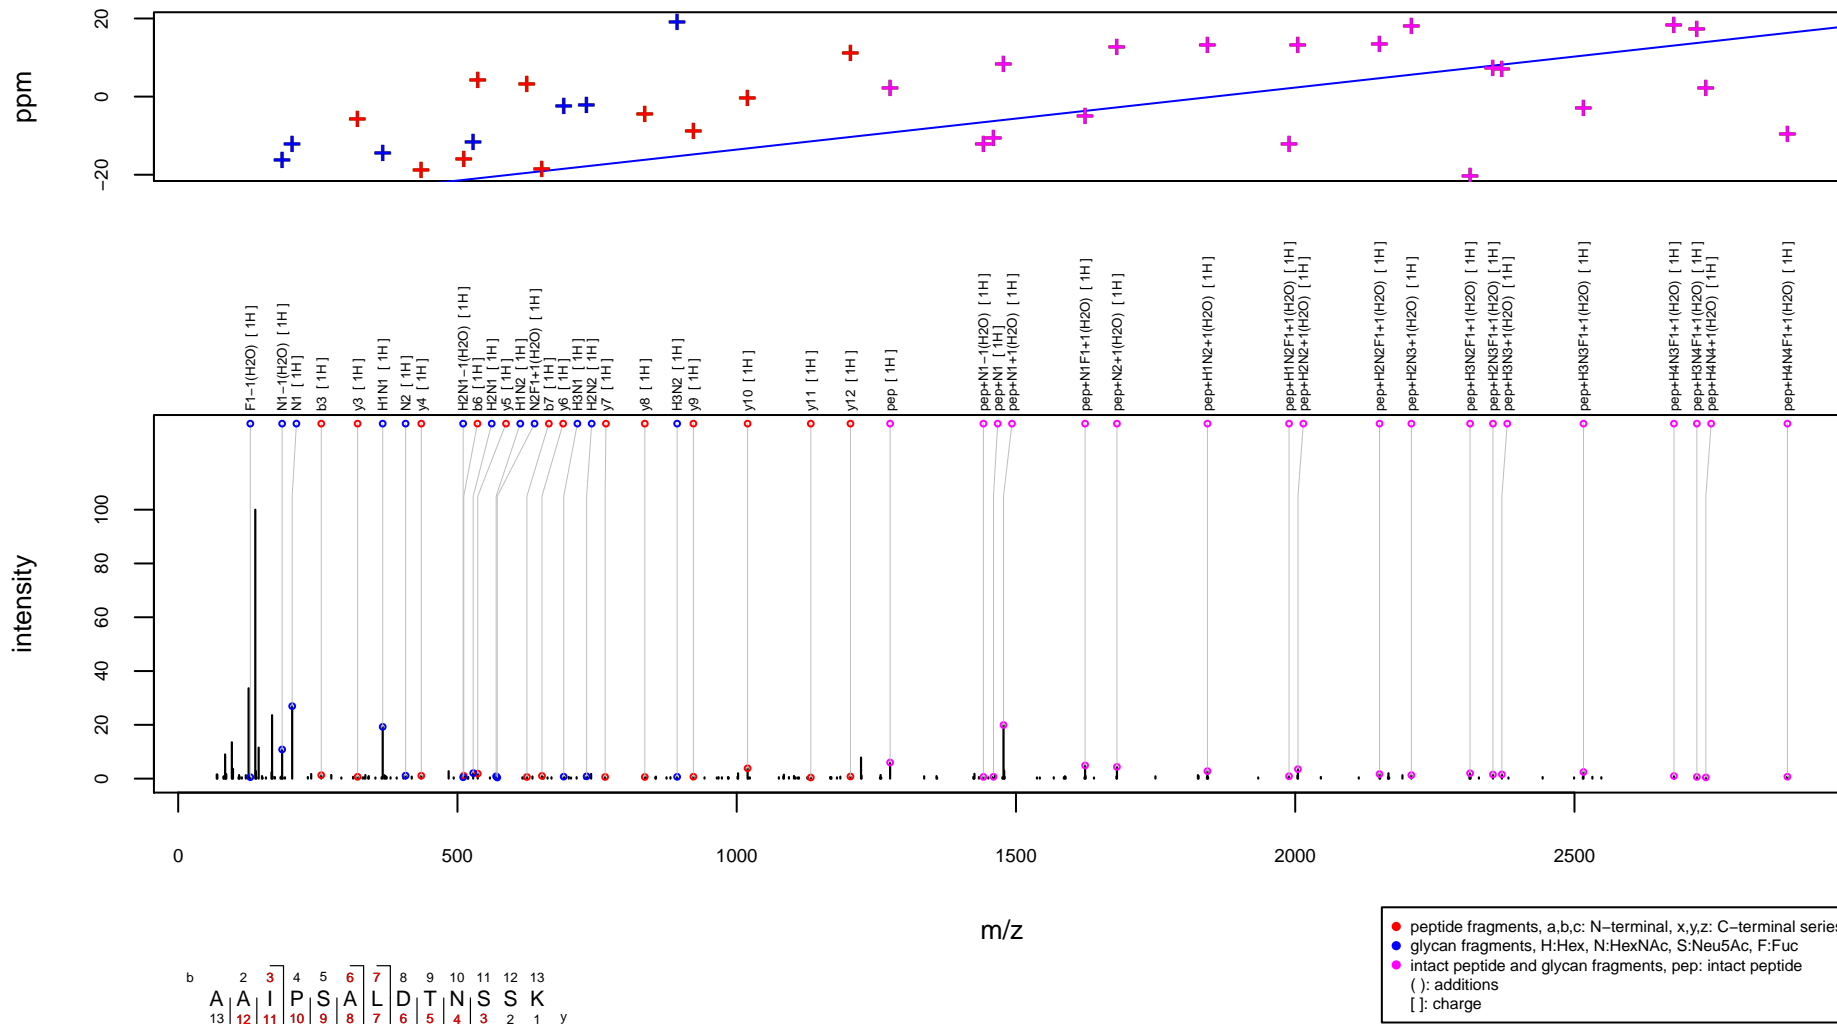

# m/z 1049.4482 charge 3 scan 0-0

Score= 65.74 , Hits= 41 , Explained Intensity= 0.41

Peptide: LAMP2\_HUMAN[352,361]:VQPFNVTQ GK

Glycan: HNH(NN(HN)H)HNN, H5N6

Charge: 3H

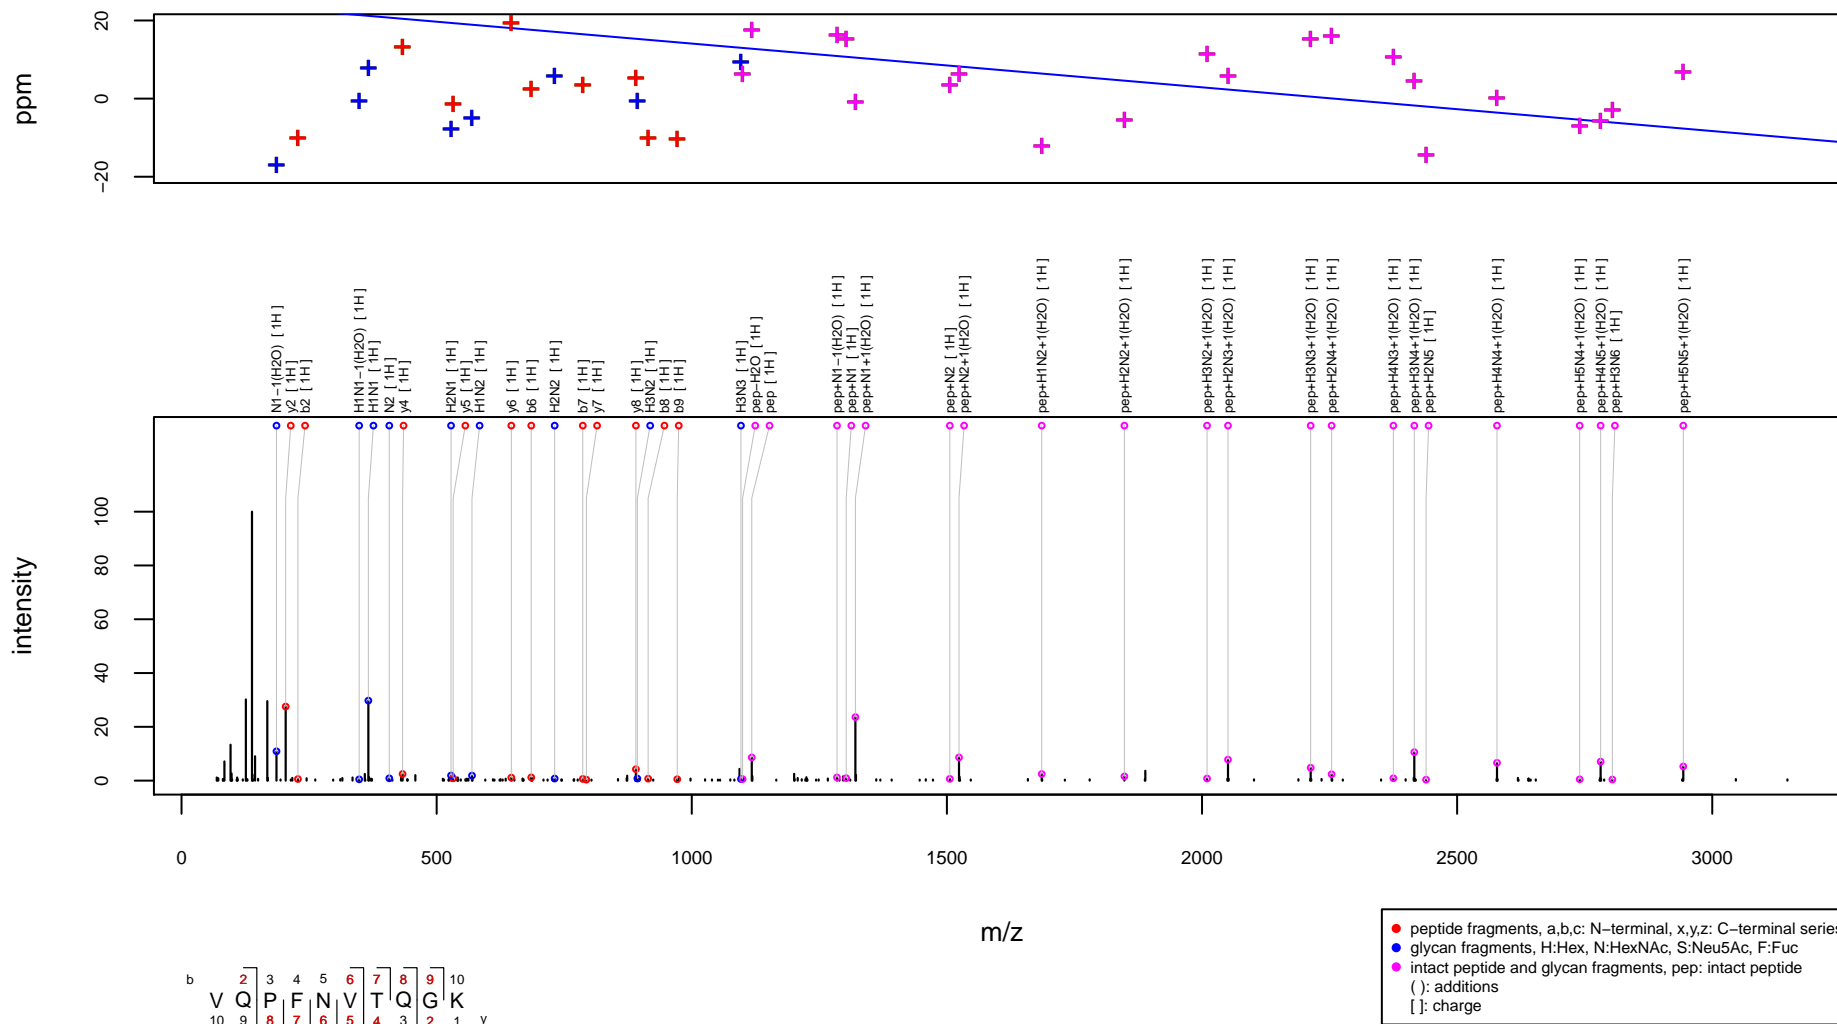

# m/z 926.4069 charge 3 scan 0-0

Score= 44.28 , Hits= 26 , Explained Intensity= 0.25

Peptide: SYPL1\_HUMAN[56,72]:GQTEIQVNCPPAVTENK

Glycan: H(H)HNN, H3N2

Charge: 3H

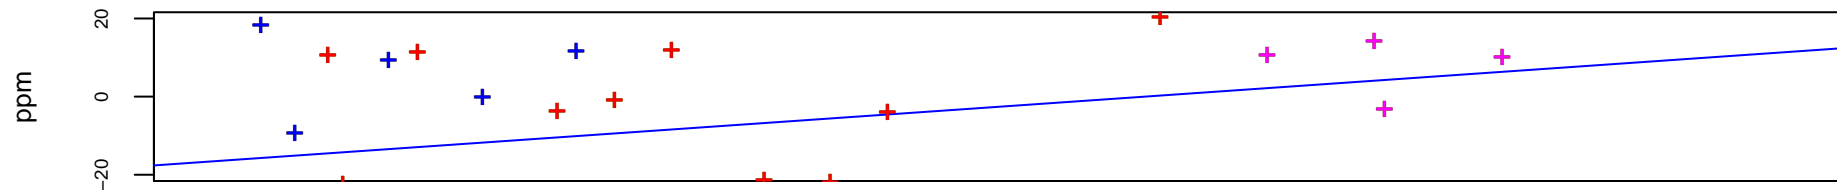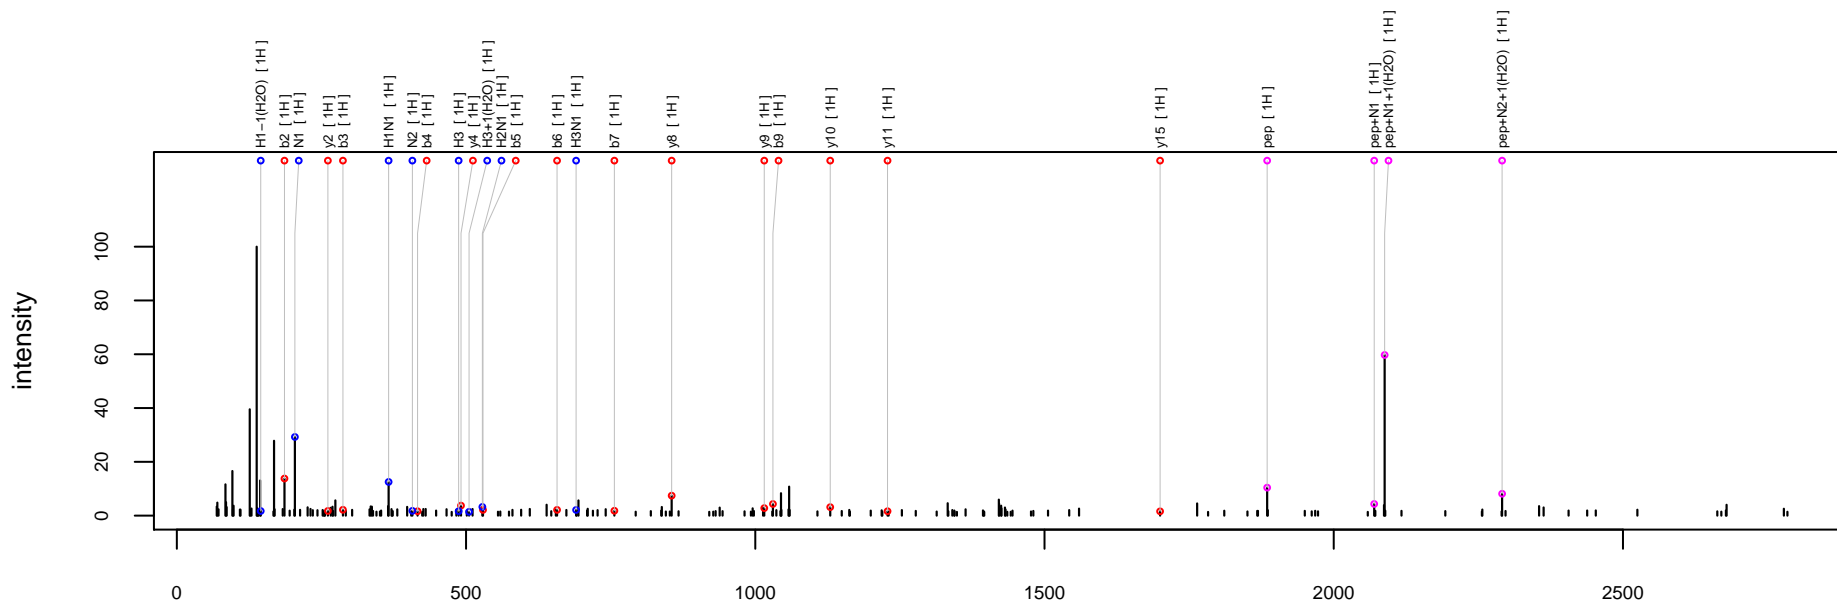

b

|    |    |    |    |    |    |    |    |   |    |    |    |    |    |    |    |    |
|----|----|----|----|----|----|----|----|---|----|----|----|----|----|----|----|----|
|    | 2  | 3  | 4  | 5  | 6  | 7  | 8  | 9 | 10 | 11 | 12 | 13 | 14 | 15 | 16 | 17 |
| G  | Q  | T  | E  | I  | Q  | V  | N  | C | P  | P  | A  | V  | T  | E  | N  | K  |
| 17 | 16 | 15 | 14 | 13 | 12 | 11 | 10 | 9 | 8  | 7  | 6  | 5  | 4  | 3  | 2  | y  |

- peptide fragments, a,b,c: N-terminal, x,y,z: C-terminal series
- glycan fragments, H:Hex, N:HexNAc, S:Neu5Ac, F:Fuc
- intact peptide and glycan fragments, pep: intact peptide
- ( ): additions
- [ ]: charge

# m/z 939.067 charge 3 scan 0-0

Score= 59.53 , Hits= 36 , Explained Intensity= 0.31

Peptide: LG3BP\_HUMAN[542,554]:AAIPSAALDTNSSK

Glycan: HHH(H(H)H)HNN, H7N2

Charge: 3H

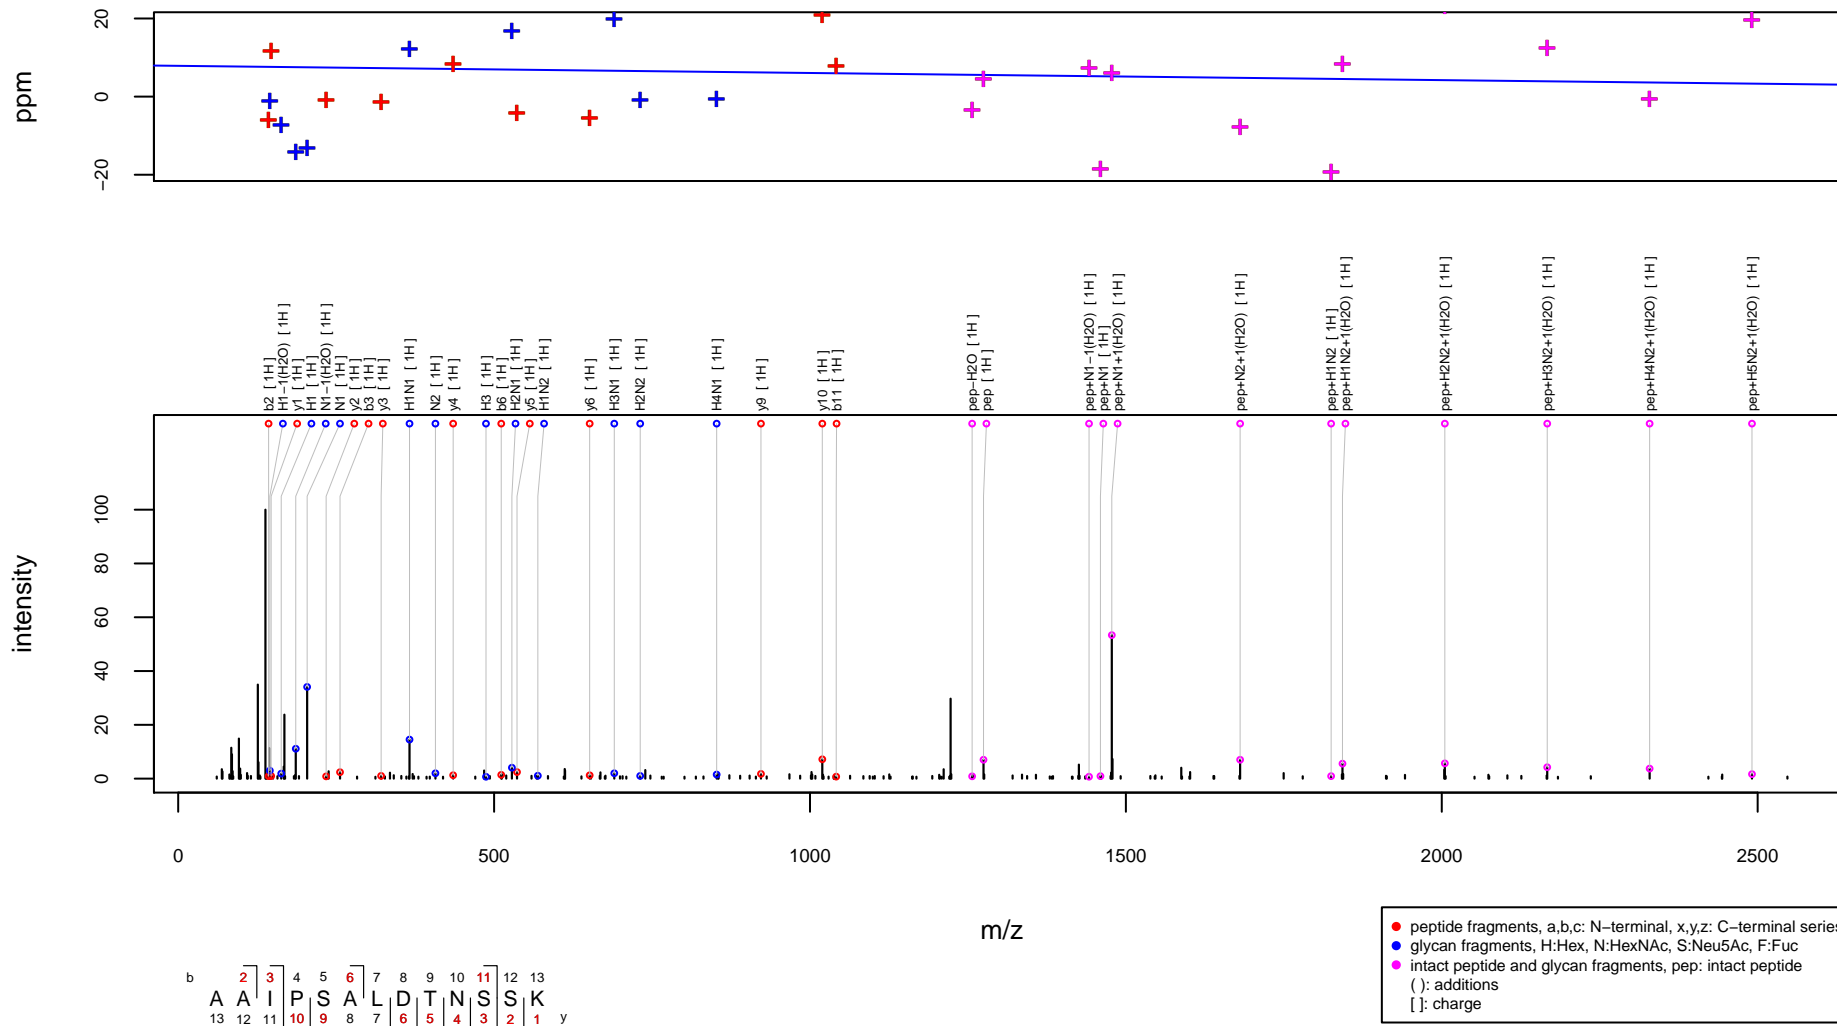

# m/z 830.368 charge 3 scan 0-0

Score= 48.77 , Hits= 29 , Explained Intensity= 0.3

Peptide: BGLR\_HUMAN[269,281]:VVANGTGTQGQLK

Glycan: H(H)H(H)HNN, H5N2

Charge: 3H

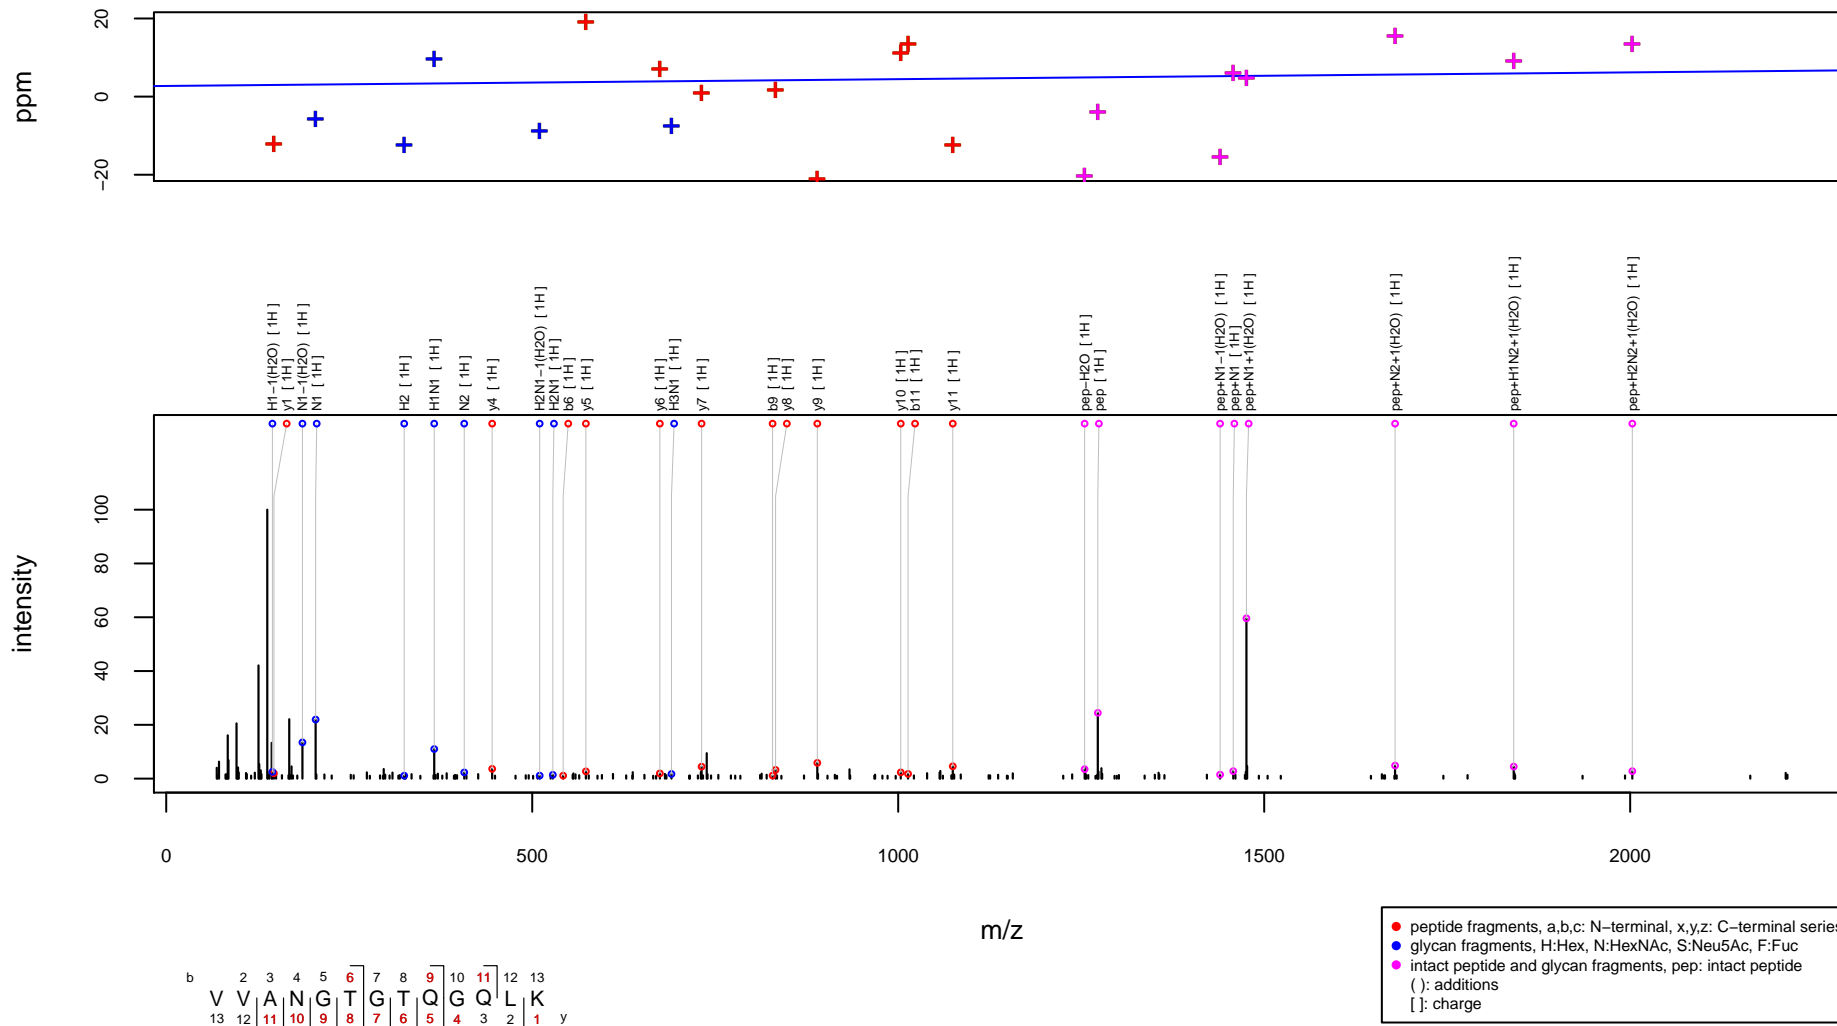

# m/z 1055.2181 charge 5 scan 0-0

Score= 39.52 , Hits= 35 , Explained Intensity= 0.29

Peptide: UROM\_HUMAN[223,245]:CNTAAPMWLNGTHPSSDEGIVSR

Glycan: S1H11N2F2

Charge: 5H

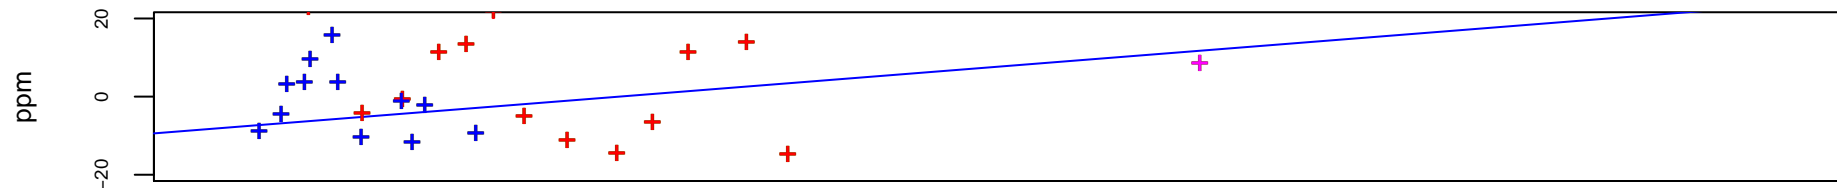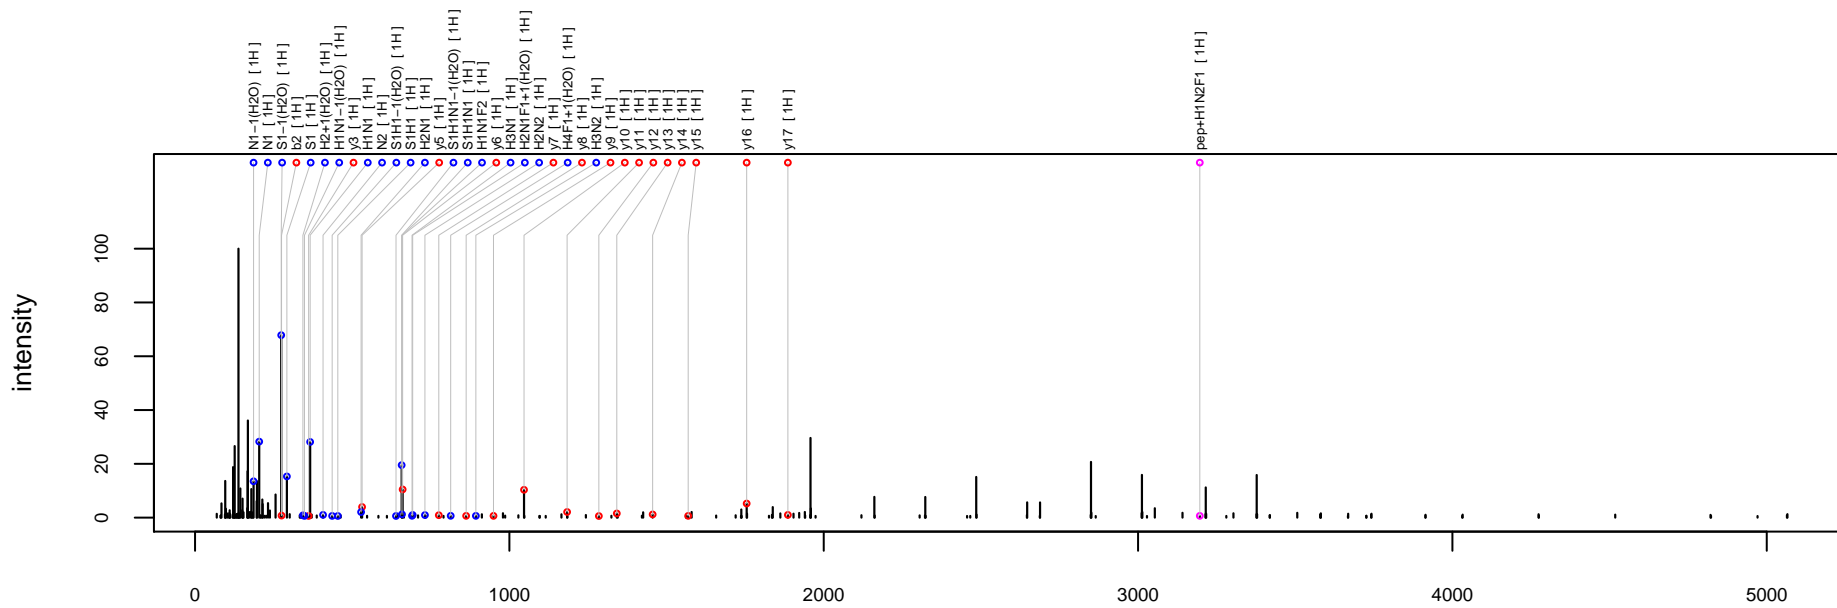

b 2 3 4 5 6 7 8 9 10 11 12 13 14 15 16 17 18 19 20 21 22 23  
 C N T A A P M W L N G T H P S S D E G I V S R  
 23 22 21 20 19 18 17 16 15 14 13 12 11 10 9 8 7 6 5 4 3 2 1 y

m/z

● peptide fragments, a,b,c: N-terminal, x,y,z: C-terminal series  
 ● glycan fragments, H:Hex, N:HexNAc, S:Neu5Ac, F:Fuc  
 ● intact peptide and glycan fragments, pep: intact peptide  
 ( ): additions  
 [ ]: charge

# m/z 1076.7827 charge 3 scan 0-0

Score= 92.33 , Hits= 63 , Explained Intensity= 0.52

Peptide: CUBN\_HUMAN[1800,1810]:EGNATGHLVGR

Glycan: FHNH(HNH)(N)HN(F)N, H5N5F2

Charge: 3H

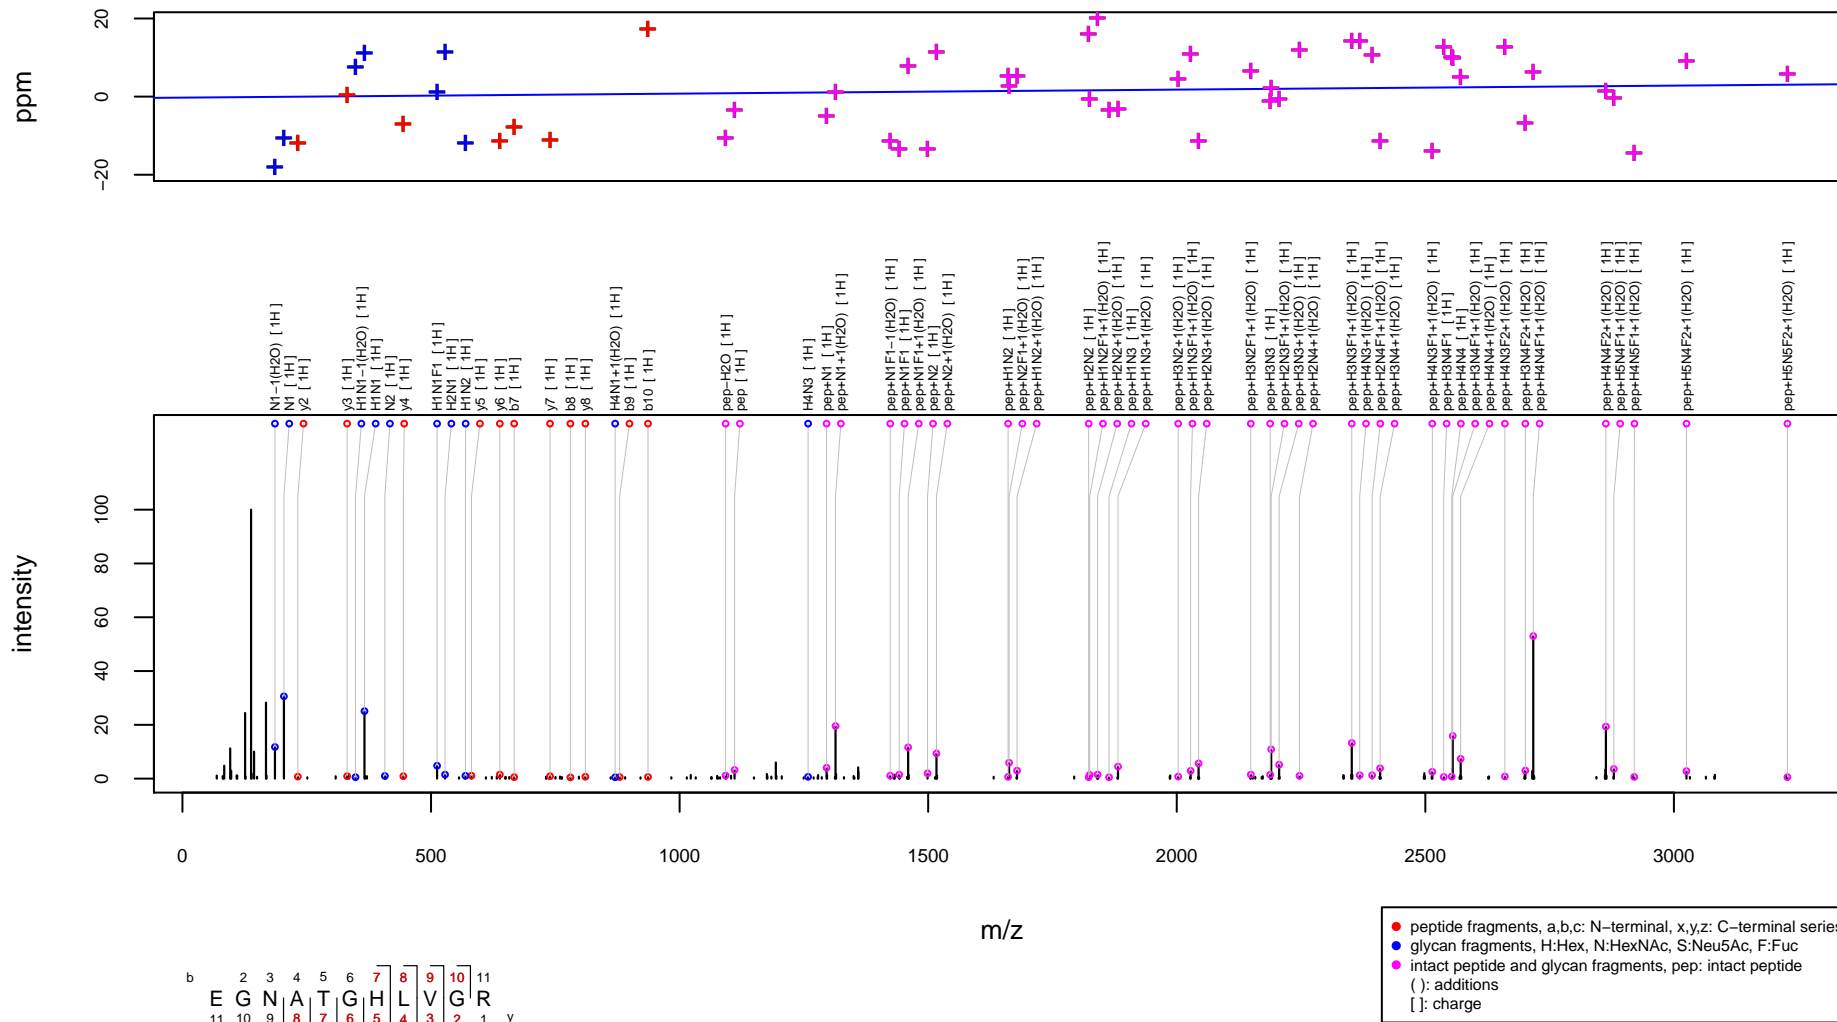

# m/z 1074.4602 charge 3 scan 0-0

Score= 62.43 , Hits= 44 , Explained Intensity= 0.43

Peptide: BGAL\_HUMAN[458,468]:NNVITLNITGK

Glycan: S1H7N3

Charge: 3H

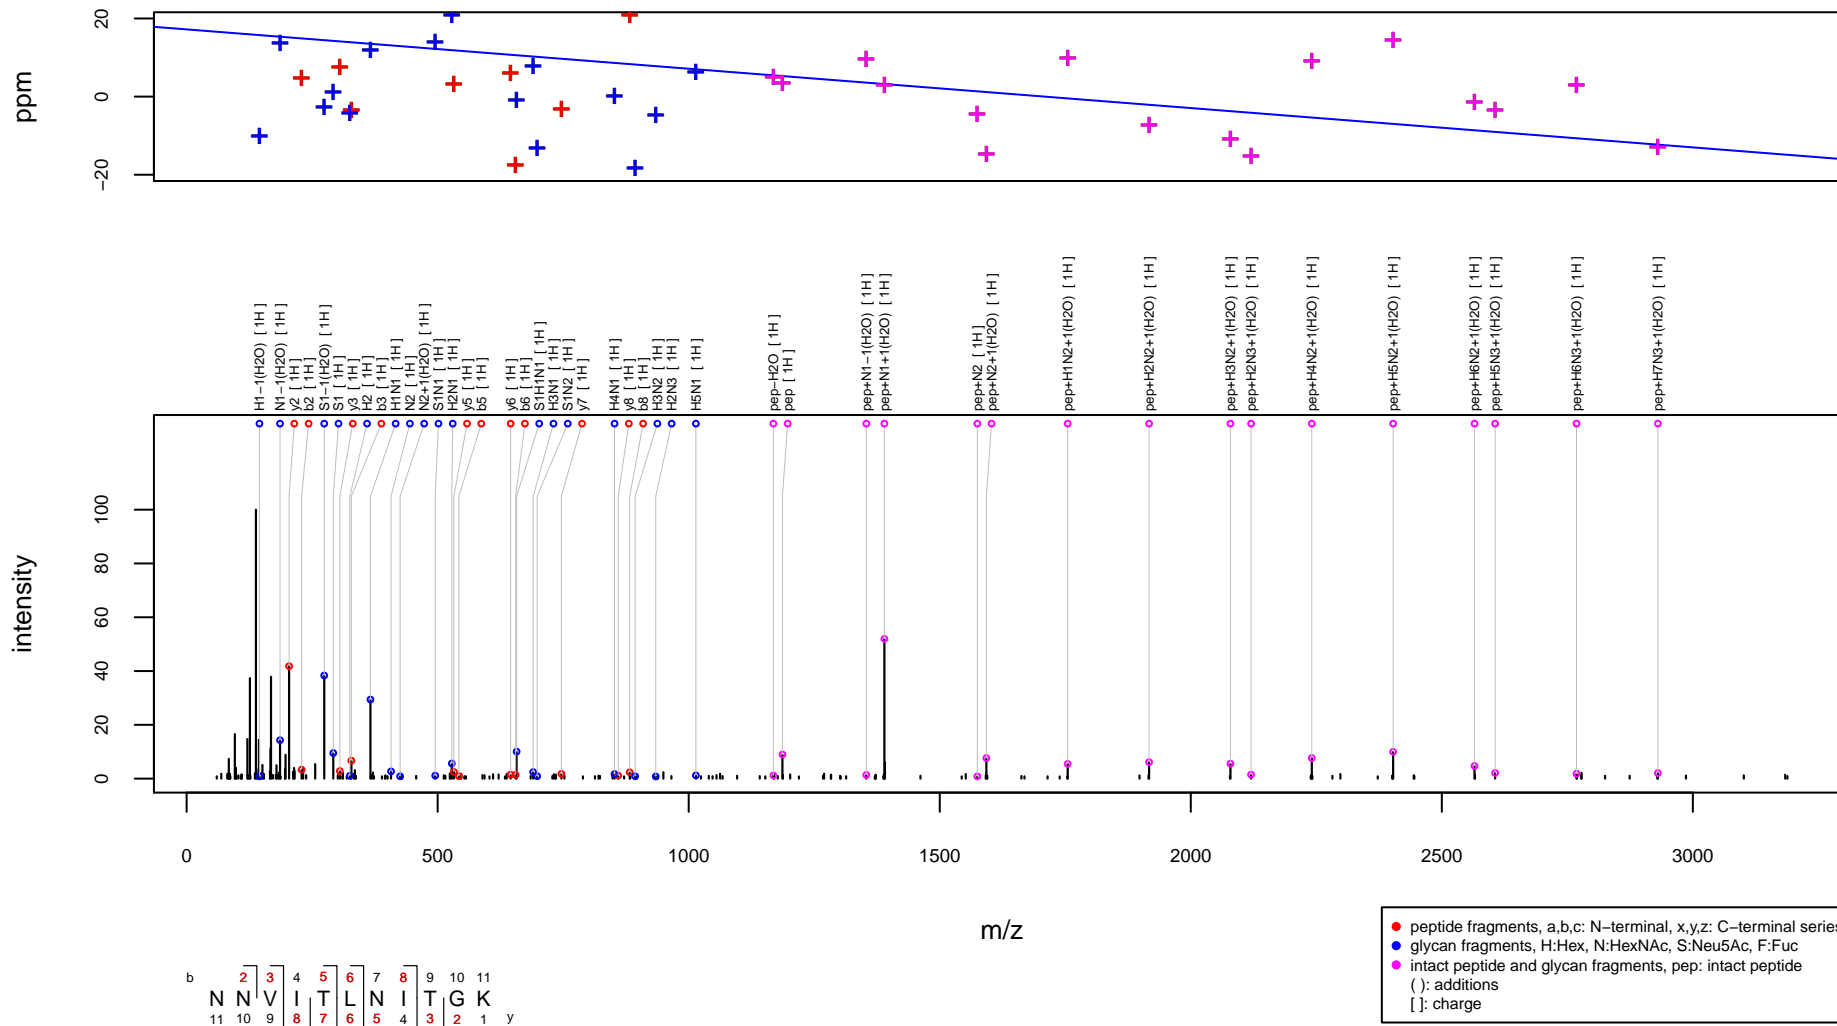



# m/z 1048.1011 charge 3 scan 0-0

Score= 72.45 , Hits= 45 , Explained Intensity= 0.49

Peptide: IGJ\_HUMAN[70,80]:ENISDPTSPLR

Glycan: SHNH(HNH)HNN, S1H5N4

Charge: 3H

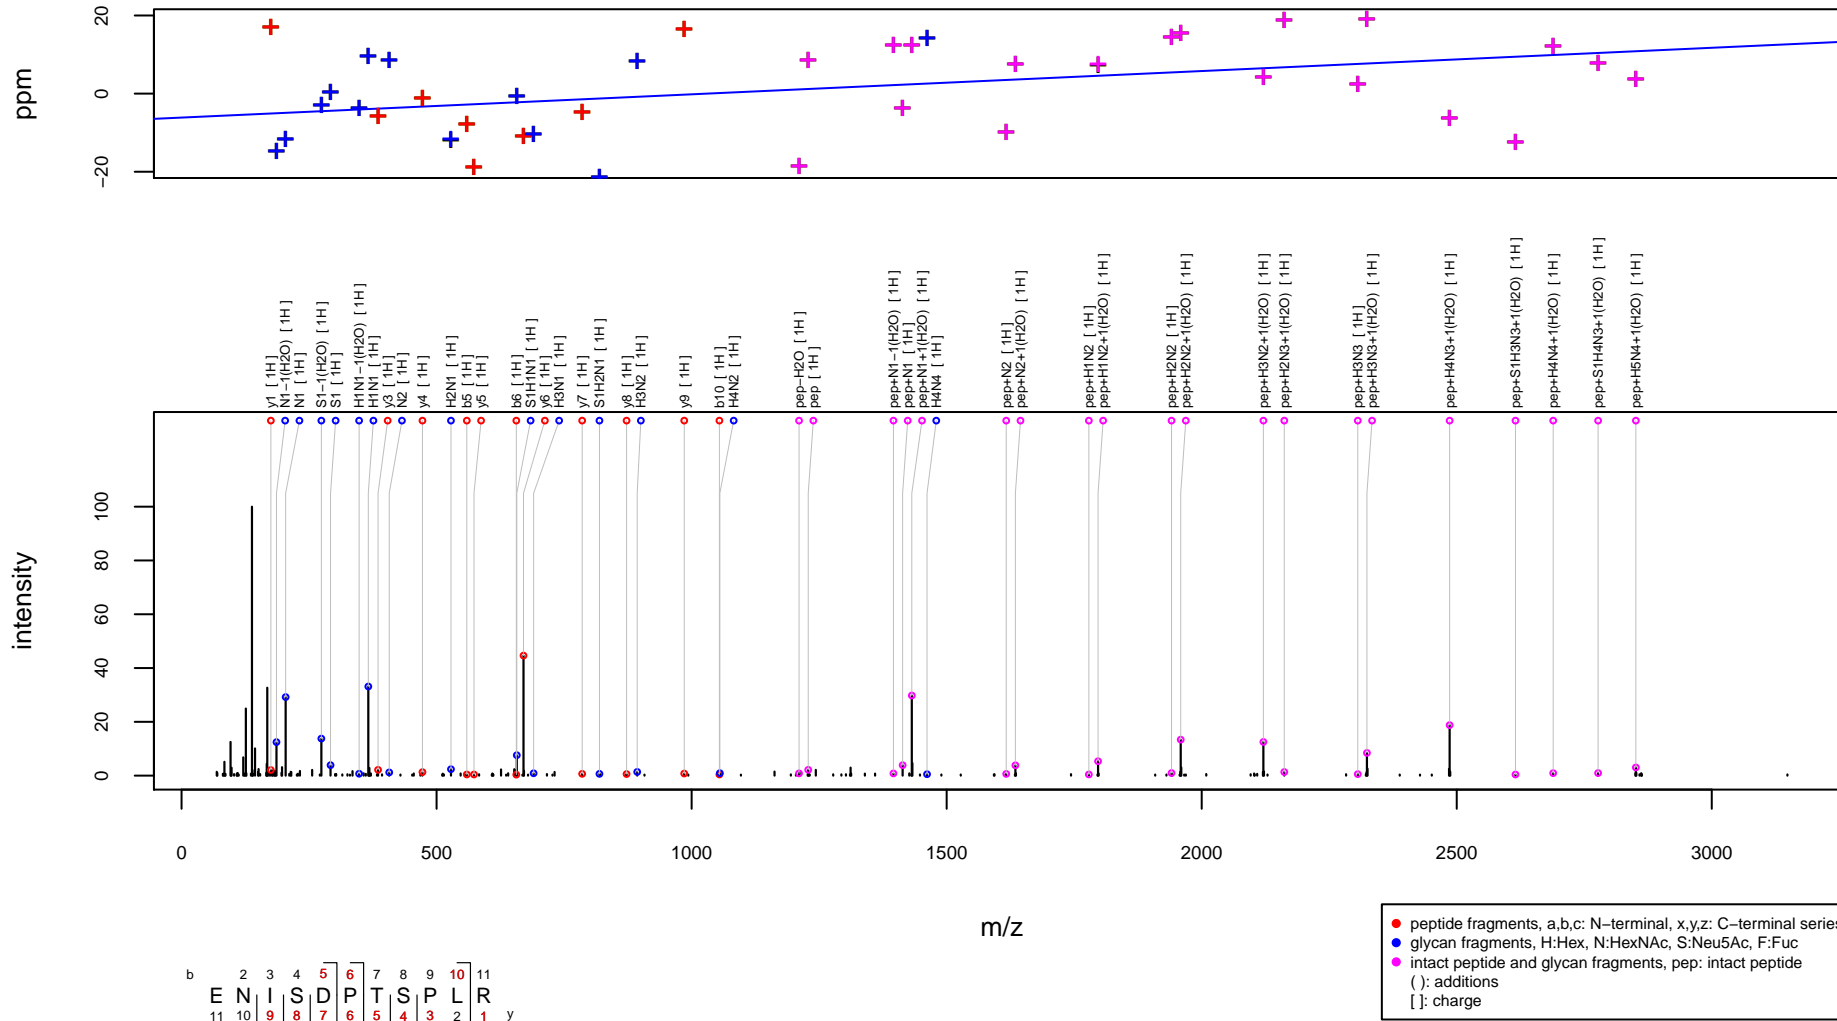



# m/z 1154.7198 charge 4 scan 0-0

Score= 38.18 , Hits= 33 , Explained Intensity= 0.27

Peptide: UROM\_HUMAN[223,245]:CNTAAPMWLNGLTHPSSDEGIVSR

Glycan: S2H3N3F3

Charge: 4H

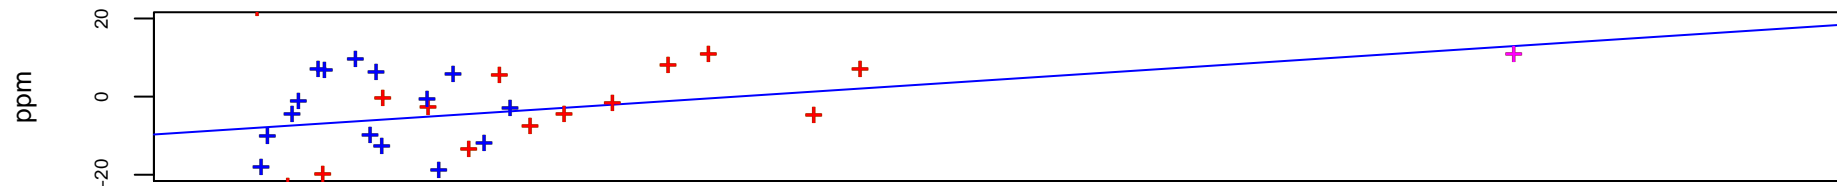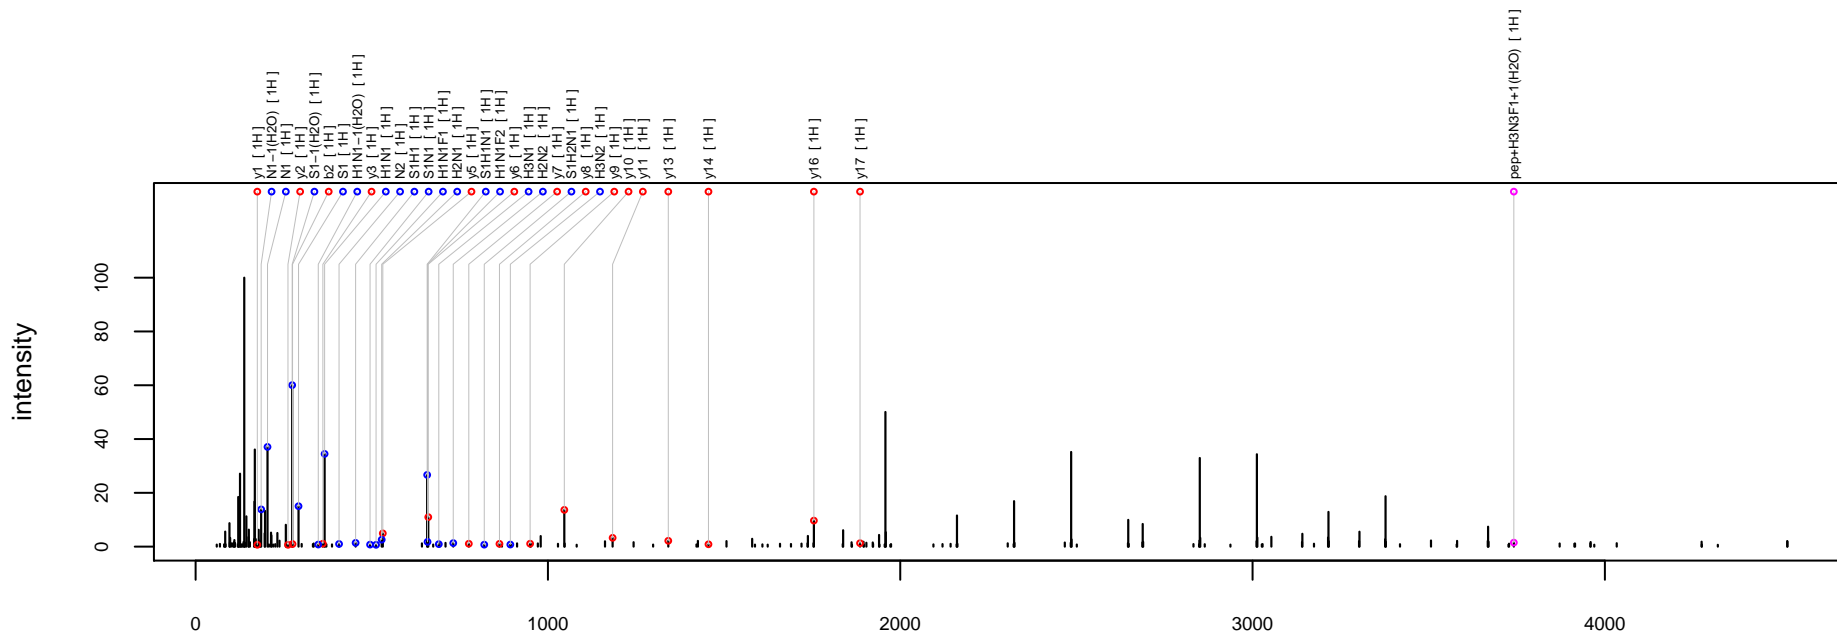

b 2 3 4 5 6 7 8 9 10 11 12 13 14 15 16 17 18 19 20 21 22 23  
 C N T A A P M W L N G T H P S S D E G I V S R  
 23 22 21 20 19 18 17 16 15 14 13 12 11 10 9 8 7 6 5 4 3 2 1 y

● peptide fragments, a,b,c: N-terminal, x,y,z: C-terminal series  
 ● glycan fragments, H:Hex, N:HexNAc, S:Neu5Ac, F:Fuc  
 ● intact peptide and glycan fragments, pep: intact peptide  
 ( ): additions  
 [ ]: charge

# m/z 1278.1936 charge 3 scan 0-0

Score= 76.59 , Hits= 64 , Explained Intensity= 0.49

Peptide: CUBN\_HUMAN[2526,2537]:LCSSVNVSEIK

Glycan: H6N6F2

Charge: 3H

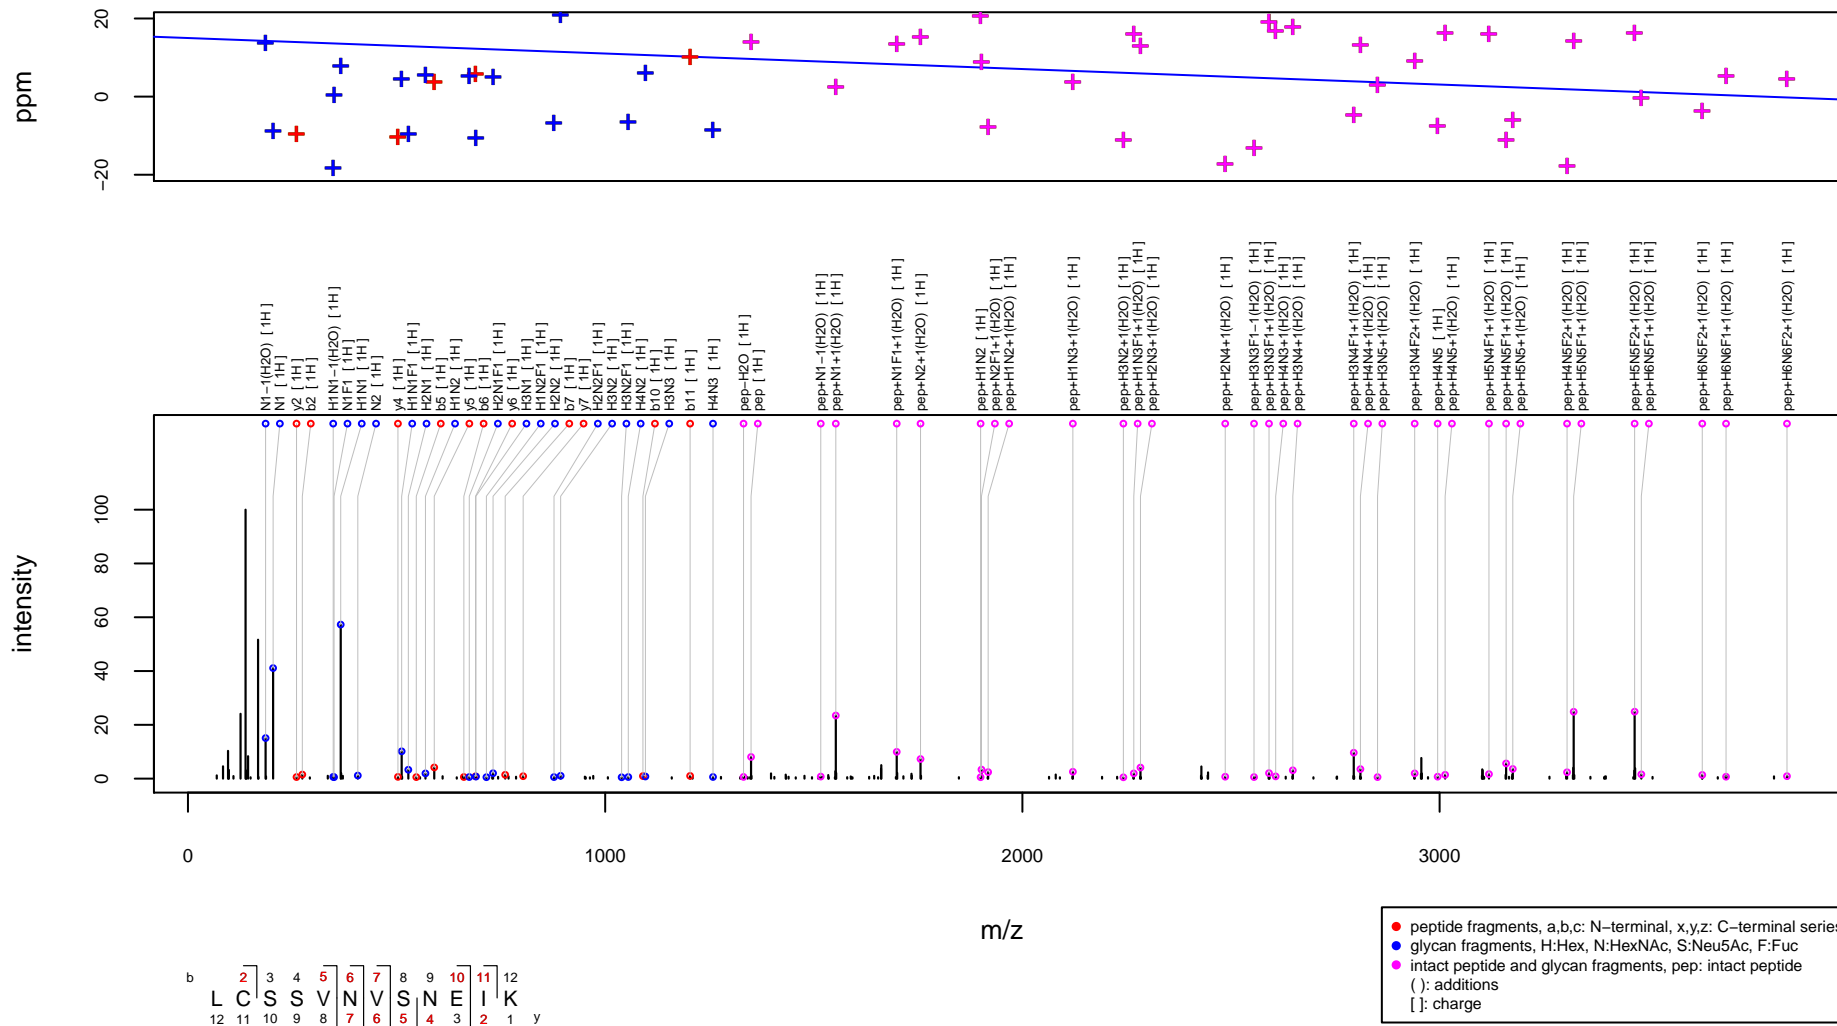

# m/z 995.4046 charge 4 scan 0-0

Score= 49.1 , Hits= 47 , Explained Intensity= 0.33

Peptide: CUBN\_HUMAN[2526,2537]:LCSSVNVSEIK

Glycan: H6N6F3

Charge: 4H

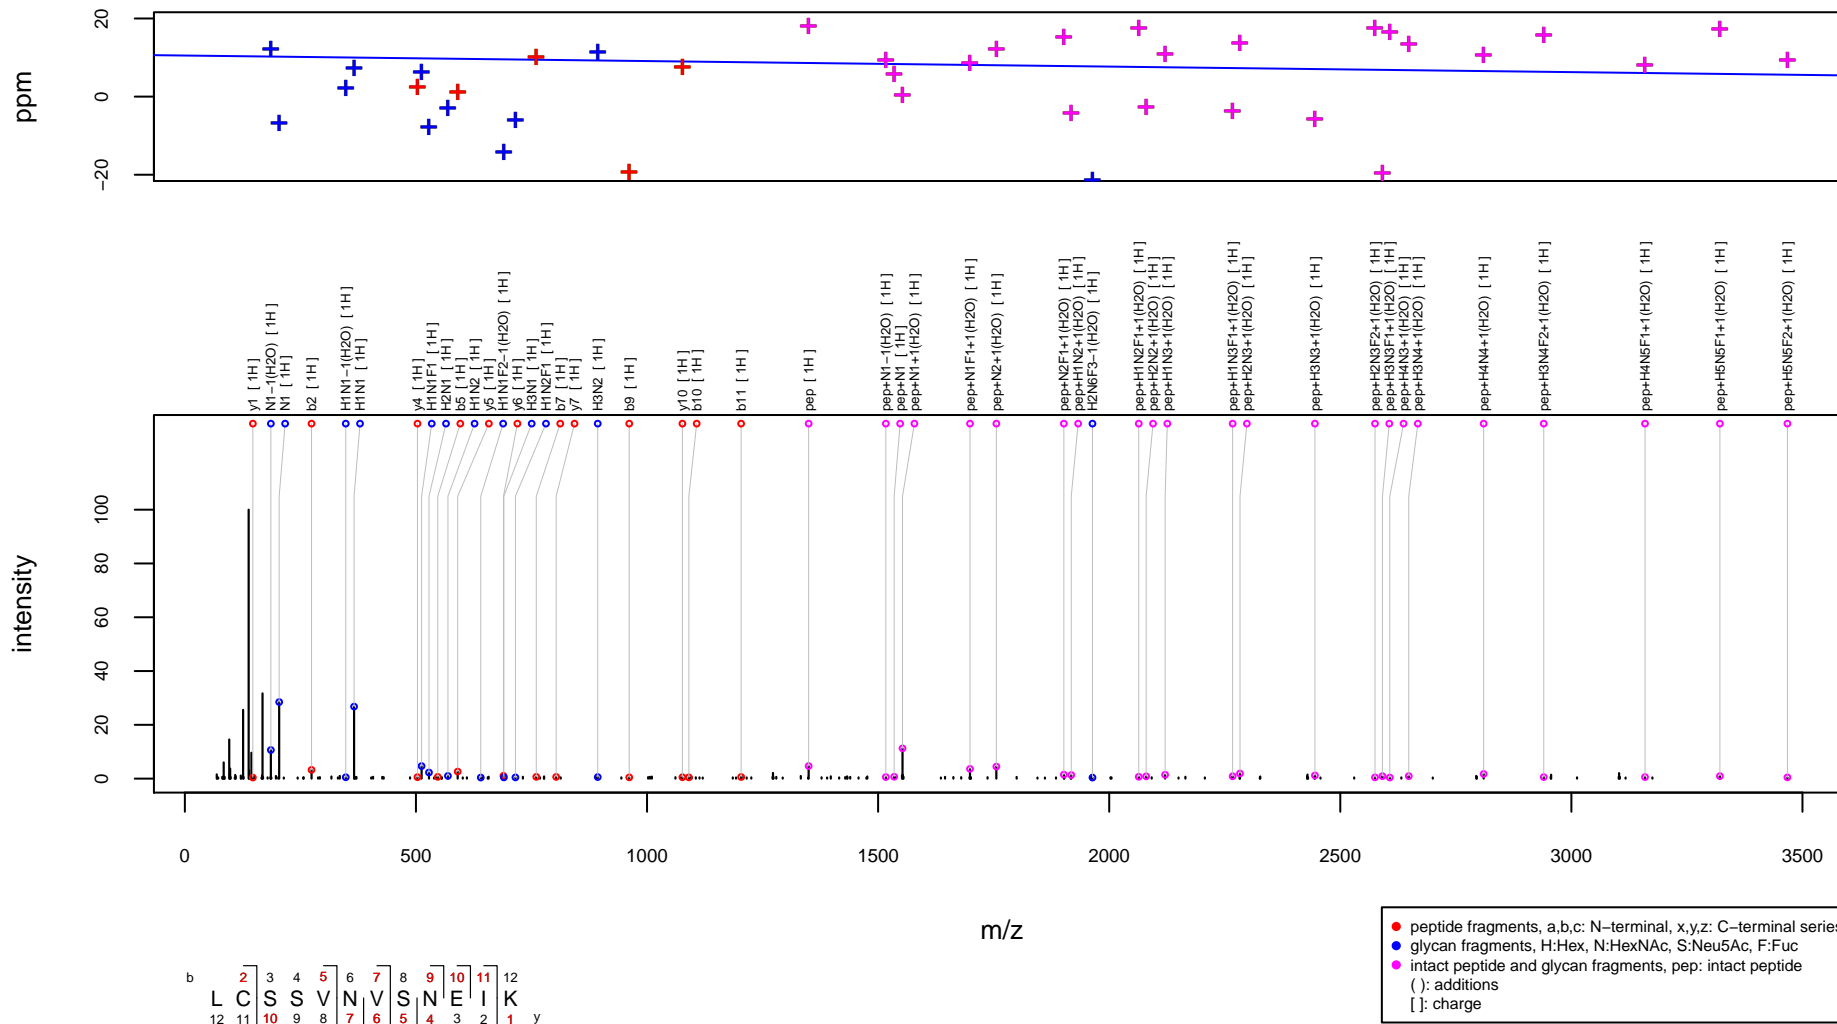

# m/z 1053.1787 charge 4 scan 0-0

Score= 54.27 , Hits= 48 , Explained Intensity= 0.37

Peptide: LG3BP\_HUMAN[542,554]:AAIPSAALDTNSSK

Glycan: S2H7N6

Charge: 4H

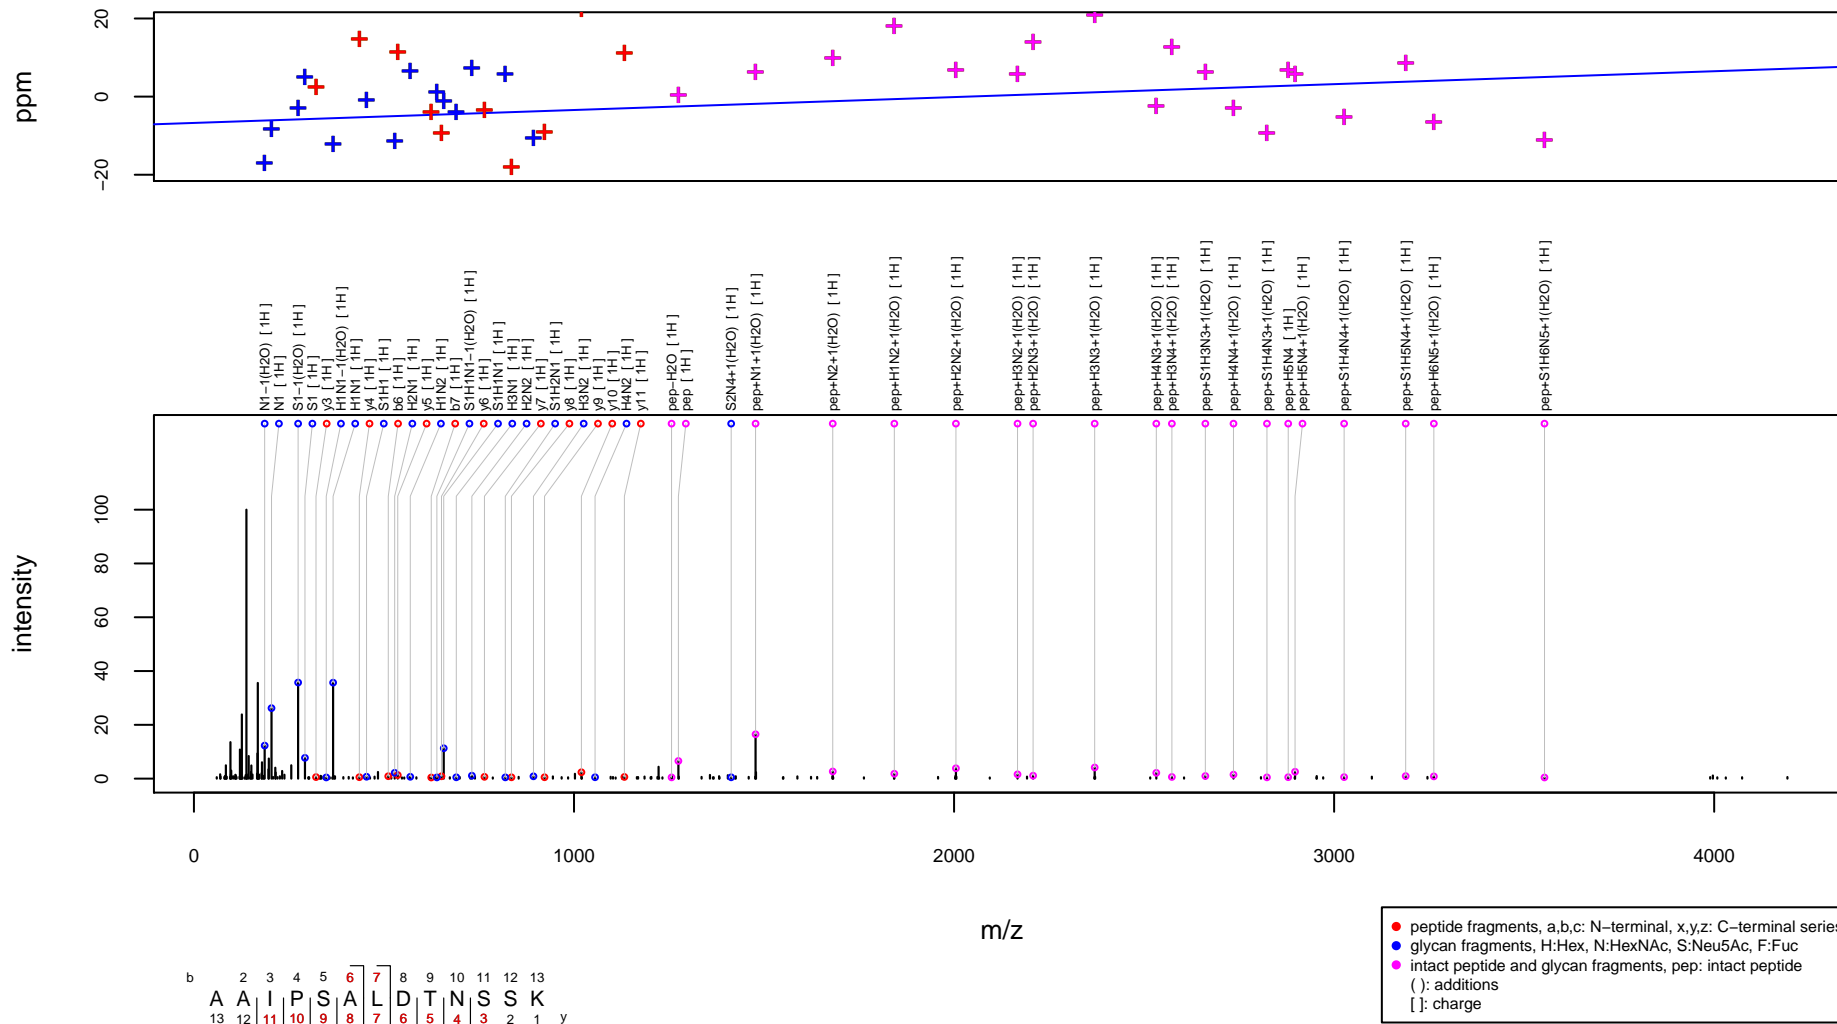

# m/z 1107.8015 charge 3 scan 0-0

Score= 65.72 , Hits= 45 , Explained Intensity= 0.38  
 Peptide: CUBN\_HUMAN[2526,2537]:LCSSVNVSN EIK  
 Glycan: HNH(HNH)(N)HN(F)N, H5N5F1  
 Charge: 3H

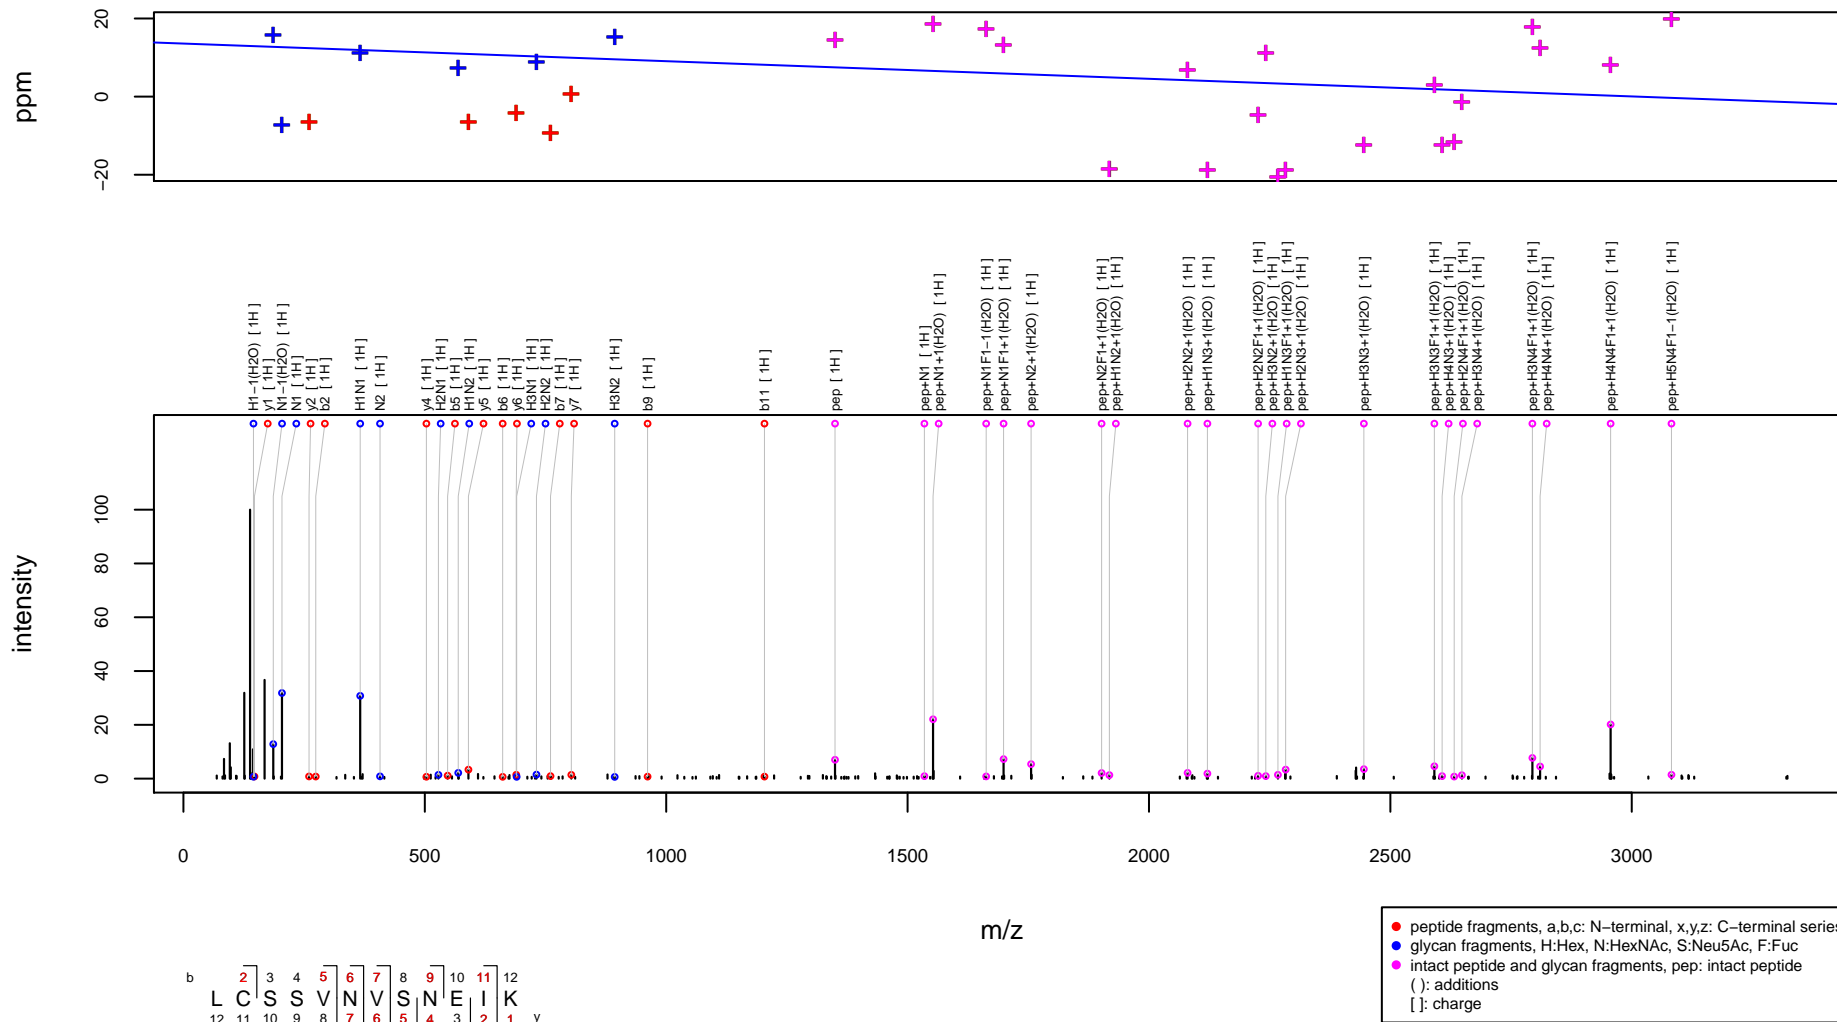





# m/z 1074.478 charge 3 scan 0-0

Score= 69.68 , Hits= 51 , Explained Intensity= 0.37

Peptide: IGHA2\_HUMAN[200,208]:TPLTANITK

Glycan: SHNH(HNH)(N)HN(F)N, S1H5N5F1

Charge: 3H

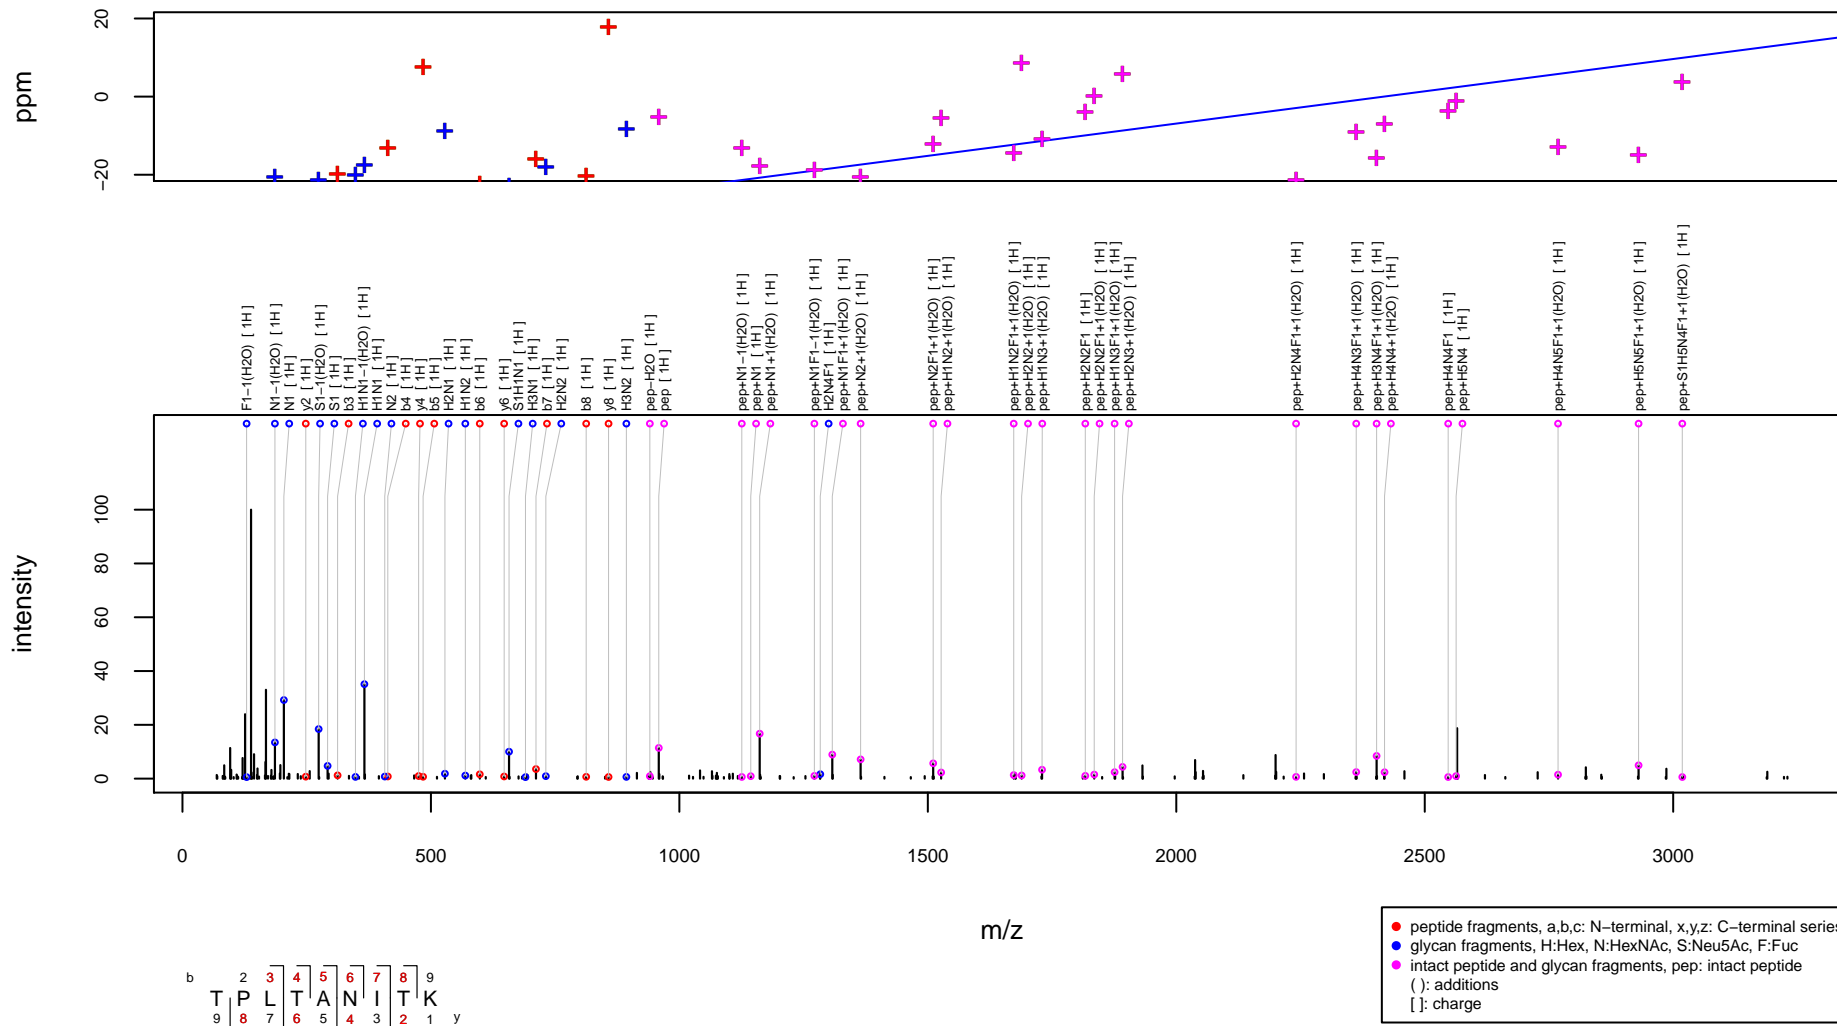

# m/z 1258.5253 charge 3 scan 0-0

Score= 73.75 , Hits= 52 , Explained Intensity= 0.48

Peptide: LG3BP\_HUMAN[542,554]:AAIPSAALDTNSK

Glycan: HN(HN)H(HN(HN)H)HN(F)N, H7N6F1

Charge: 3H

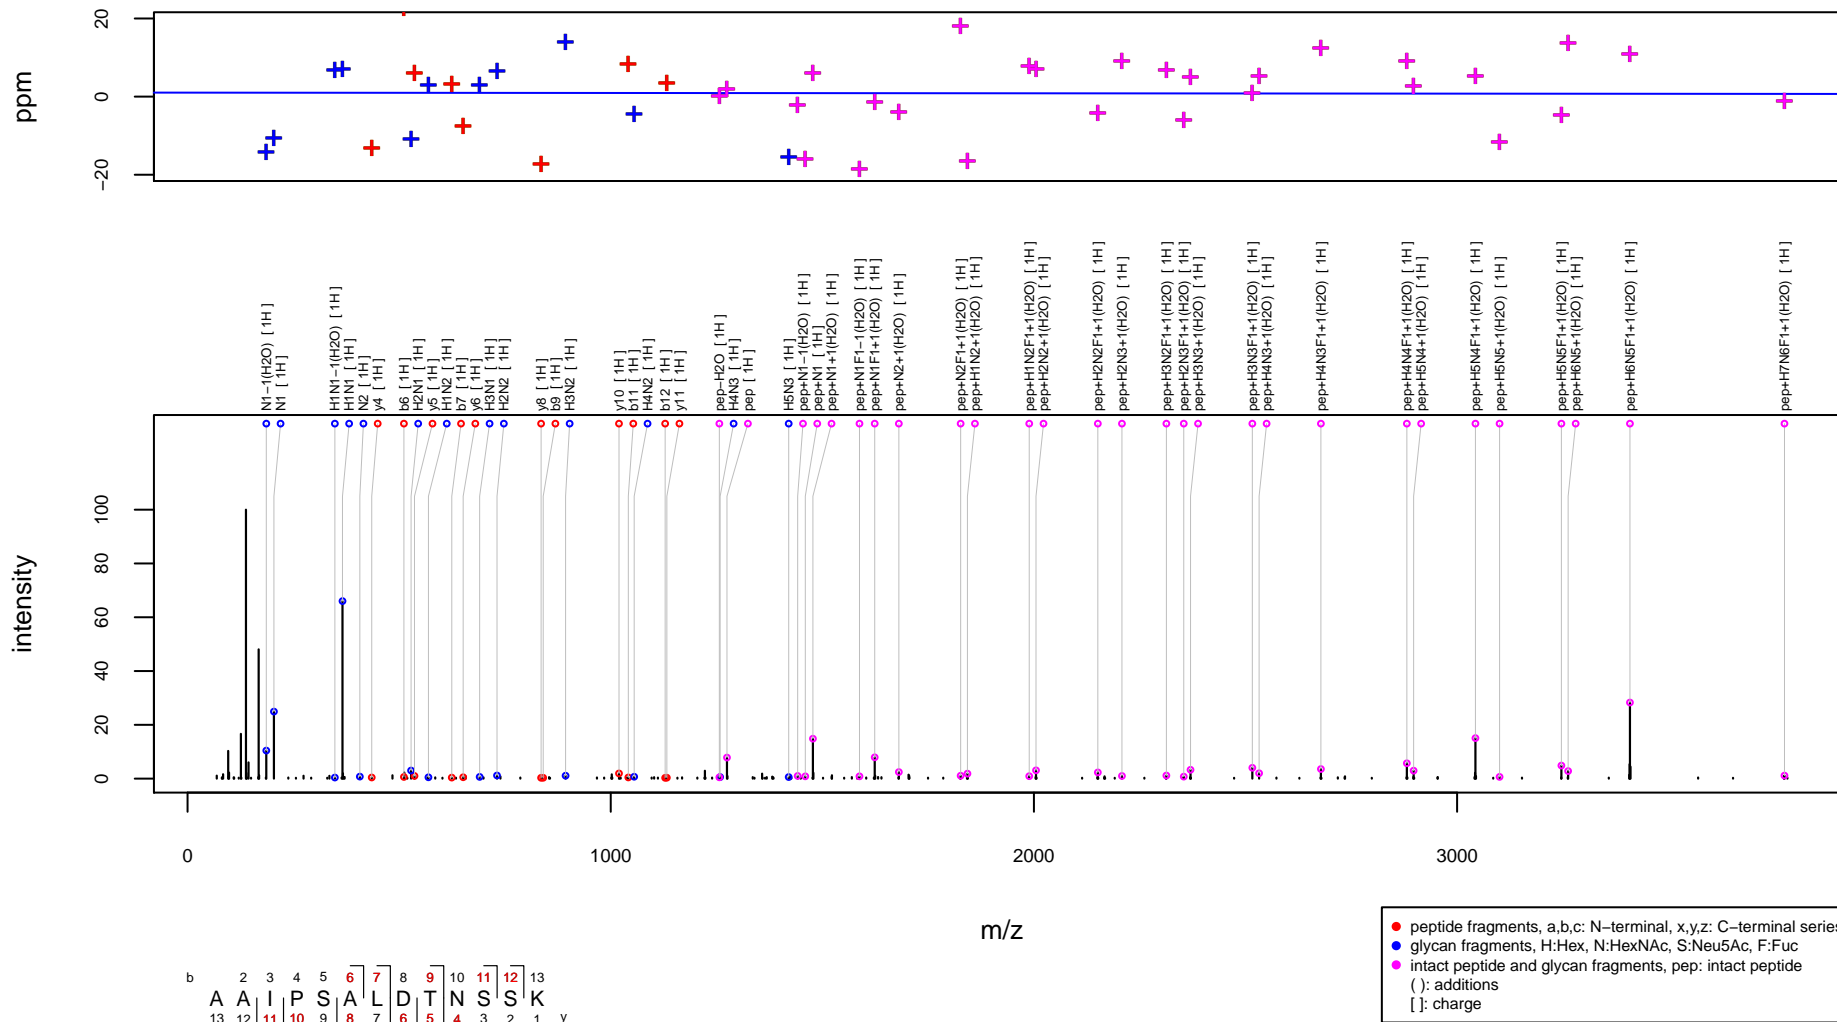

# m/z 976.3981 charge 4 scan 0-0

Score= 52.32 , Hits= 35 , Explained Intensity= 0.31

Peptide: PIGR\_HUMAN[498,515]:WNNTGQCALPSQDEGPSK

Glycan: SHNH(HNH)HNN, S1H5N4

Charge: 4H

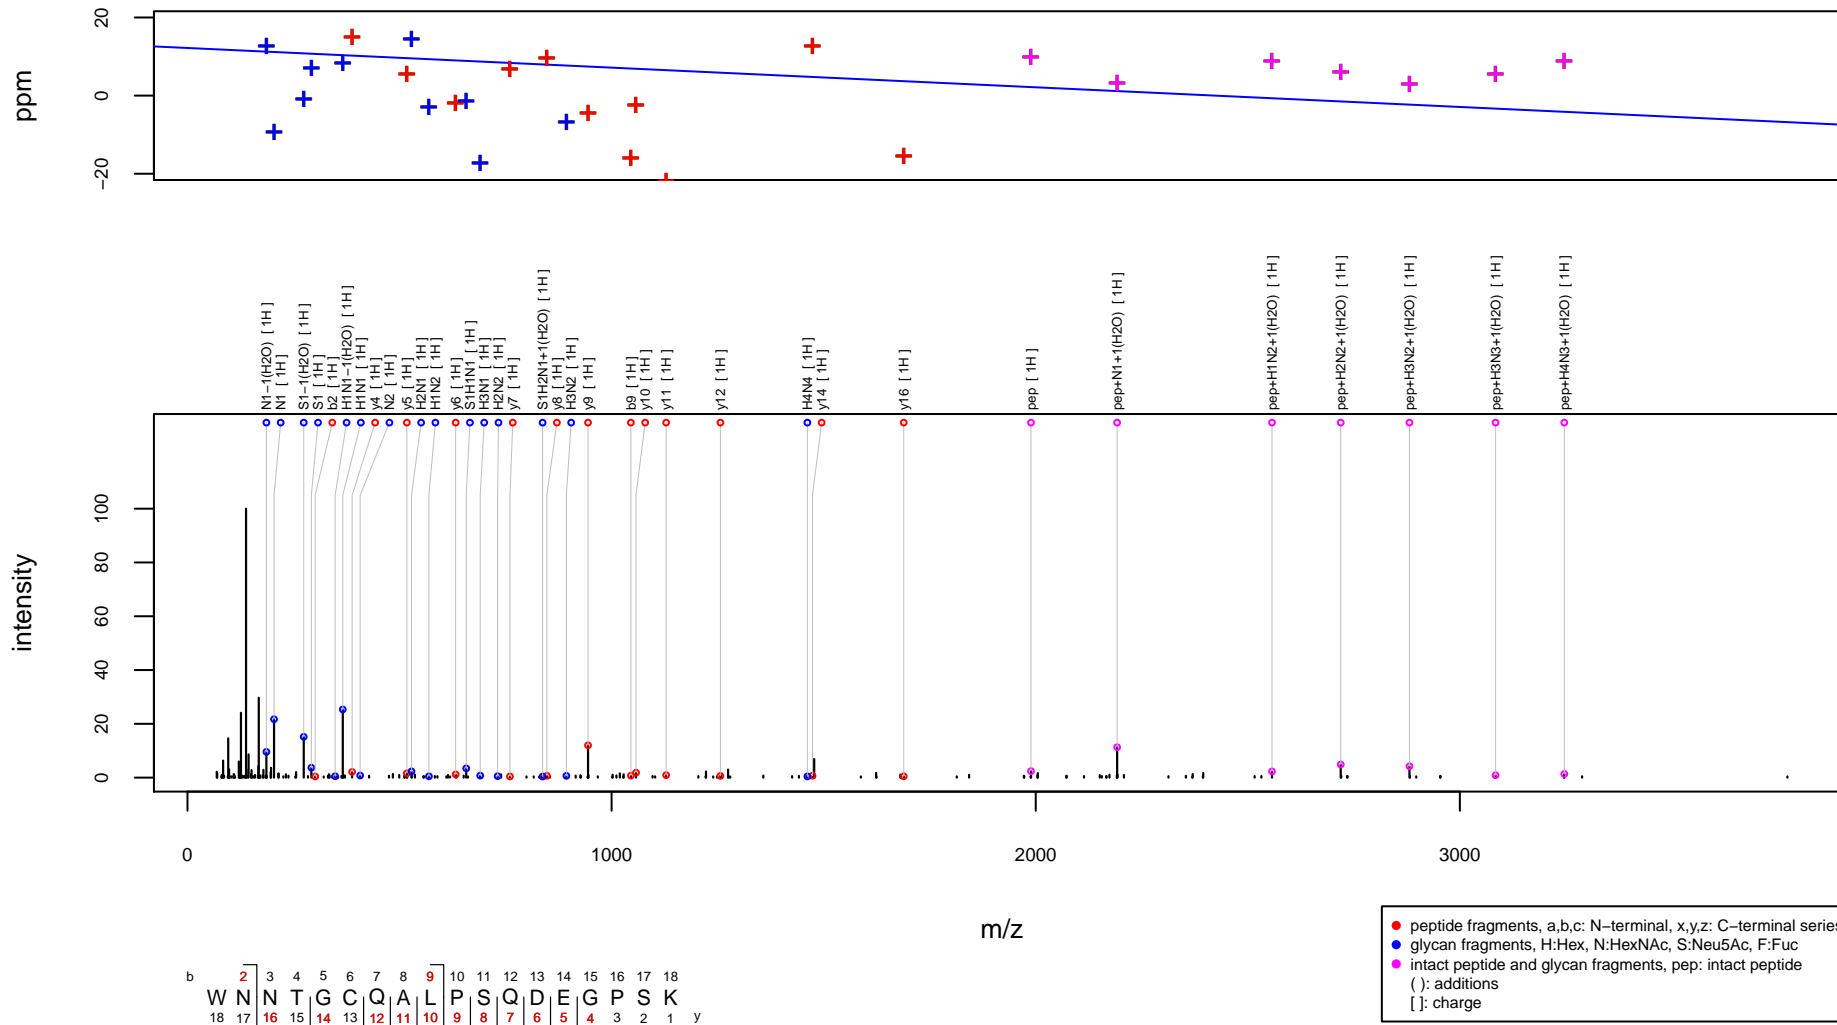

# m/z 1136.8113 charge 3 scan 0-0

Score= 74.93 , Hits= 51 , Explained Intensity= 0.41

Peptide: LG3BP\_HUMAN[542,554]:AAIP<sup>3</sup>SALD<sup>7</sup>TNS<sup>11</sup>SK

Glycan: HNH(HN(HN)H)HN(F)N, H6N5F1

Charge: 3H

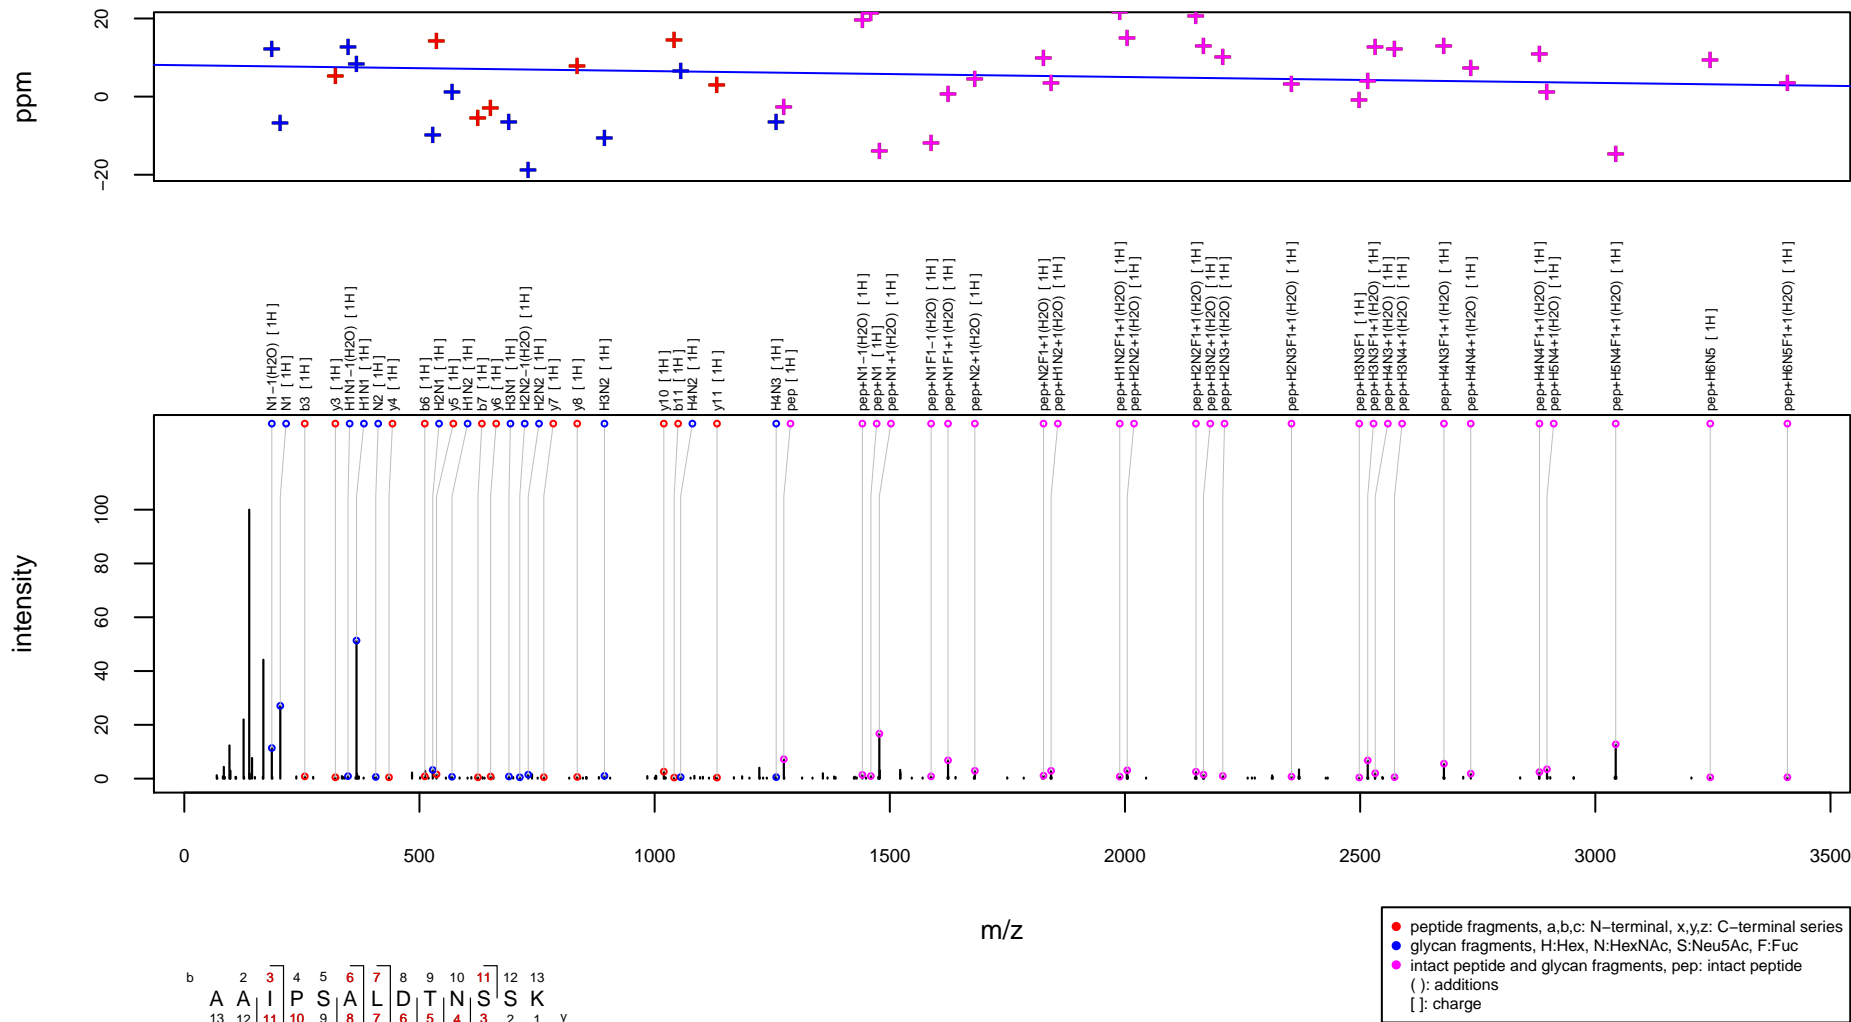

# m/z 1112.1368 charge 3 scan 0-0

Score= 74.36 , Hits= 51 , Explained Intensity= 0.46

Peptide: LG3BP\_HUMAN[542,554]:AAIP<sup>6</sup>SAL<sup>7</sup>DT<sup>8</sup>NS<sup>11</sup>SK<sup>12</sup>

Glycan: SHNH(HNH)HN(F)N, S1H5N4F1

Charge: 3H

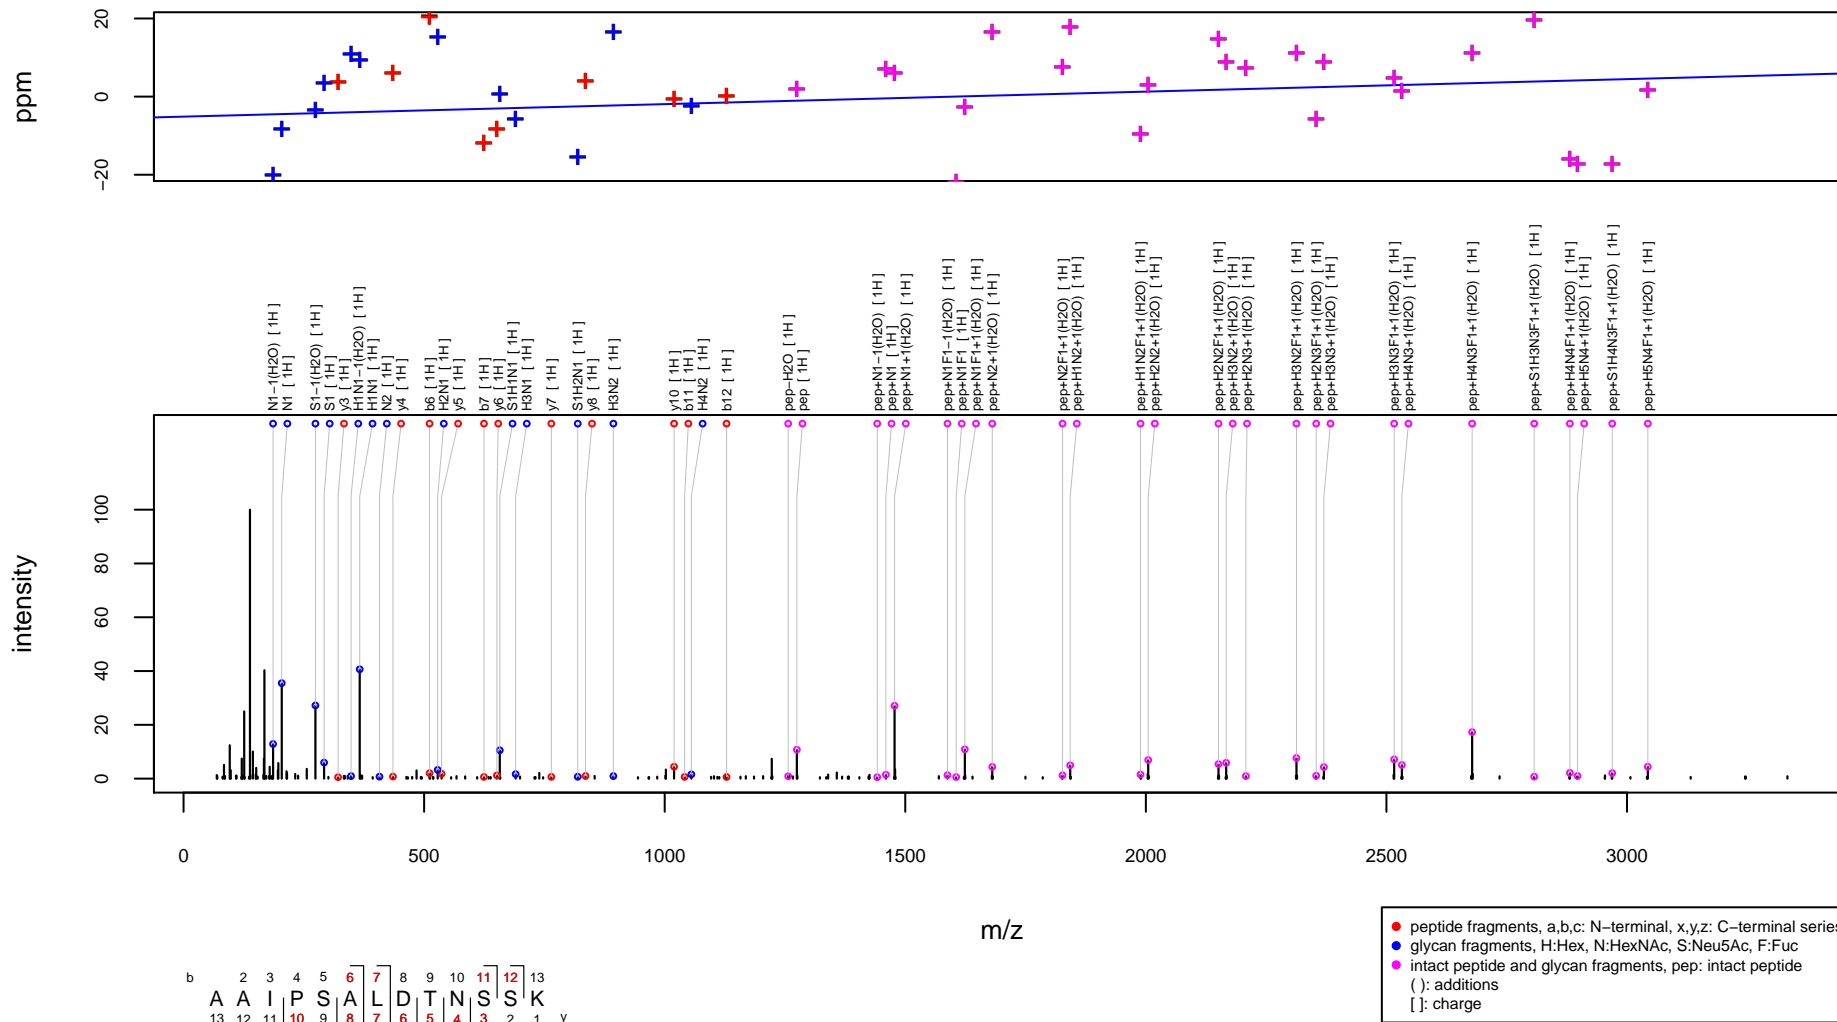

# m/z 1082.7946 charge 3 scan 0-0

Score= 79.97 , Hits= 54 , Explained Intensity= 0.39  
 Peptide: LG3BP\_HUMAN[542,554]:AAIPSAALDTNISK  
 Glycan: HNH(HNH)(N)HN(F)N, H5N5F1  
 Charge: 3H

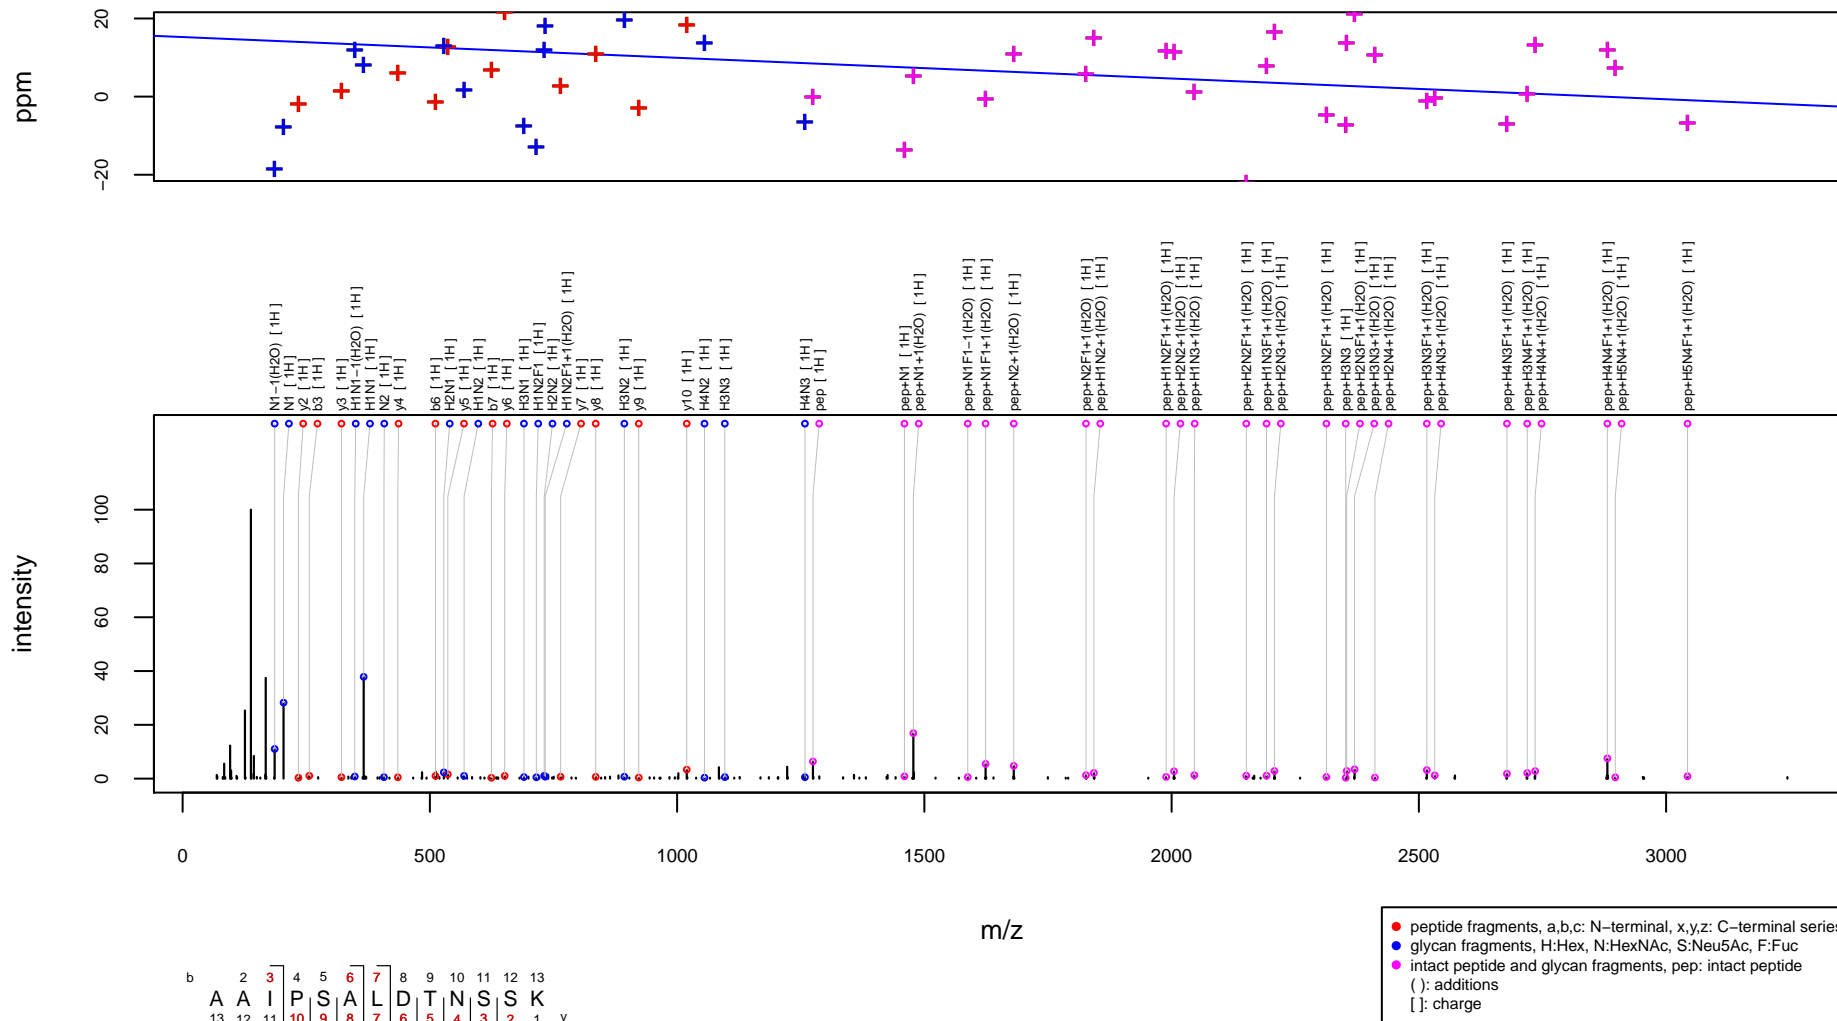

# m/z 1063.446 charge 3 scan 0-0

Score= 60.24 , Hits= 43 , Explained Intensity= 0.39

Peptide: LG3BP\_HUMAN[542,554]:AAIPSAALDTNSK

Glycan: S1H5N4

Charge: 3H

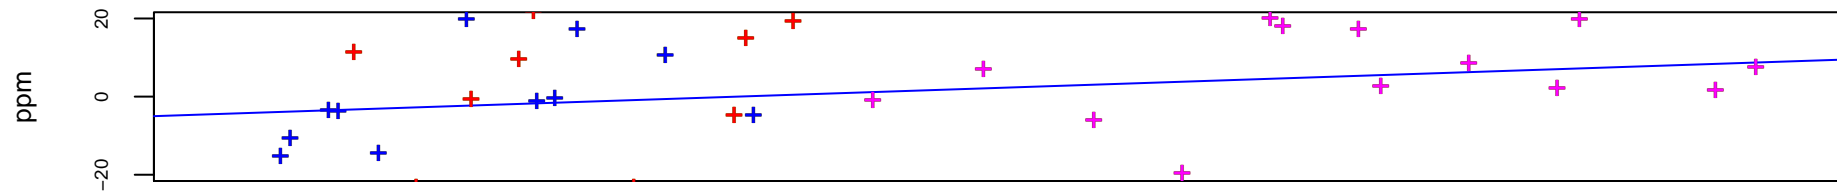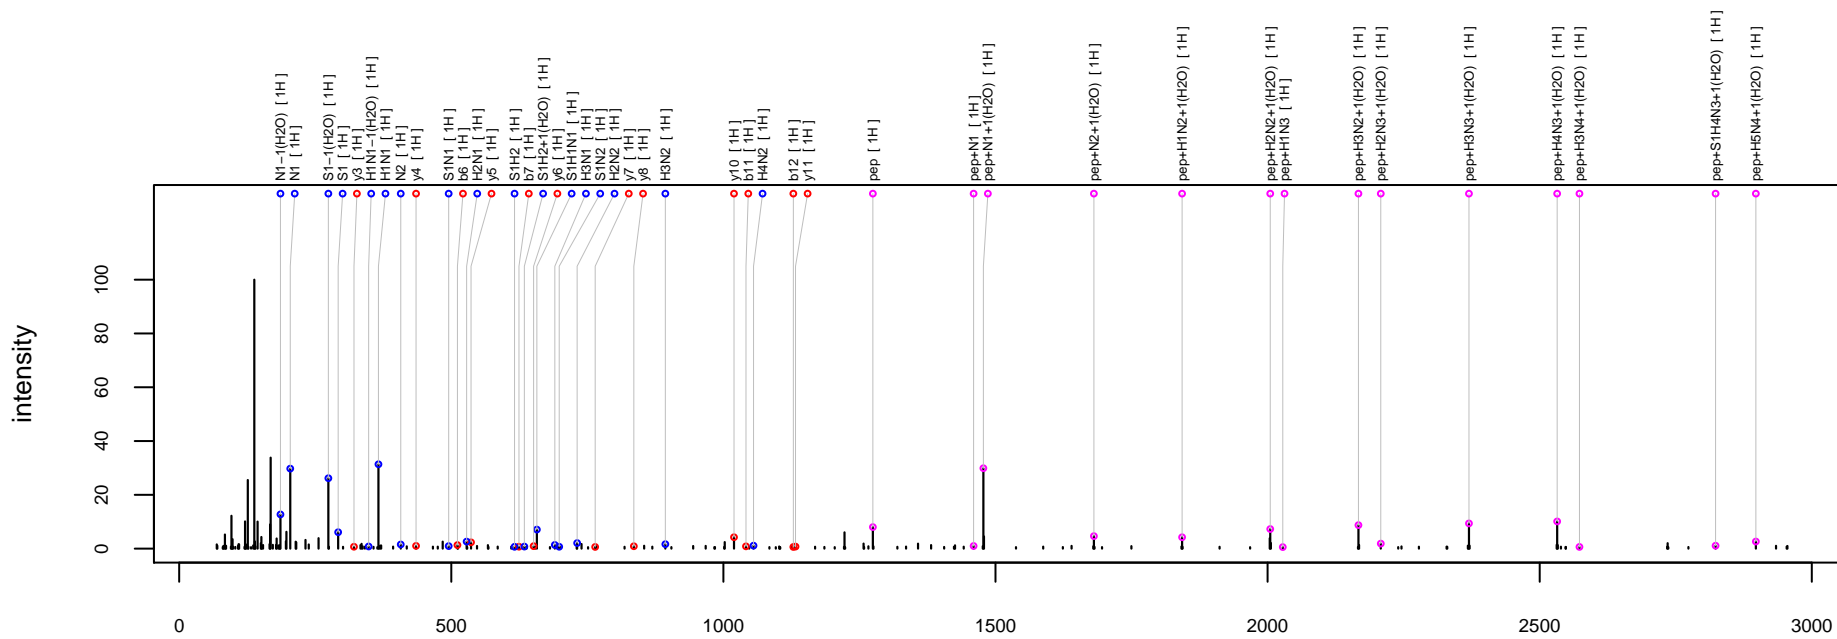

b    2   3   4   5   6   7   8   9   10   11   12   13  
 A   A   I   P   S   A   L   D   T   N   S   S   K  
 13 12 11 10 9 8 7 6 5 4 3 2 1 y

● peptide fragments, a,b,c: N-terminal, x,y,z: C-terminal series  
 ● glycan fragments, H:Hex, N:HexNAc, S:Neu5Ac, F:Fuc  
 ● intact peptide and glycan fragments, pep: intact peptide  
 ( ): additions  
 [ ]: charge

# m/z 866.8555 charge 4 scan 0-0

Score= 49.11 , Hits= 32 , Explained Intensity= 0.31

Peptide: VASN\_HUMAN[112,121]:LHEITNETFR

Glycan: SHNH(SHNH)HNN, S2H5N4

Charge: 4H

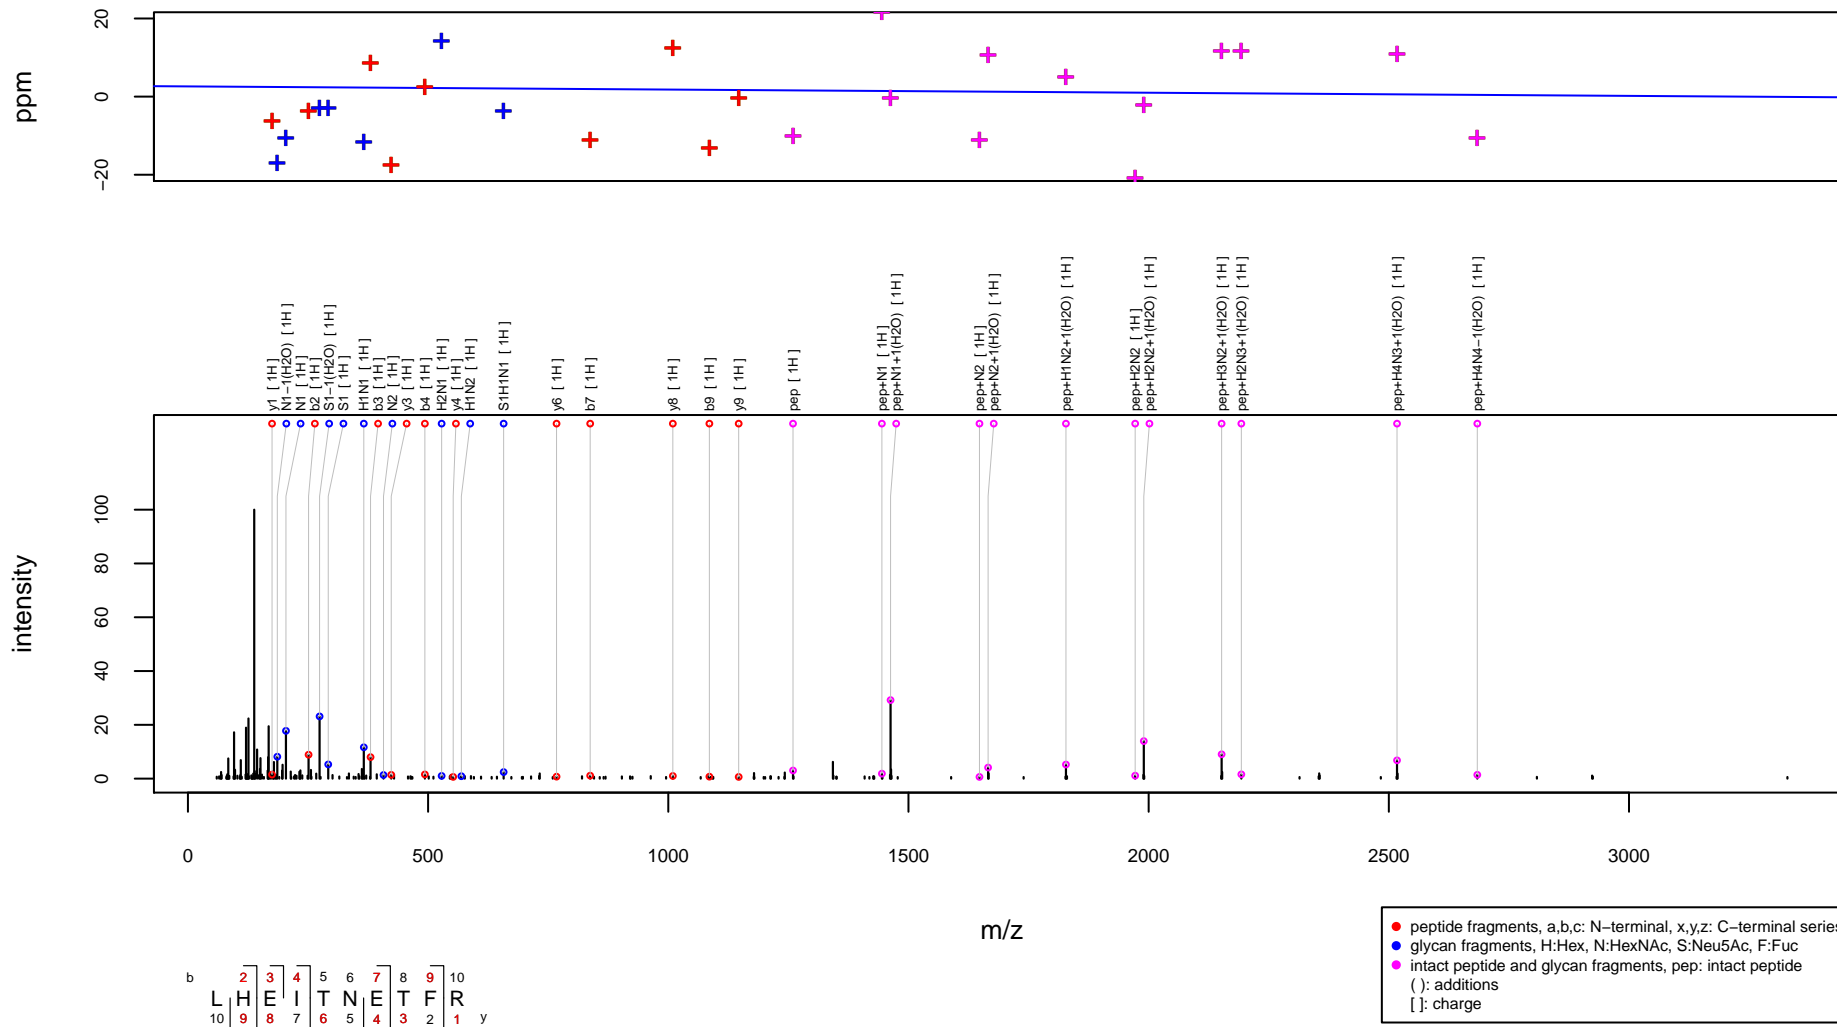



# m/z 1025.18 charge 4 scan 0-0

Score= 54.83 , Hits= 36 , Explained Intensity= 0.32

Peptide: CERU\_HUMAN[129,144]:EHEGAIYPDNTTDFQR

Glycan: SHNH(SHNH)HNN, S2H5N4

Charge: 4H

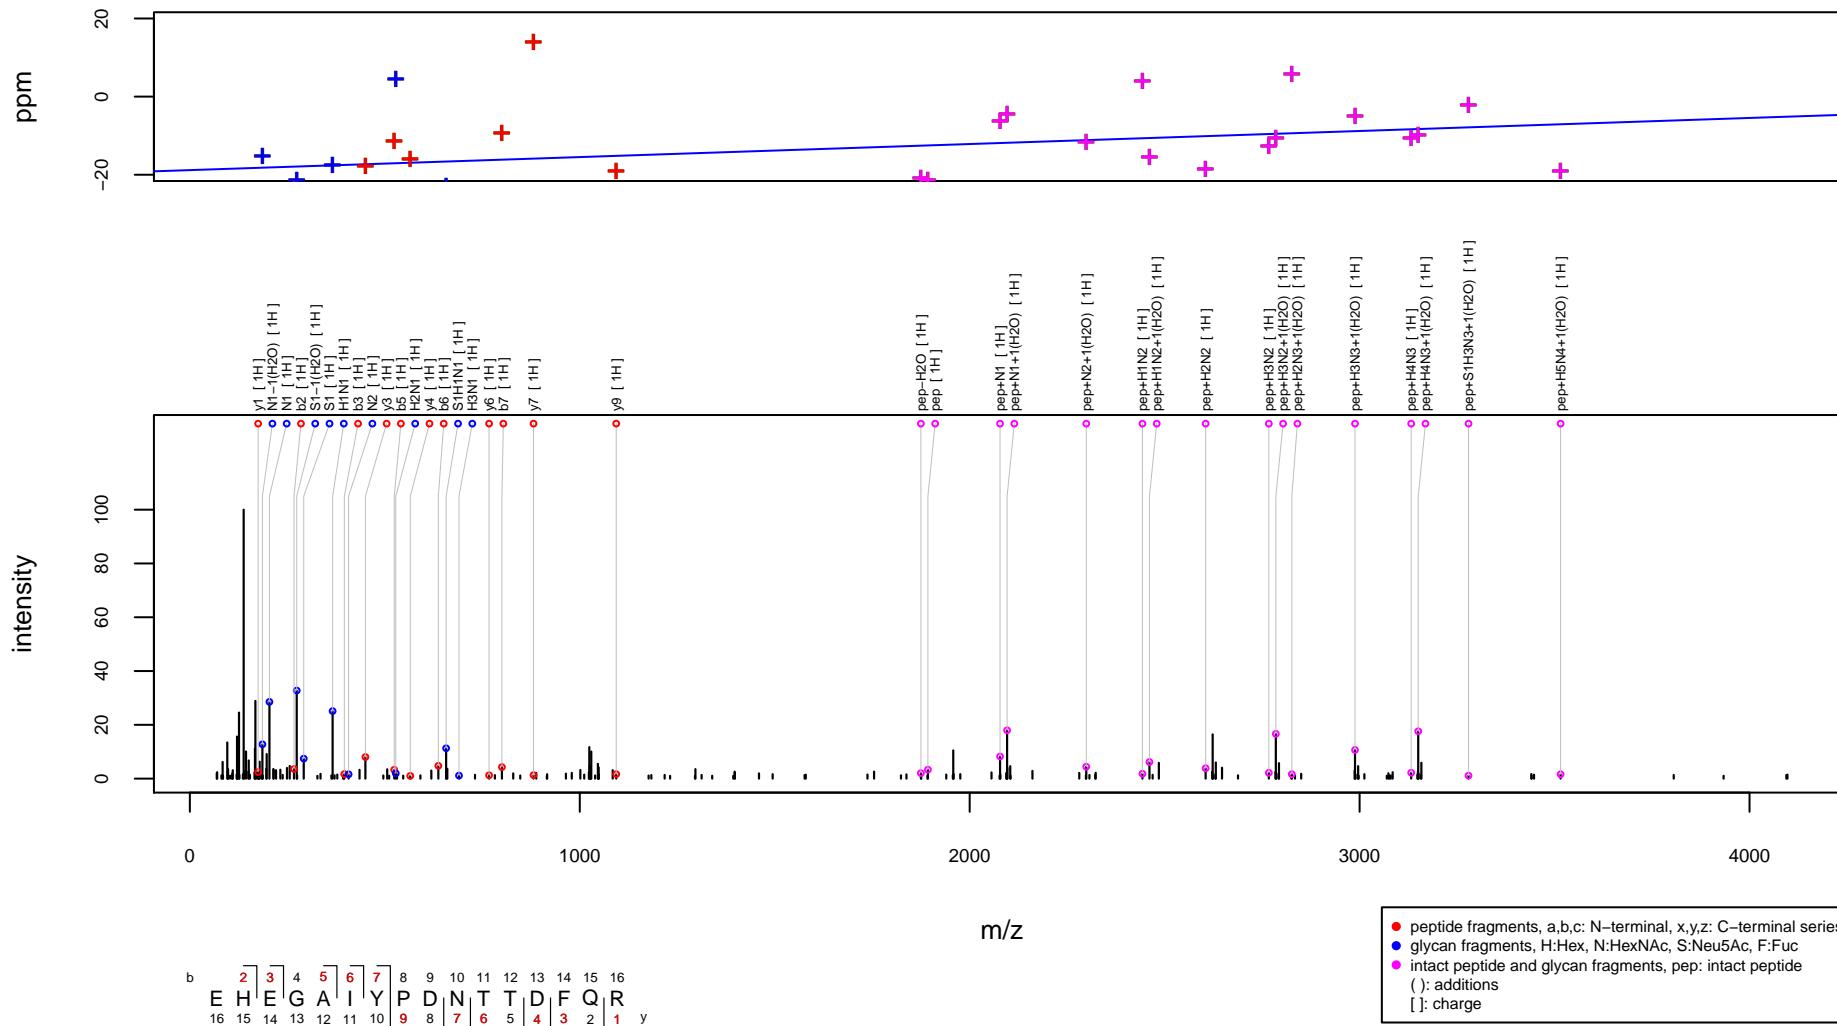



# m/z 844.3534 charge 4 scan 0-0

Score= 66.29 , Hits= 49 , Explained Intensity= 0.22

Peptide: CUBN\_HUMAN[1800,1810]:EGNATGHLVGR

Glycan: FHNH(FHNH)(N)HN(F)N, H5N5F3

Charge: 4H

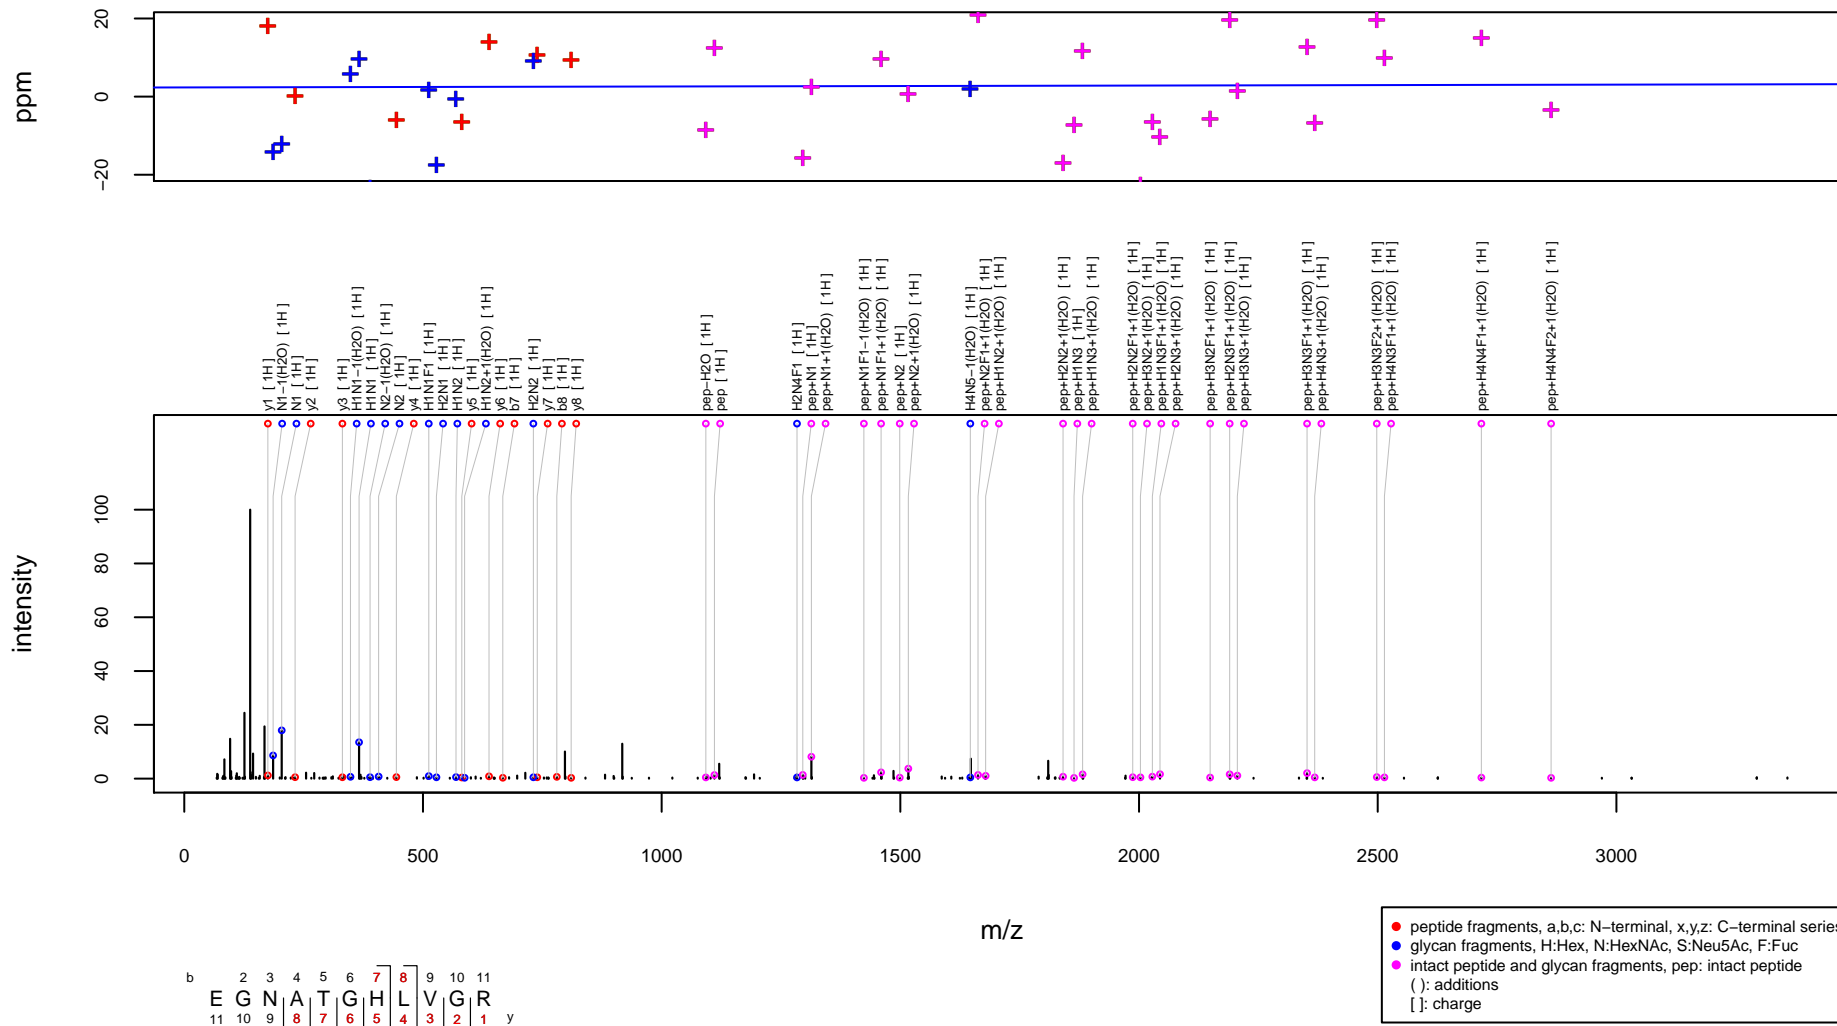

# m/z 1269.308 charge 4 scan 0-0

Score= 83.14 , Hits= 55 , Explained Intensity= 0.55

Peptide: APOD\_HUMAN[83,108]:ADGTVNQIEGEATPVNLTEPAKLEVK

Glycan: SHNH(SHNH)HN(F)N, S2H5N4F1

Charge: 4H

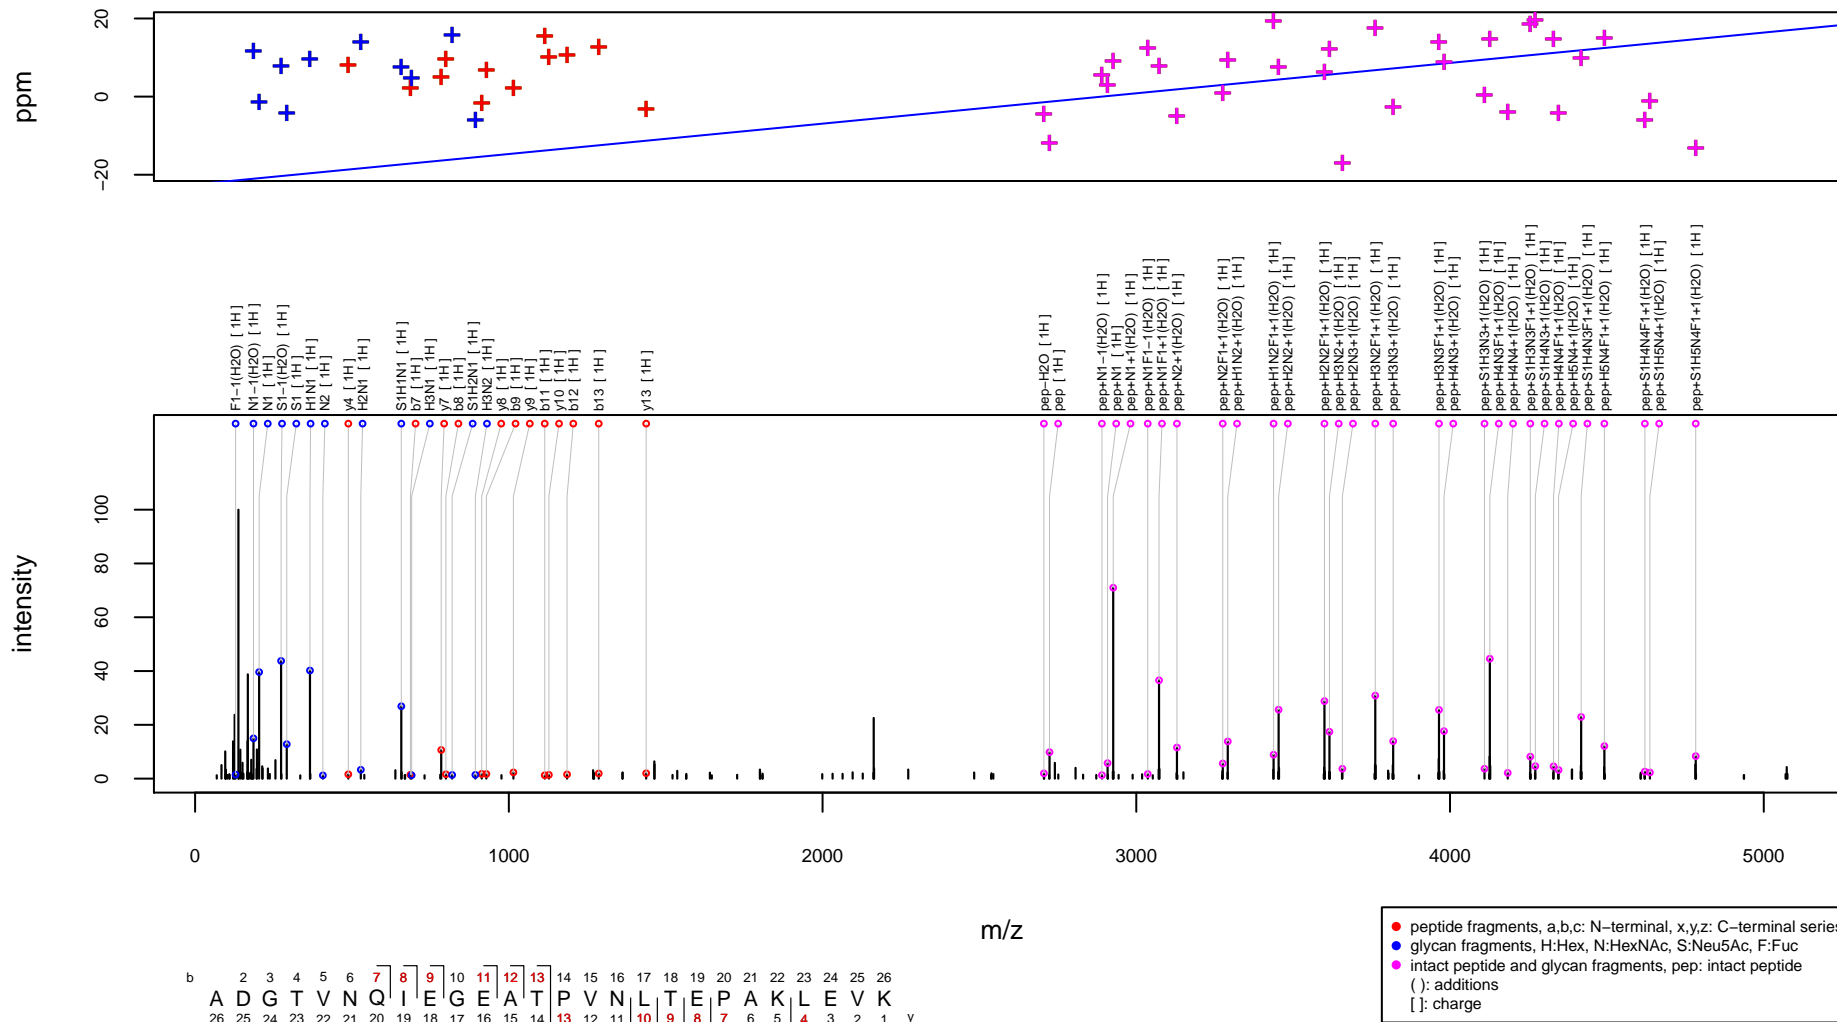

# m/z 926.3891 charge 3 scan 0-0

Score= 57.09 , Hits= 35 , Explained Intensity= 0.43

Peptide: IGJ\_HUMAN[70,80]:ENISDPTSPLR

Glycan: SHNH(H)HNN, S1H4N3

Charge: 3H

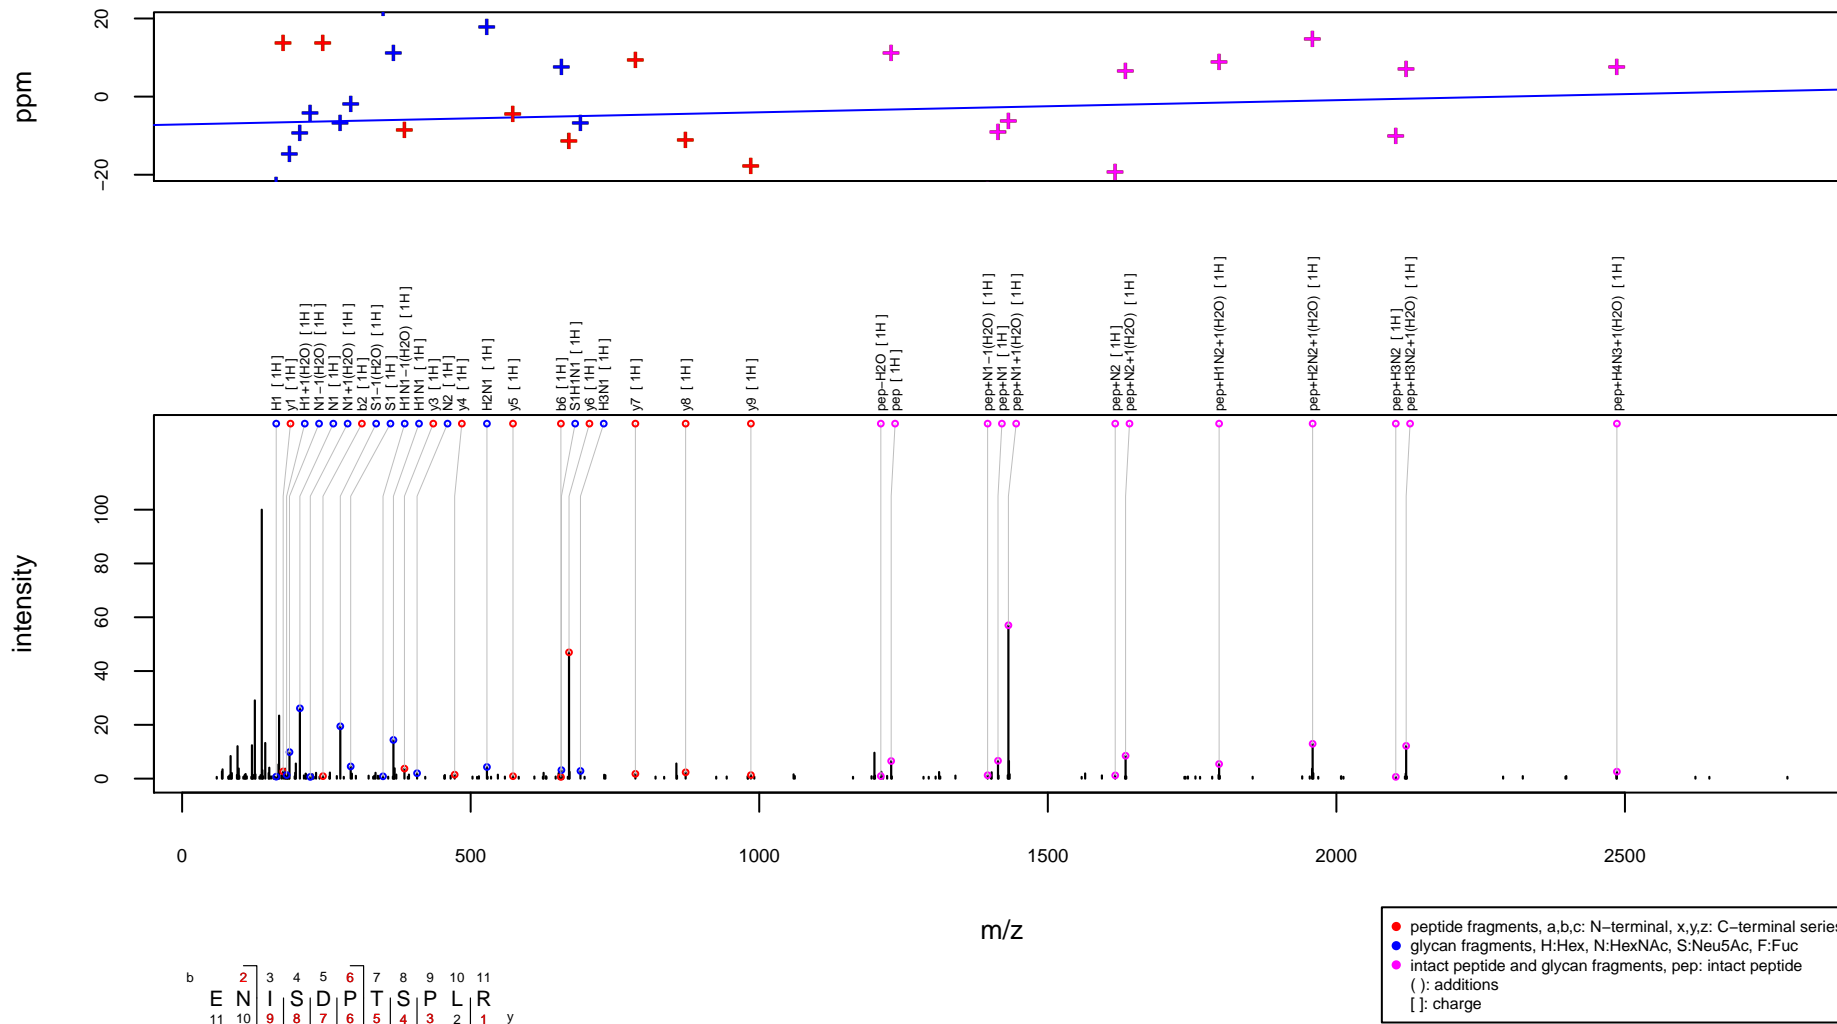

# m/z 1053.7725 charge 3 scan 0-0

Score= 54.58 , Hits= 39 , Explained Intensity= 0.34

Peptide: CUBN\_HUMAN[3457,3468]:NGSNSNSPLL GK

Glycan: HNH(F(H)NH)(N)HNN, H5N5F1

Charge: 3H

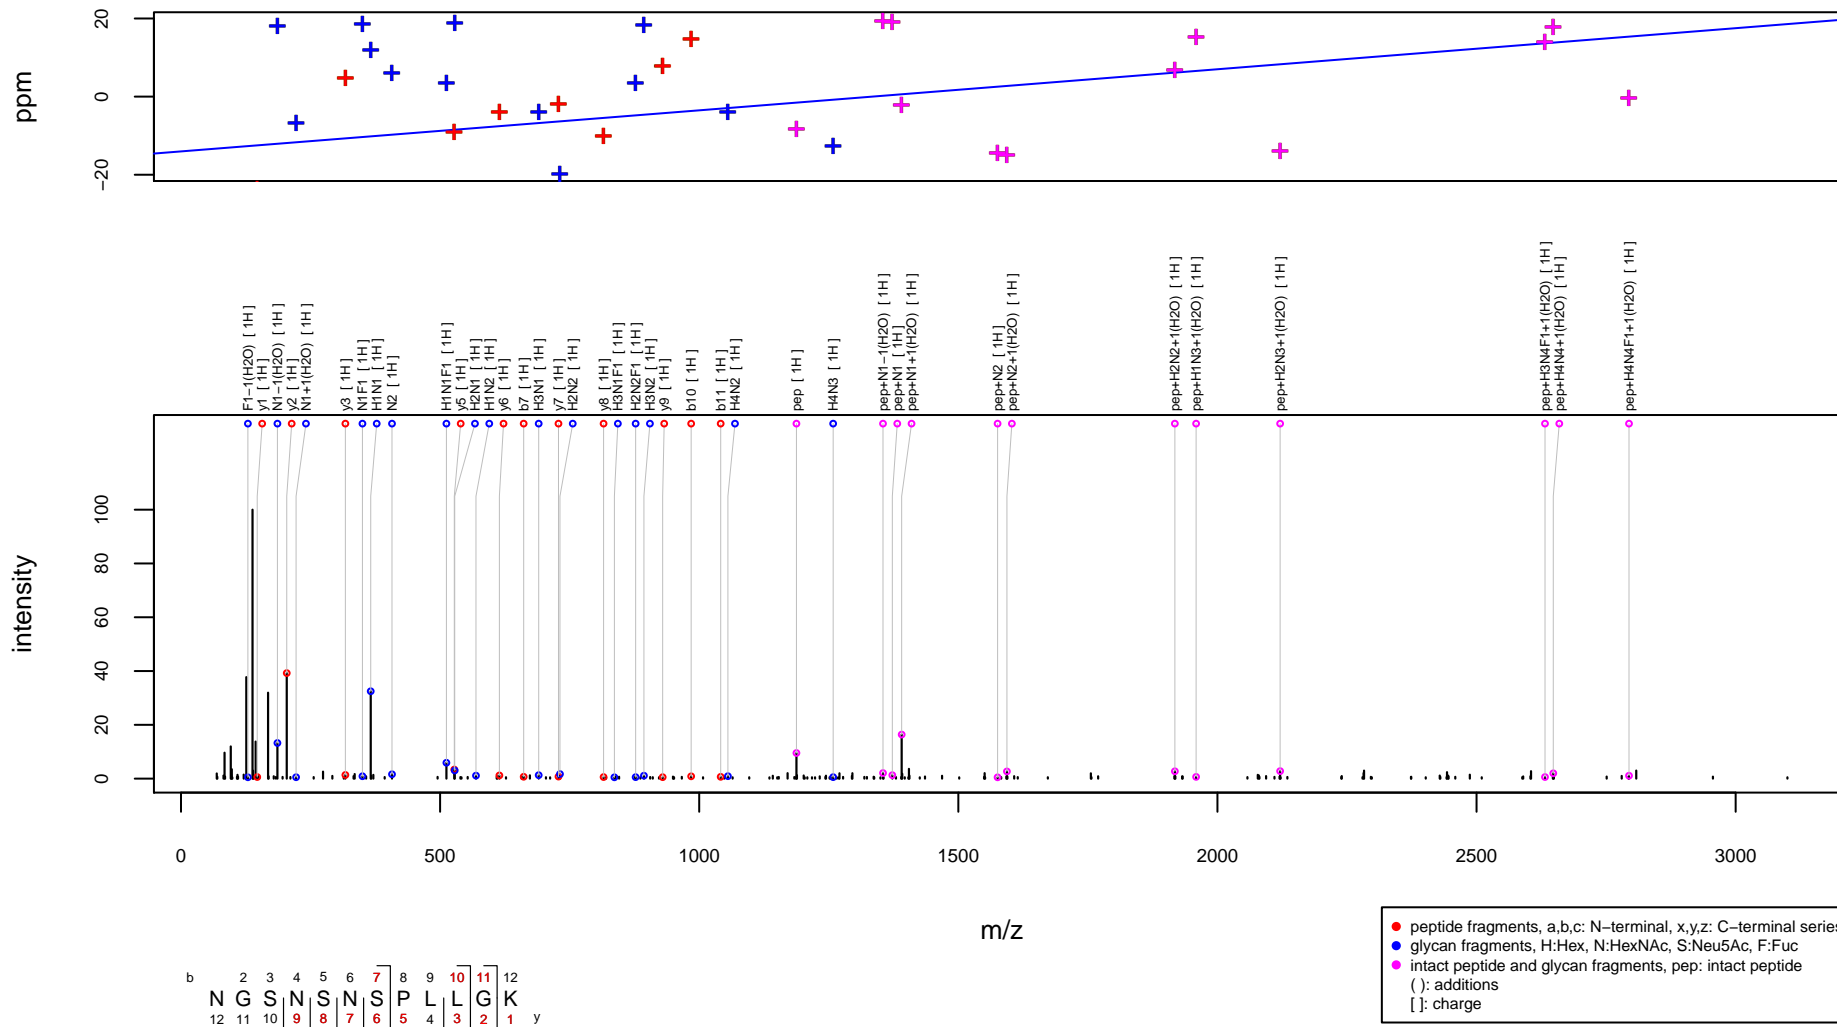

# m/z 1067.4501 charge 3 scan 0-0

Score= 54.44 , Hits= 39 , Explained Intensity= 0.36

Peptide: CUBN\_HUMAN[3457,3468]:NGSNSNSPLL GK

Glycan: NN(HN)H(NH)HN(F)N, H4N6F1

Charge: 3H

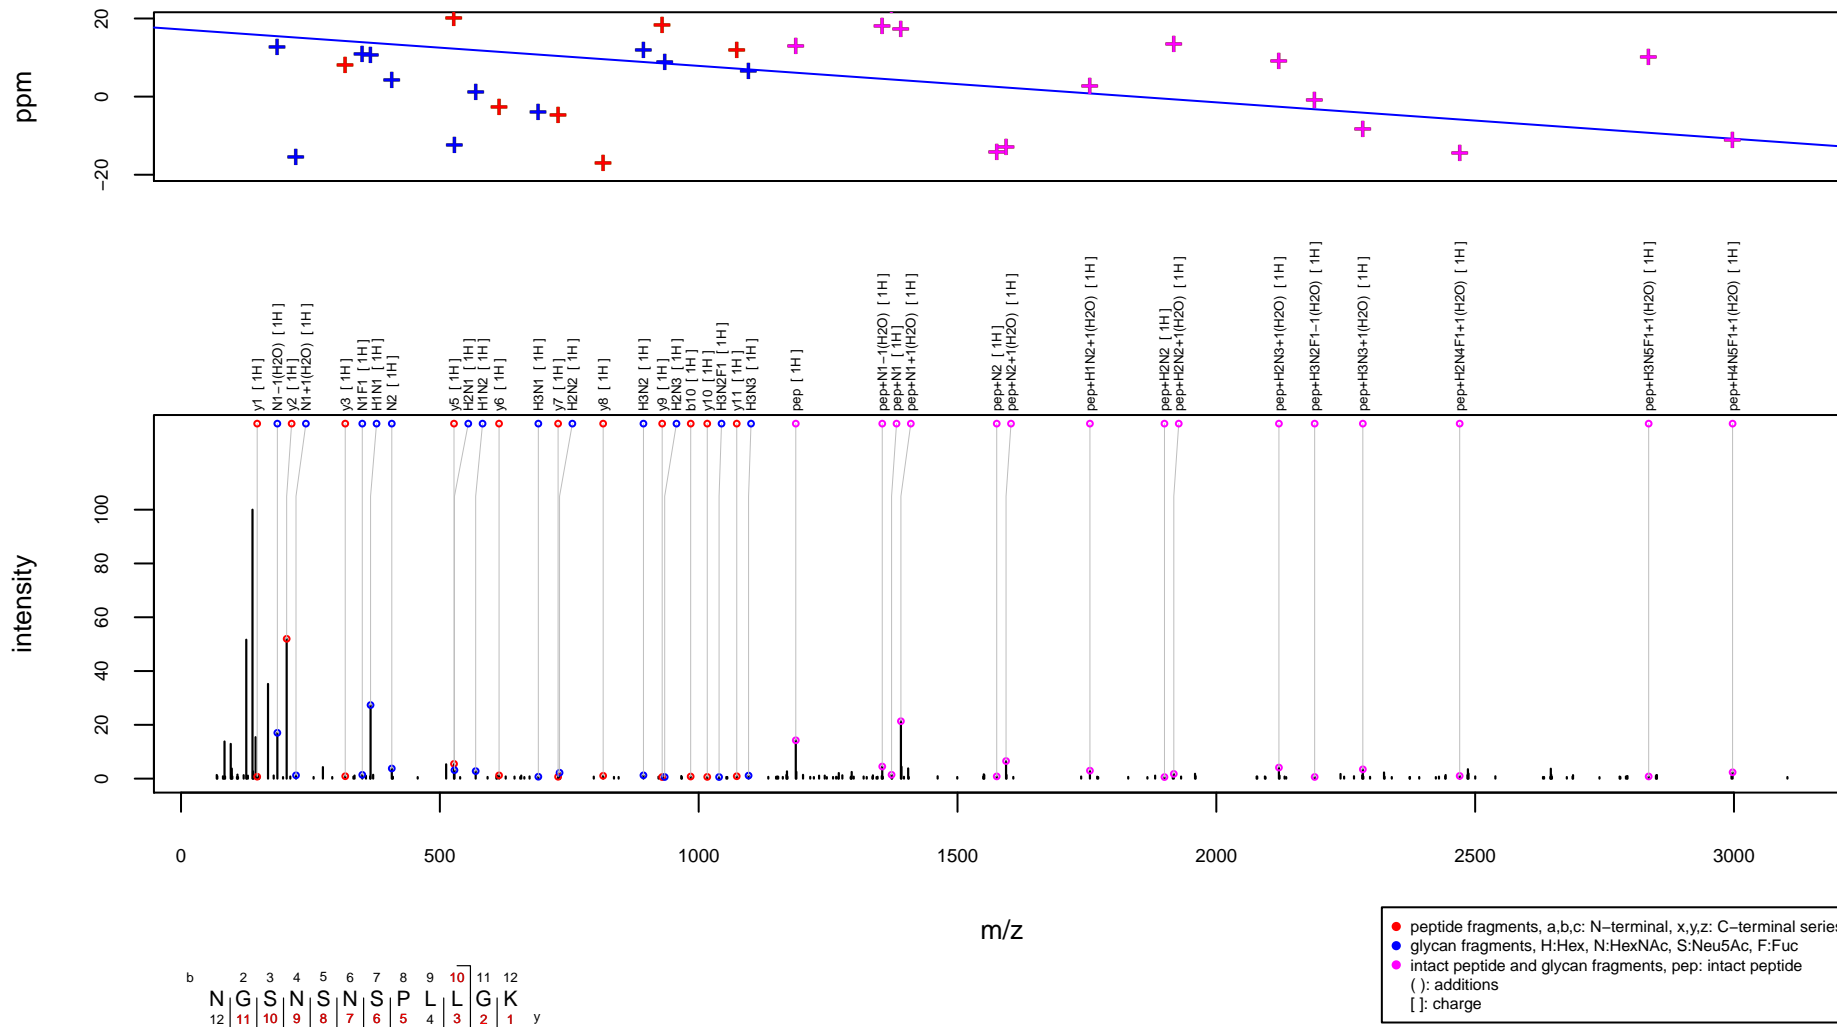

# m/z 1301.5304 charge 3 scan 0-0

Score= 69.16 , Hits= 48 , Explained Intensity= 0.5

Peptide: PIGR\_HUMAN[498,515]:WNN**T**GCQALPSQDEG**P**SK

Glycan: S1H5N4

Charge: 3H

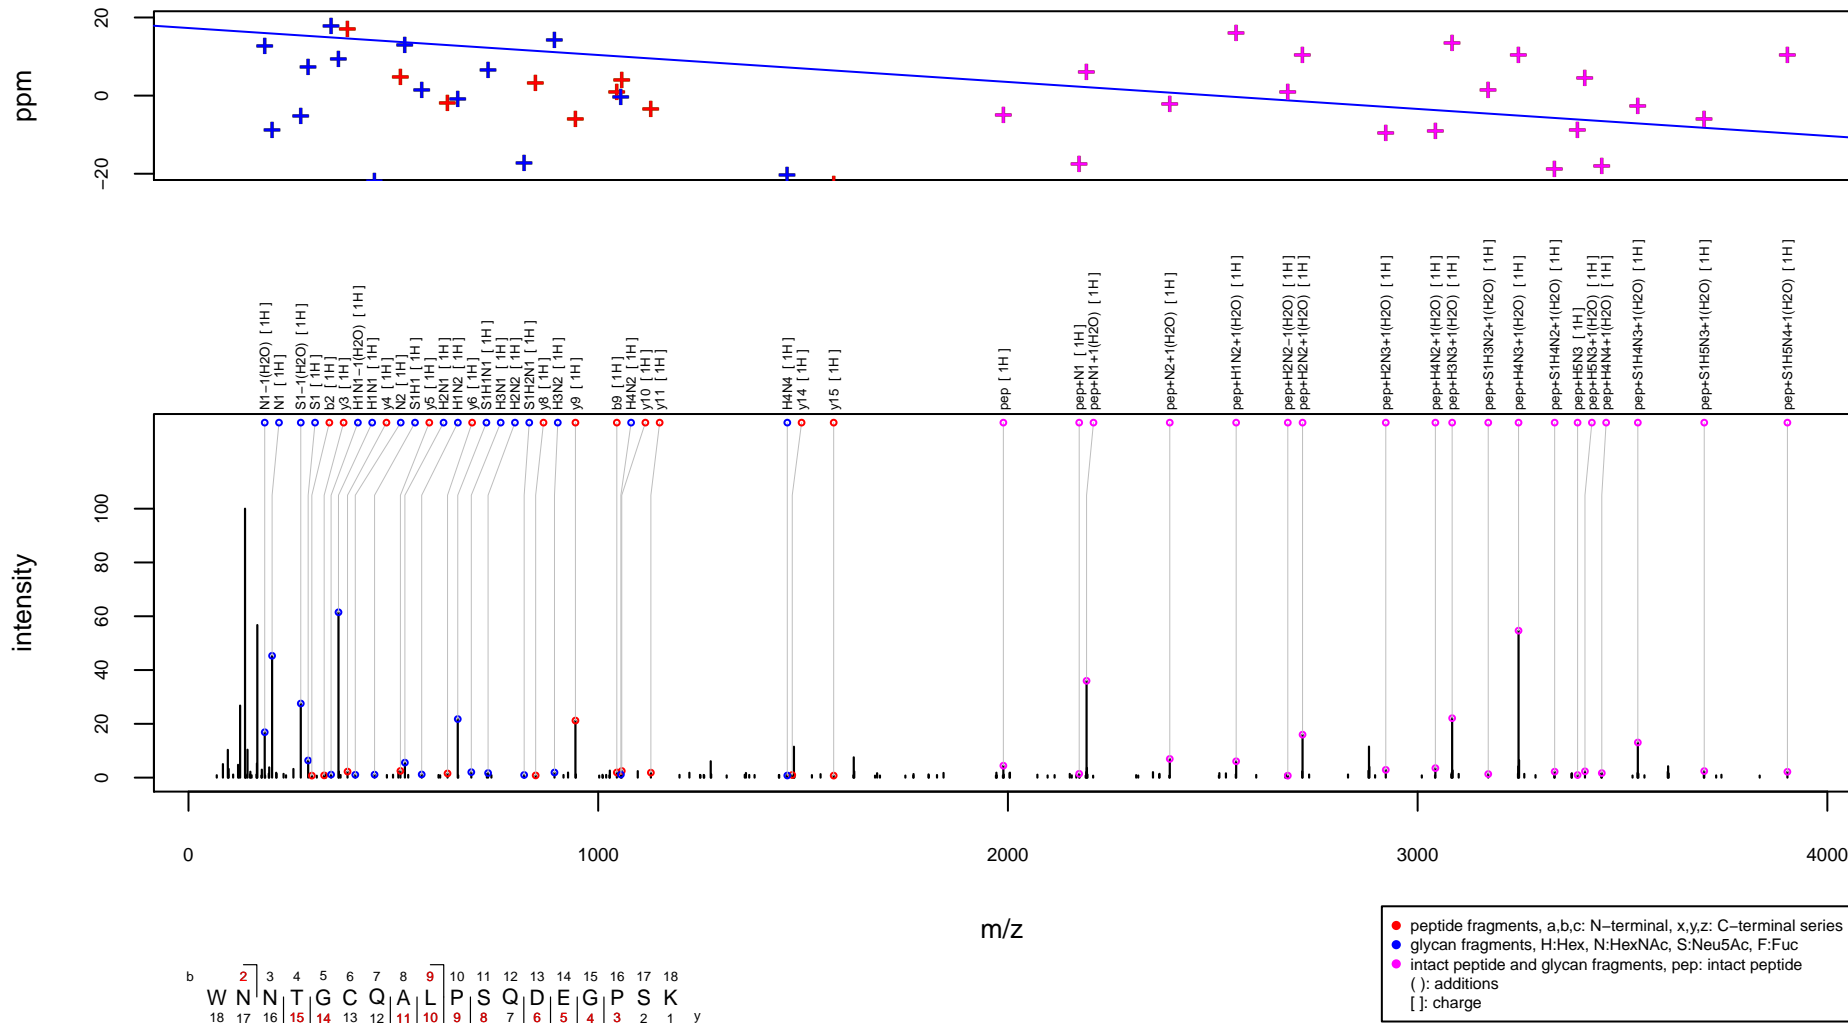



# m/z 1139.2382 charge 4 scan 0-0

Score= 56.5 , Hits= 64 , Explained Intensity= 0.48

Peptide: GGTL1\_HUMAN[160,173];LHNQLLPNVTTVER

Glycan: S1H6N6F3

Charge: 4H

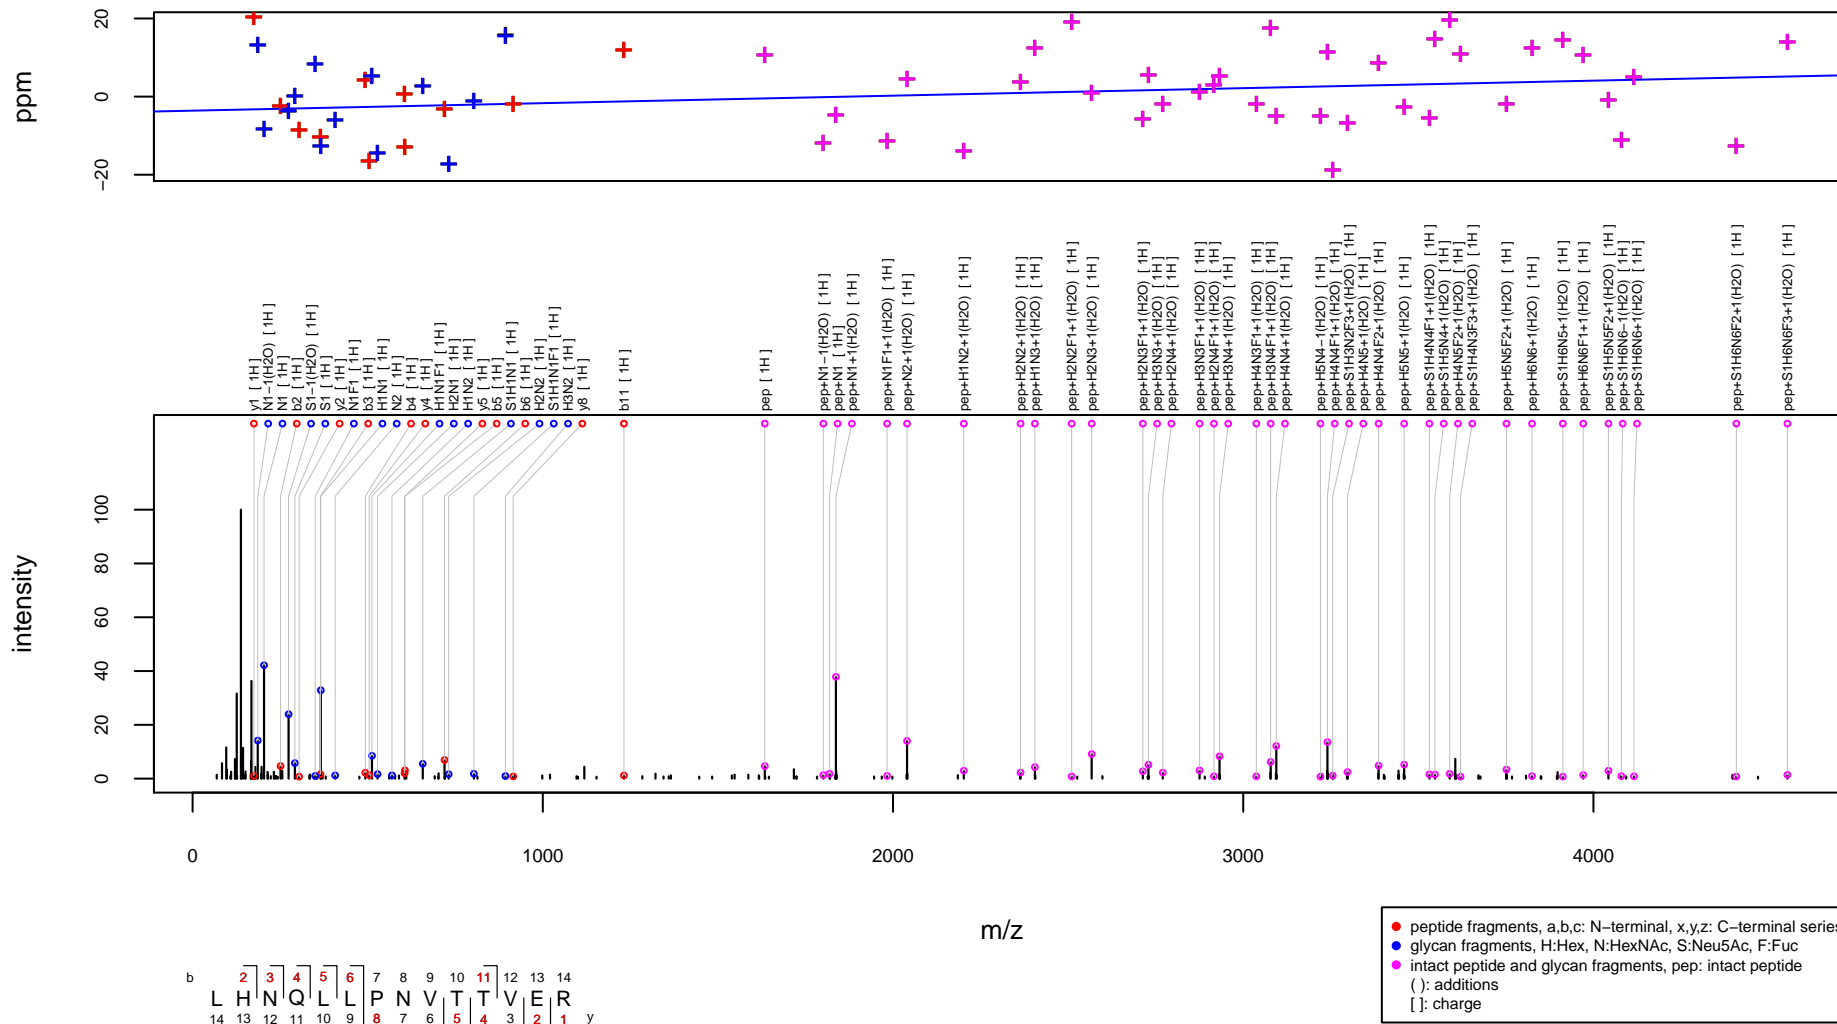

# m/z 1233.8455 charge 3 scan 0-0

Score= 71.32 , Hits= 63 , Explained Intensity= 0.51

Peptide: LG3BP\_HUMAN[542,554]:AAIPSAALDTNSK

Glycan: S1H6N5F1

Charge: 3H

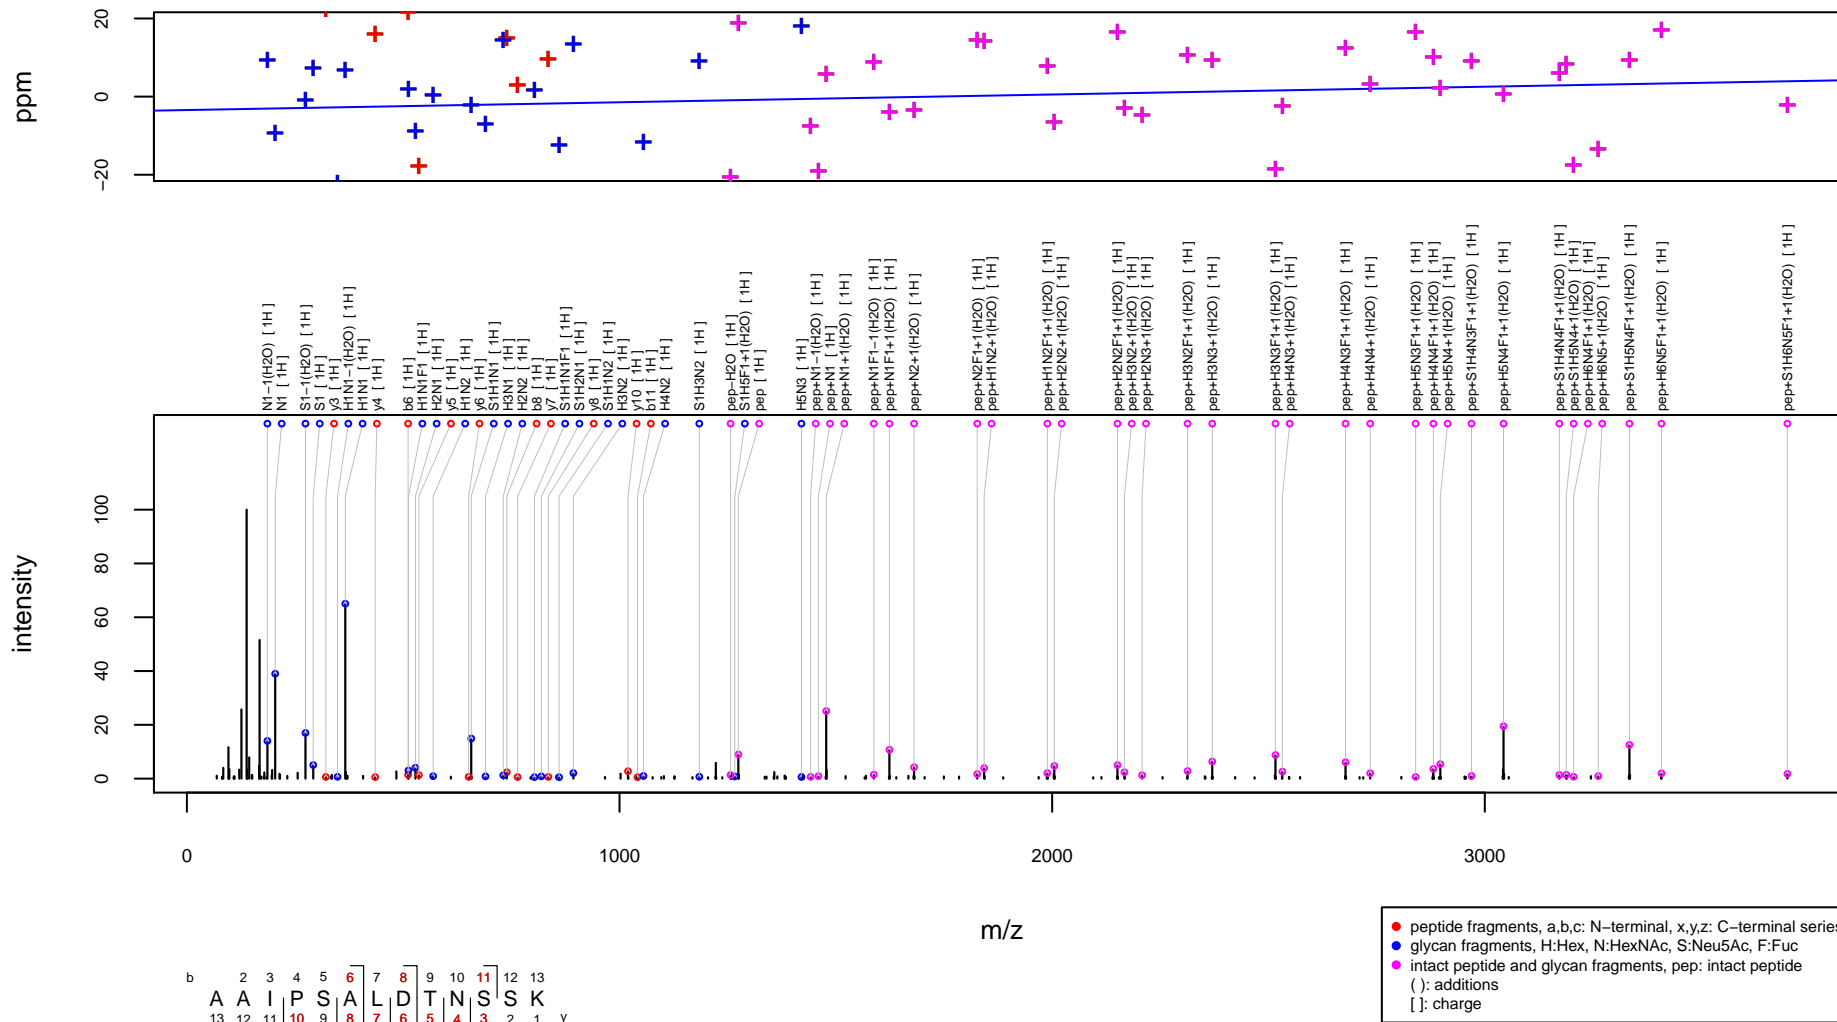

# m/z 1244.8206 charge 3 scan 0-0

Score= 52.94 , Hits= 35 , Explained Intensity= 0.44

Peptide: APOD\_HUMAN[61,73]:CIQANYSLMENGK

Glycan: SHNH(SHNH)HNN, S2H5N4

Charge: 3H

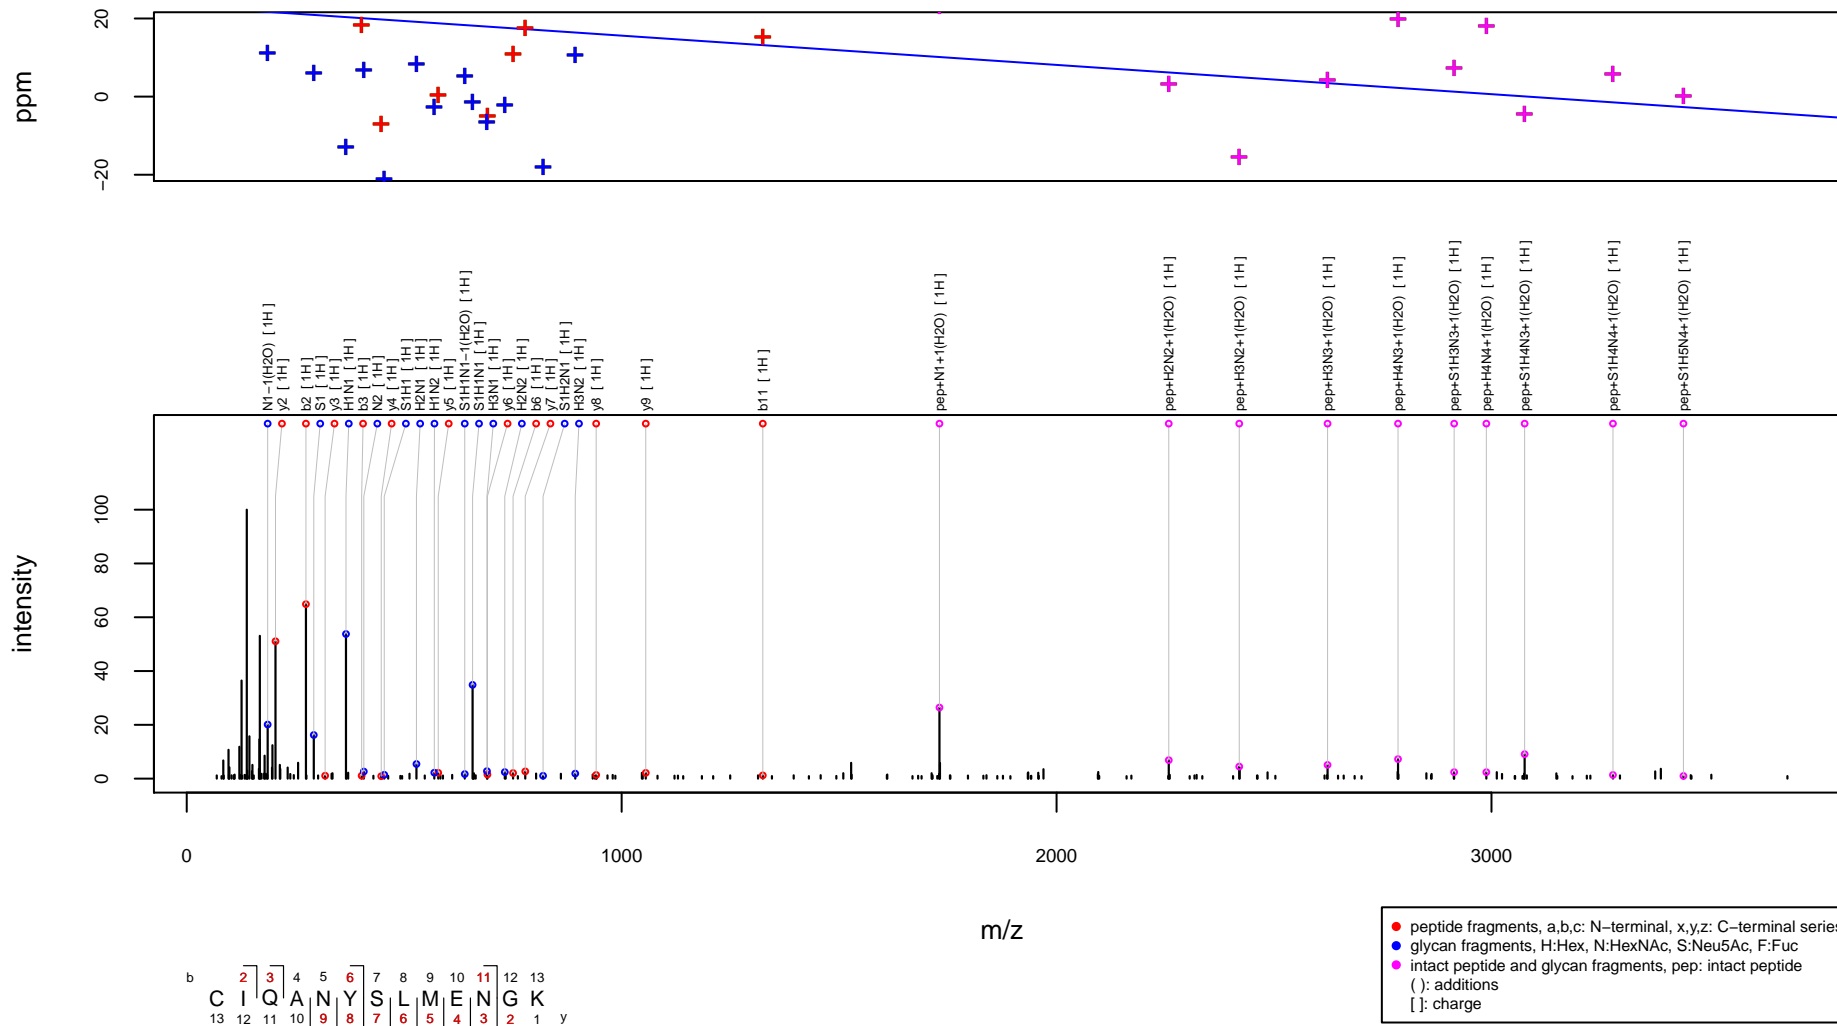

# m/z 1019.6771 charge 4 scan 0-0

Score= 51.93 , Hits= 39 , Explained Intensity= 0.39

Peptide: CLUS\_HUMAN[372,385]:LANLTQGEDQYYLR

Glycan: SNNH(SHNH)HN(F)N, S2H4N5F1

Charge: 4H

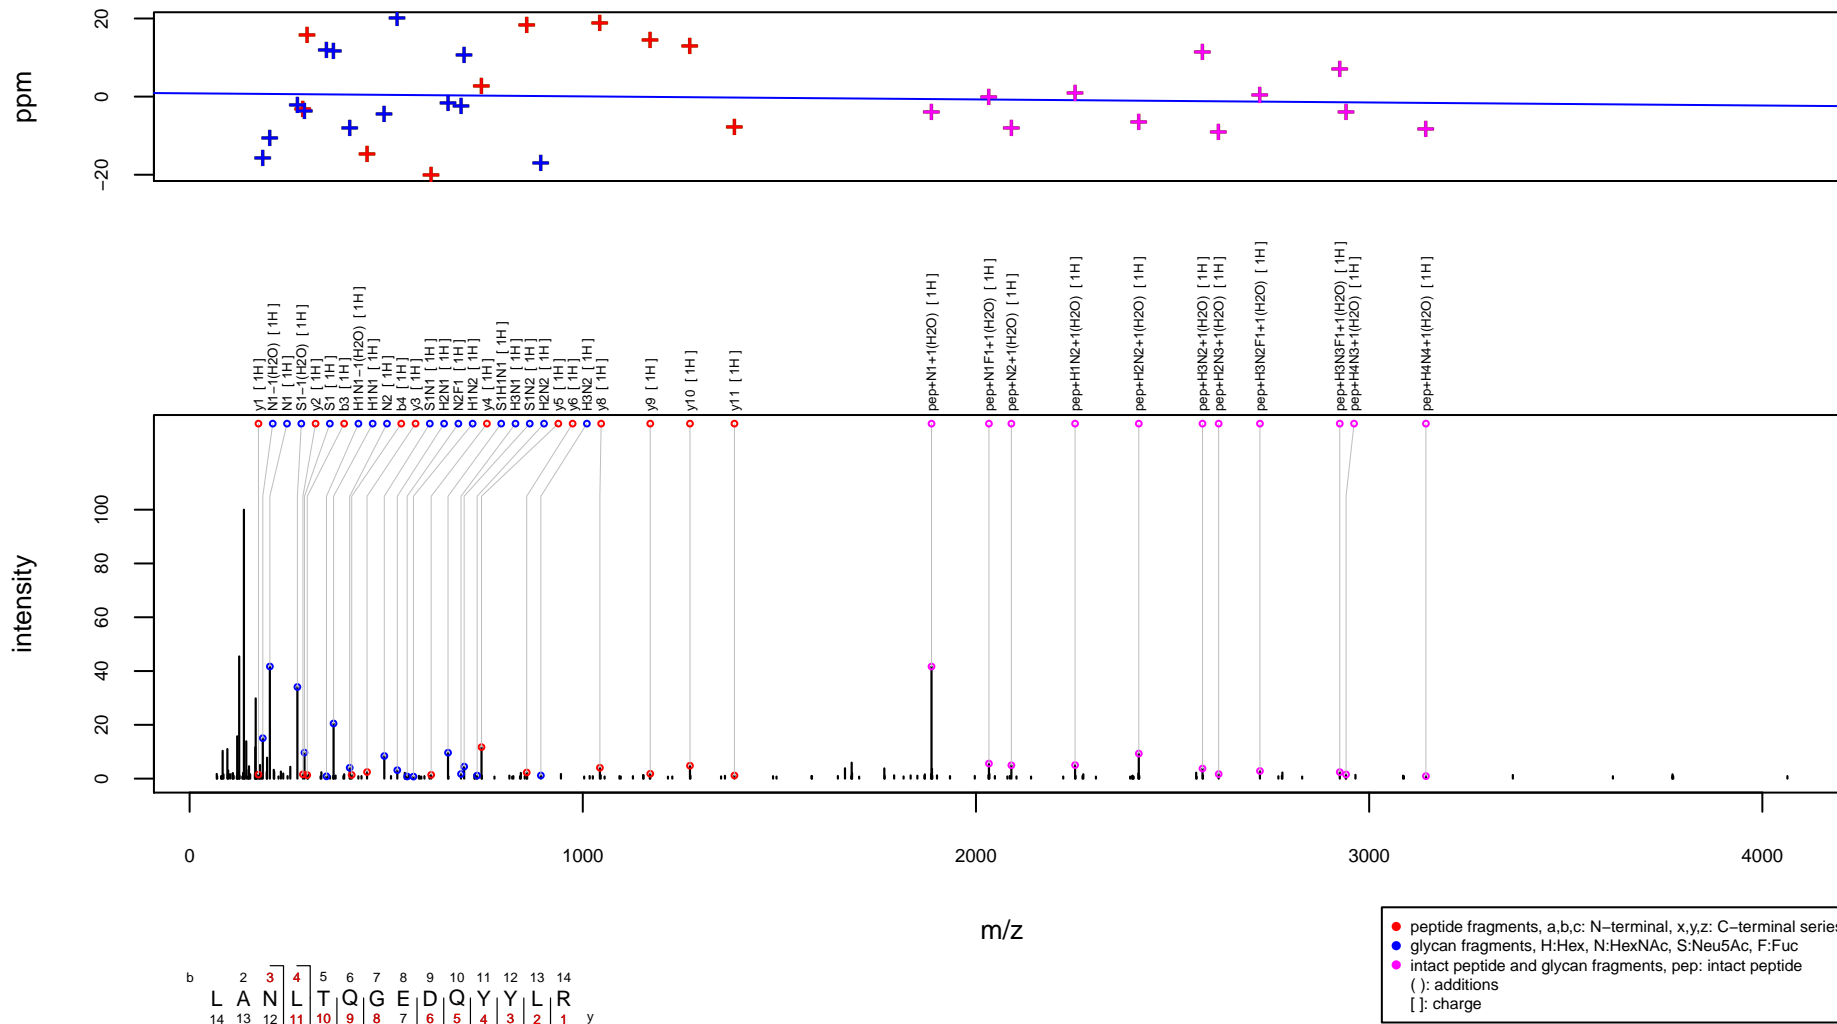

# m/z 990.419 charge 3 scan 0-0

Score= 59.35 , Hits= 40 , Explained Intensity= 0.36

Peptide: LG3BP\_HUMAN[542,554]:AAIPSA LDTNSSK

Glycan: SHNH(H)HN(F)N, S1H4N3F1

Charge: 3H

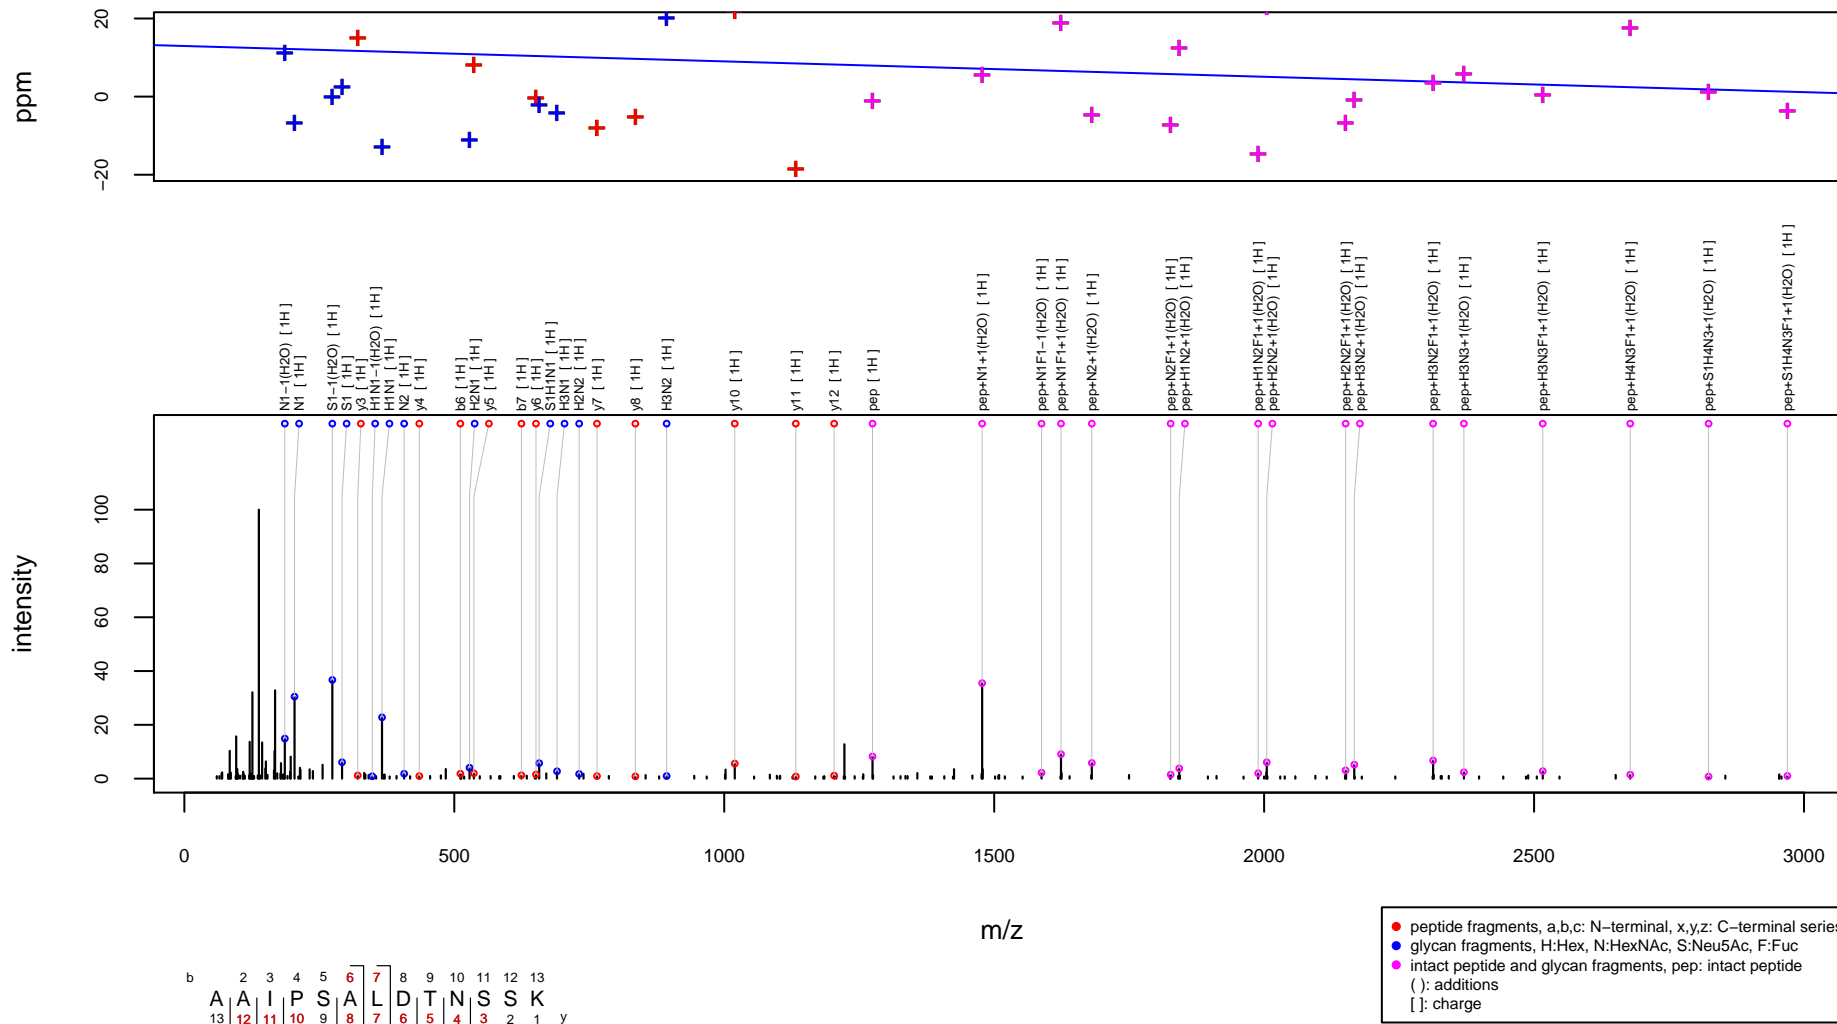

# m/z 972.4312 charge 3 scan 0-0

Score= 34.35 , Hits= 26 , Explained Intensity= 0.12

Peptide: Z518A\_HUMAN[404,416]:AEEGPNASSGFMK

Glycan: H3N4F2

Charge: 3H

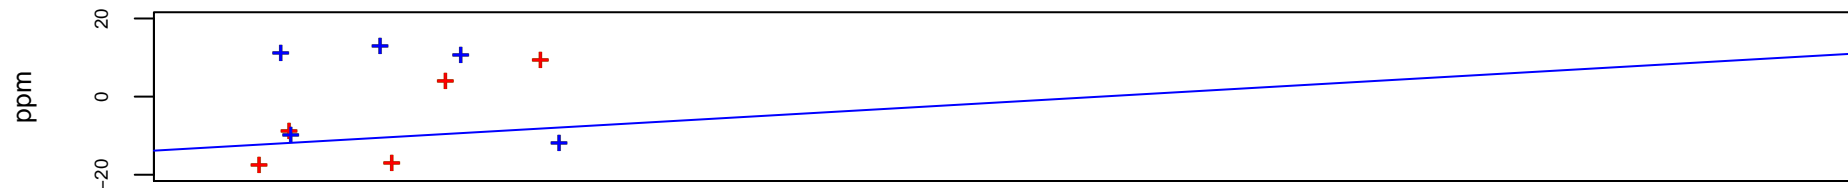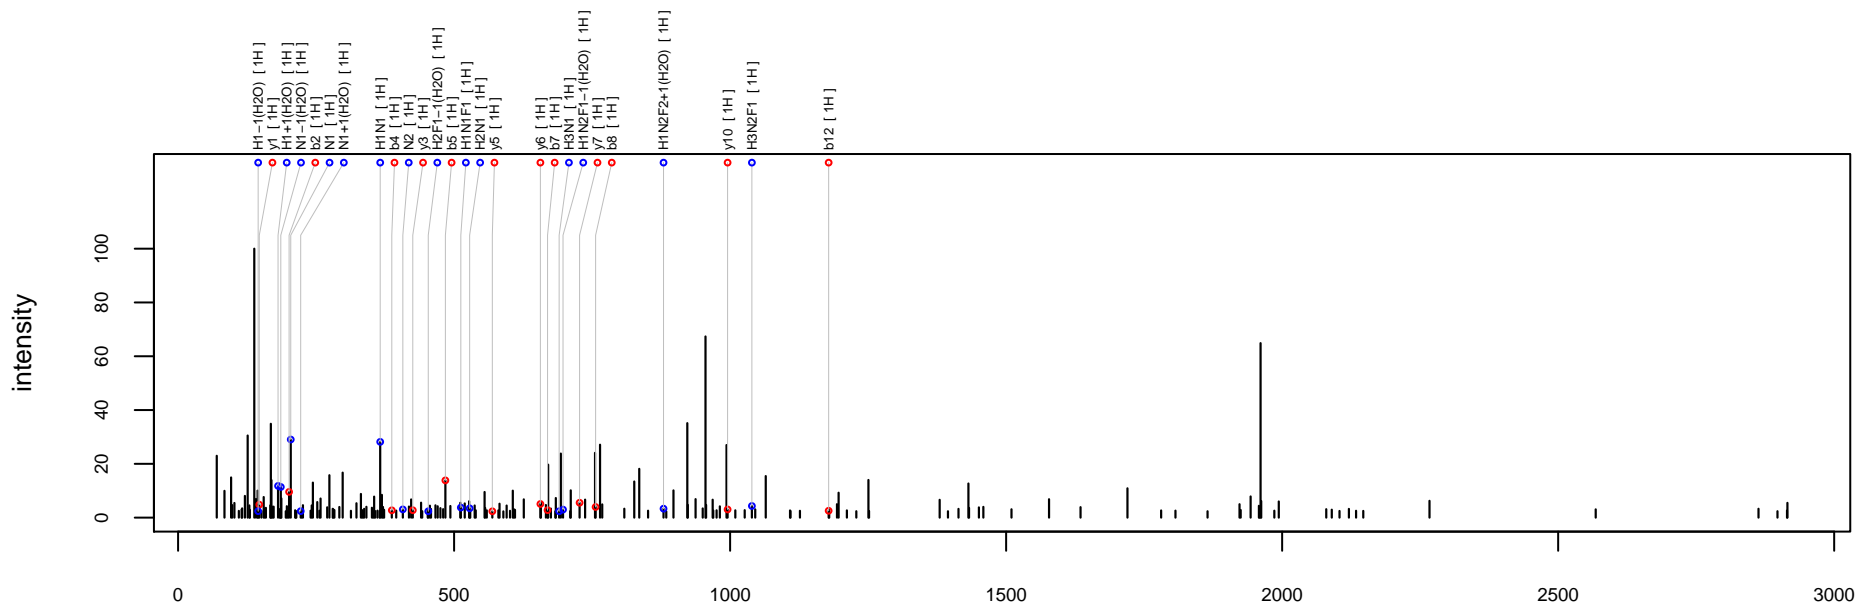

b 

|    |    |    |    |   |   |   |   |   |    |    |    |    |
|----|----|----|----|---|---|---|---|---|----|----|----|----|
|    | 2  | 3  | 4  | 5 | 6 | 7 | 8 | 9 | 10 | 11 | 12 | 13 |
| A  | E  | E  | G  | P | N | A | S | S | G  | F  | M  | K  |
| 13 | 12 | 11 | 10 | 9 | 8 | 7 | 6 | 5 | 4  | 3  | 2  | 1  |

 y

● peptide fragments, a,b,c: N-terminal, x,y,z: C-terminal series  
 ● glycan fragments, H:Hex, N:HexNAc, S:Neu5Ac, F:Fuc  
 ● intact peptide and glycan fragments, pep: intact peptide  
 ( ): additions  
 [ ]: charge

# m/z 994.9092 charge 4 scan 0-0

Score= 49.16 , Hits= 33 , Explained Intensity= 0.32

Peptide: FETUA\_HUMAN[145,159]:VCQDCPLLAPLNDTR

Glycan: SHNH(SHNH)HNN, S2H5N4

Charge: 4H

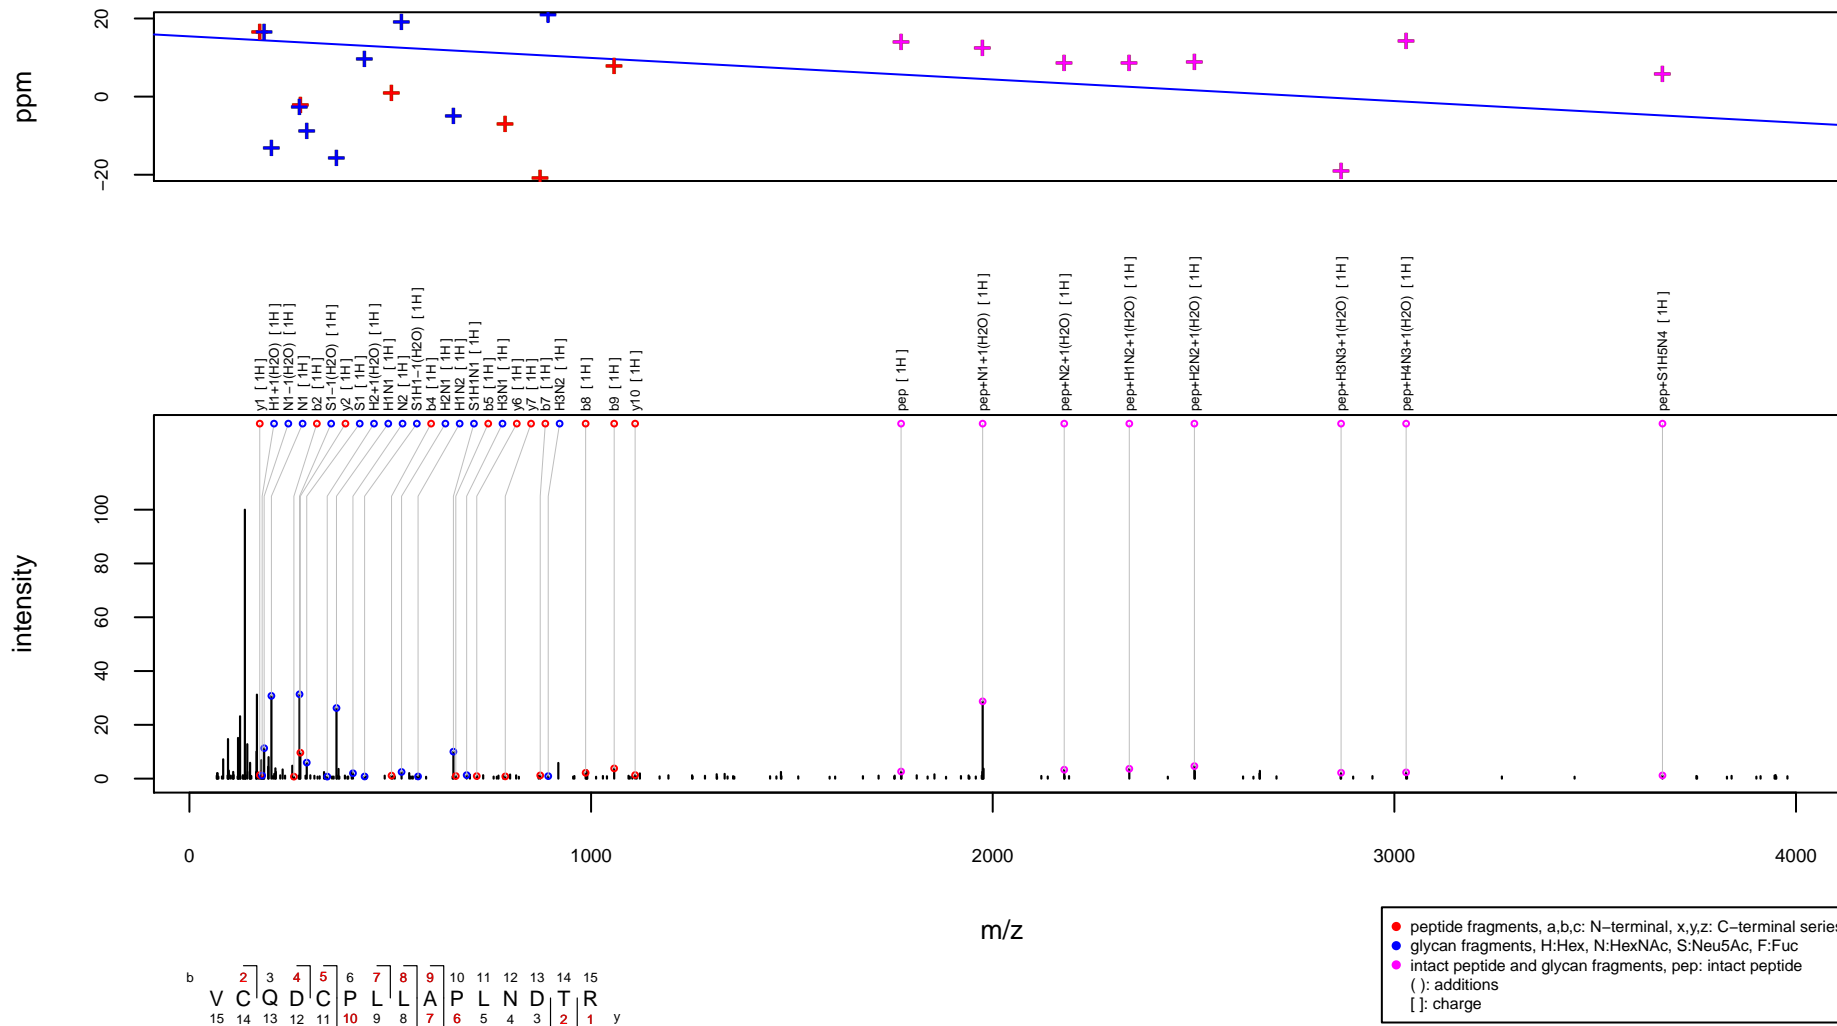

# m/z 1098.136 charge 3 scan 0-0

Score= 56.91 , Hits= 41 , Explained Intensity= 0.36

Peptide: LAMP2\_HUMAN[352,361]:VQPFNVTQ GK

Glycan: NNH(HN(HN)H)HN(F)N, H5N6F1

Charge: 3H

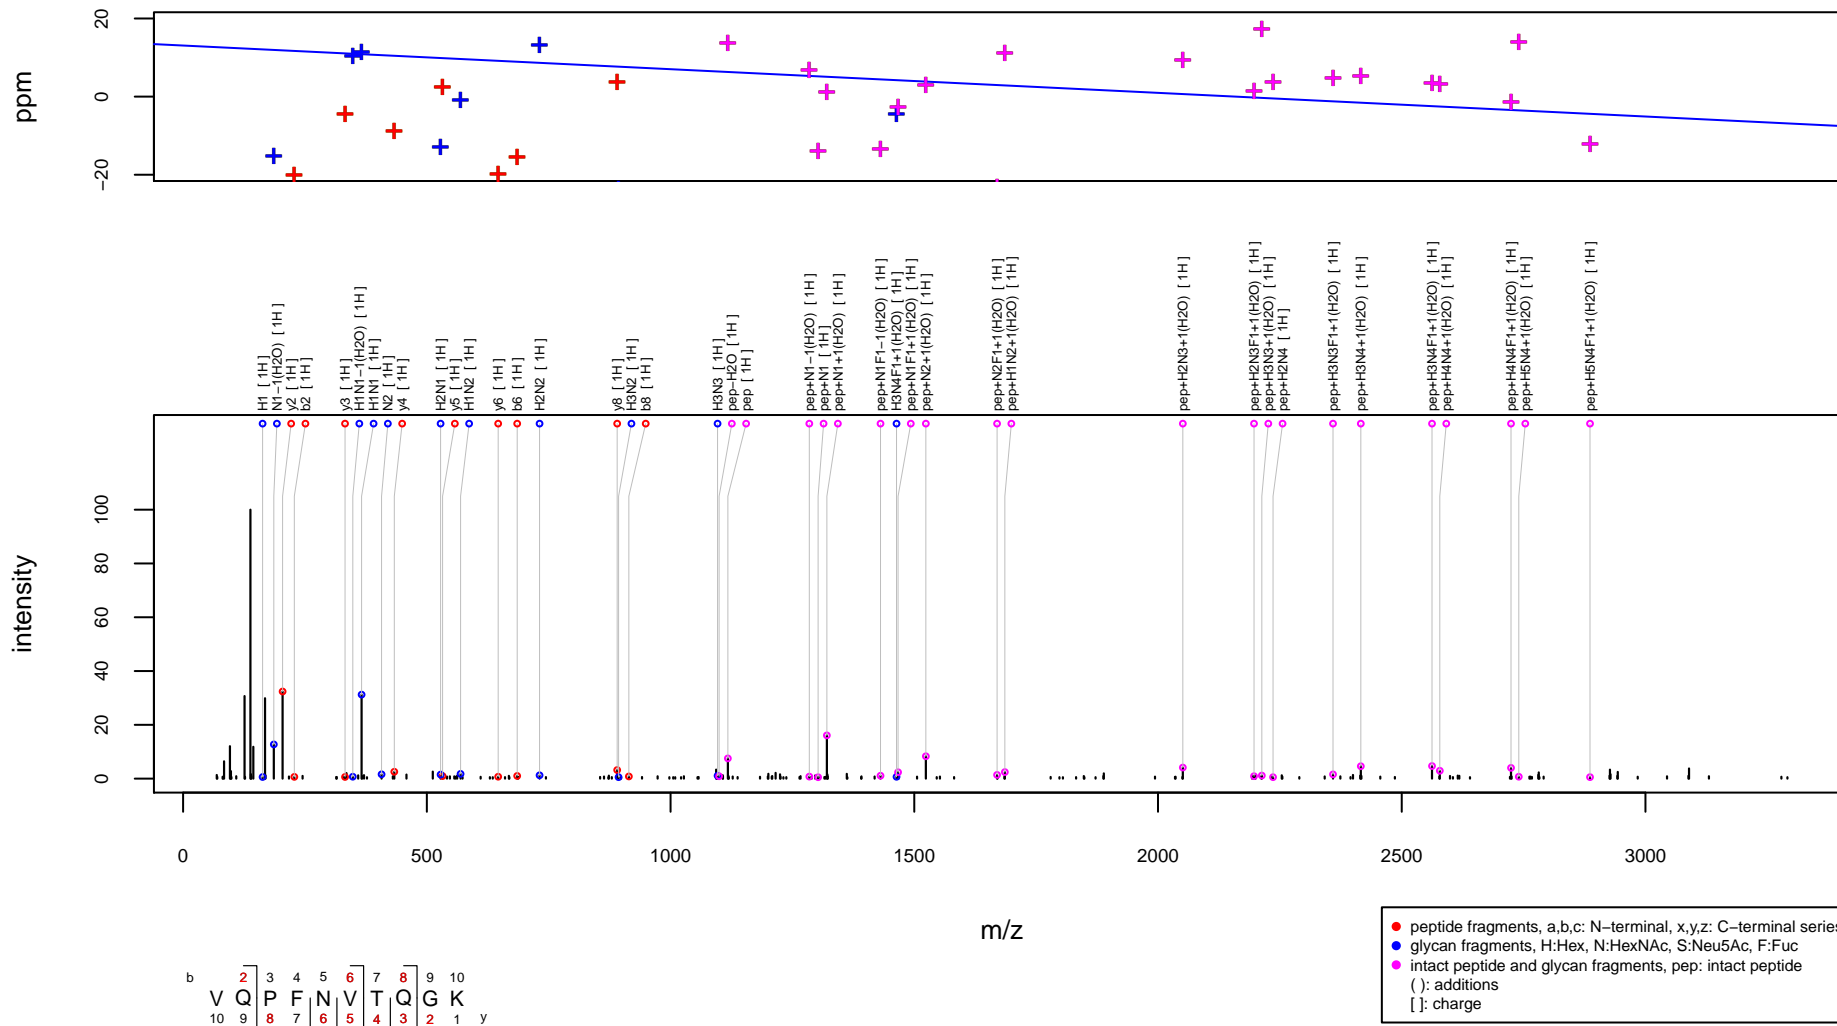



# m/z 1001.0784 charge 3 scan 0-0

Score= 62.1 , Hits= 39 , Explained Intensity= 0.47

Peptide: THRB\_HUMAN[118,124]:GHVNITR

Glycan: SHNH(SHNH)HNN, S2H5N4

Charge: 3H

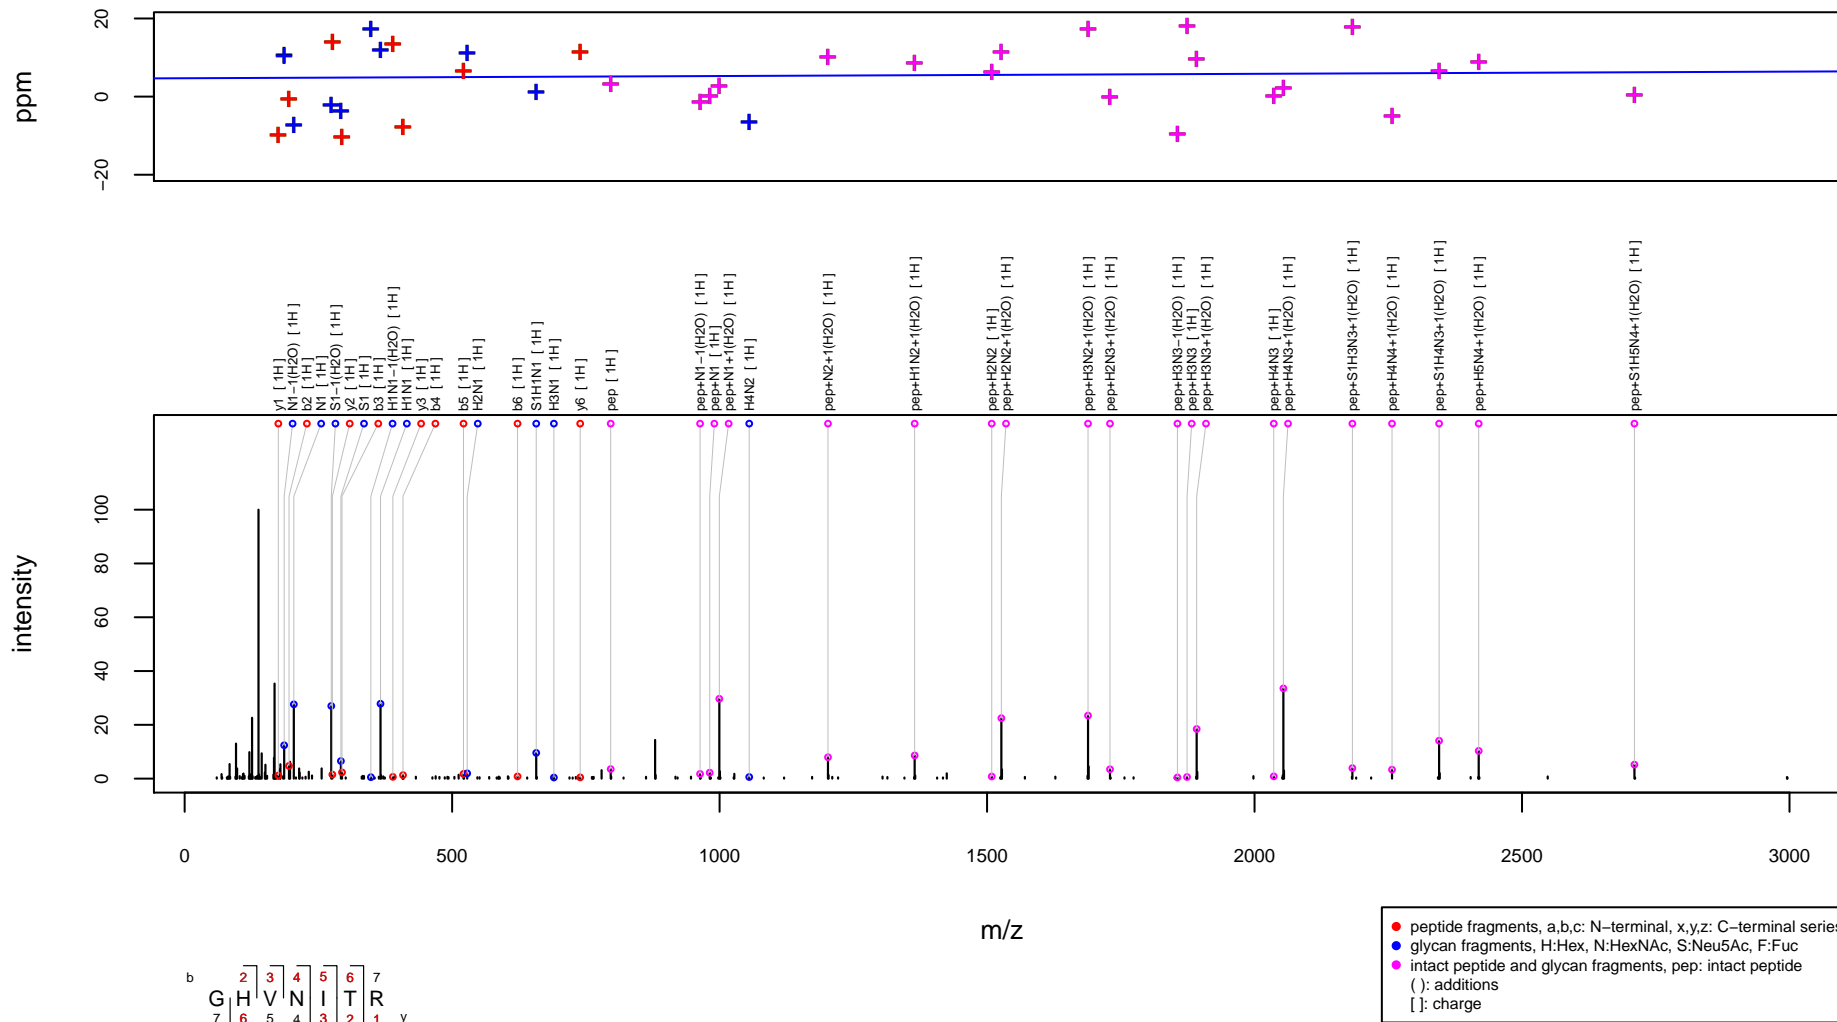

# m/z 950.6725 charge 4 scan 0-0

Score= 50.96 , Hits= 46 , Explained Intensity= 0.39

Peptide: AMPN\_HUMAN[126,136]:KLN<sup>Y</sup>TL<sup>S</sup>Q<sup>G</sup>H<sup>R</sup>

Glycan: H6N6F2

Charge: 4H

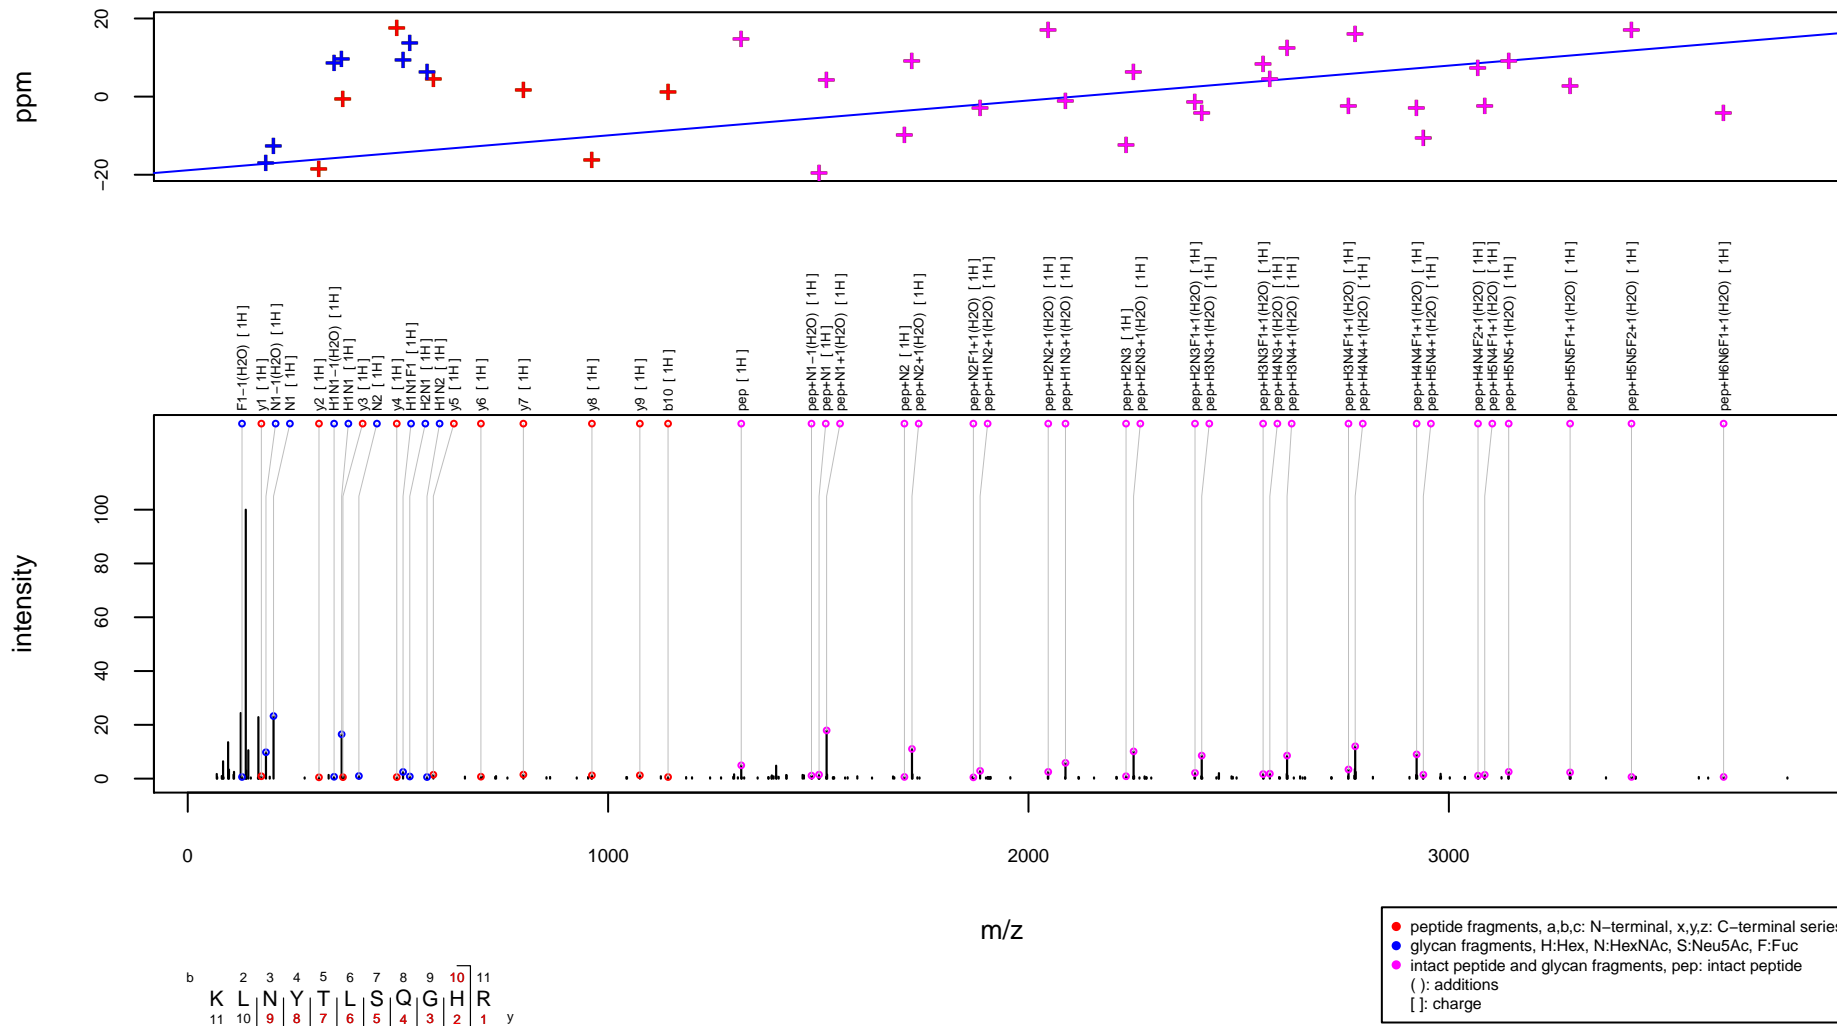

# m/z 1145.9838 charge 4 scan 0-0

Score= 42.62 , Hits= 42 , Explained Intensity= 0.32

Peptide: MGA\_HUMAN[817,834]:GGYIFPTQQPNTTTLASR

Glycan: H6N6F3

Charge: 4H

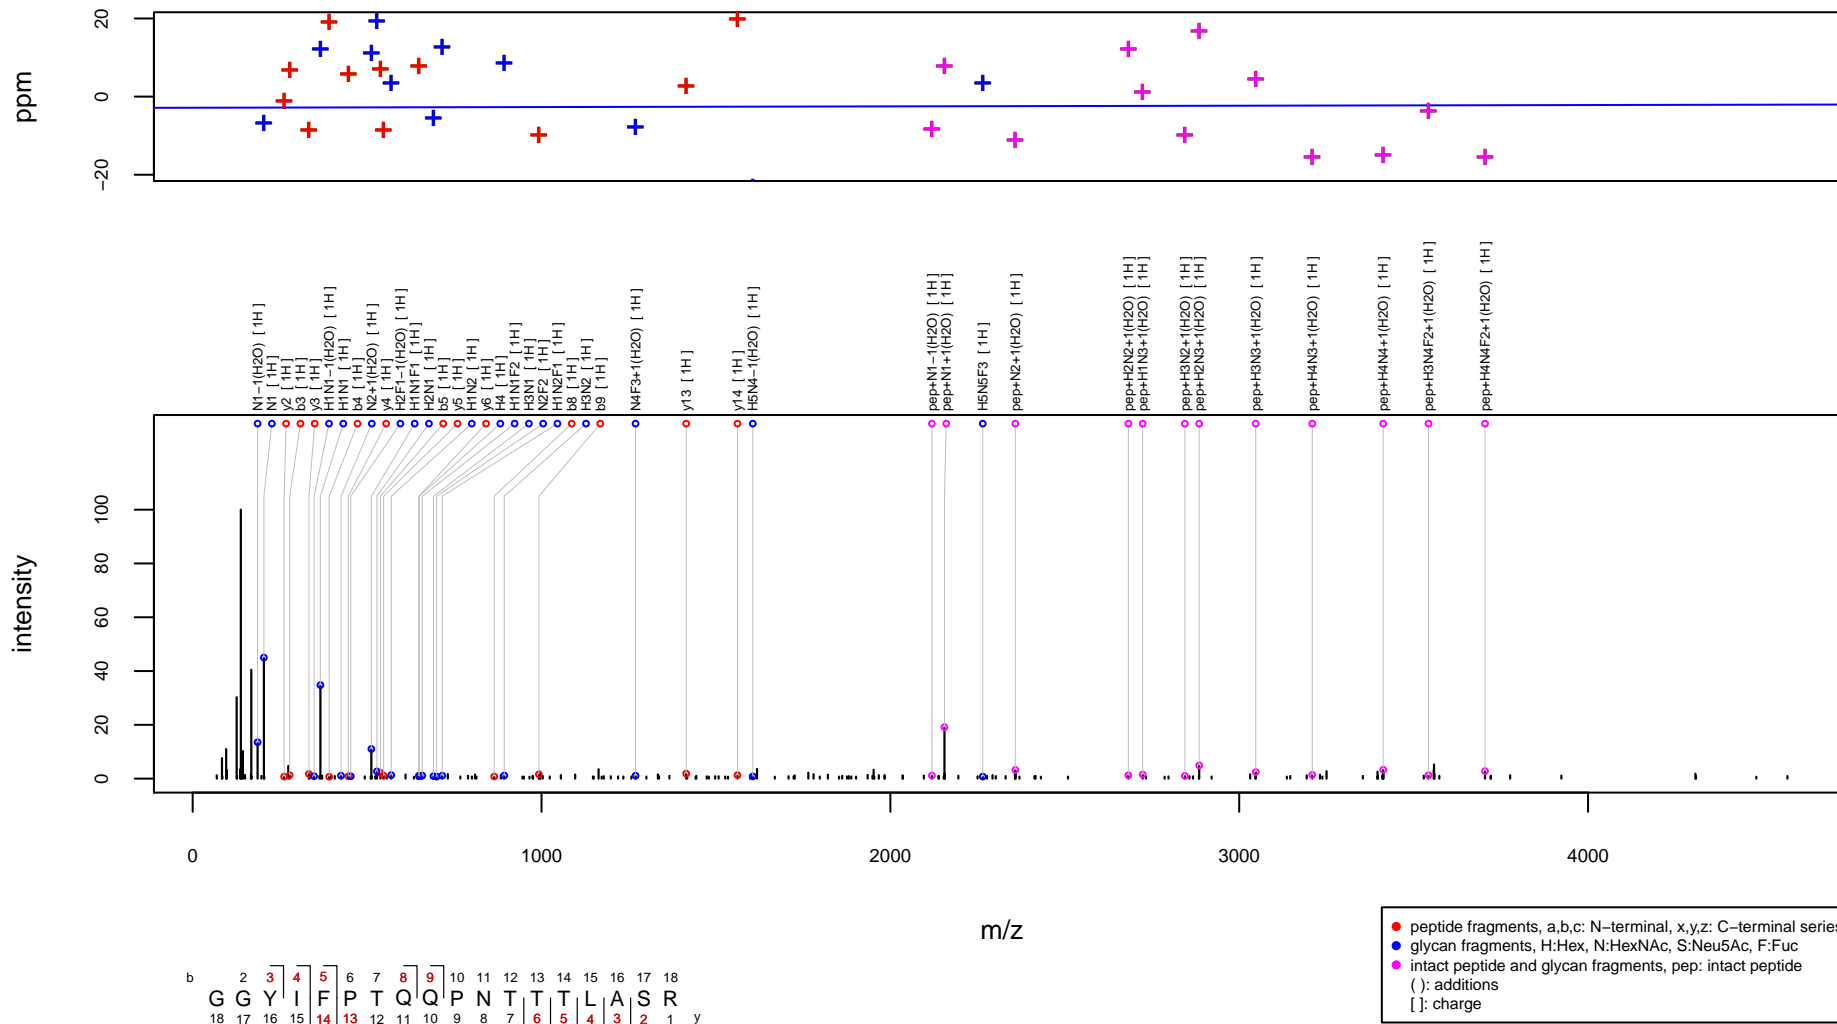

# m/z 859.1006 charge 4 scan 0-0

Score= 48.32 , Hits= 33 , Explained Intensity= 0.37

Peptide: IGJ\_HUMAN[70,80]:ENISDPTSPLR

Glycan: SHNH(SHNH)HNN, S2H5N4

Charge: 4H

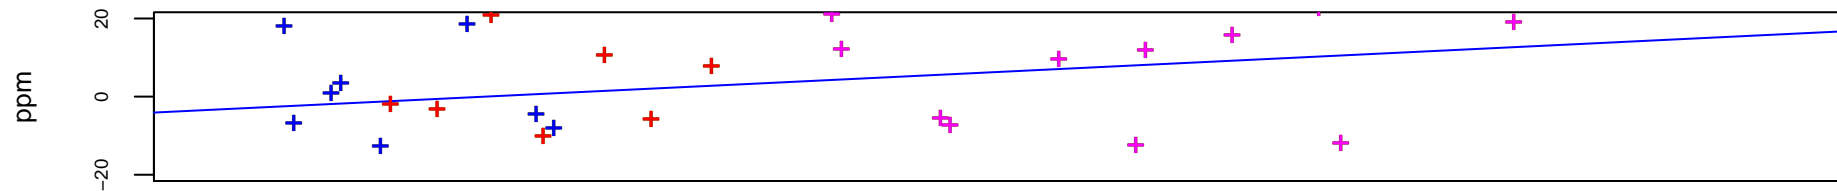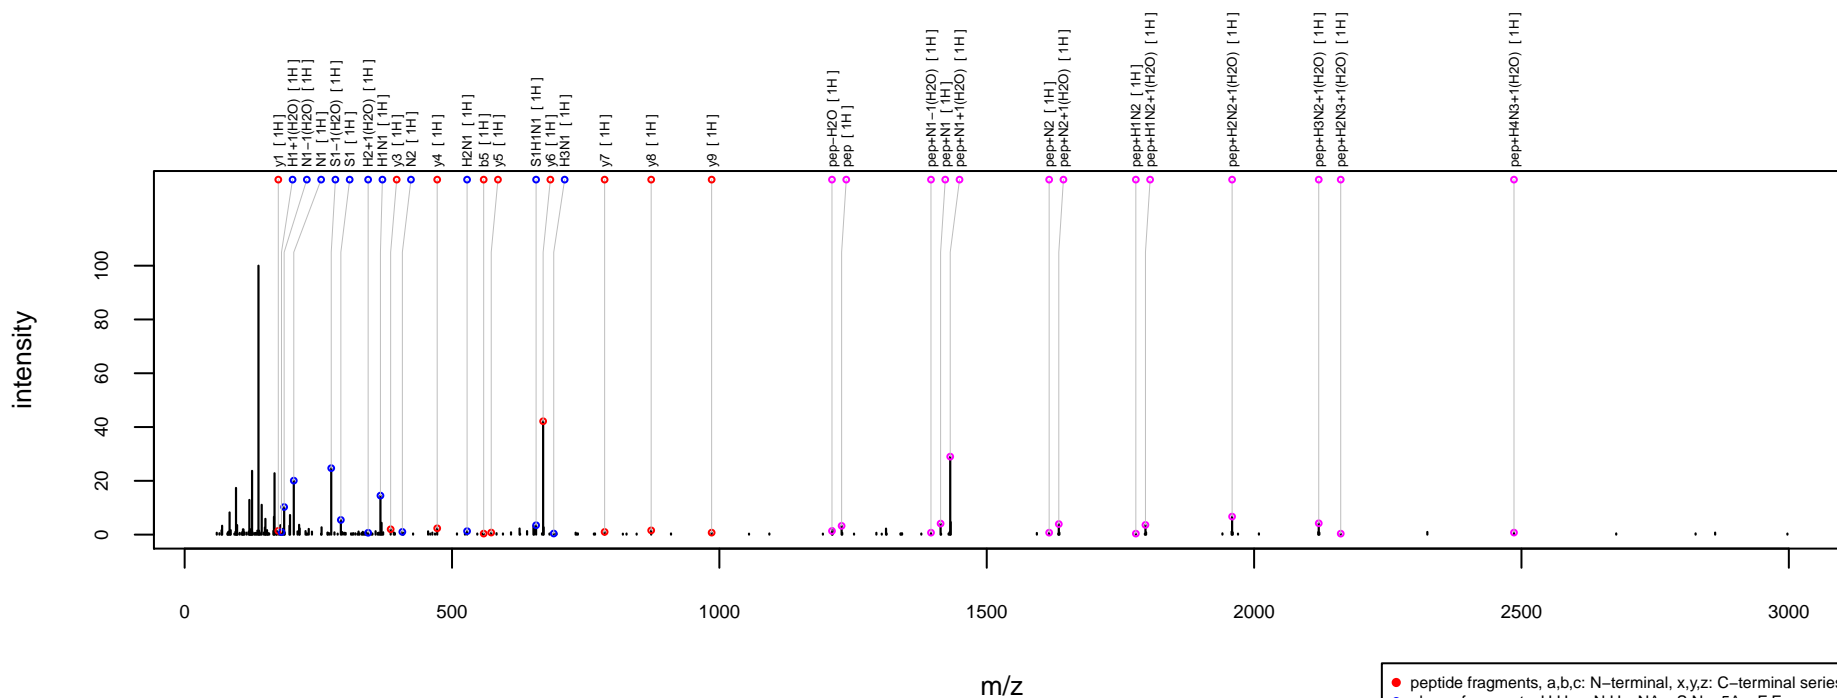

b

|    |    |   |   |   |   |   |   |   |    |    |
|----|----|---|---|---|---|---|---|---|----|----|
|    | 2  | 3 | 4 | 5 | 6 | 7 | 8 | 9 | 10 | 11 |
| E  | N  | I | S | D | P | T | S | P | L  | R  |
| 11 | 10 | 9 | 8 | 7 | 6 | 5 | 4 | 3 | 2  | 1  |

y

- peptide fragments, a,b,c: N-terminal, x,y,z: C-terminal series
- glycan fragments, H:Hex, N:HexNAc, S:Neu5Ac, F:Fuc
- intact peptide and glycan fragments, pep: intact peptide
- ( ): additions
- [ ]: charge

# m/z 1073.0382 charge 5 scan 0-0

Score= 73.15 , Hits= 60 , Explained Intensity= 0.46

Peptide: LG3BP\_HUMAN[394,407]:YKGLNLTEDTYKPR

Glycan: SHN(SHN)H(SHN(SHN)H)HN(F)N, S4H7N6F1

Charge: 5H

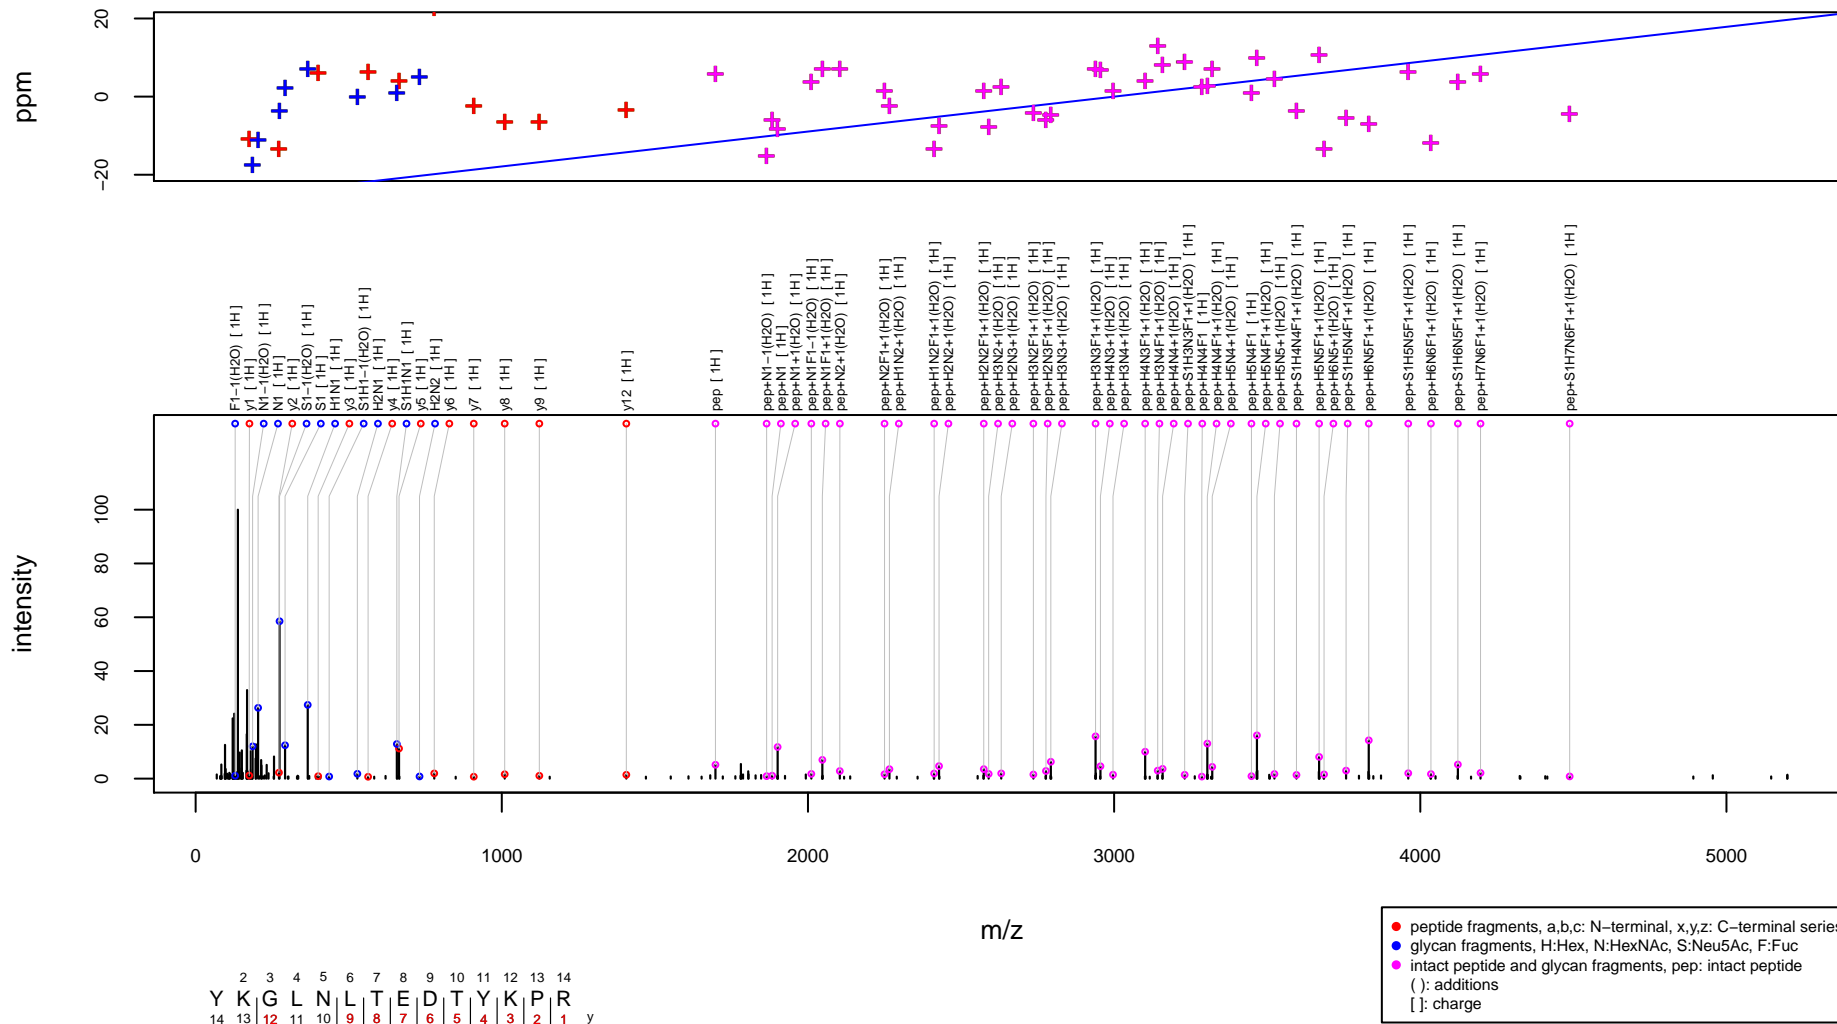

# m/z 863.3547 charge 4 scan 0-0

Score= 41.32 , Hits= 38 , Explained Intensity= 0.27

Peptide: MGA\_HUMAN[1672,1679]:NVTAYFPR

Glycan: H6N6F2

Charge: 4H

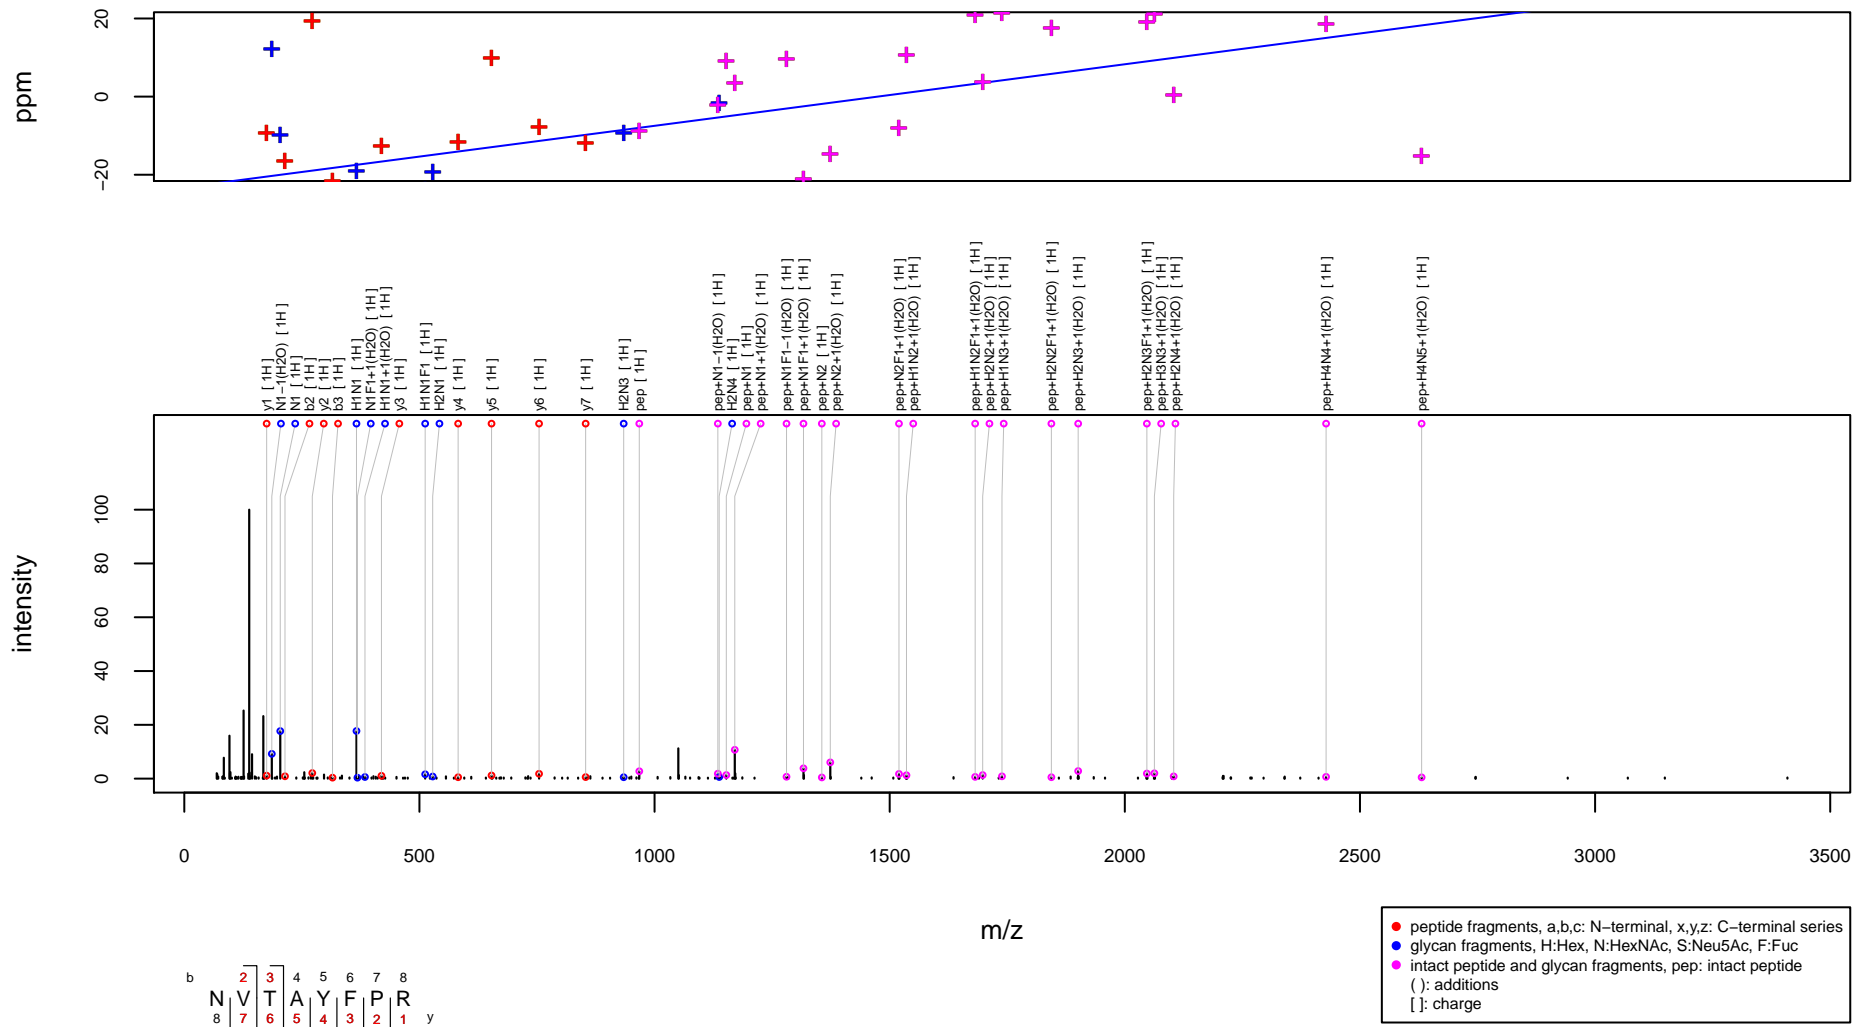

# m/z 1121.954 charge 4 scan 0-0

Score= 75.48 , Hits= 62 , Explained Intensity= 0.43

Peptide: LG3BP\_HUMAN[542,554]:AAIPALSDTNSSK

Glycan: SHNH(SHN(S(N)HN)H)HN(F)N, S3H6N6F1

Charge: 4H

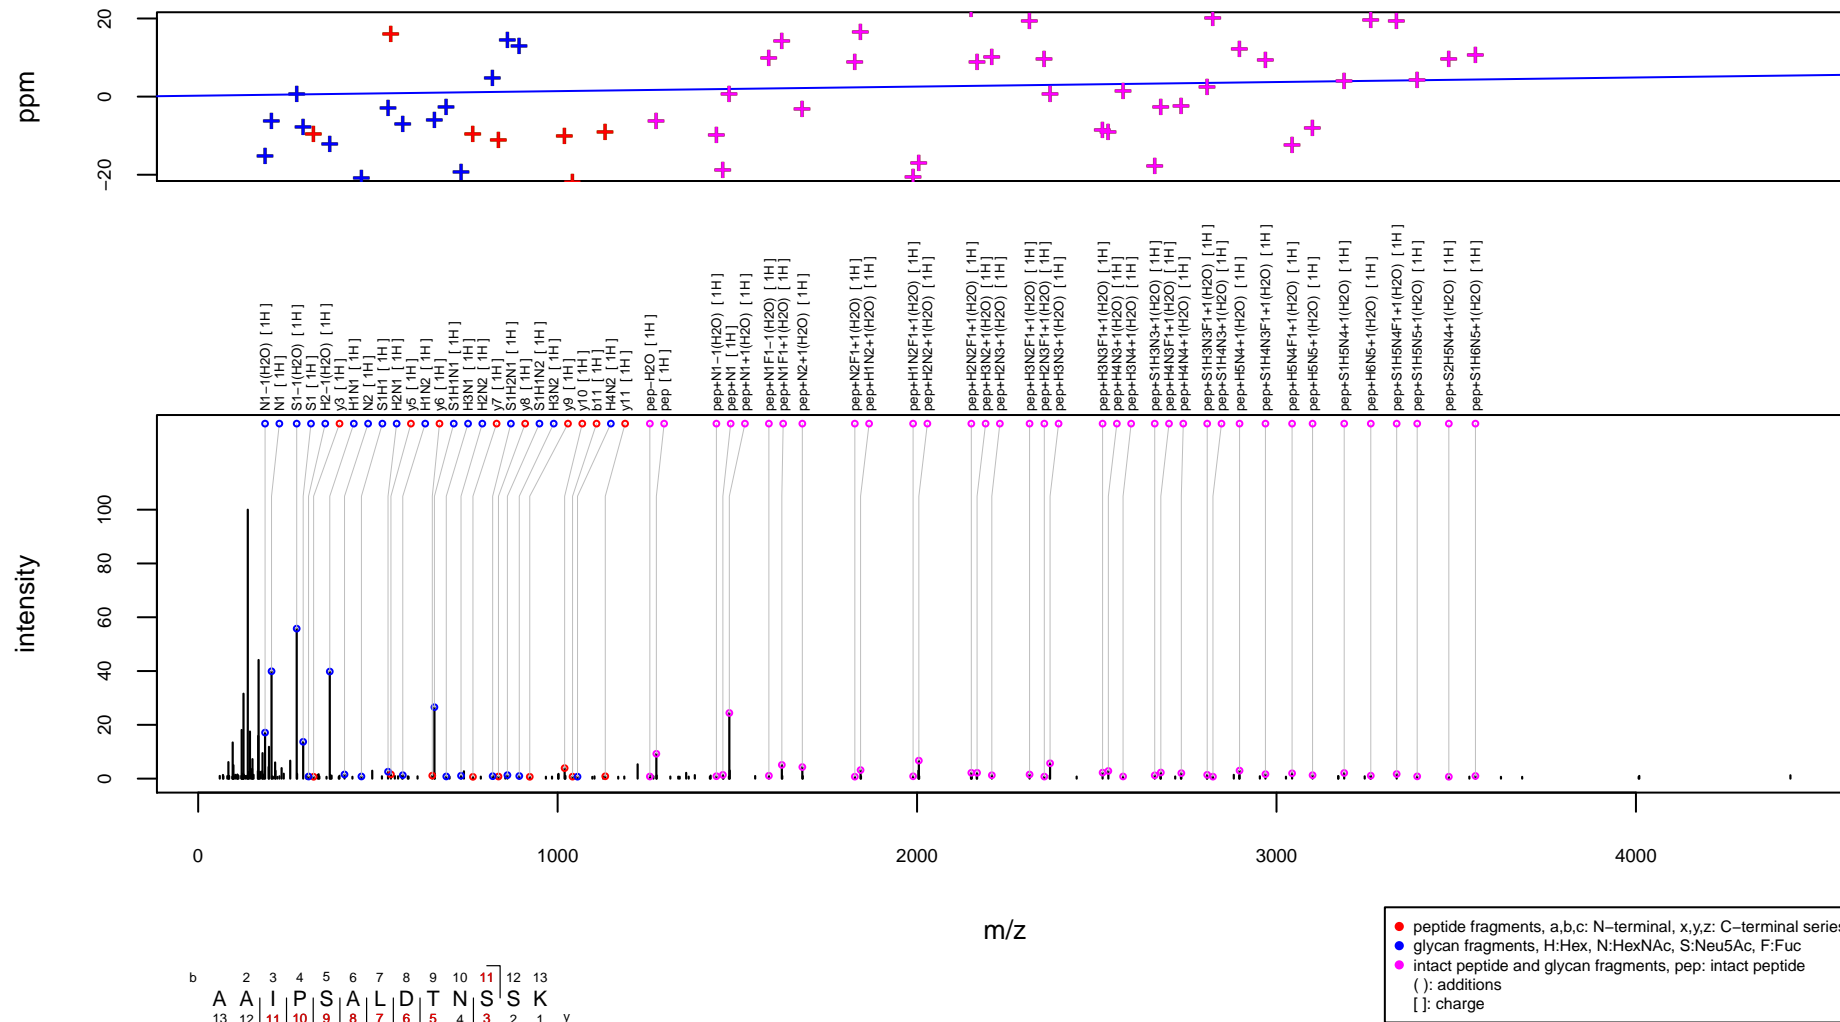

# m/z 1089.6945 charge 4 scan 0-0

Score= 55.18 , Hits= 62 , Explained Intensity= 0.42

Peptide: LG3BP\_HUMAN[542,554]:AAIPSAALDTNSK

Glycan: S2H7N6F1

Charge: 4H

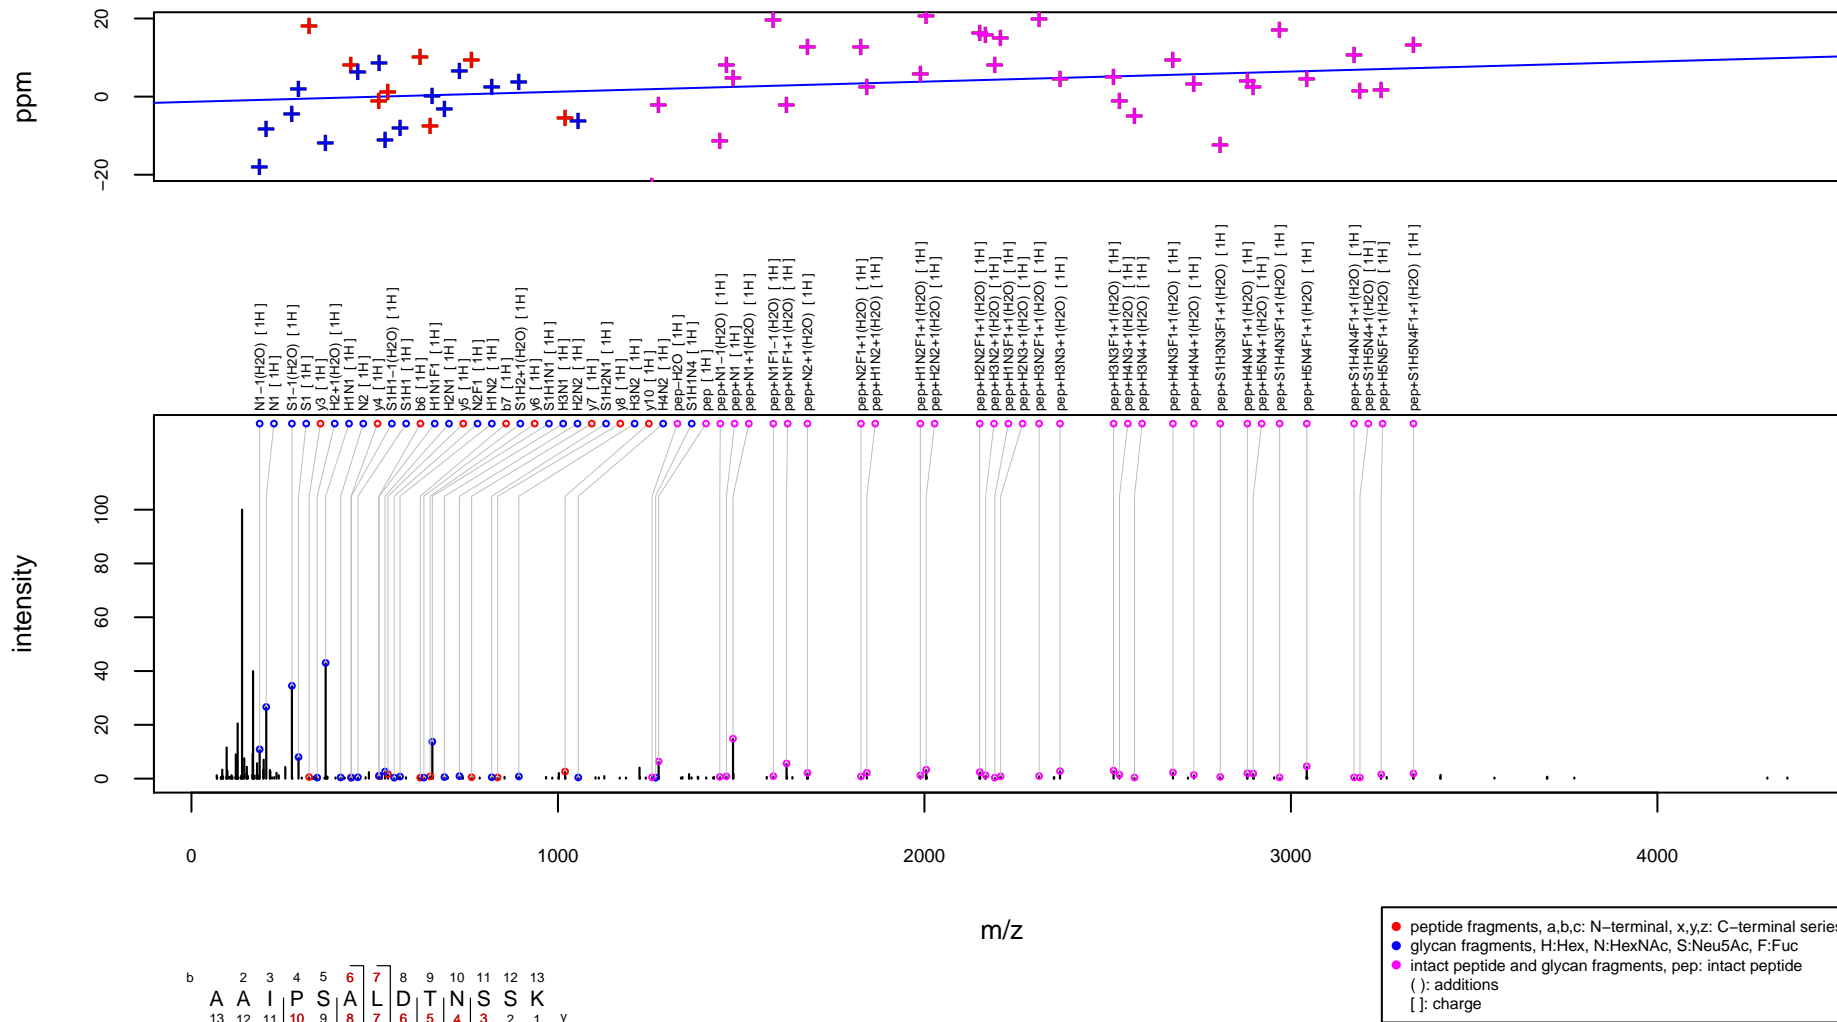





# m/z 980.4078 charge 3 scan 0-0

Score= 53.67 , Hits= 41 , Explained Intensity= 0.29

Peptide: MGA\_HUMAN[1672,1679]:NVTAYFPR

Glycan: H5N5F1

Charge: 3H

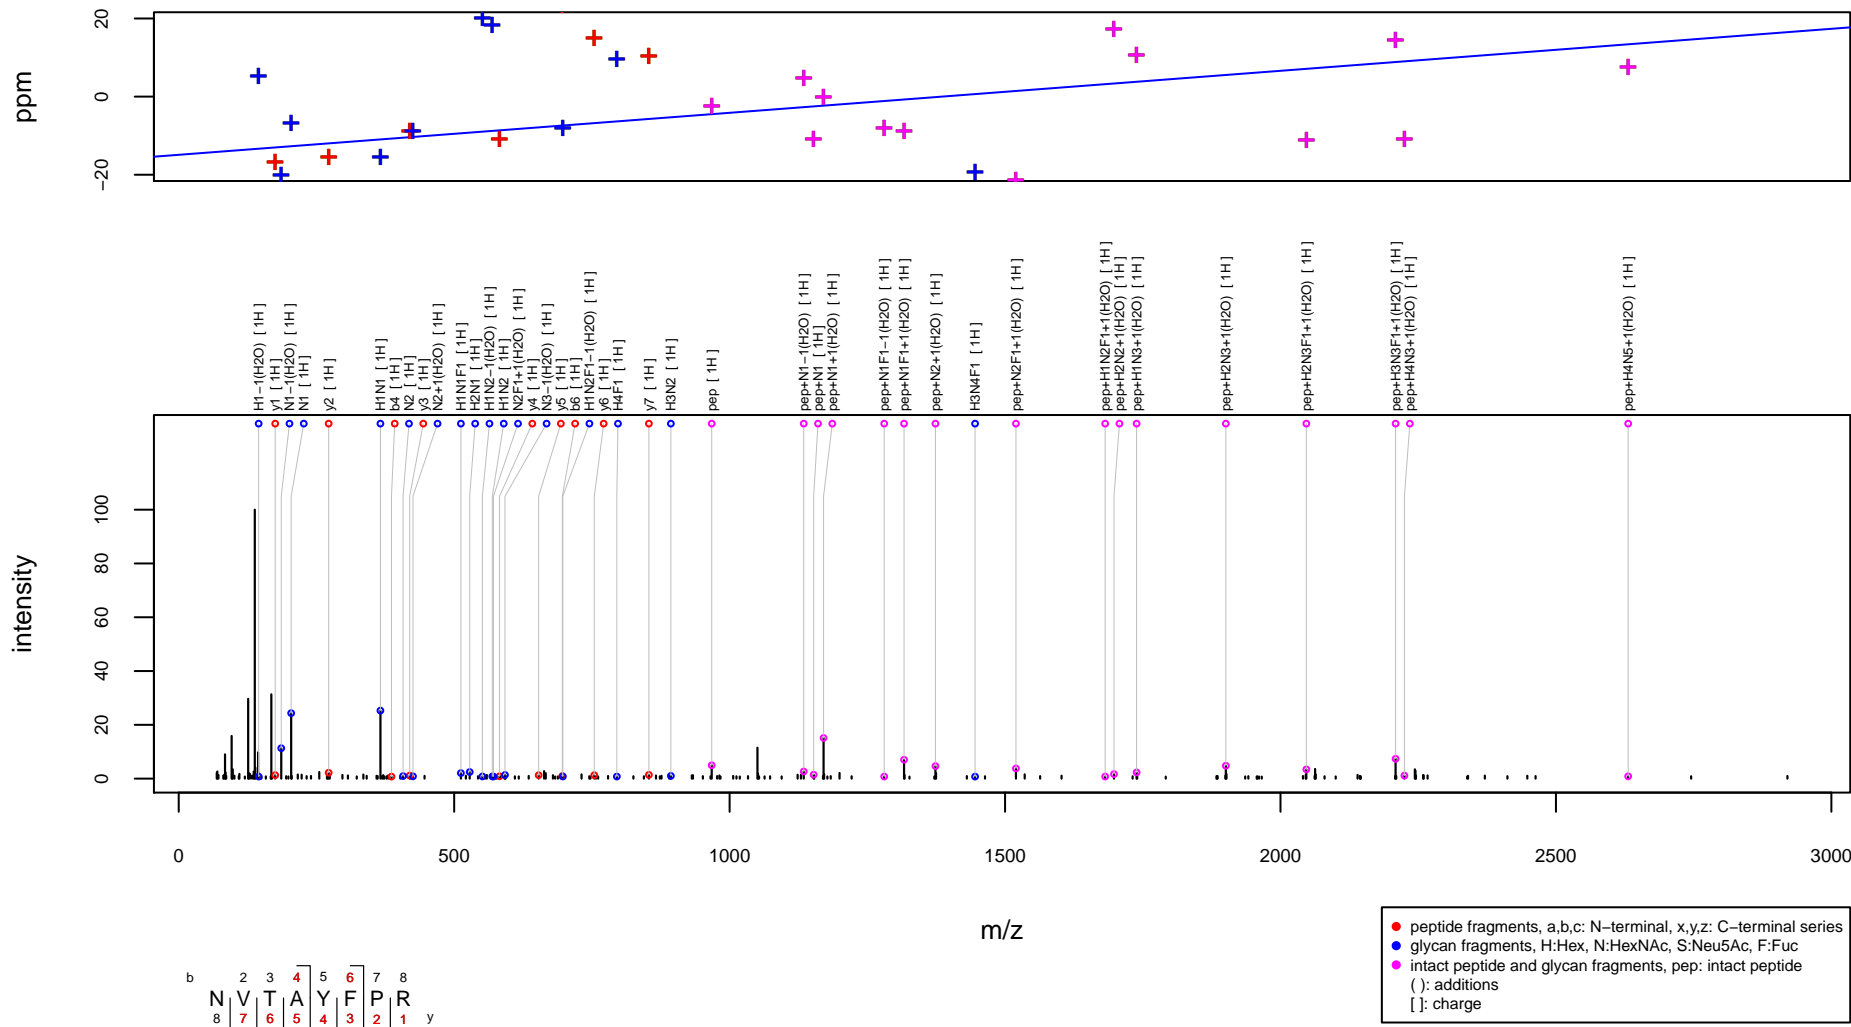

# m/z 1180.8235 charge 3 scan 0-0

Score= 54.81 , Hits= 37 , Explained Intensity= 0.37  
 Peptide: CUBN\_HUMAN[2526,2537]:LCSSVNVSN EIK  
 Glycan: HNH(HN(HN)H)(N)HNN, H6N6  
 Charge: 3H

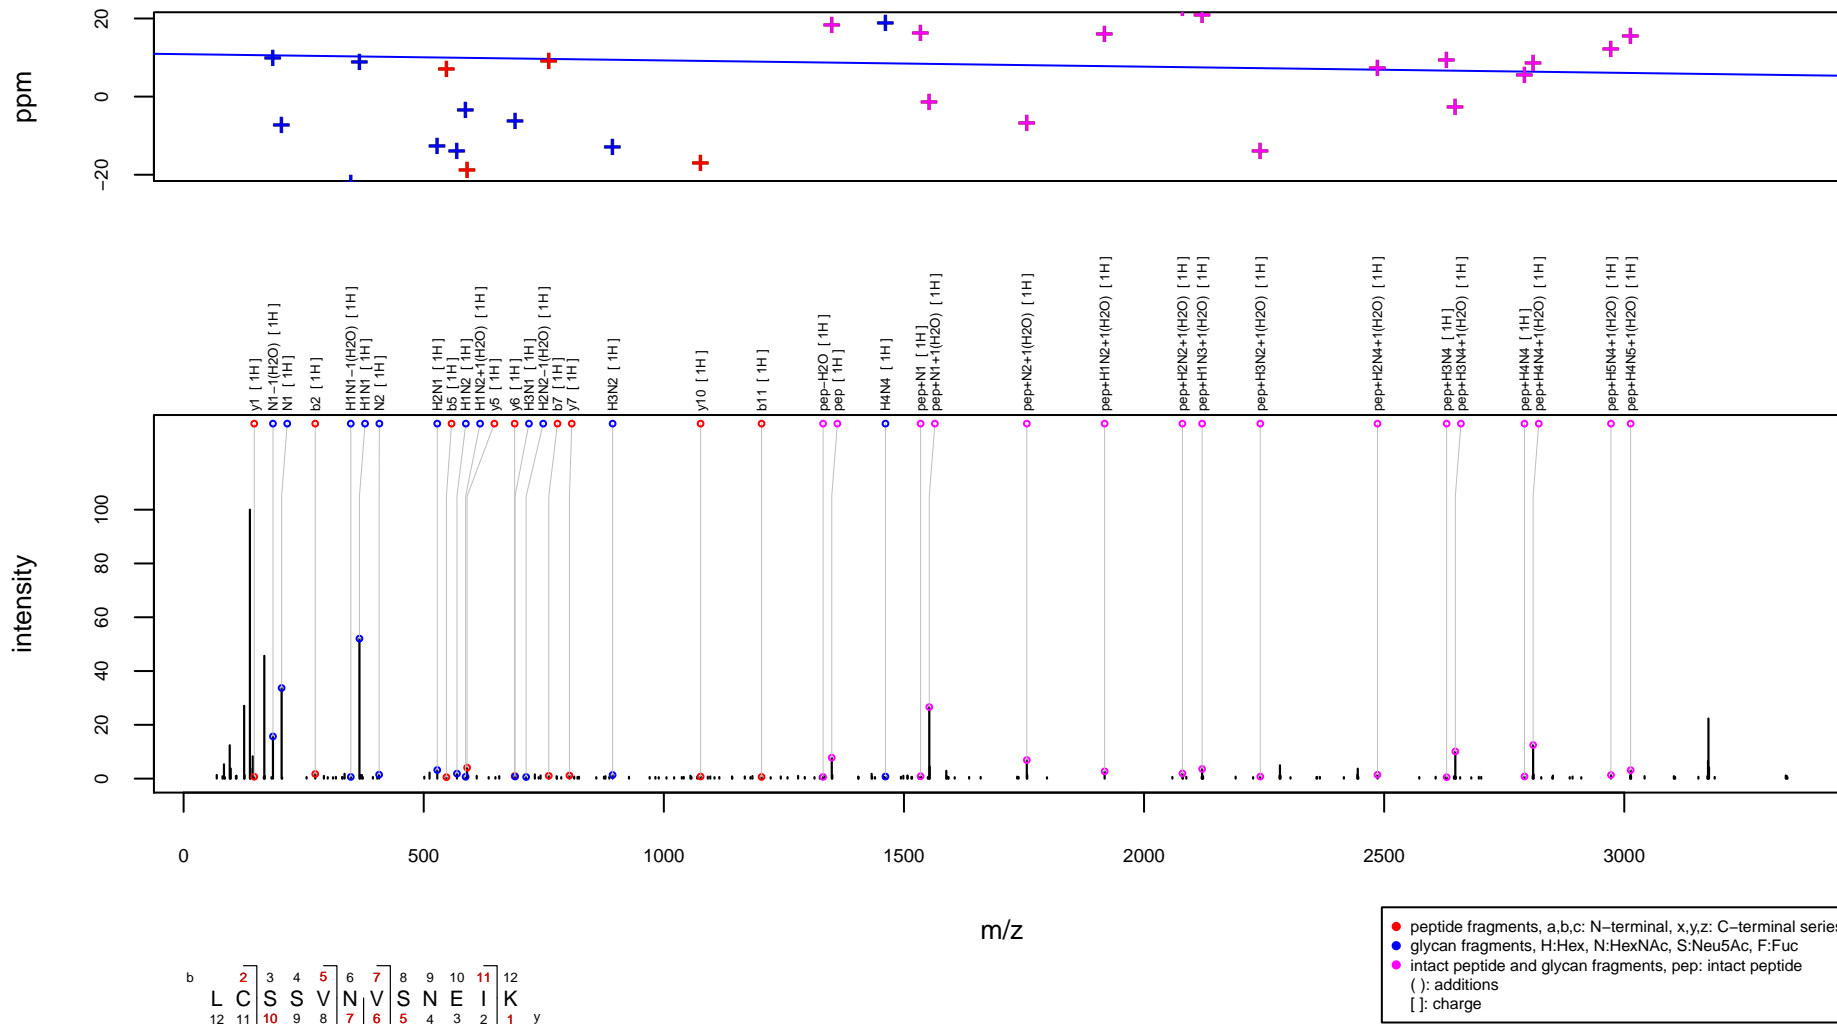

# m/z 1016.92 charge 4 scan 0-0

Score= 59.23 , Hits= 49 , Explained Intensity= 0.34

Peptide: LG3BP\_HUMAN[542,554]:AAIPSA LDTNSK

Glycan: SHN(HN)H(HN(HN)H)HN(F)N, S1H7N6F1

Charge: 4H

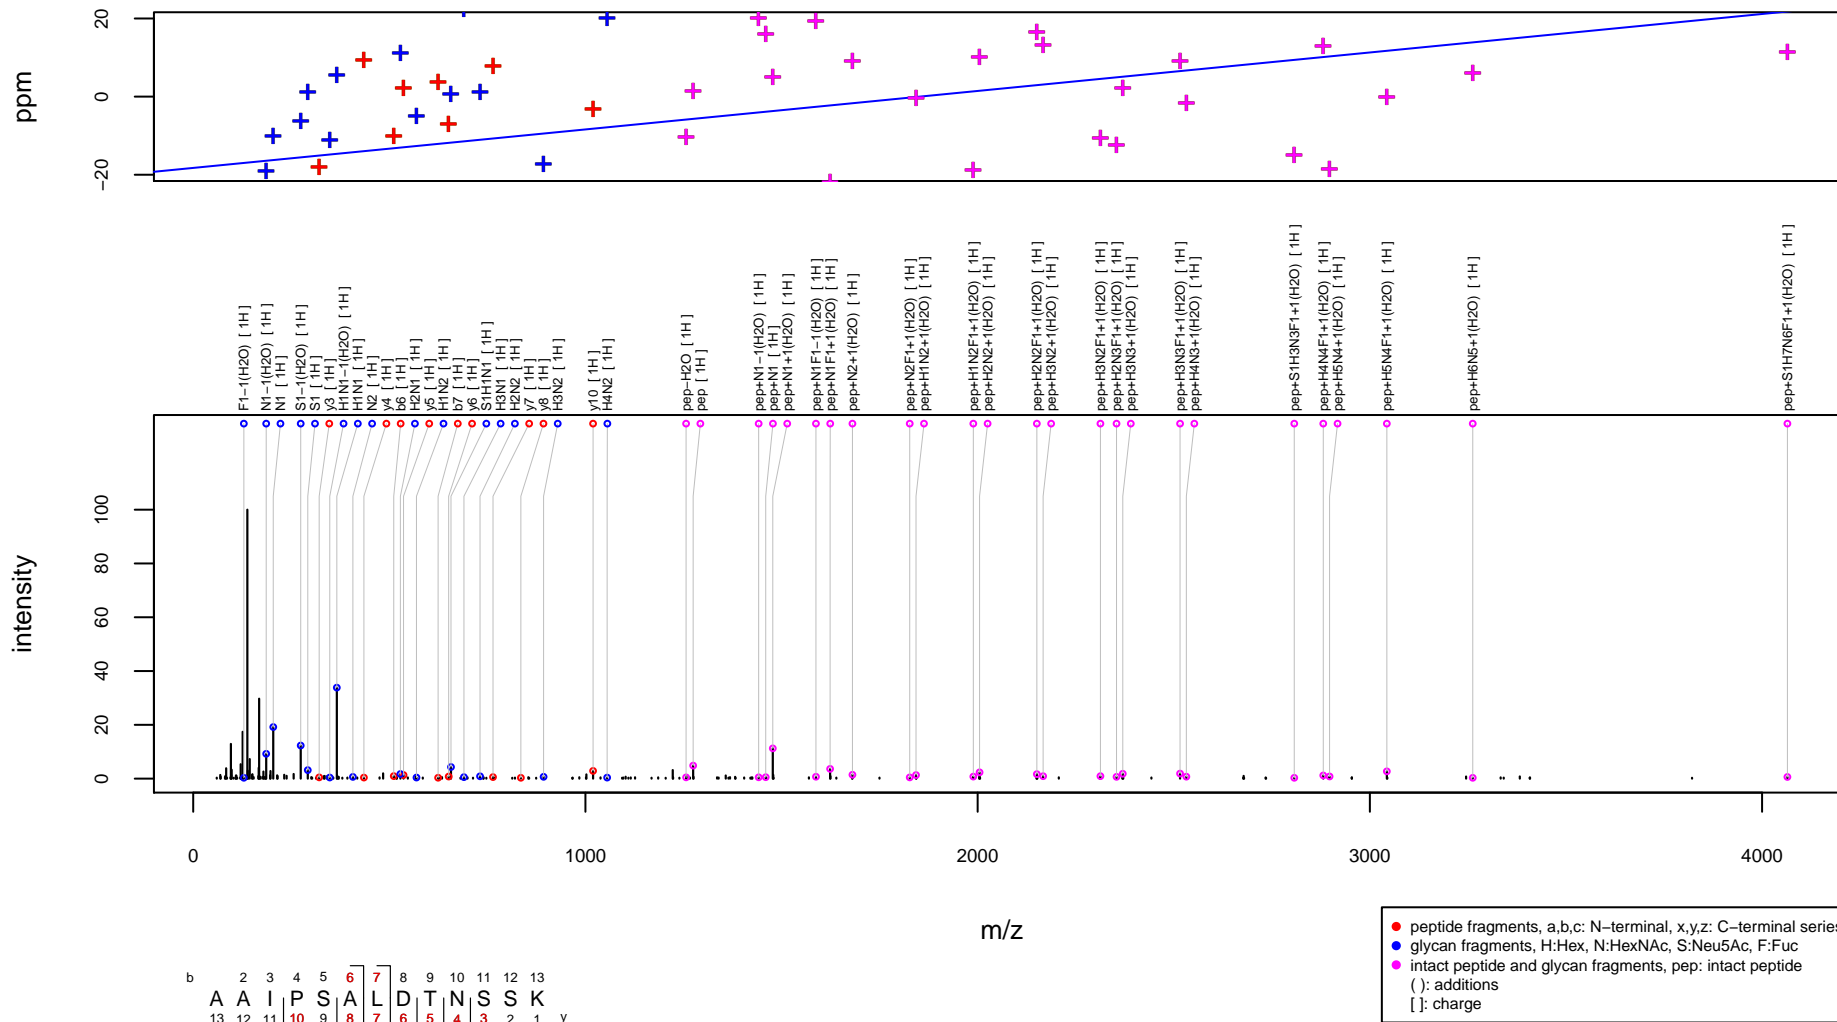

# m/z 1067.6907 charge 4 scan 0-0

Score= 44.13 , Hits= 48 , Explained Intensity= 0.35  
 Peptide: LG3BP\_HUMAN[542,554]:AAIPSAALDTNPSK  
 Glycan: S1H7N7F1  
 Charge: 4H

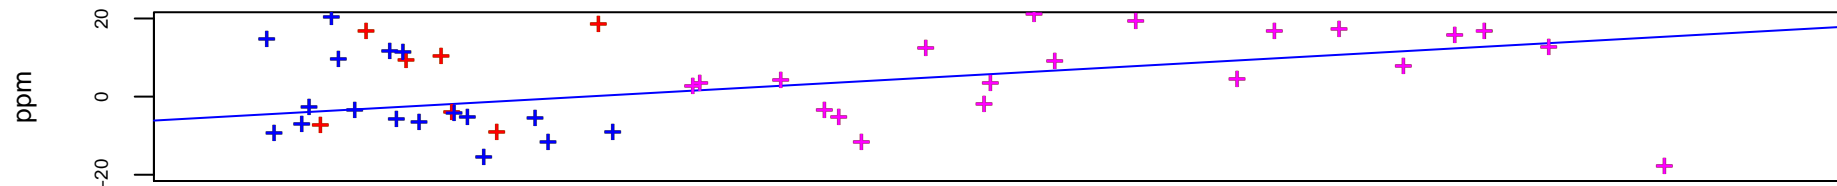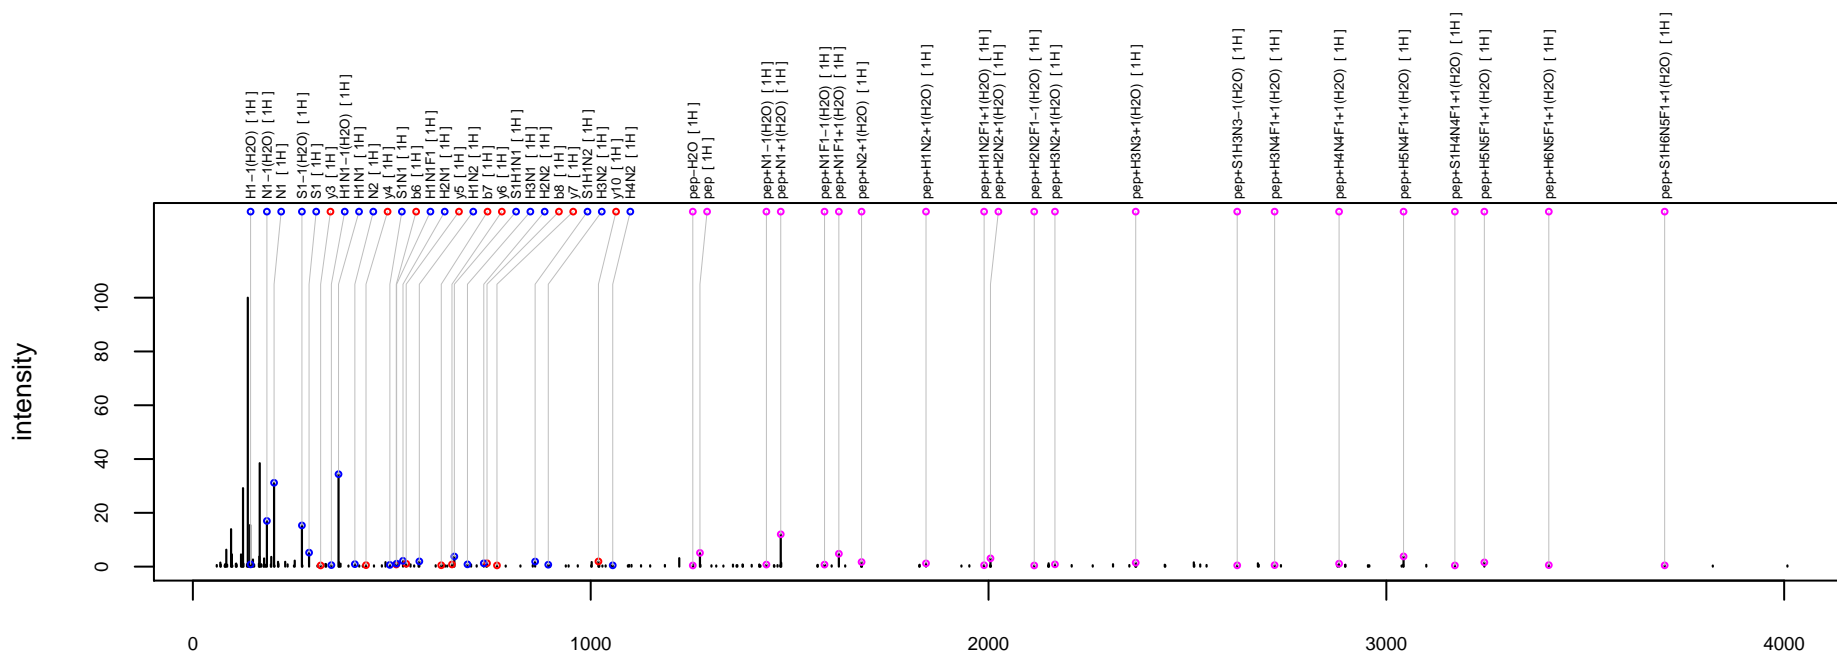

b 2 3 4 5 6 7 8 9 10 11 12 13  
 A A I P S A A L D T N P S K  
 13 12 11 10 9 8 7 6 5 4 3 2 1 y

● peptide fragments, a,b,c: N-terminal, x,y,z: C-terminal series  
 ● glycan fragments, H:Hex, N:HexNAc, S:Neu5Ac, F:Fuc  
 ● intact peptide and glycan fragments, pep: intact peptide  
 ( ): additions  
 [ ]: charge

# m/z 1049.1785 charge 4 scan 0-0

Score= 54.72 , Hits= 48 , Explained Intensity= 0.36

Peptide: LG3BP\_HUMAN[542,554]:AAIP<sup>S</sup>ALDTN<sup>S</sup>SK

Glycan: SHN(S(N)HN)H(HNH)HN(F)N, S2H6N6F1

Charge: 4H

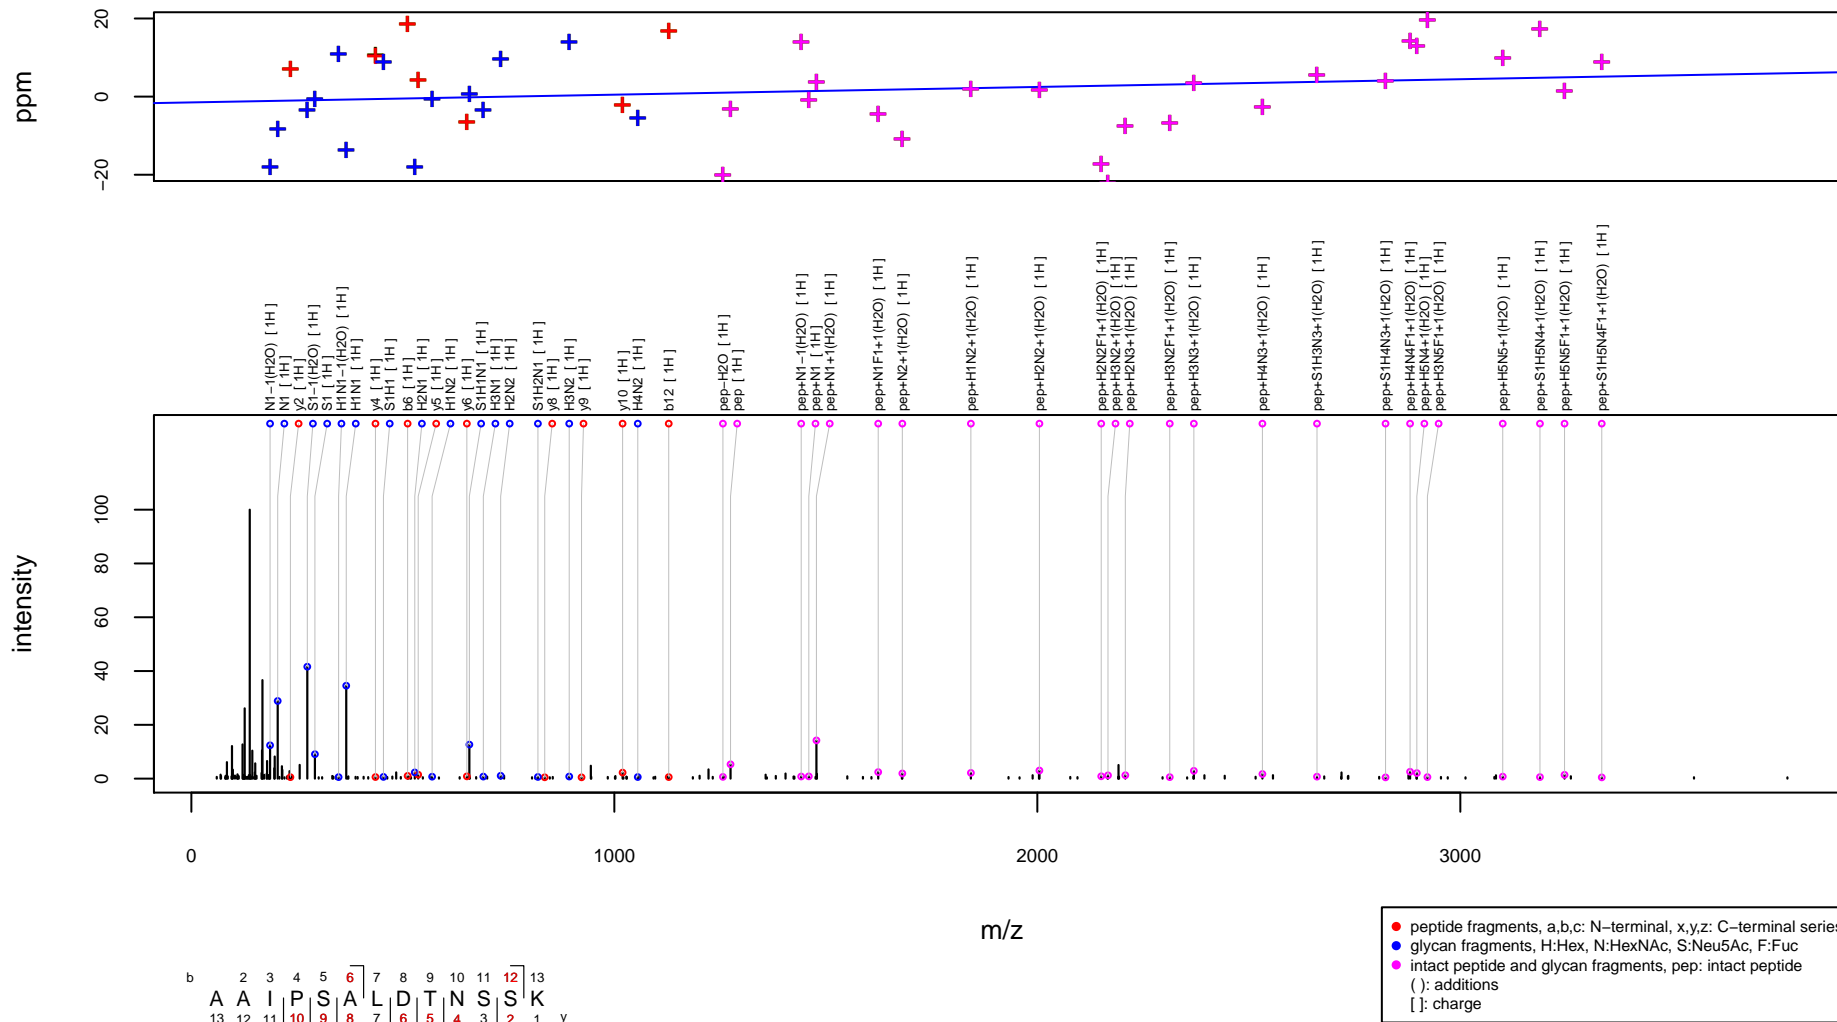

# m/z 1125.8085 charge 3 scan 0-0

Score= 64.81 , Hits= 47 , Explained Intensity= 0.41

Peptide: LG3BP\_HUMAN[542,554]:AAIP<sup>S</sup>ALD<sup>T</sup>NSSK

Glycan: SNNH(HNH)HN(F)N, S1H4N5F1

Charge: 3H

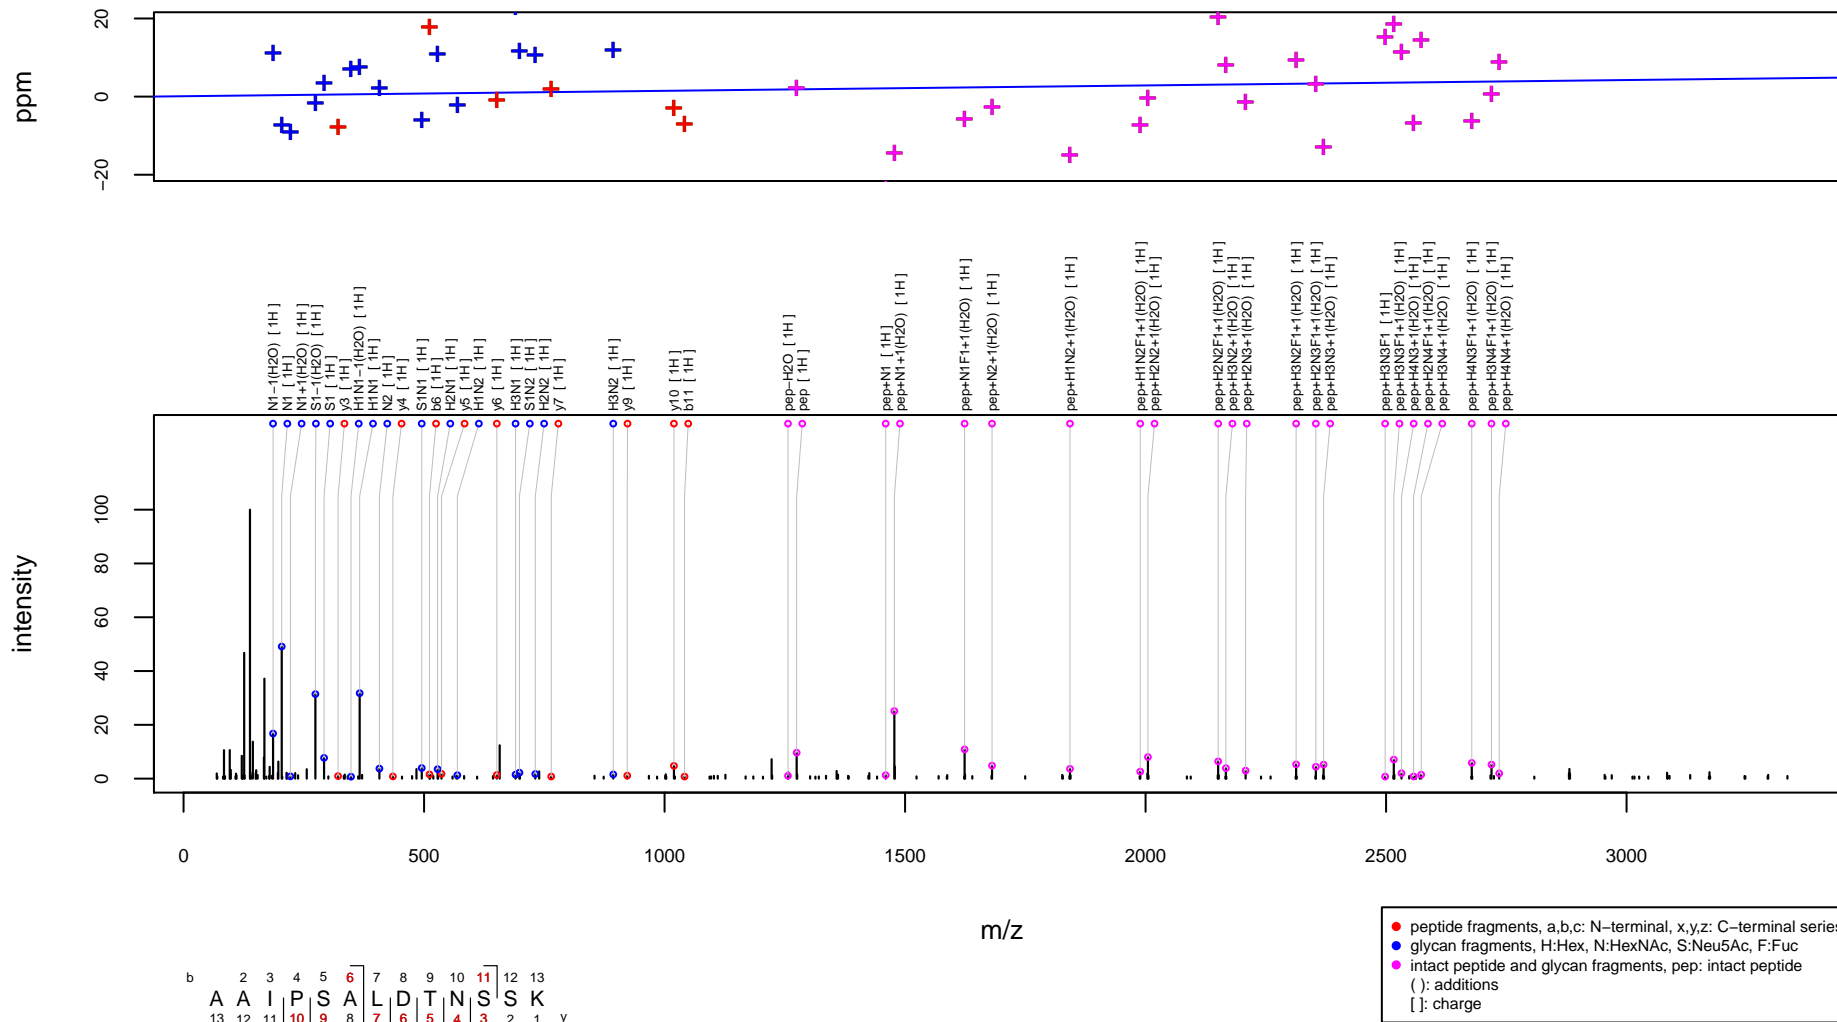

# m/z 1318.776 charge 4 scan 0-0

Score= 36.02 , Hits= 41 , Explained Intensity= 0.31

Peptide: UROM\_HUMAN[223,245]:CNTAAPMWLNGTHPSSDEGIVSR

Glycan: S3H4N4F3

Charge: 4H

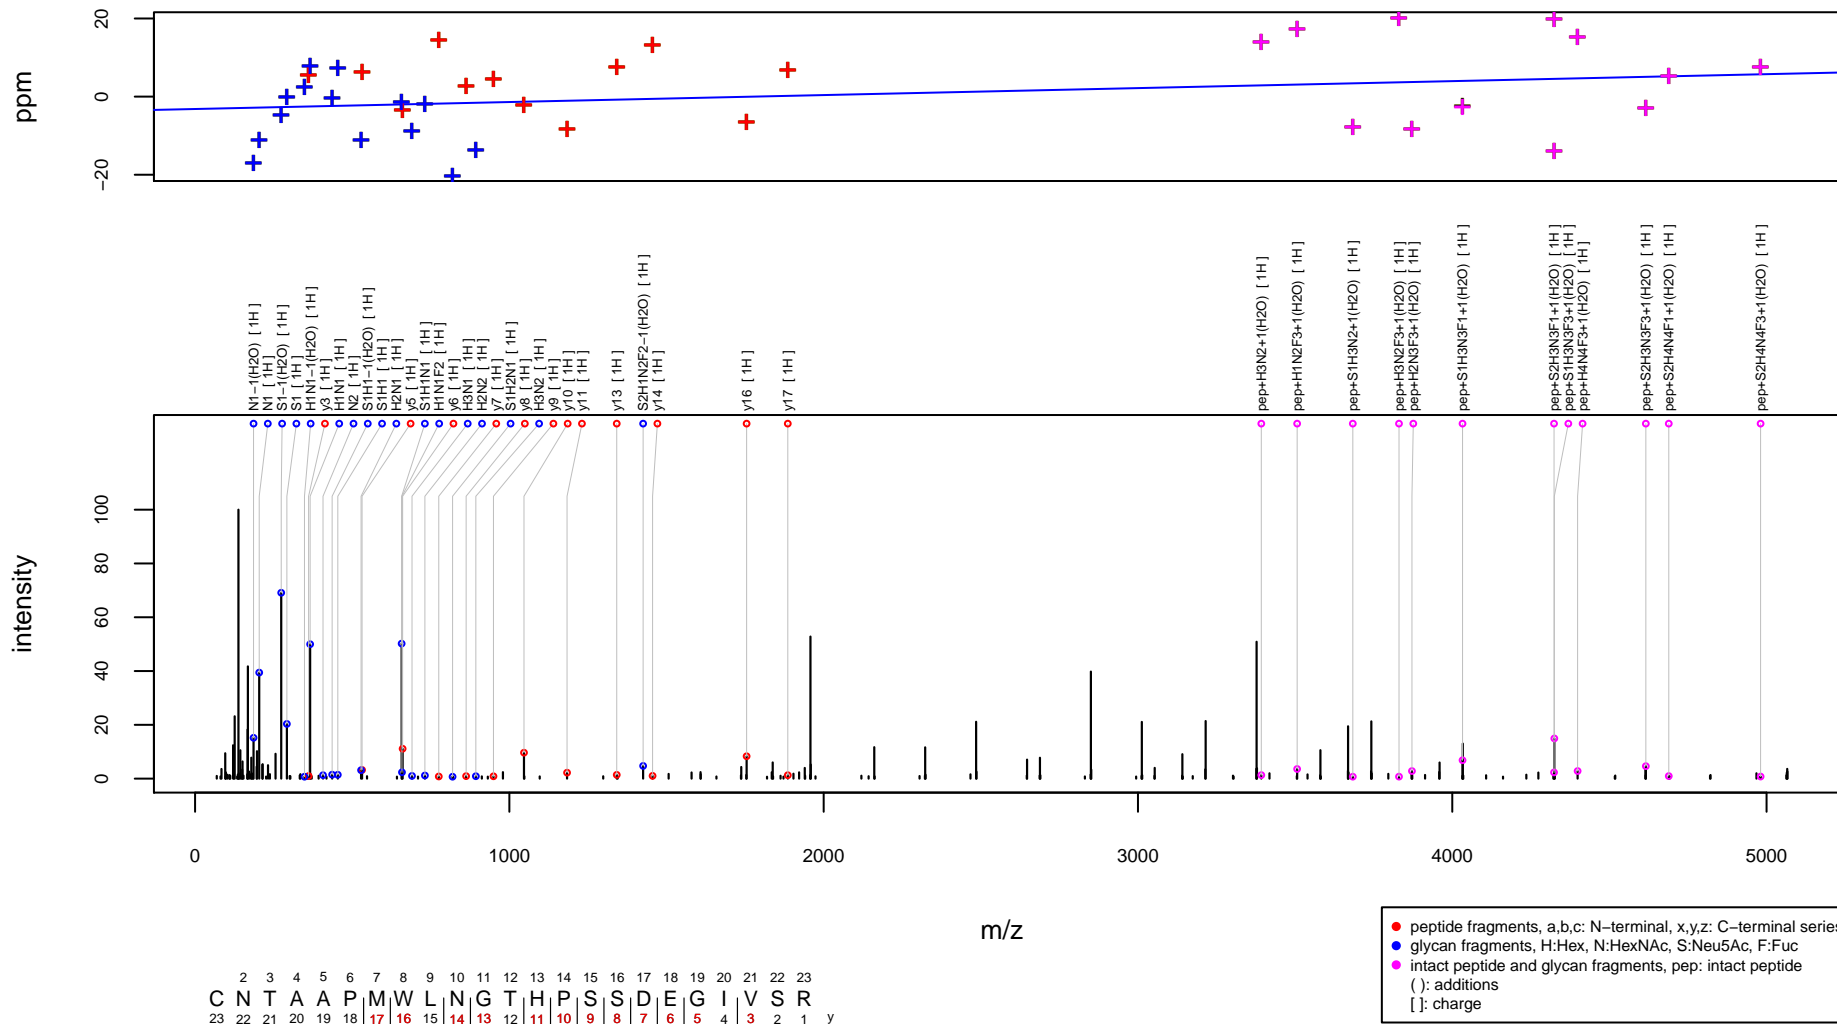



# m/z 1105.7849 charge 3 scan 0-0

Score= 60.61 , Hits= 45 , Explained Intensity= 0.42

Peptide: CUBN\_HUMAN[2082,2090]:AGFNASFHK

Glycan: HNH(HN(HN)H)(N)HN(F)N, H6N6F1

Charge: 3H

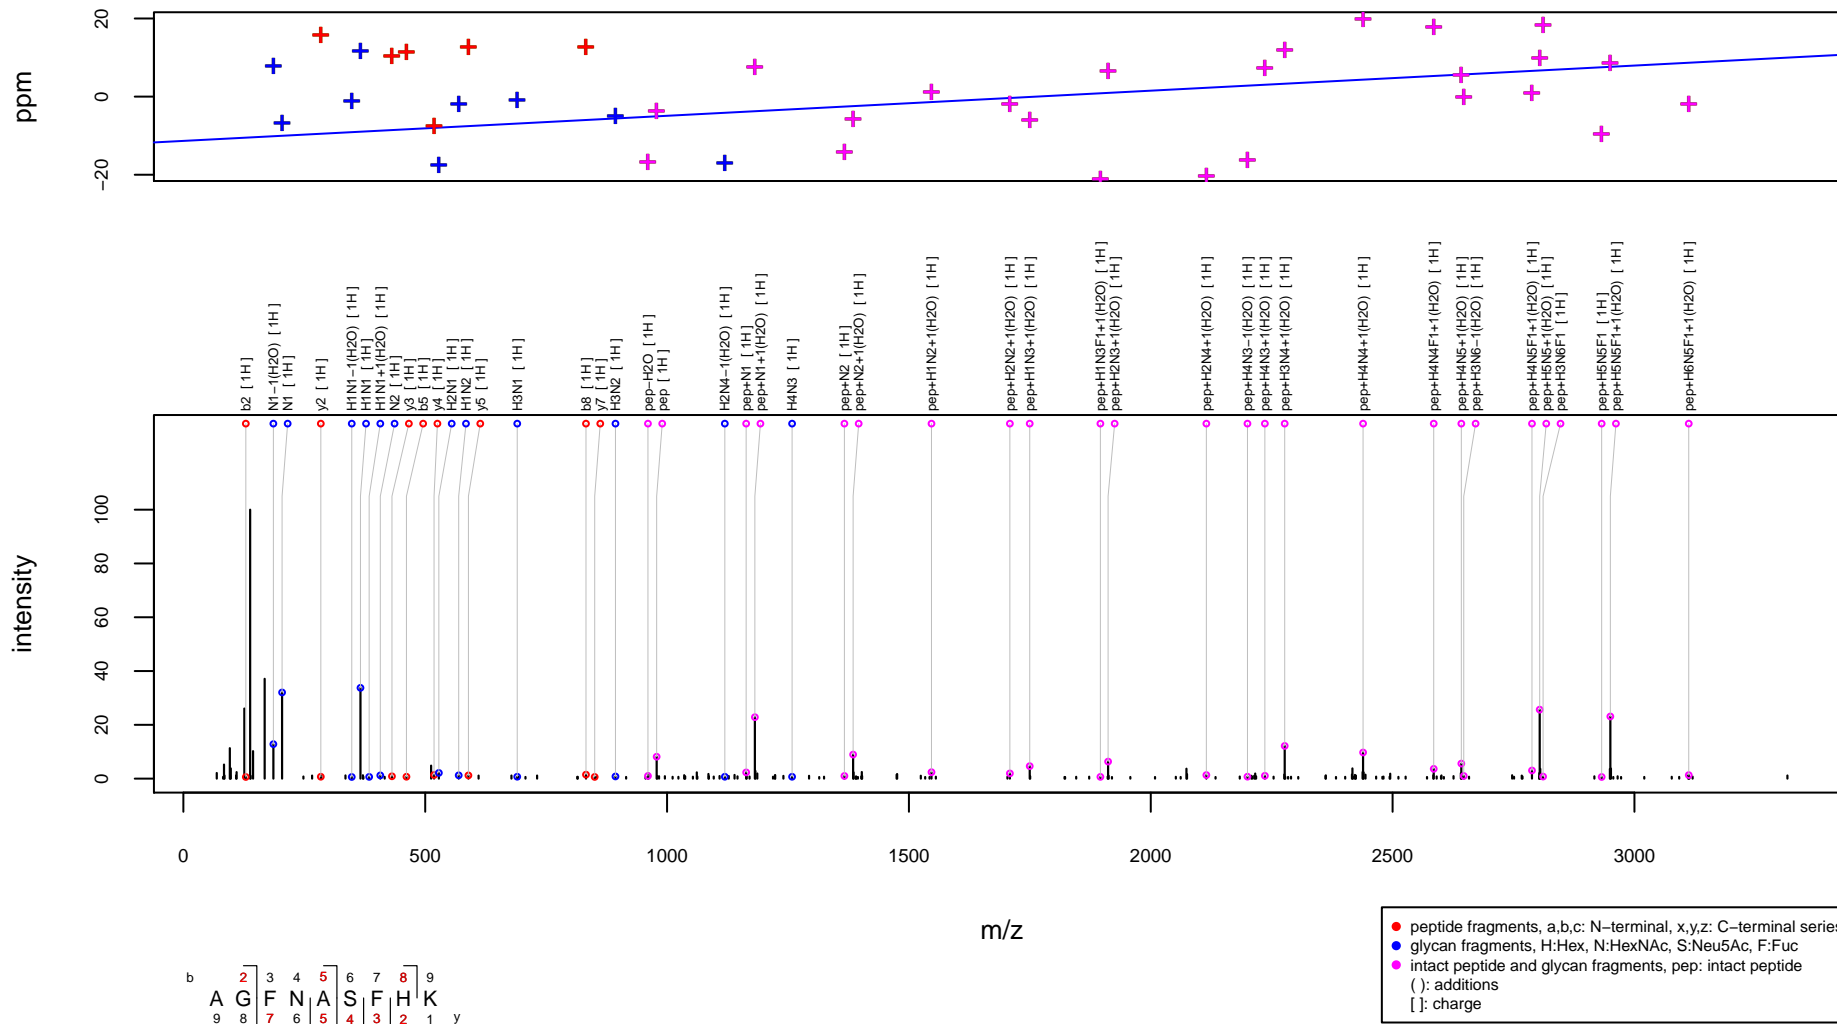

# m/z 995.7552 charge 3 scan 0-0

Score= 47.74 , Hits= 32 , Explained Intensity= 0.33

Peptide: LG3BP\_HUMAN[542,554]:AAIPSAALDTNSISK

Glycan: SHNH(HH)HNN, S1H5N3

Charge: 3H

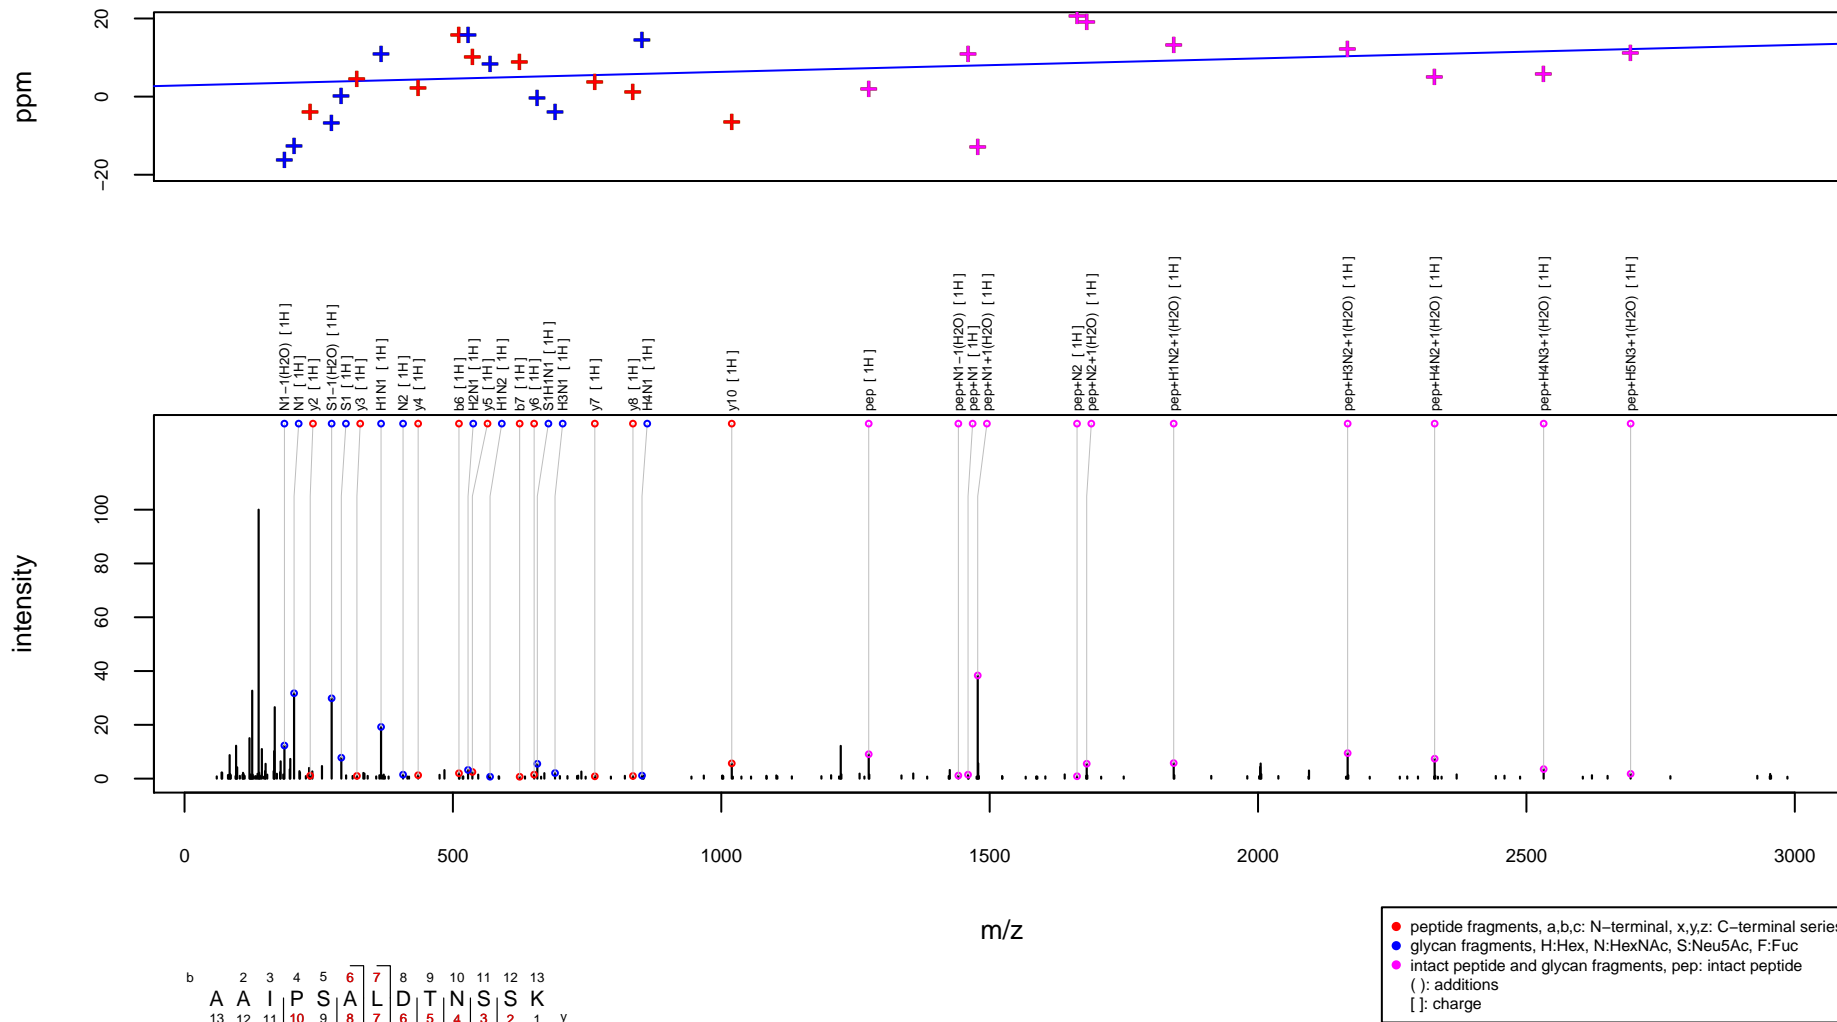

# m/z 944.7243 charge 3 scan 0-0

Score= 70.63 , Hits= 51 , Explained Intensity= 0.38

Peptide: LRP2\_HUMAN[1550,1555]:NLTNPR

Glycan: FHNH(HNH)(N)HN(F)N, H5N5F2

Charge: 3H

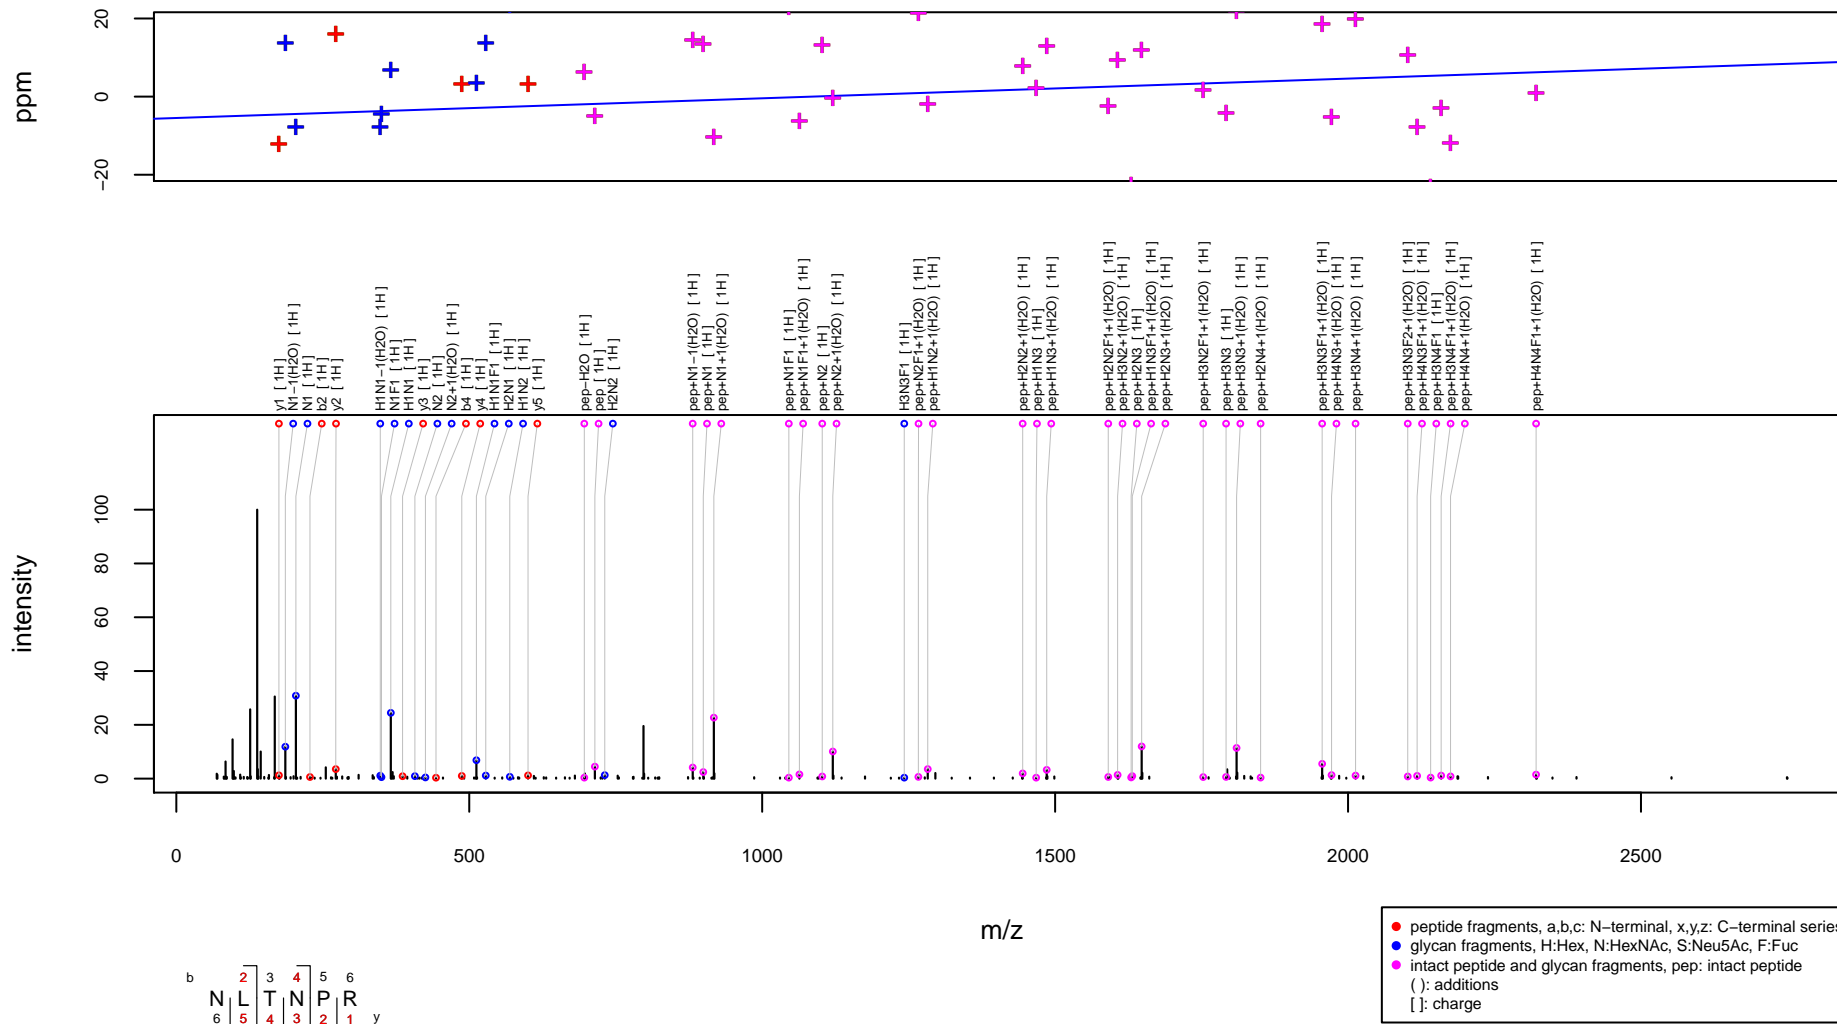

# m/z 1058.1147 charge 3 scan 0-0

Score= 67.58 , Hits= 47 , Explained Intensity= 0.39

Peptide: LG3BP\_HUMAN[542,554]:AAIPSAALDITNSK

Glycan: SHNH(NH)HN(F)N, S1H4N4F1

Charge: 3H

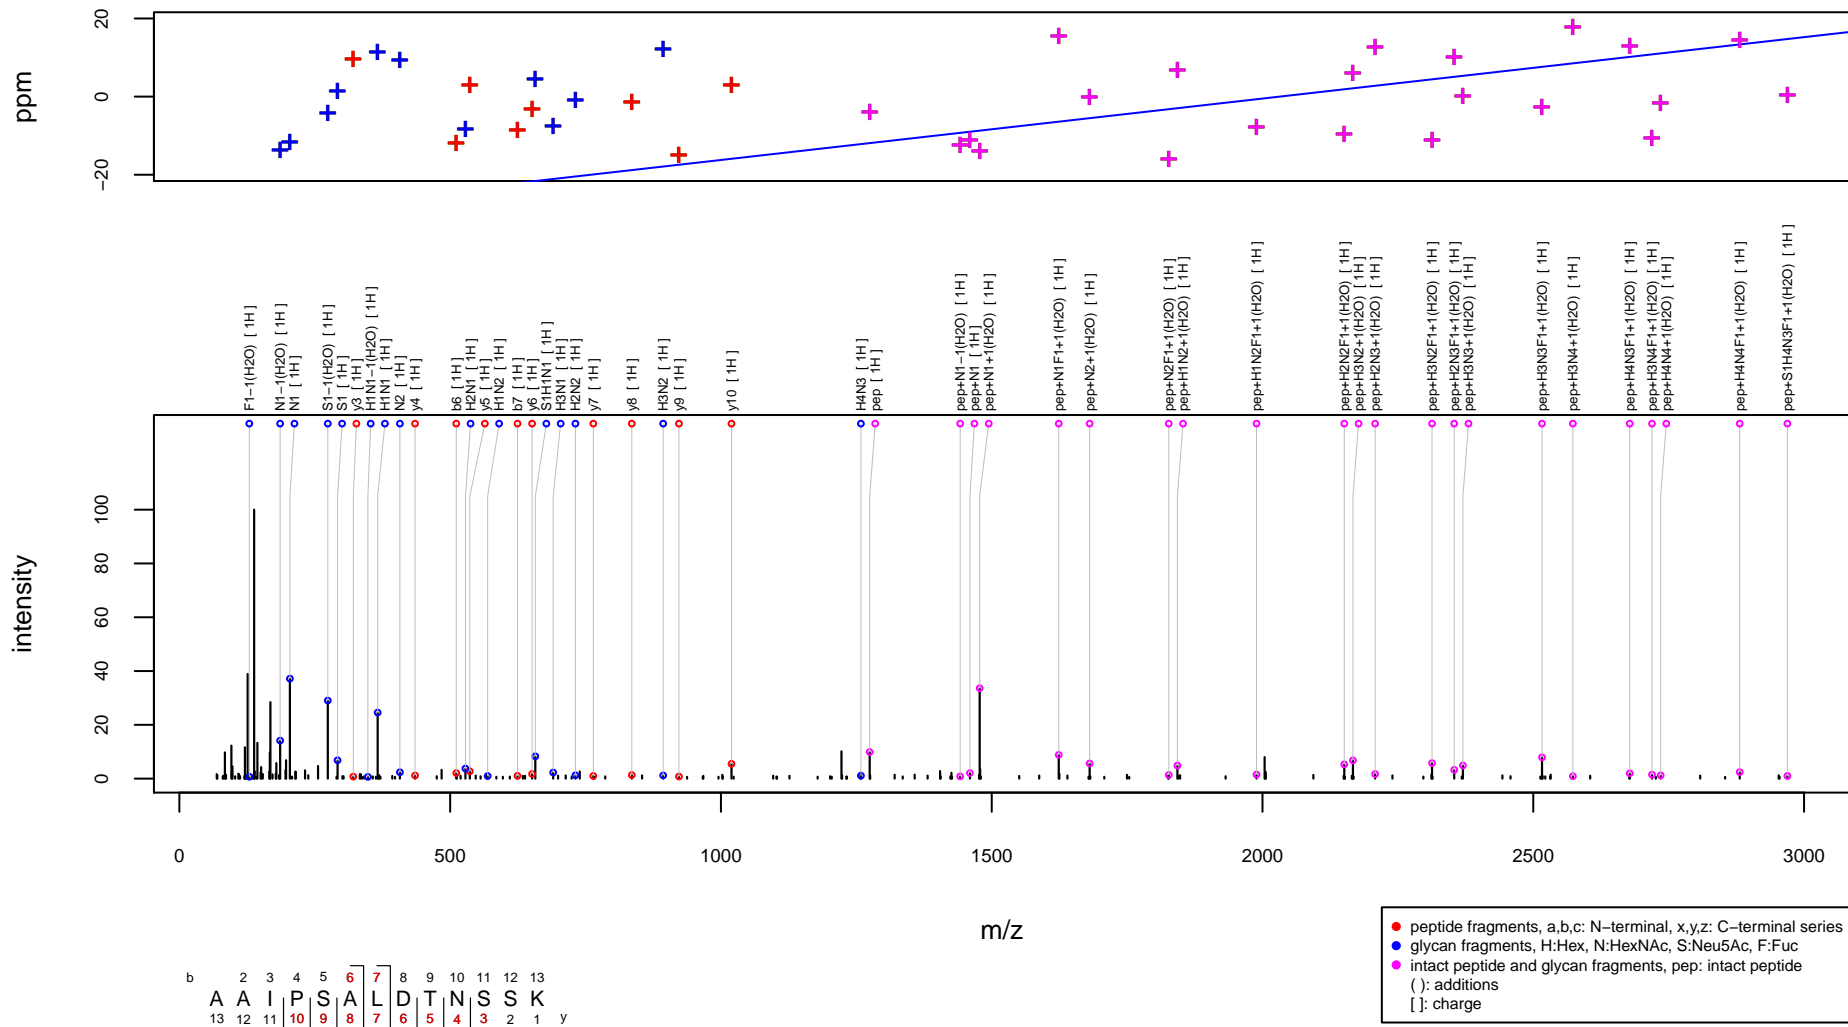

# m/z 896.0397 charge 3 scan 0-0

Score= 61.8 , Hits= 43 , Explained Intensity= 0.36

Peptide: LRP2\_HUMAN[1550,1555]:NLTNPR

Glycan: HNH(HNH)(N)HN(F)N, H5N5F1

Charge: 3H

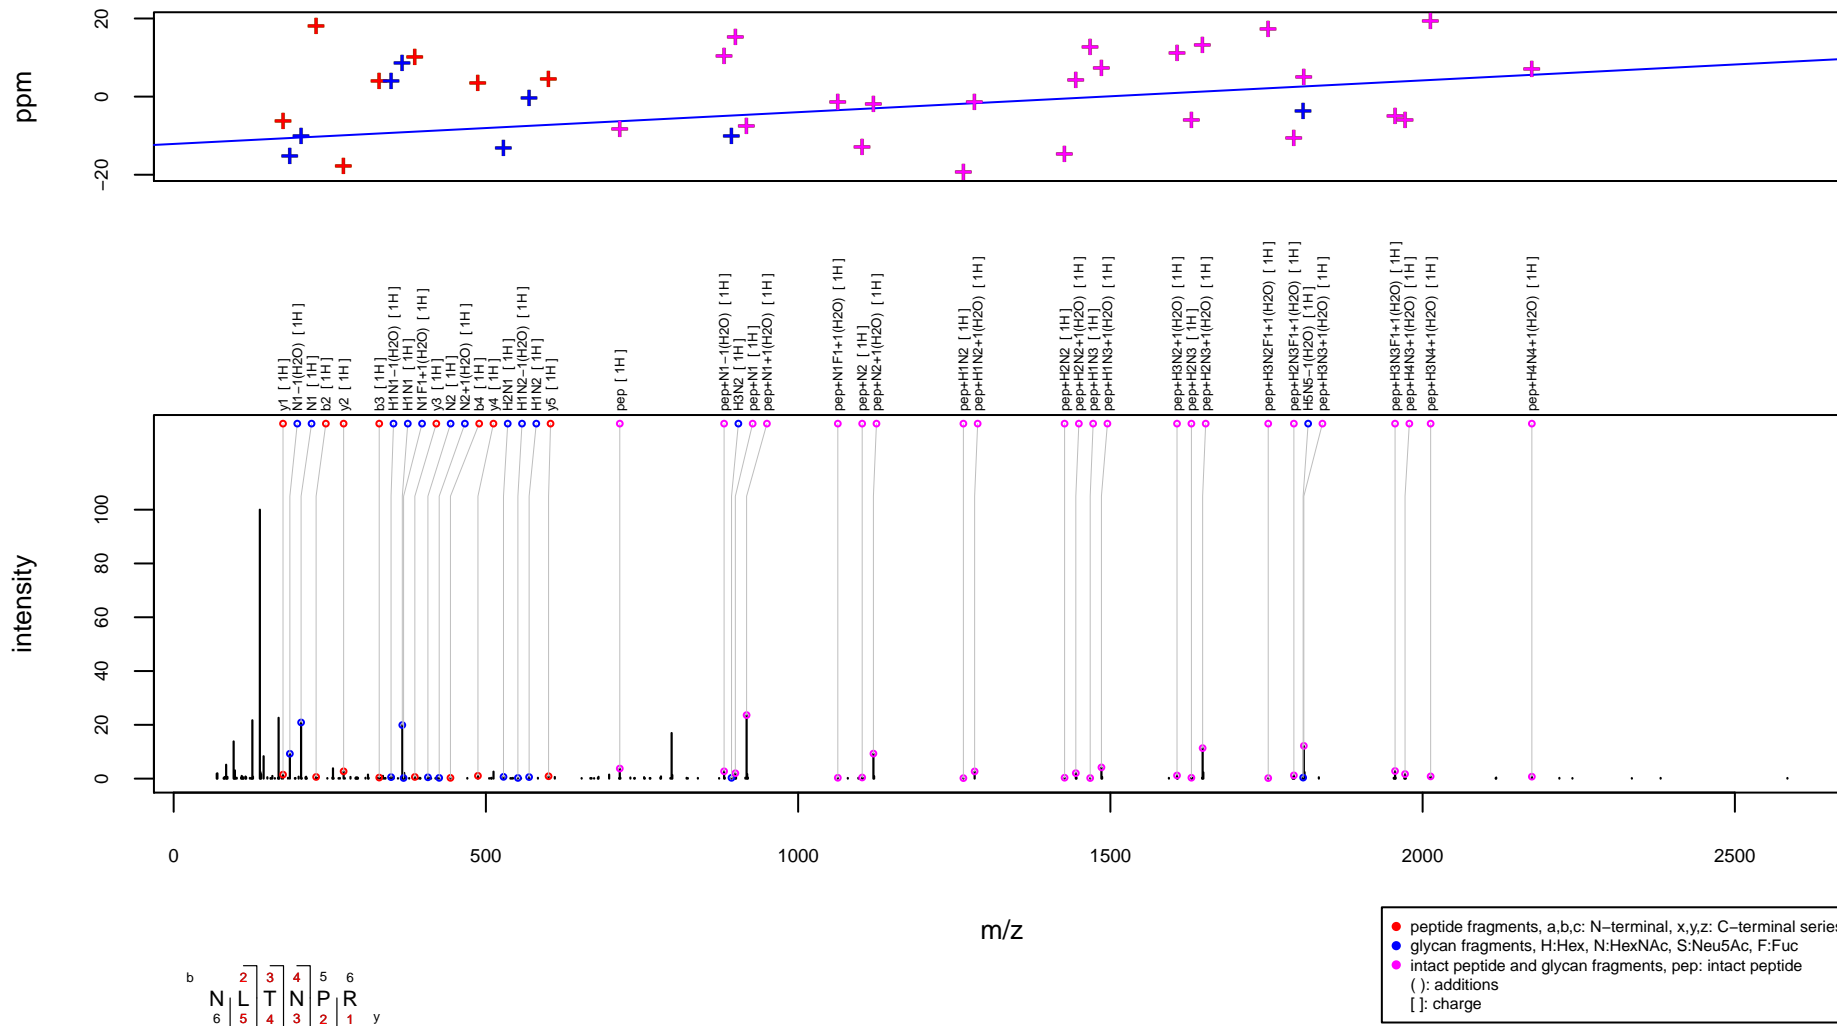

# m/z 976.0581 charge 3 scan 0-0

Score= 76.41 , Hits= 49 , Explained Intensity= 0.38

Peptide: IGHG2\_HUMAN[172,180]:EEQFNSTFR

Glycan: HNH(HNH)HN(F)N, H5N4F1

Charge: 3H

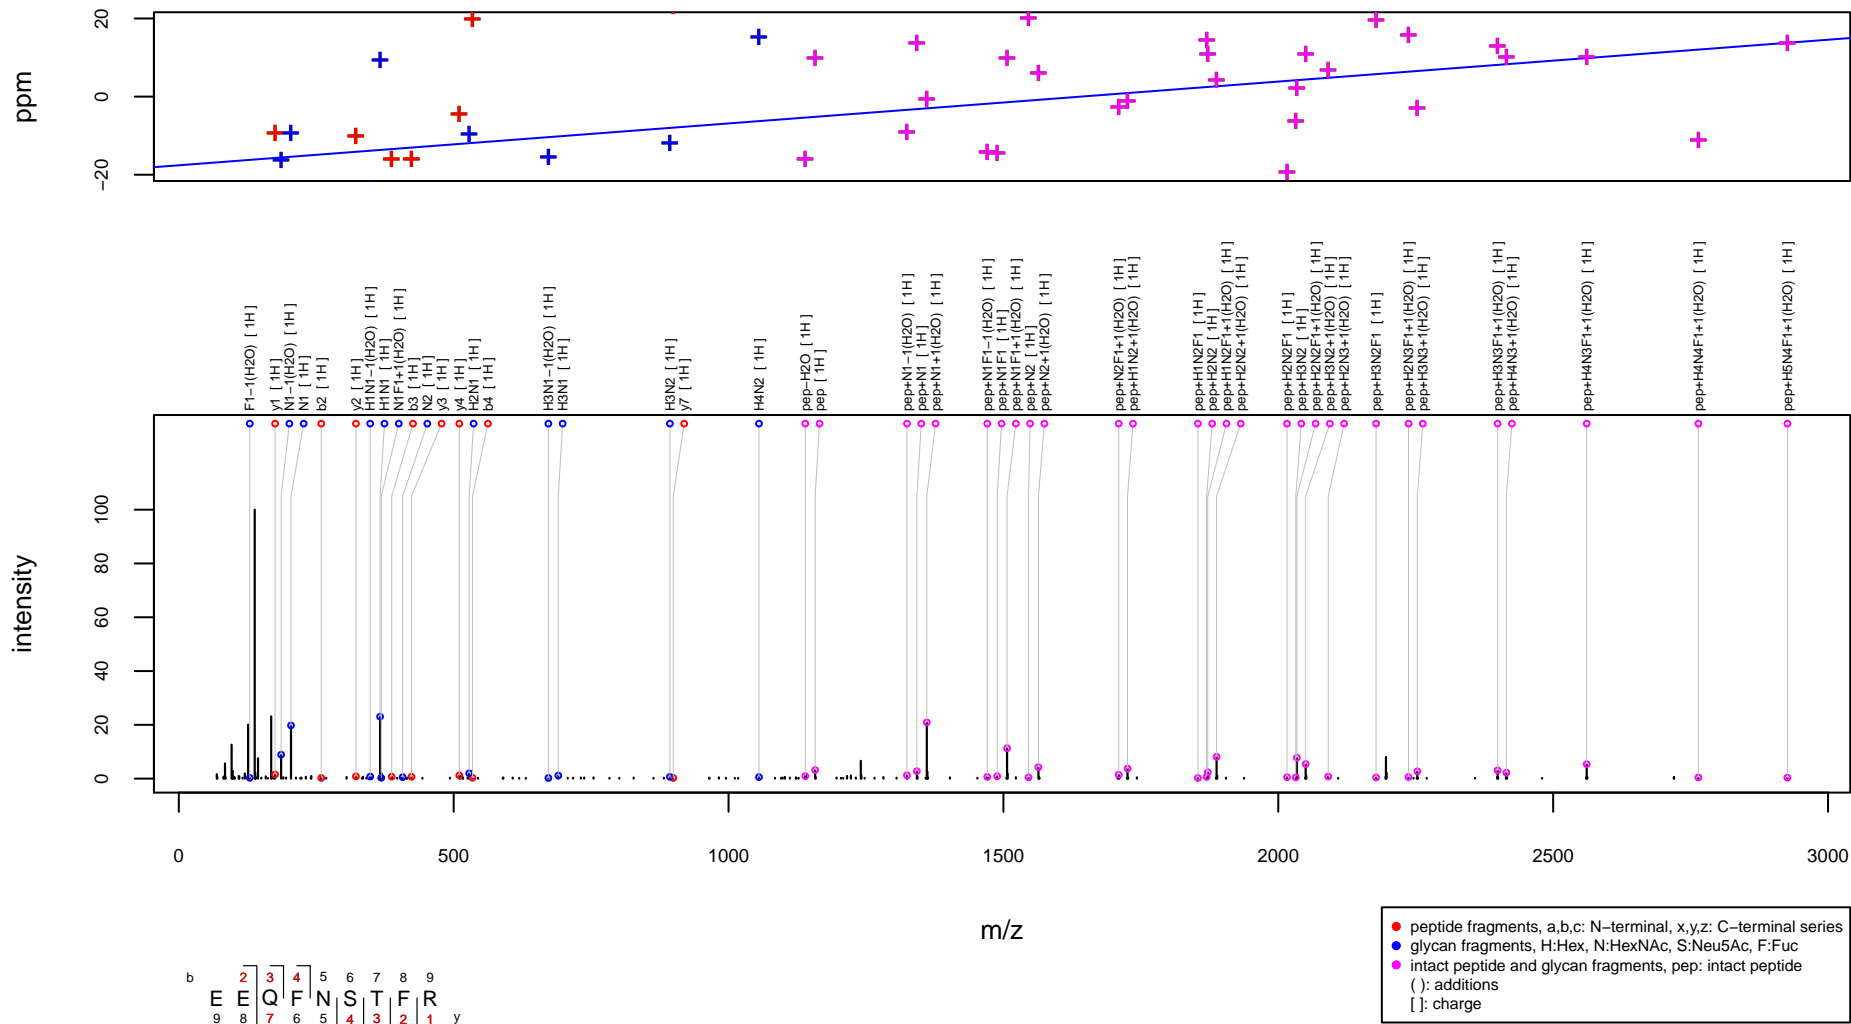



# m/z 1014.809 charge 5 scan 0-0

Score= 59.86 , Hits= 51 , Explained Intensity= 0.39

Peptide: LG3BP\_HUMAN[396,407]:GLNLTEDTYKPR

Glycan: SHN(SHN)H(SHN(SHN)H)HN(F)N, S4H7N6F1

Charge: 5H

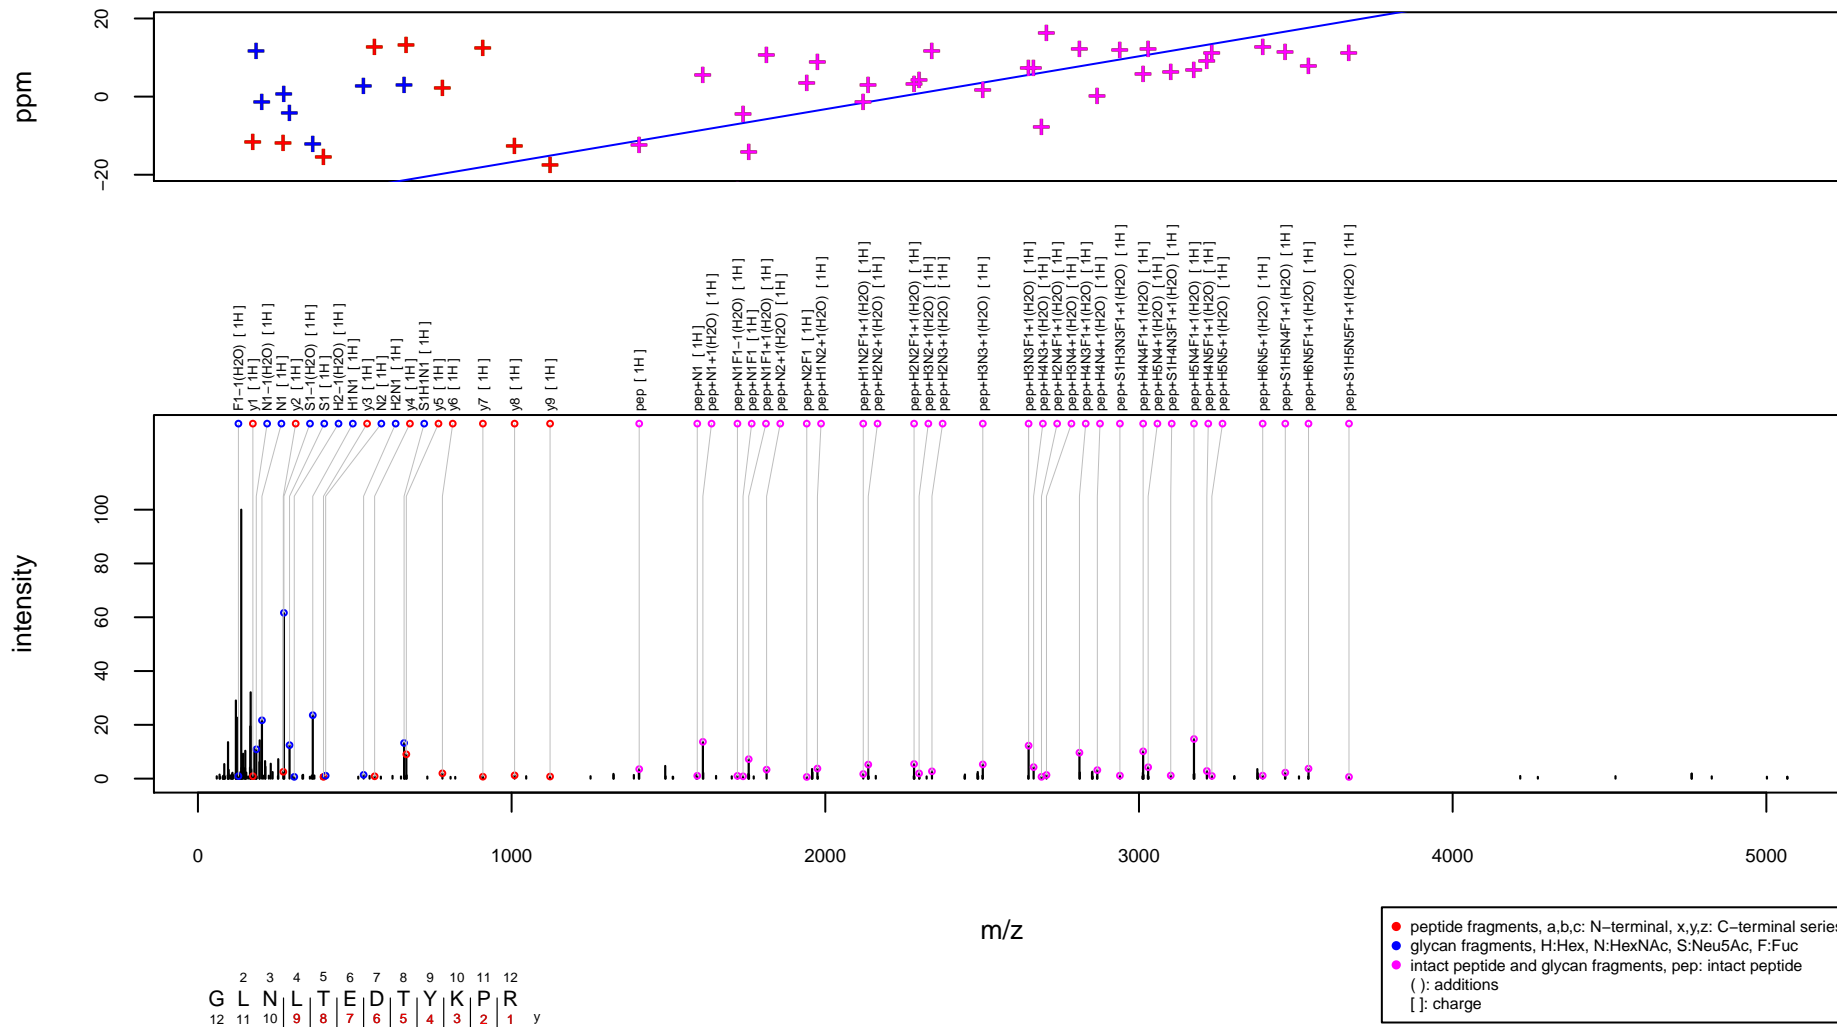



# m/z 985.5985 charge 5 scan 0-0

Score= 55.98 , Hits= 43 , Explained Intensity= 0.4  
 Peptide: LG3BP\_HUMAN[396,407]:GLNLTEDTYKPR  
 Glycan: SHN(SHN)H(SHN(SHN)H)HNN, S4H7N6  
 Charge: 5H

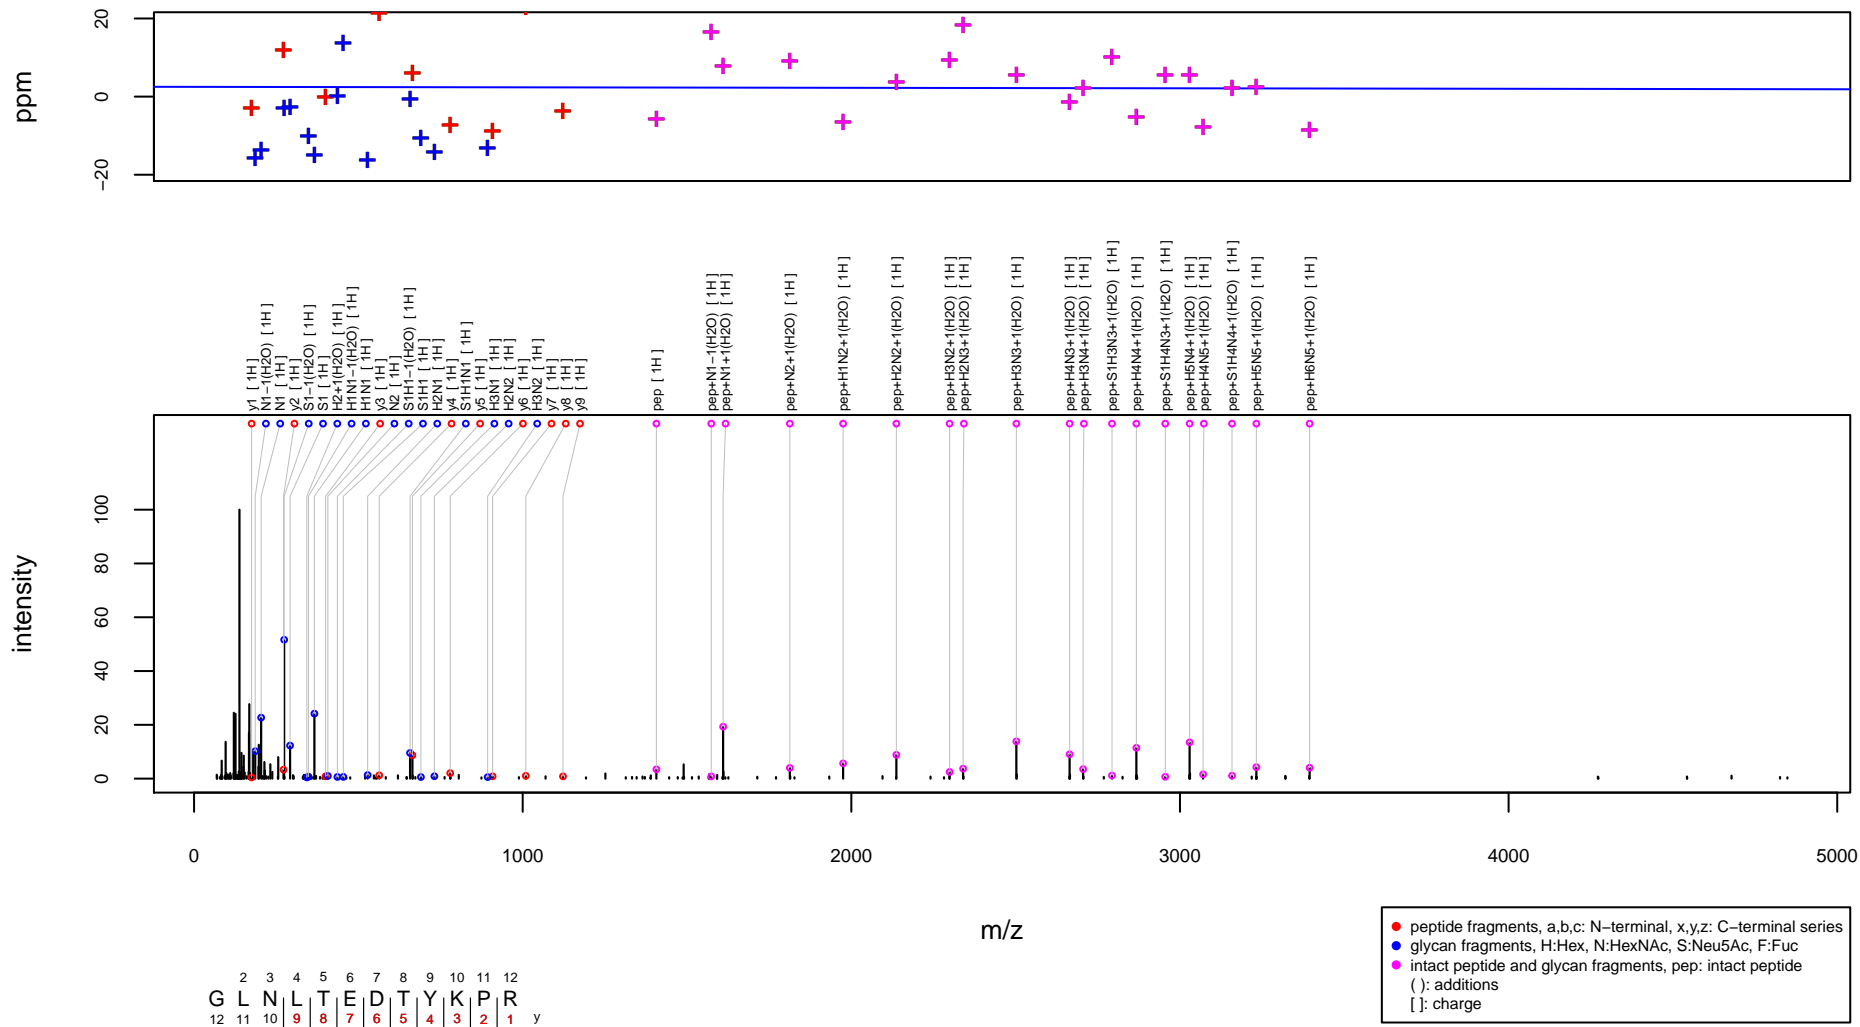

# m/z 921.71 charge 3 scan 0-0

Score= 46.11 , Hits= 29 , Explained Intensity= 0.27

Peptide: RGS16\_HUMAN[54,63]:NFSEDVLGWR

Glycan: HHH(H(H)H)HNN, H7N2

Charge: 3H

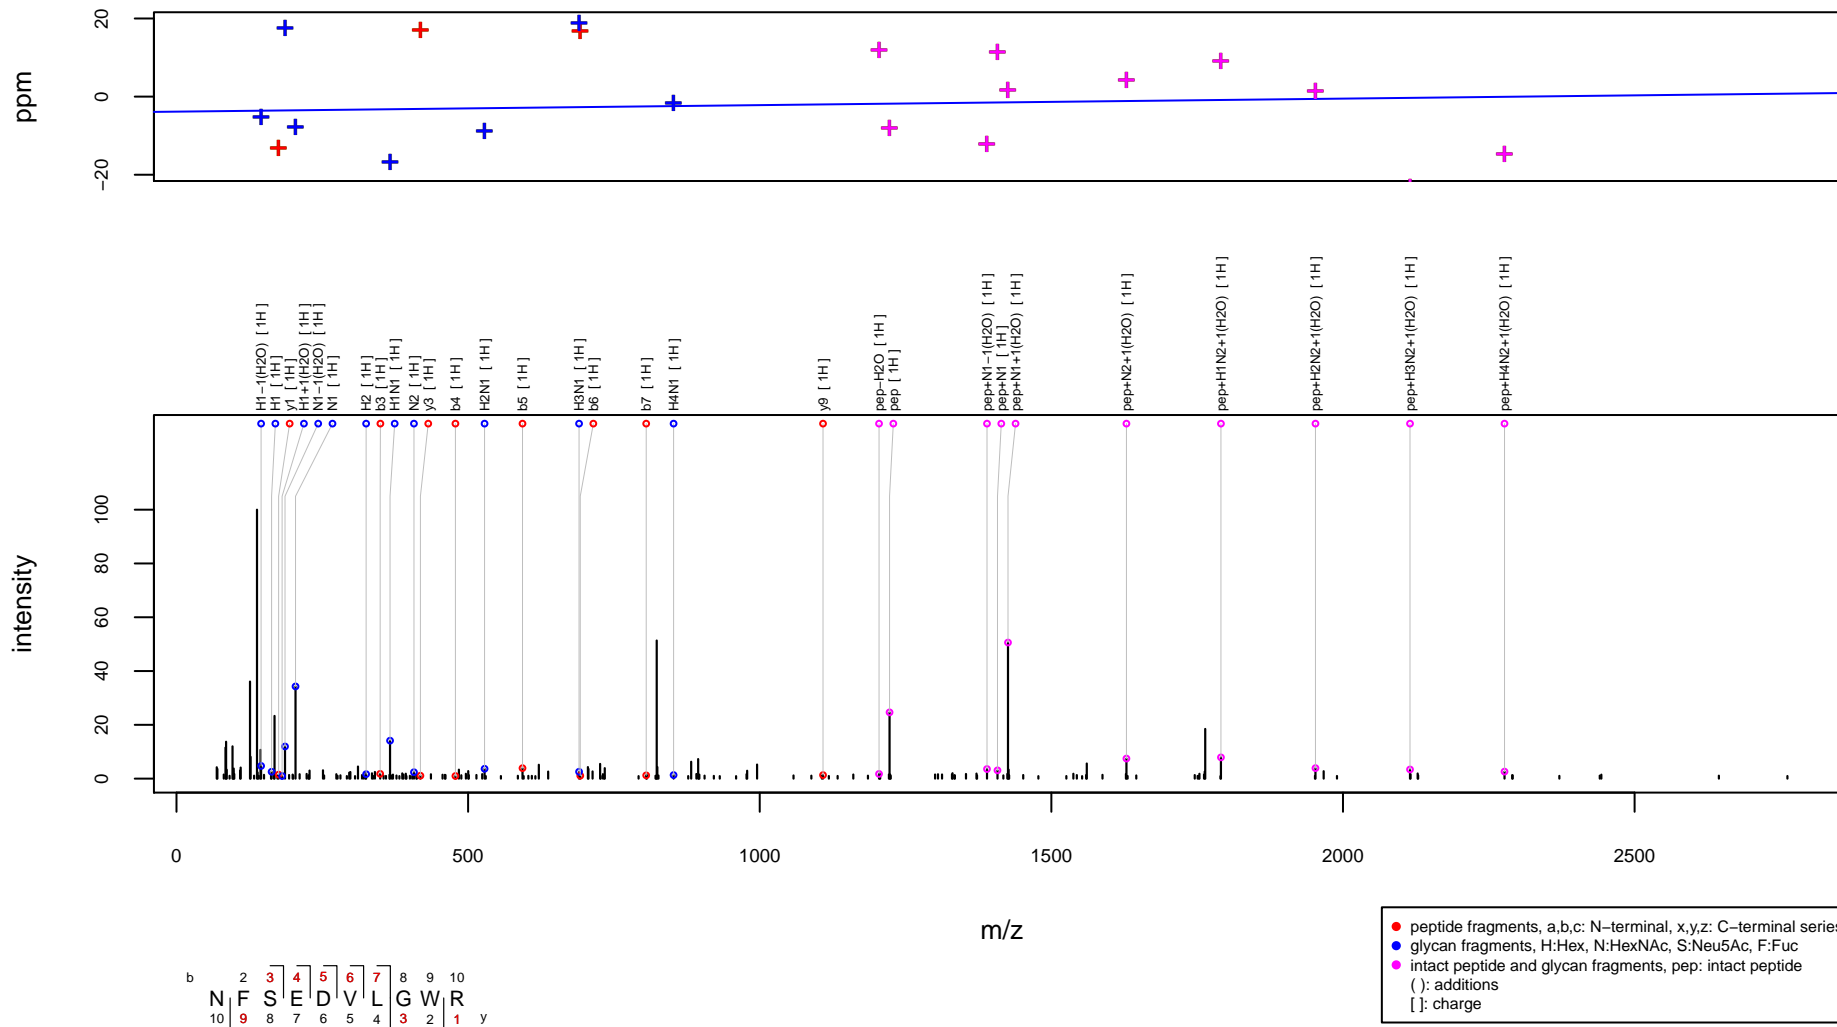

# m/z 1065.4534 charge 3 scan 0-0

Score= 37.99 , Hits= 30 , Explained Intensity= 0.26

Peptide: LYAG\_HUMAN[465,479]:GVFITNETGQPLIGK

Glycan: S2H3N2F1

Charge: 3H

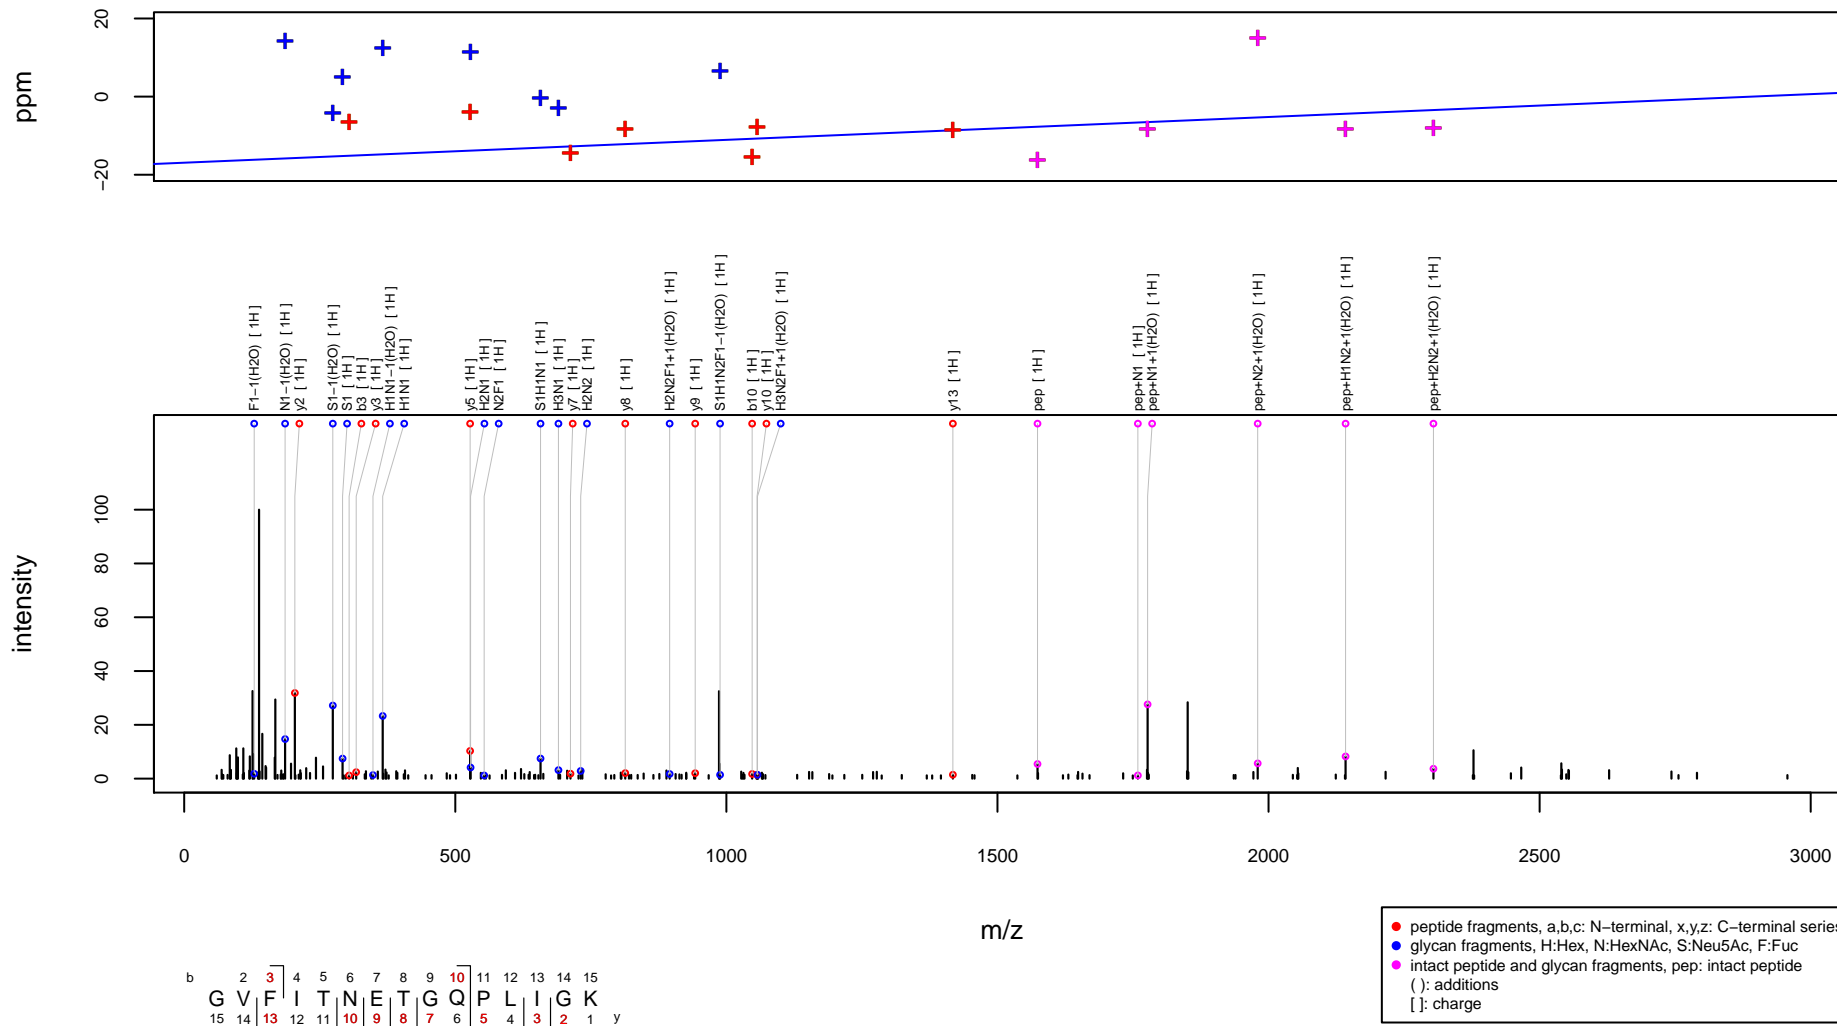

# m/z 1103.789 charge 3 scan 0-0

Score= 70.6 , Hits= 45 , Explained Intensity= 0.51  
 Peptide: CO4A\_HUMAN[1326,1336]:GLNVTLSSSTGR  
 Glycan: SHNH(SHNH)HNN, S2H5N4  
 Charge: 3H

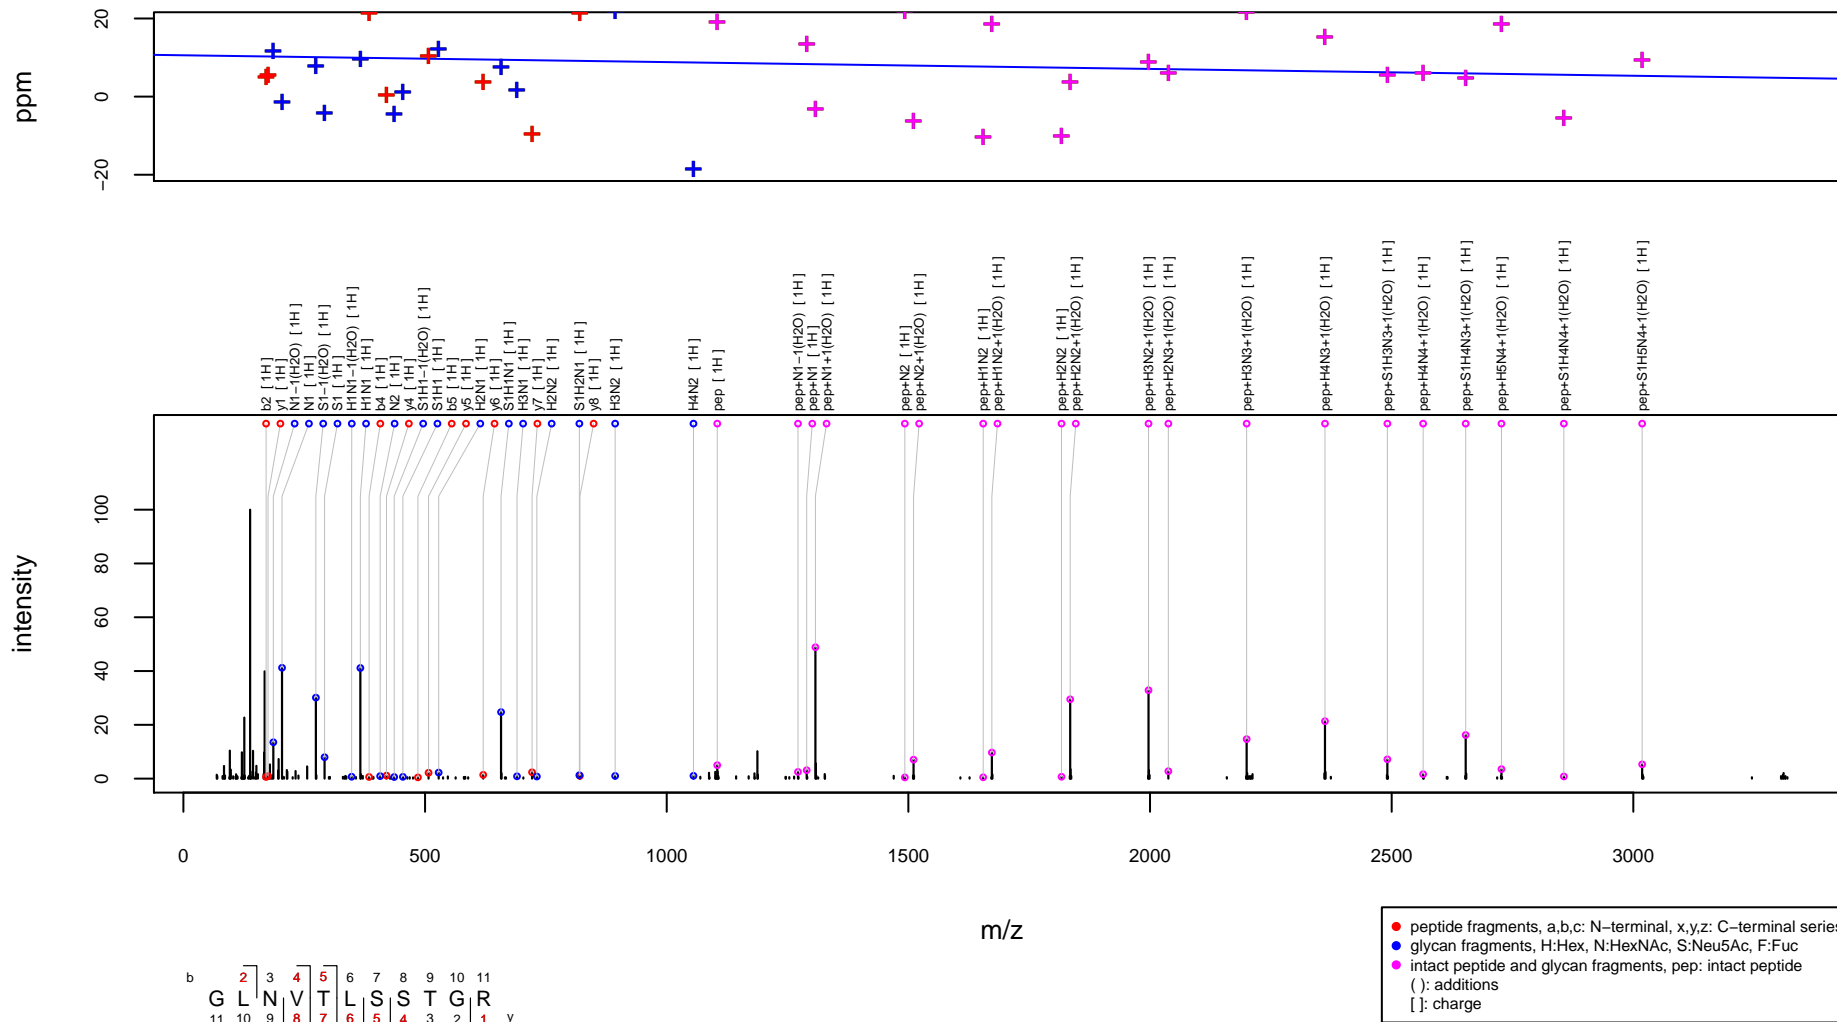

# m/z 927.0483 charge 3 scan 0-0

Score= 23.27 , Hits= 18 , Explained Intensity= 0.11

Peptide: AMN1\_HUMAN[90,96]:LNLNASK

Glycan: H6N3F3

Charge: 3H

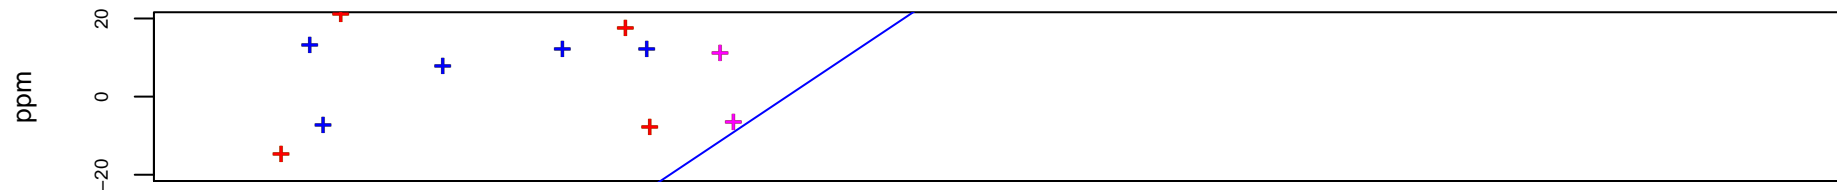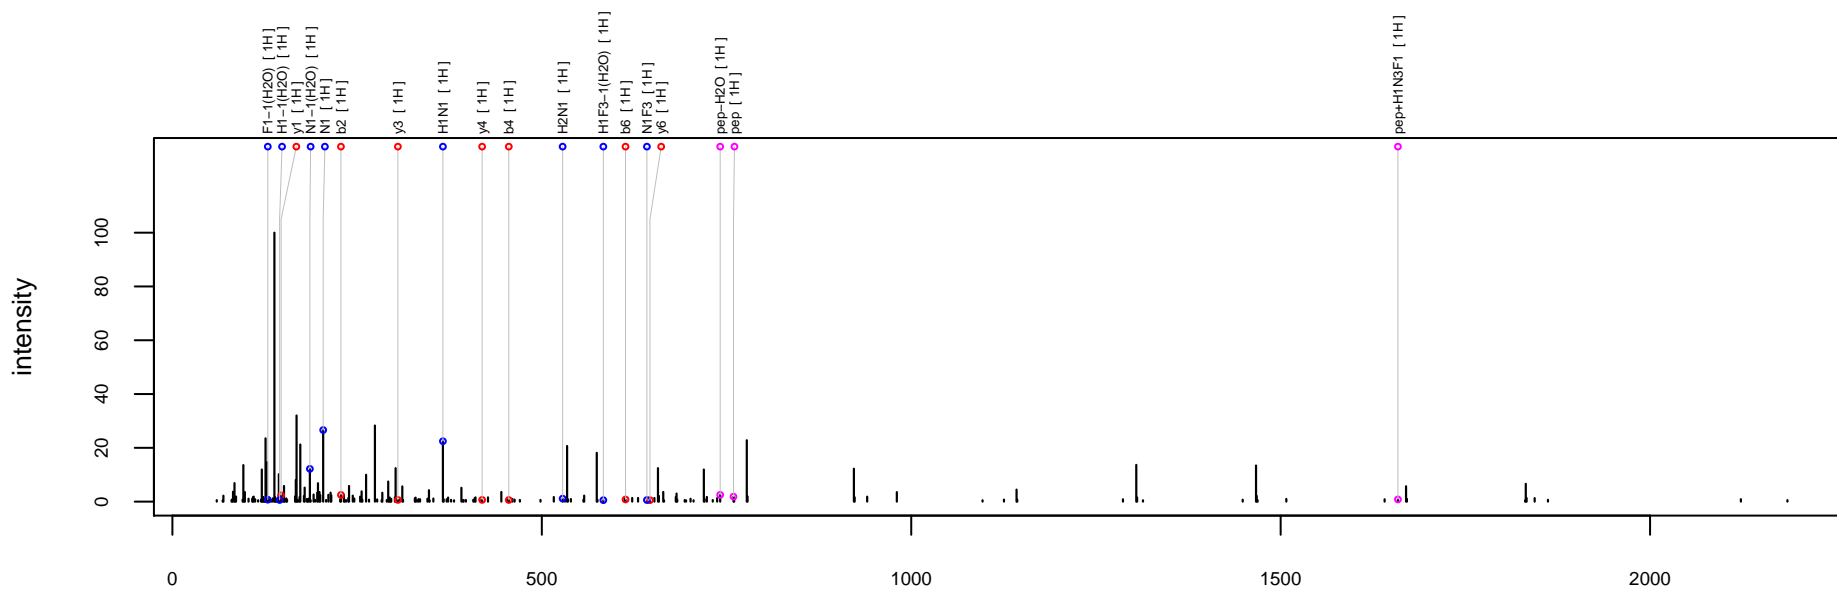

b

|   |   |   |   |   |   |   |
|---|---|---|---|---|---|---|
|   | 2 | 3 | 4 | 5 | 6 | 7 |
| L | N | L | N | A | S | K |
| 7 | 6 | 5 | 4 | 3 | 2 | 1 |

y

- peptide fragments, a,b,c: N-terminal, x,y,z: C-terminal series
- glycan fragments, H:Hex, N:HexNAc, S:Neu5Ac, F:Fuc
- intact peptide and glycan fragments, pep: intact peptide
- ( ): additions
- [ ]: charge

# m/z 1145.1309 charge 3 scan 0-0

Score= 81.23 , Hits= 51 , Explained Intensity= 0.59

Peptide: IGJ\_HUMAN[70,80]:ENISDPTSPLR

Glycan: SHNH(SHNH)HNN, S2H5N4

Charge: 3H

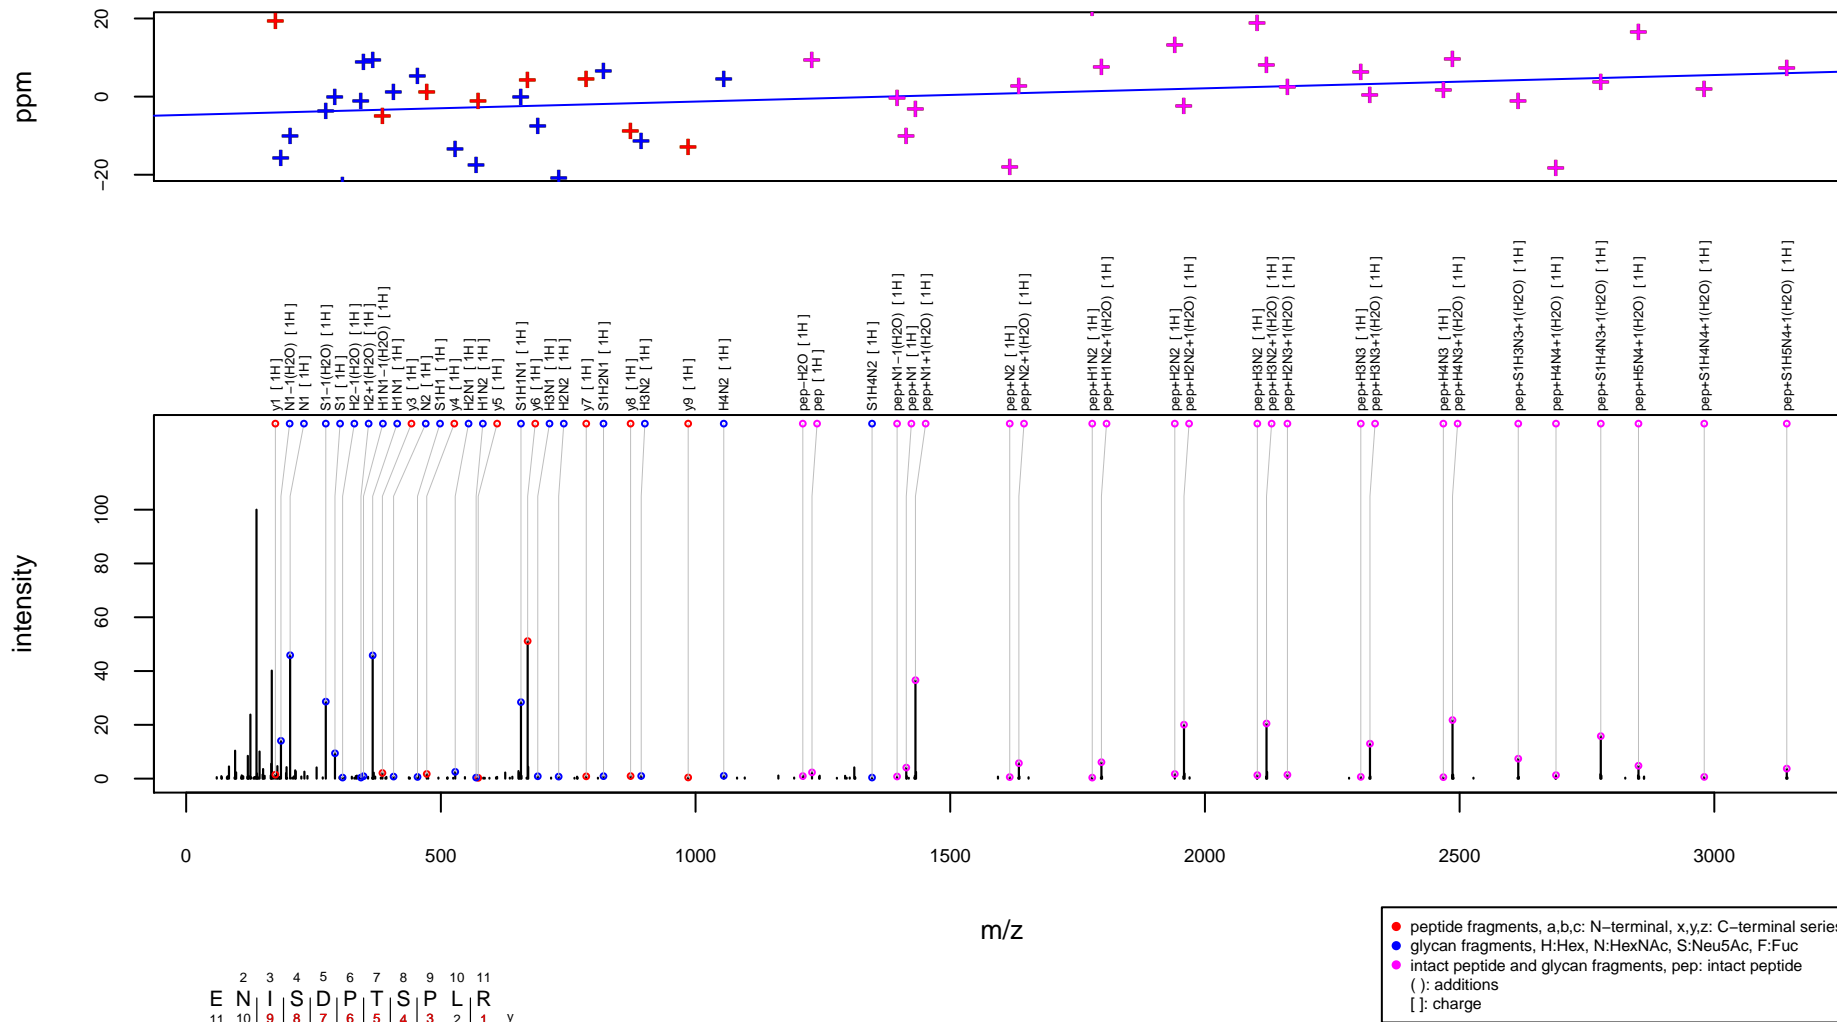

# m/z 1053.11 charge 3 scan 0-0

Score= 77.47 , Hits= 53 , Explained Intensity= 0.48  
 Peptide: CUBN\_HUMAN[778,788]:VCGNGTISHIK  
 Glycan: HNH(HNH)(N)HN(F)N, H5N5F1  
 Charge: 3H

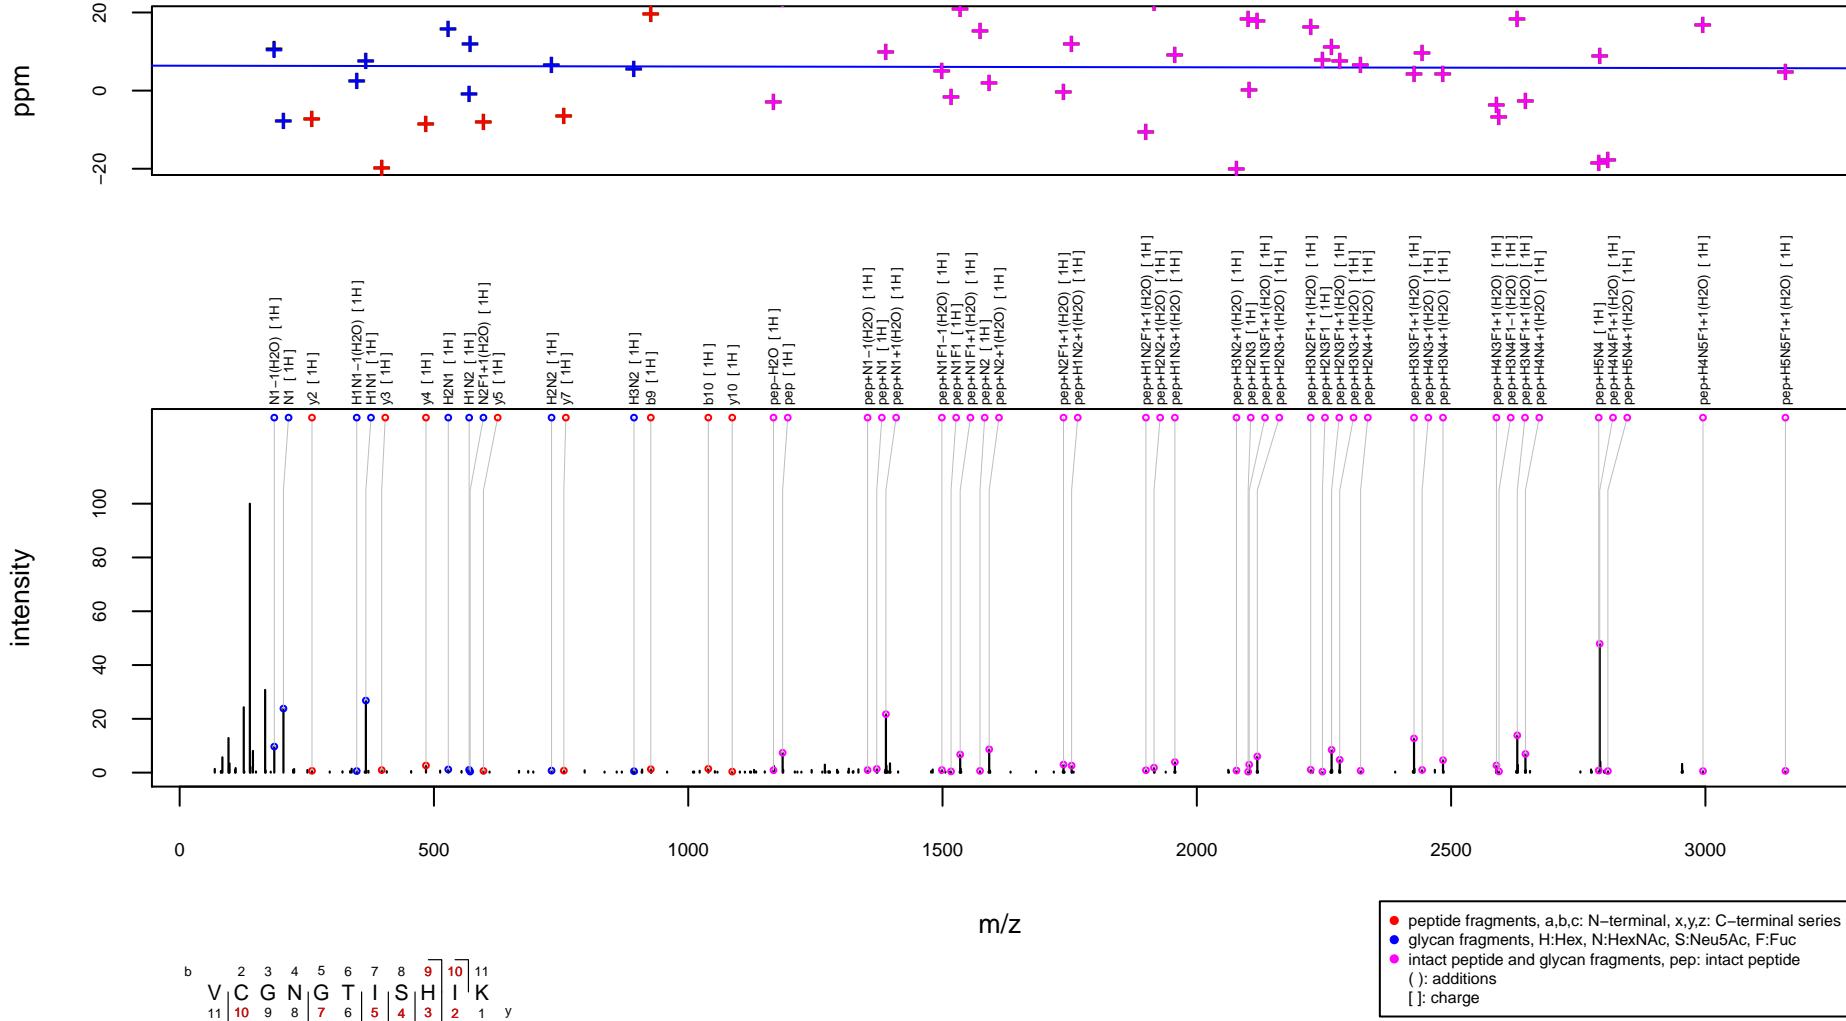

# m/z 1029.0918 charge 3 scan 0-0

Score= 65.06 , Hits= 52 , Explained Intensity= 0.5

Peptide: IGJ\_HUMAN[70,80]:ENISDPTSPLR

Glycan: S1H5N3F1

Charge: 3H

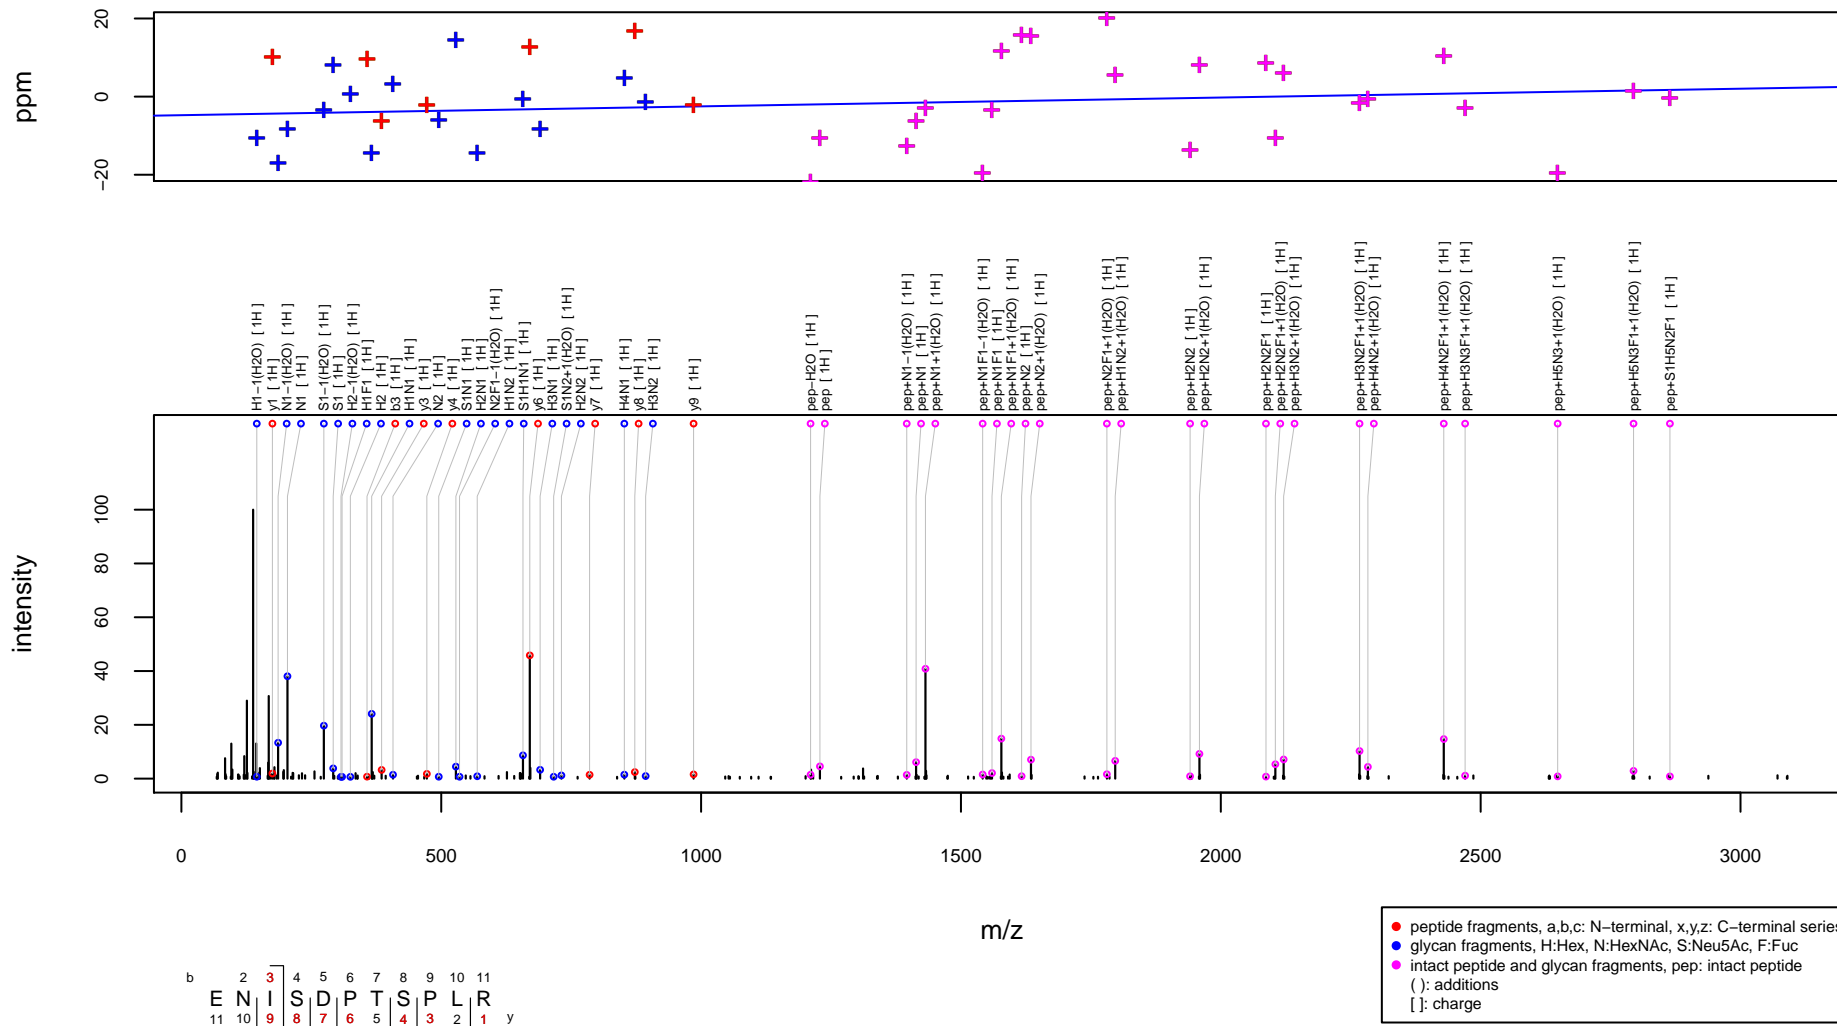



# m/z 1326.8784 charge 3 scan 0-0

Score= 63.16 , Hits= 61 , Explained Intensity= 0.49

Peptide: CUBN\_HUMAN[2526,2537]:LCSSVNVSEIK

Glycan: H6N6F3

Charge: 3H

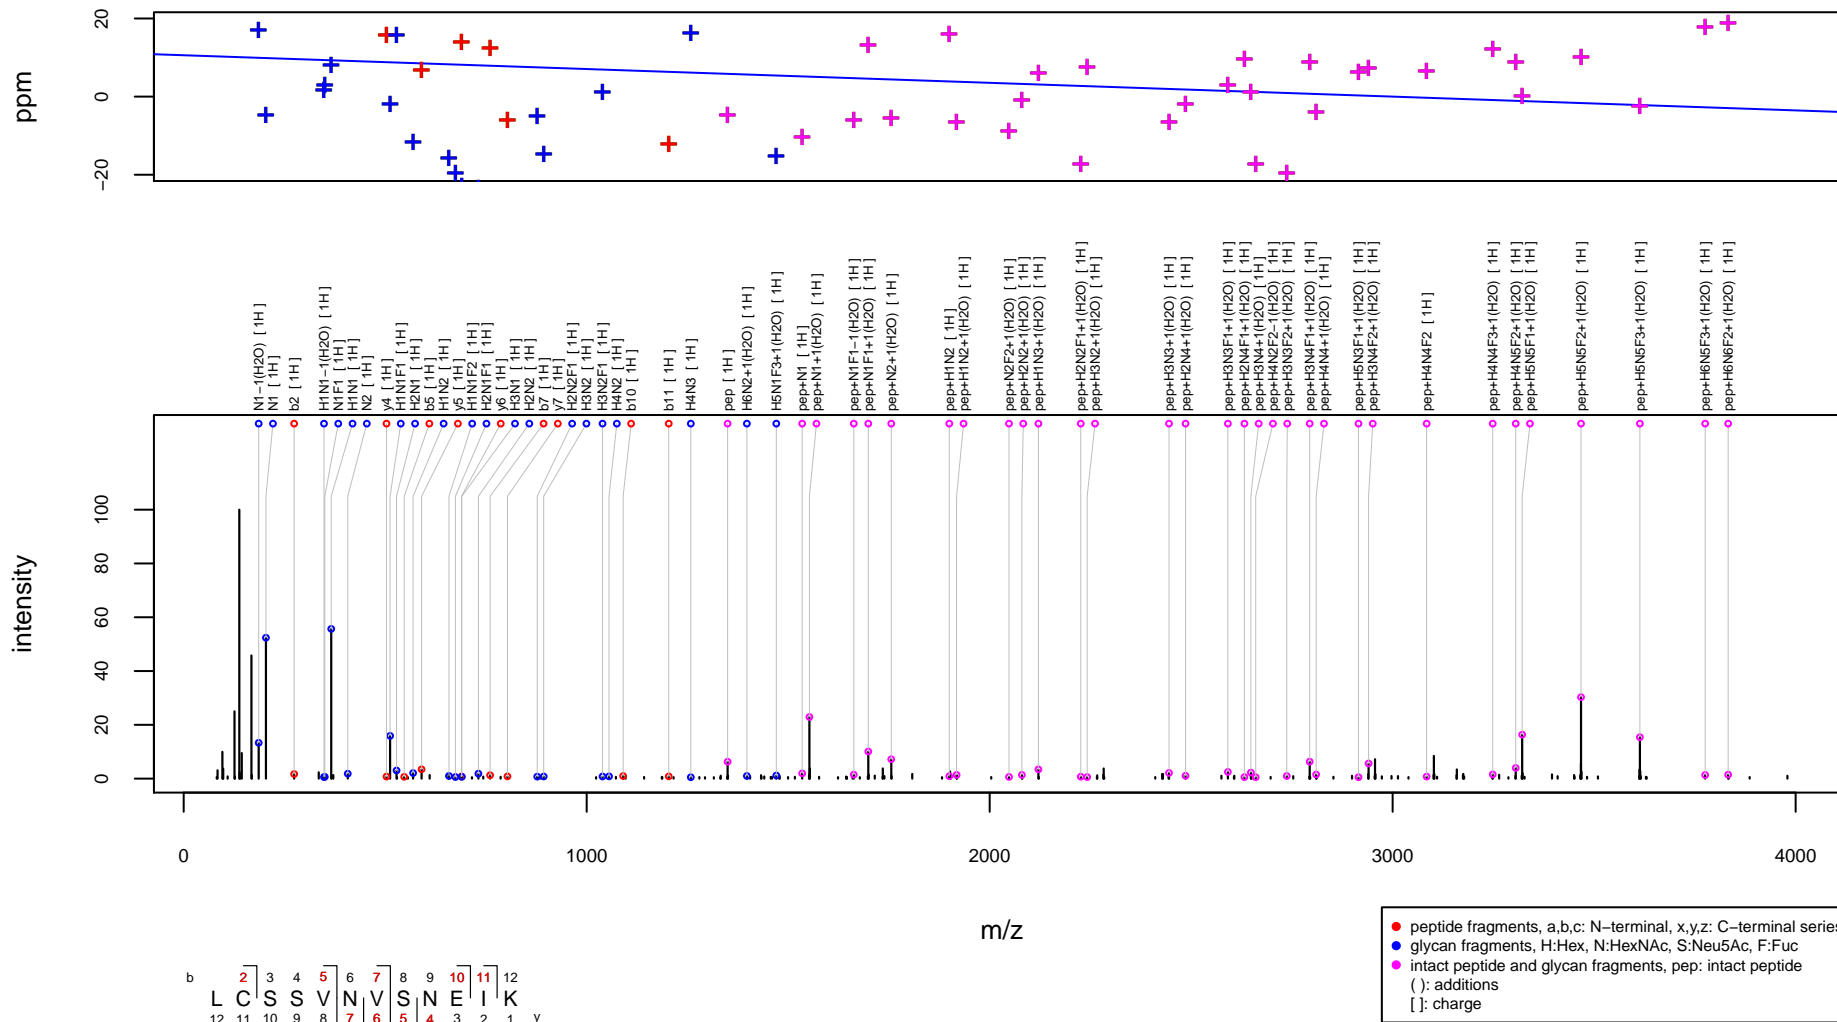

# m/z 1331.293 charge 4 scan 0-0

Score= 66.81 , Hits= 52 , Explained Intensity= 0.46

Peptide: UROM\_HUMAN[499,519]:FALLMTNCYATPSSNATDPLK

Glycan: SHNH(SHN(SHN)H)HN(F)N, S3H6N5F1

Charge: 4H

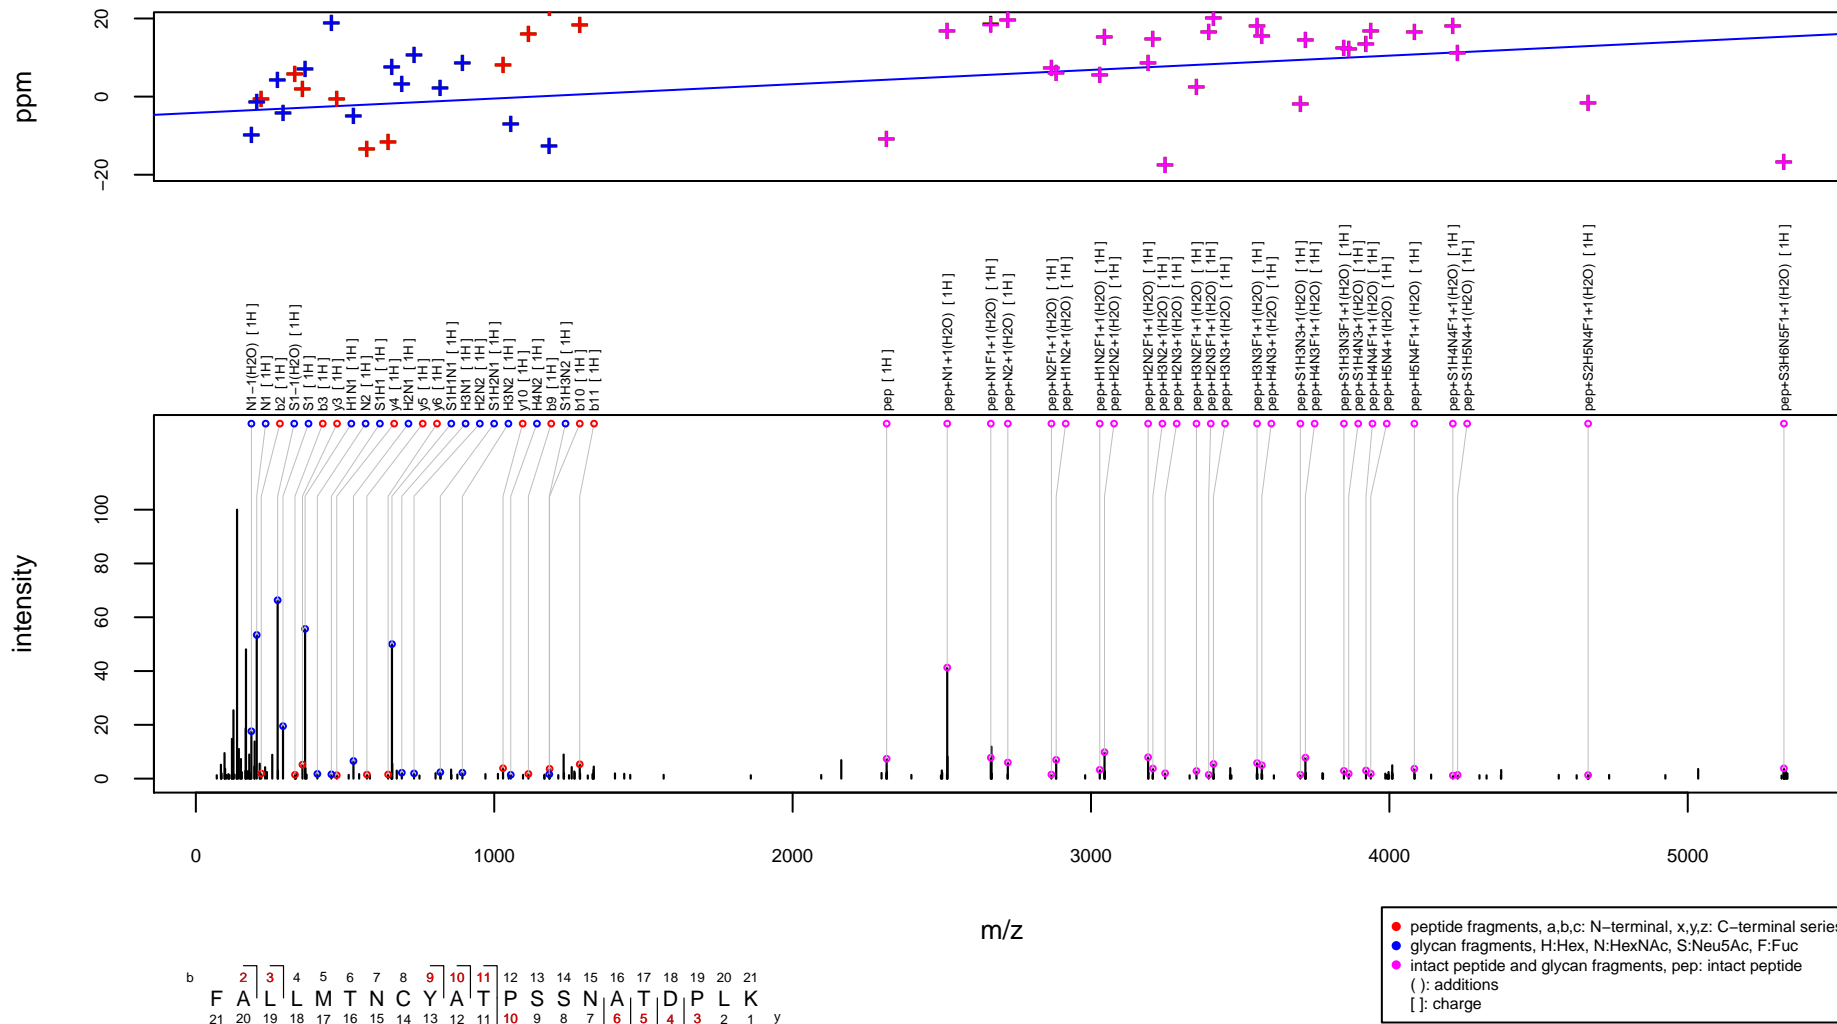

# m/z 1133.6877 charge 4 scan 0-0

Score= 54.56 , Hits= 42 , Explained Intensity= 0.32

Peptide: LRP2\_HUMAN[2797,2815]:EFICNGVDNCHDNNTSDEK

Glycan: FHNH(FHNH)(N)HN(F)N, H5N5F3

Charge: 4H

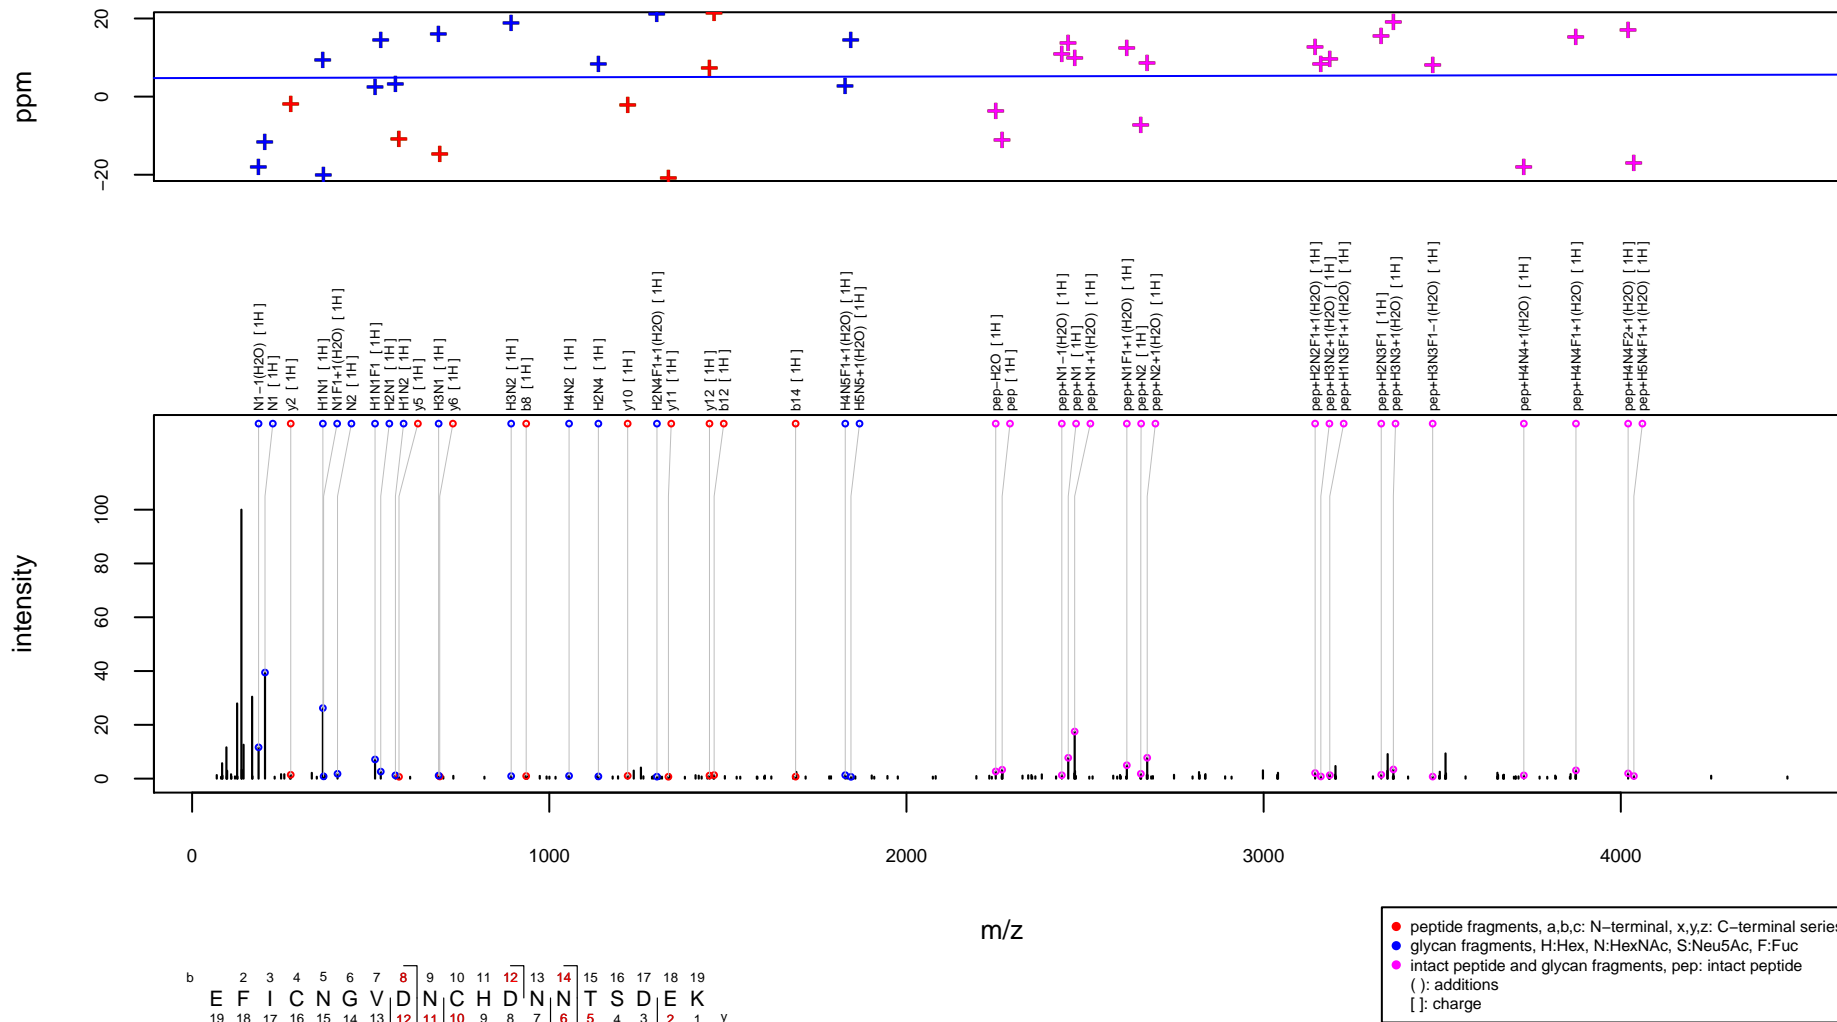

# m/z 980.4081 charge 3 scan 0-0

Score= 51.85 , Hits= 34 , Explained Intensity= 0.47

Peptide: IGJ\_HUMAN[70,80]:ENISDPTSPLR

Glycan: SHNH(HH)HNN, S1H5N3

Charge: 3H

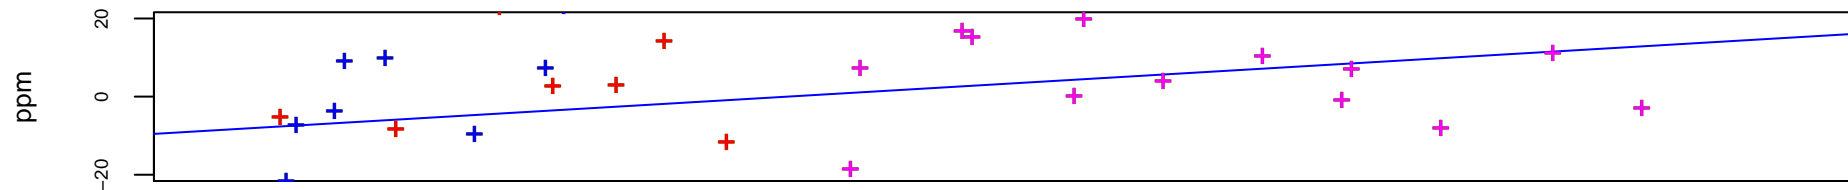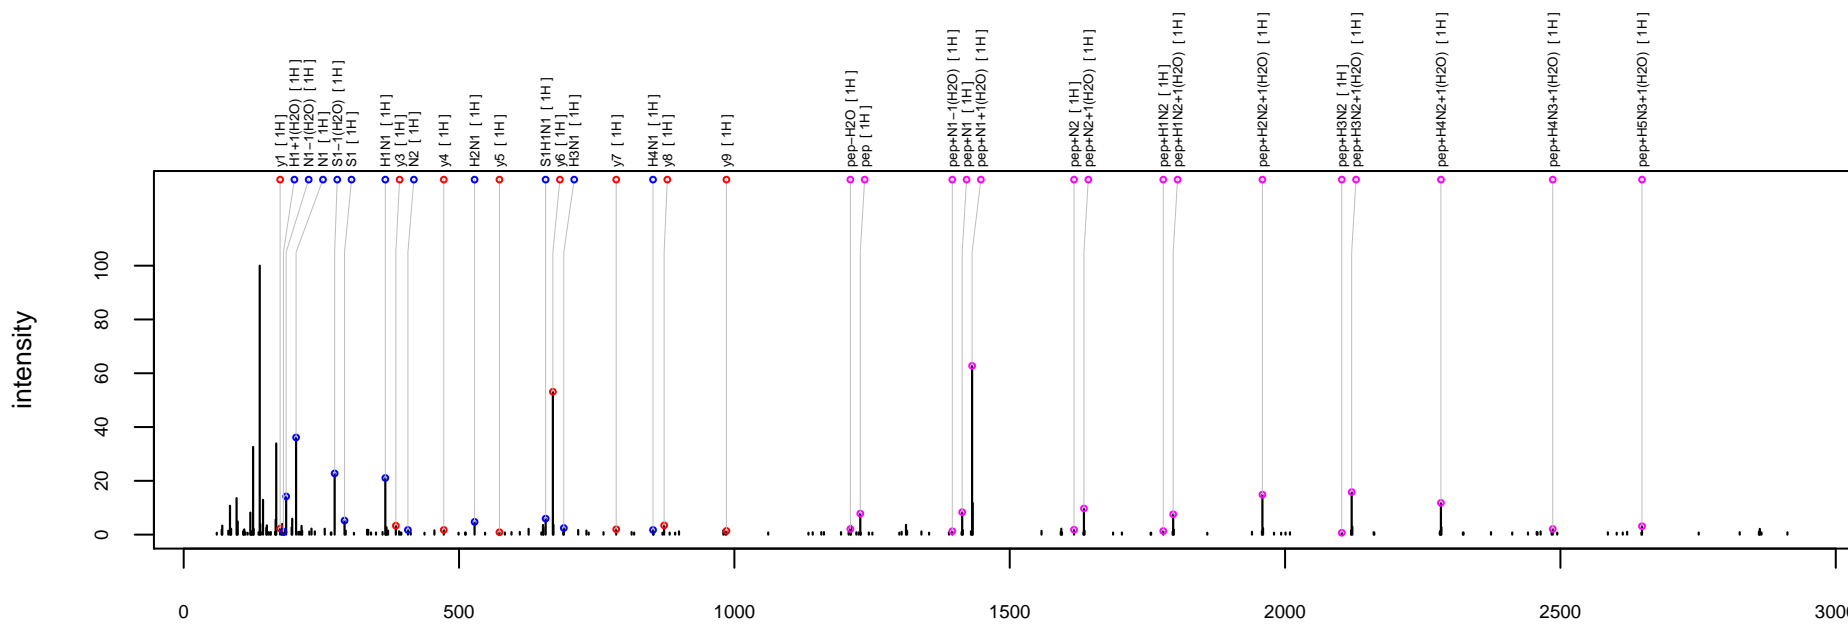

|    |    |   |   |   |   |   |   |   |    |    |
|----|----|---|---|---|---|---|---|---|----|----|
|    | 2  | 3 | 4 | 5 | 6 | 7 | 8 | 9 | 10 | 11 |
| E  | N  | I | S | D | P | T | S | P | L  | R  |
| 11 | 10 | 9 | 8 | 7 | 6 | 5 | 4 | 3 | 2  | 1  |

y

- peptide fragments, a,b,c: N-terminal, x,y,z: C-terminal series
- glycan fragments, H:Hex, N:HexNAc, S:Neu5Ac, F:Fuc
- intact peptide and glycan fragments, pep: intact peptide
- ( ): additions
- [ ]: charge

# m/z 1125.954 charge 4 scan 0-0

Score= 48.17 , Hits= 49 , Explained Intensity= 0.42  
 Peptide: LG3BP\_HUMAN[542,554]:AAIPSAALDTNSK  
 Glycan: S3H7N6  
 Charge: 4H

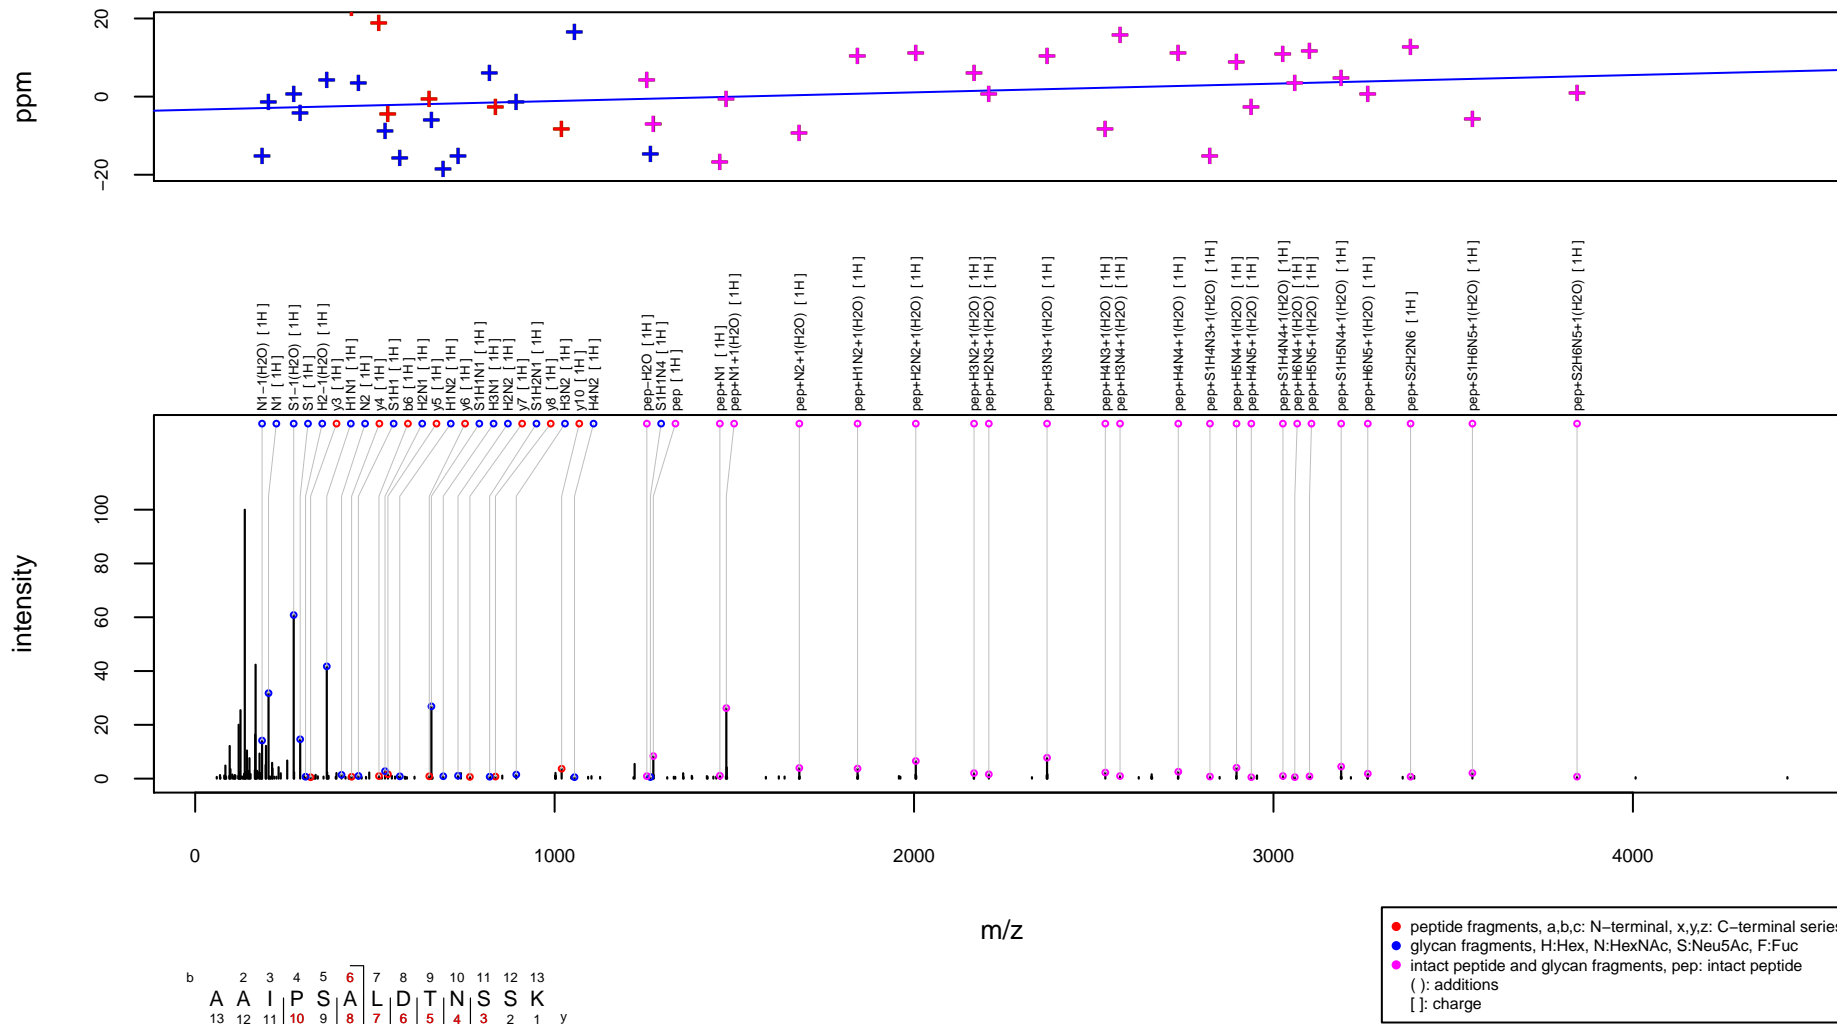

# m/z 1229.5062 charge 3 scan 0-0

Score= 64.44 , Hits= 48 , Explained Intensity= 0.43

Peptide: CUBN\_HUMAN[2526,2537]:LCSSVNVSNEIK

Glycan: HNH(HN(HN)H)(N)HN(F)N, H6N6F1

Charge: 3H

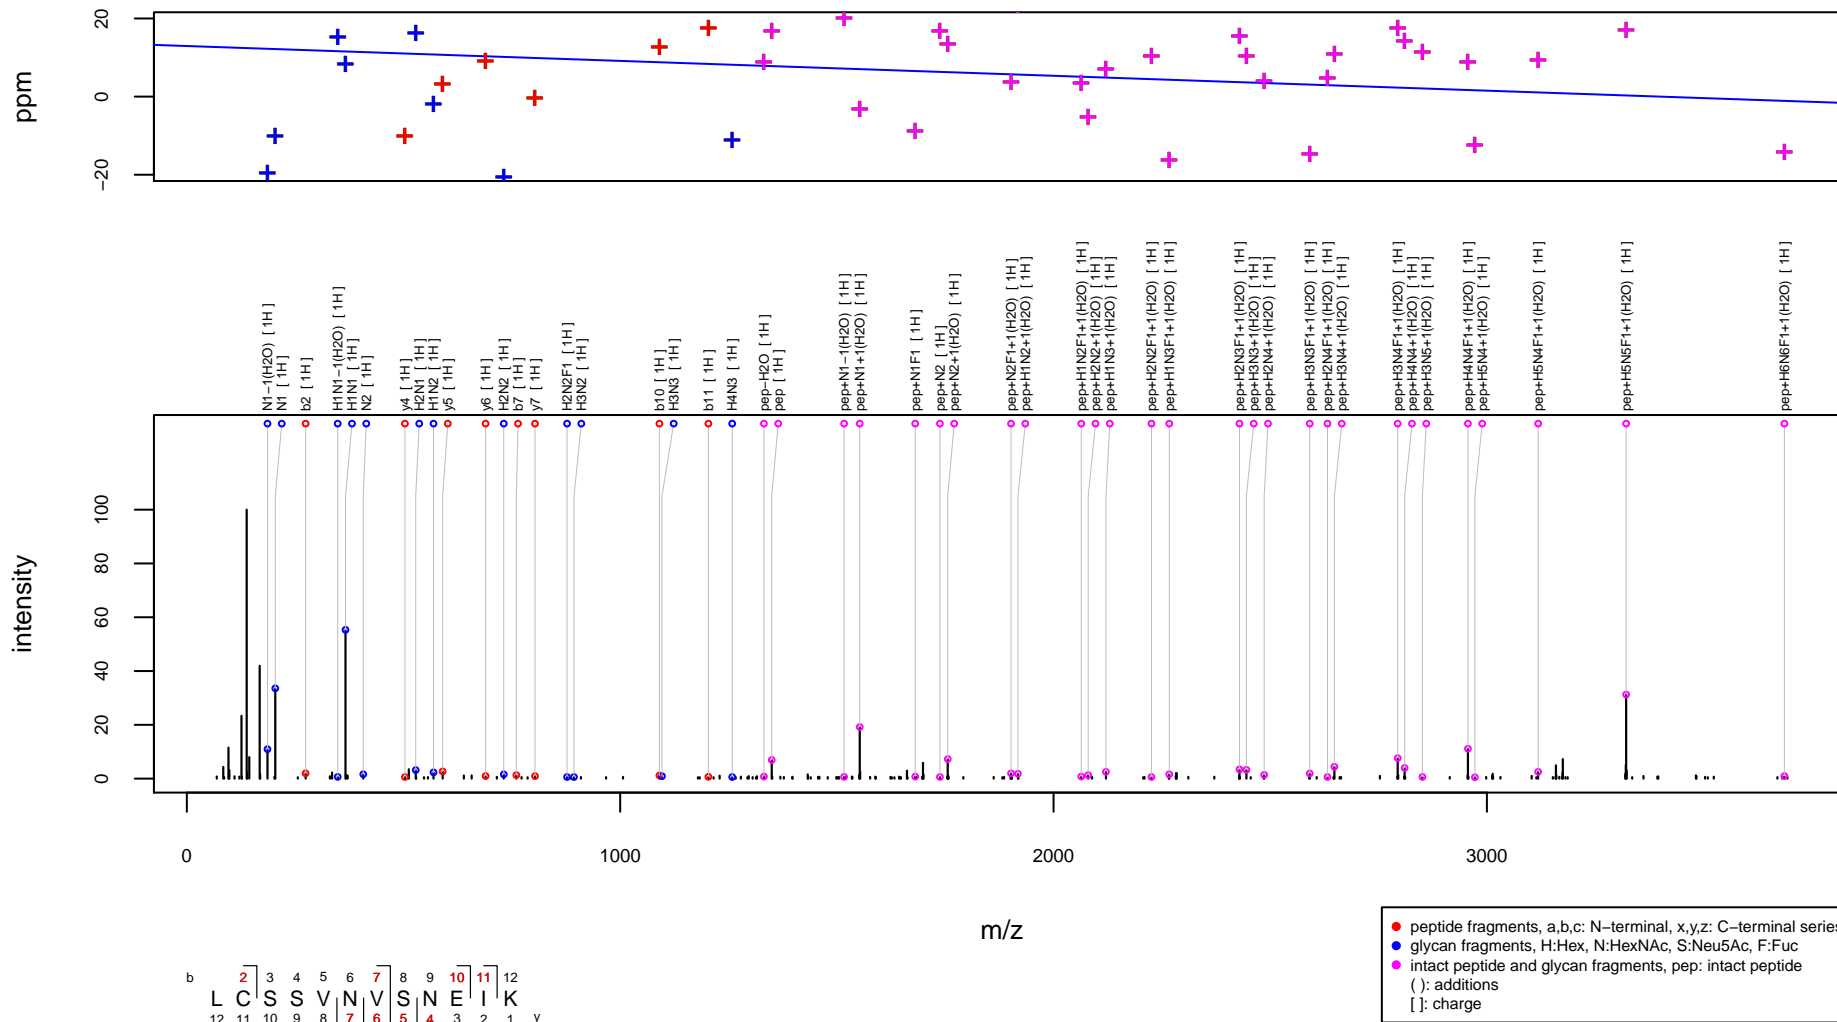

# m/z 1218.5017 charge 3 scan 0-0

Score= 54.69 , Hits= 52 , Explained Intensity= 0.43

Peptide: CUBN\_HUMAN[3457,3468]:NGSNSNSPLLGK

Glycan: S1H5N6F1

Charge: 3H

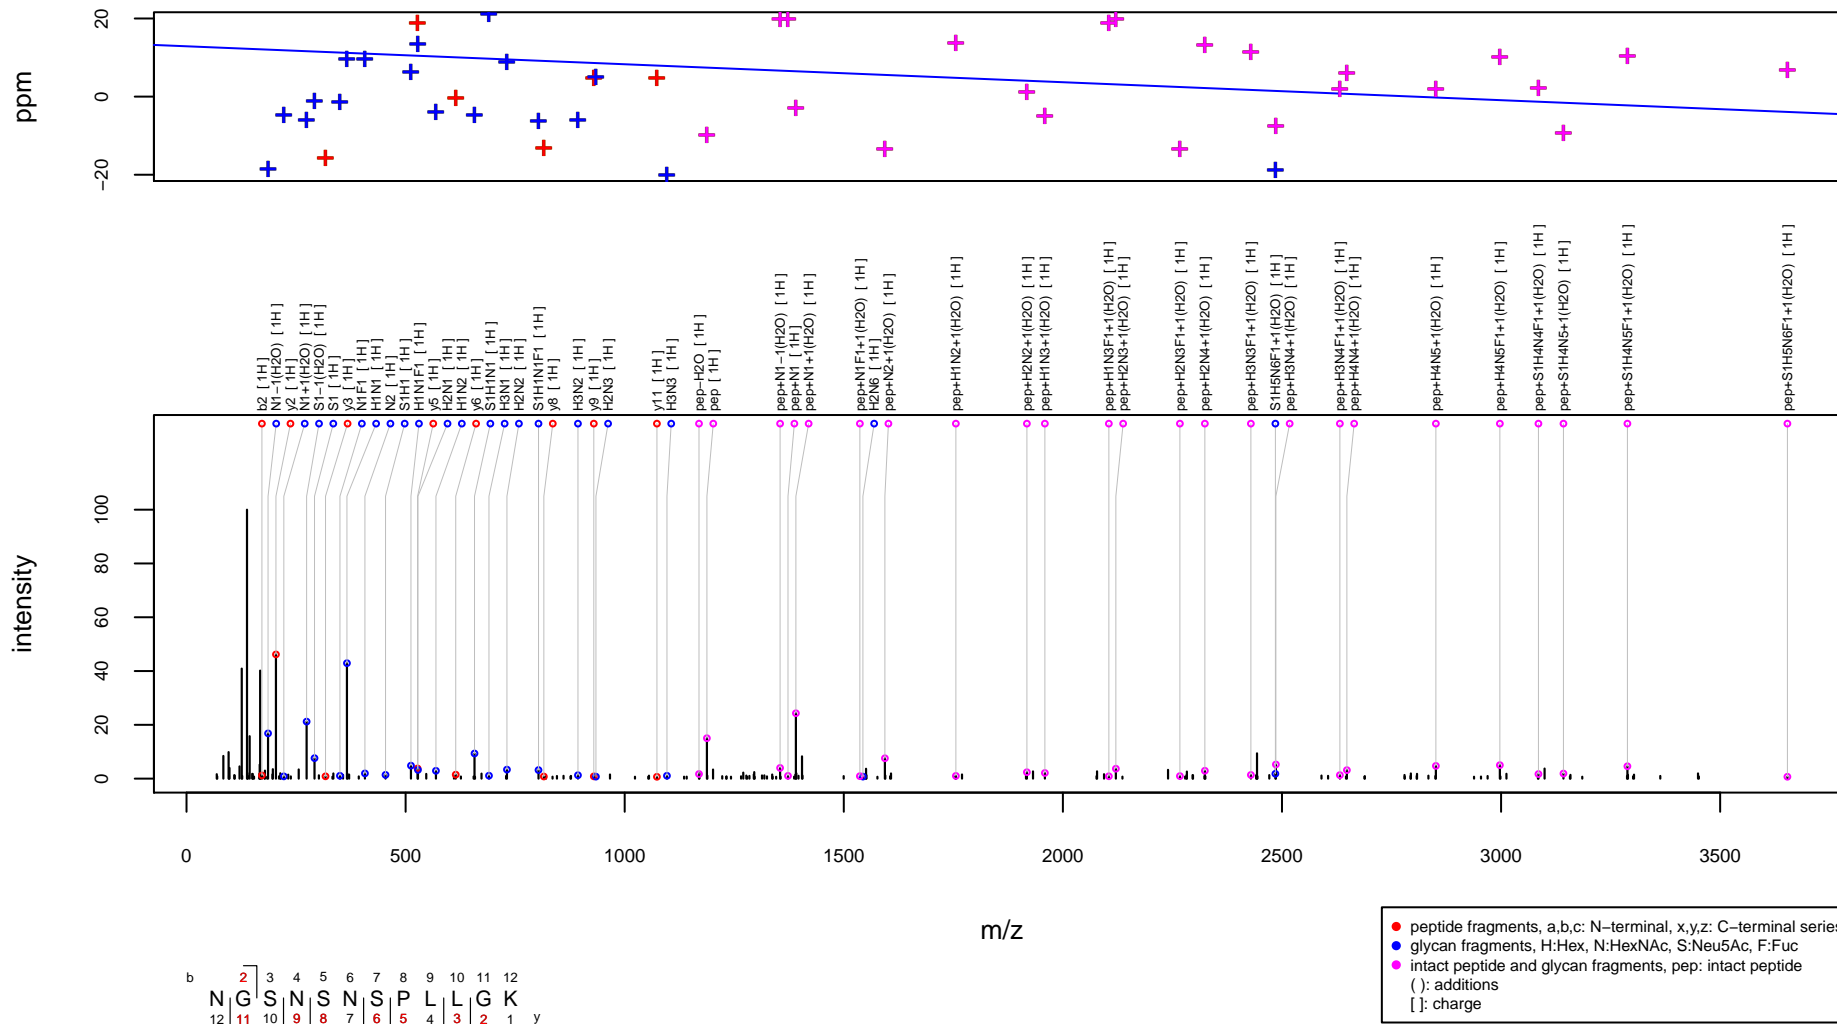

# m/z 1107.9541 charge 4 scan 0-0

Score= 40.2 , Hits= 48 , Explained Intensity= 0.4

Peptide: LG3BP\_HUMAN[64,76]:ALGFENATQALGR

Glycan: S2H7N6F1

Charge: 4H

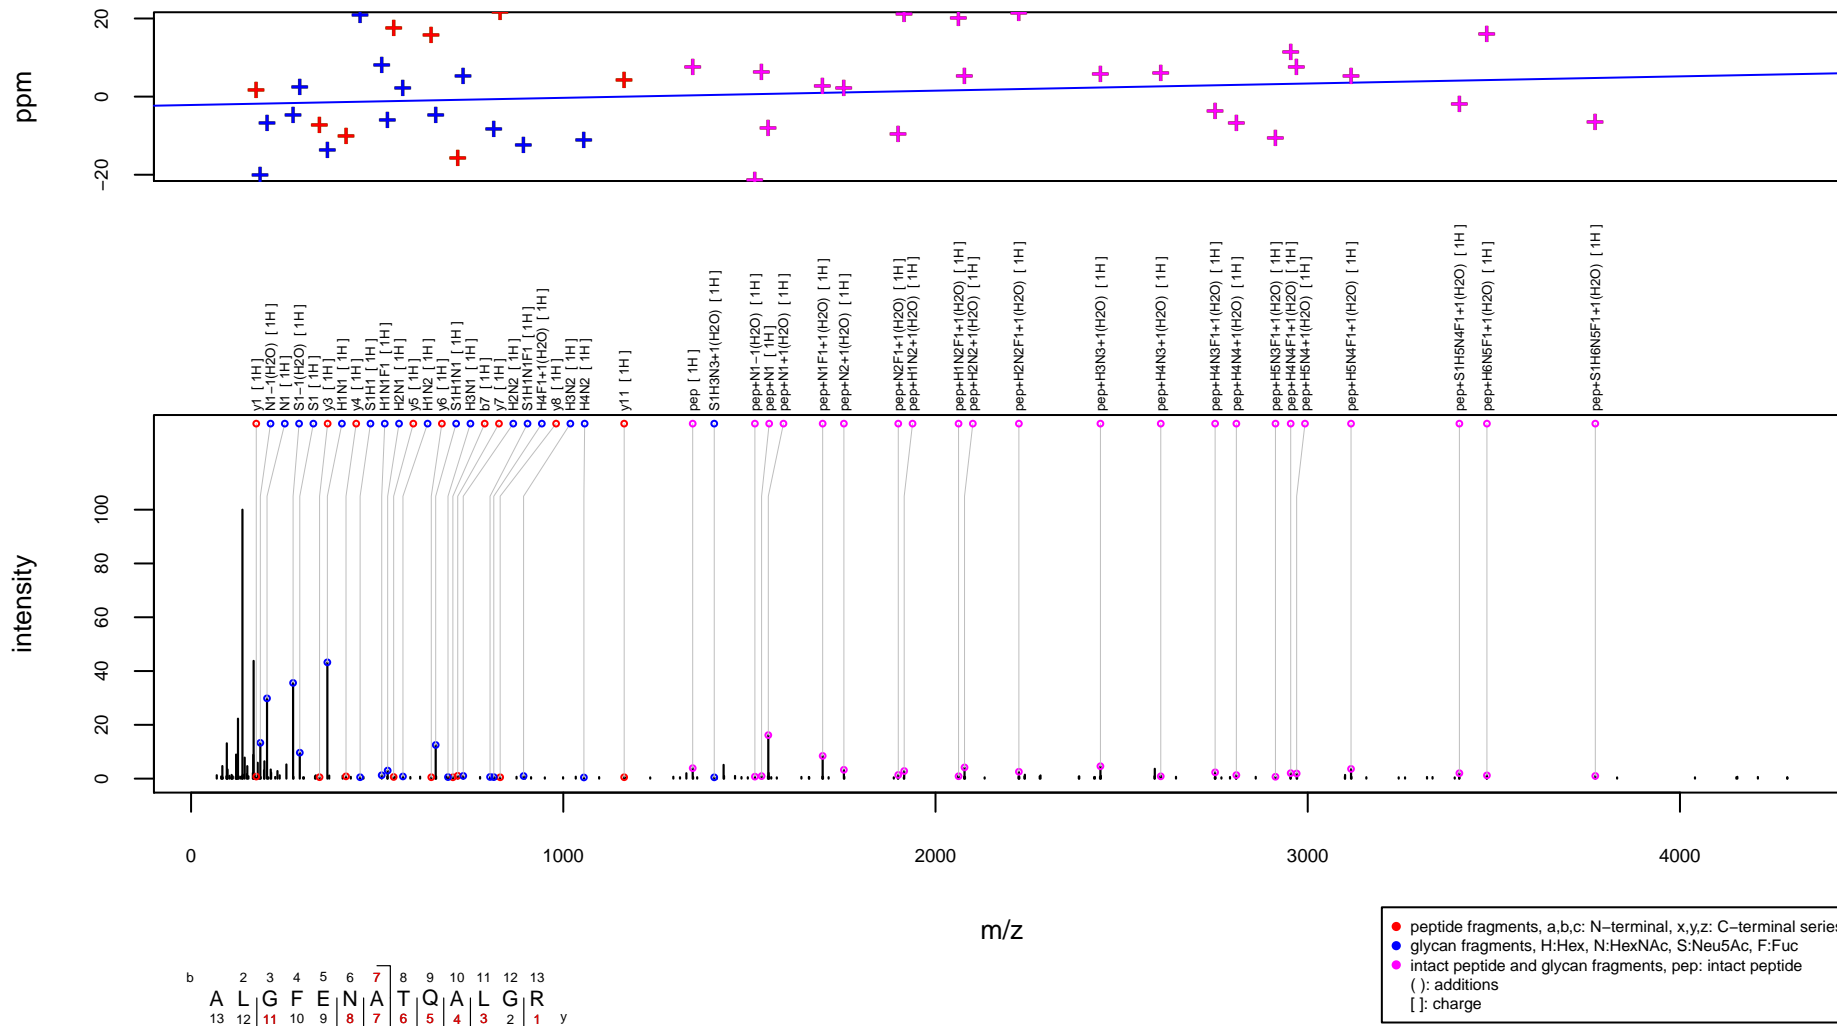



# m/z 1242.2429 charge 4 scan 0-0

Score= 55.82 , Hits= 54 , Explained Intensity= 0.48

Peptide: LRP2\_HUMAN[285,305]:VCDGILDCPGRDENNTSTGK

Glycan: H6N6F3

Charge: 4H

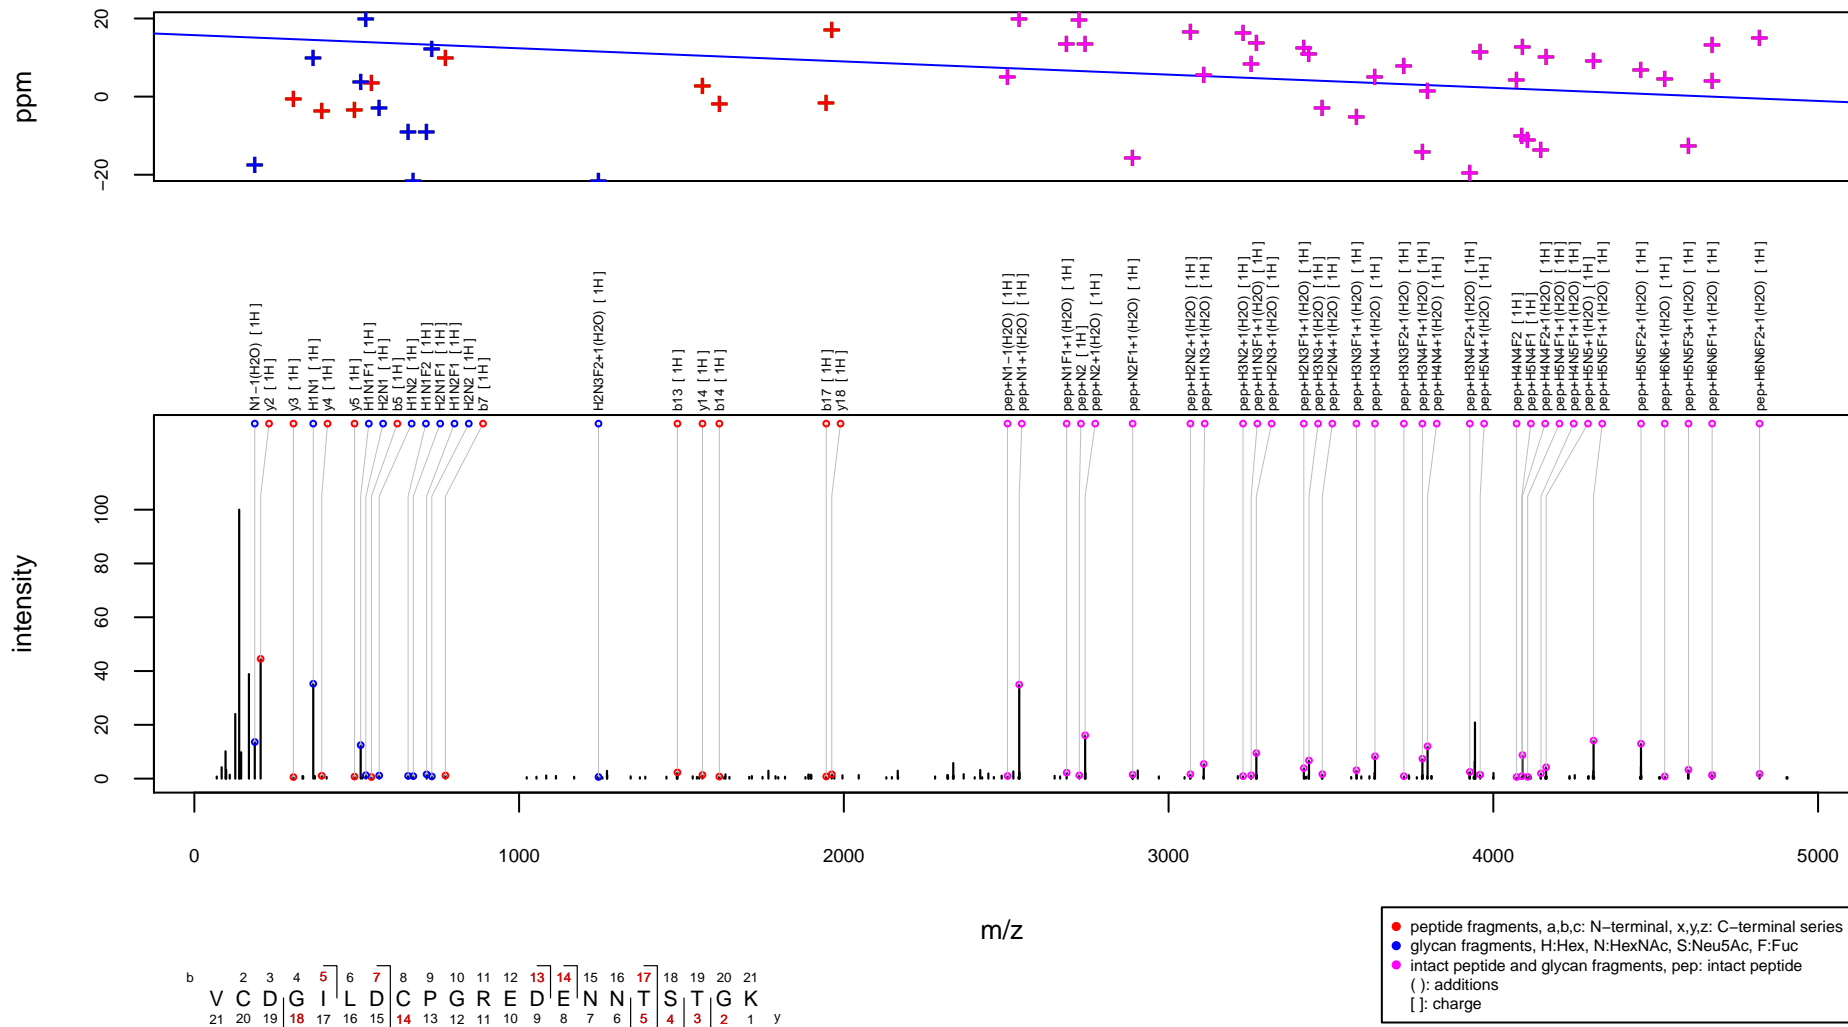

# m/z 899.8685 charge 4 scan 0-0

Score= 43.9 , Hits= 45 , Explained Intensity= 0.29

Peptide: MGA\_HUMAN[1672,1679]:NVTAYFPR

Glycan: H6N6F3

Charge: 4H

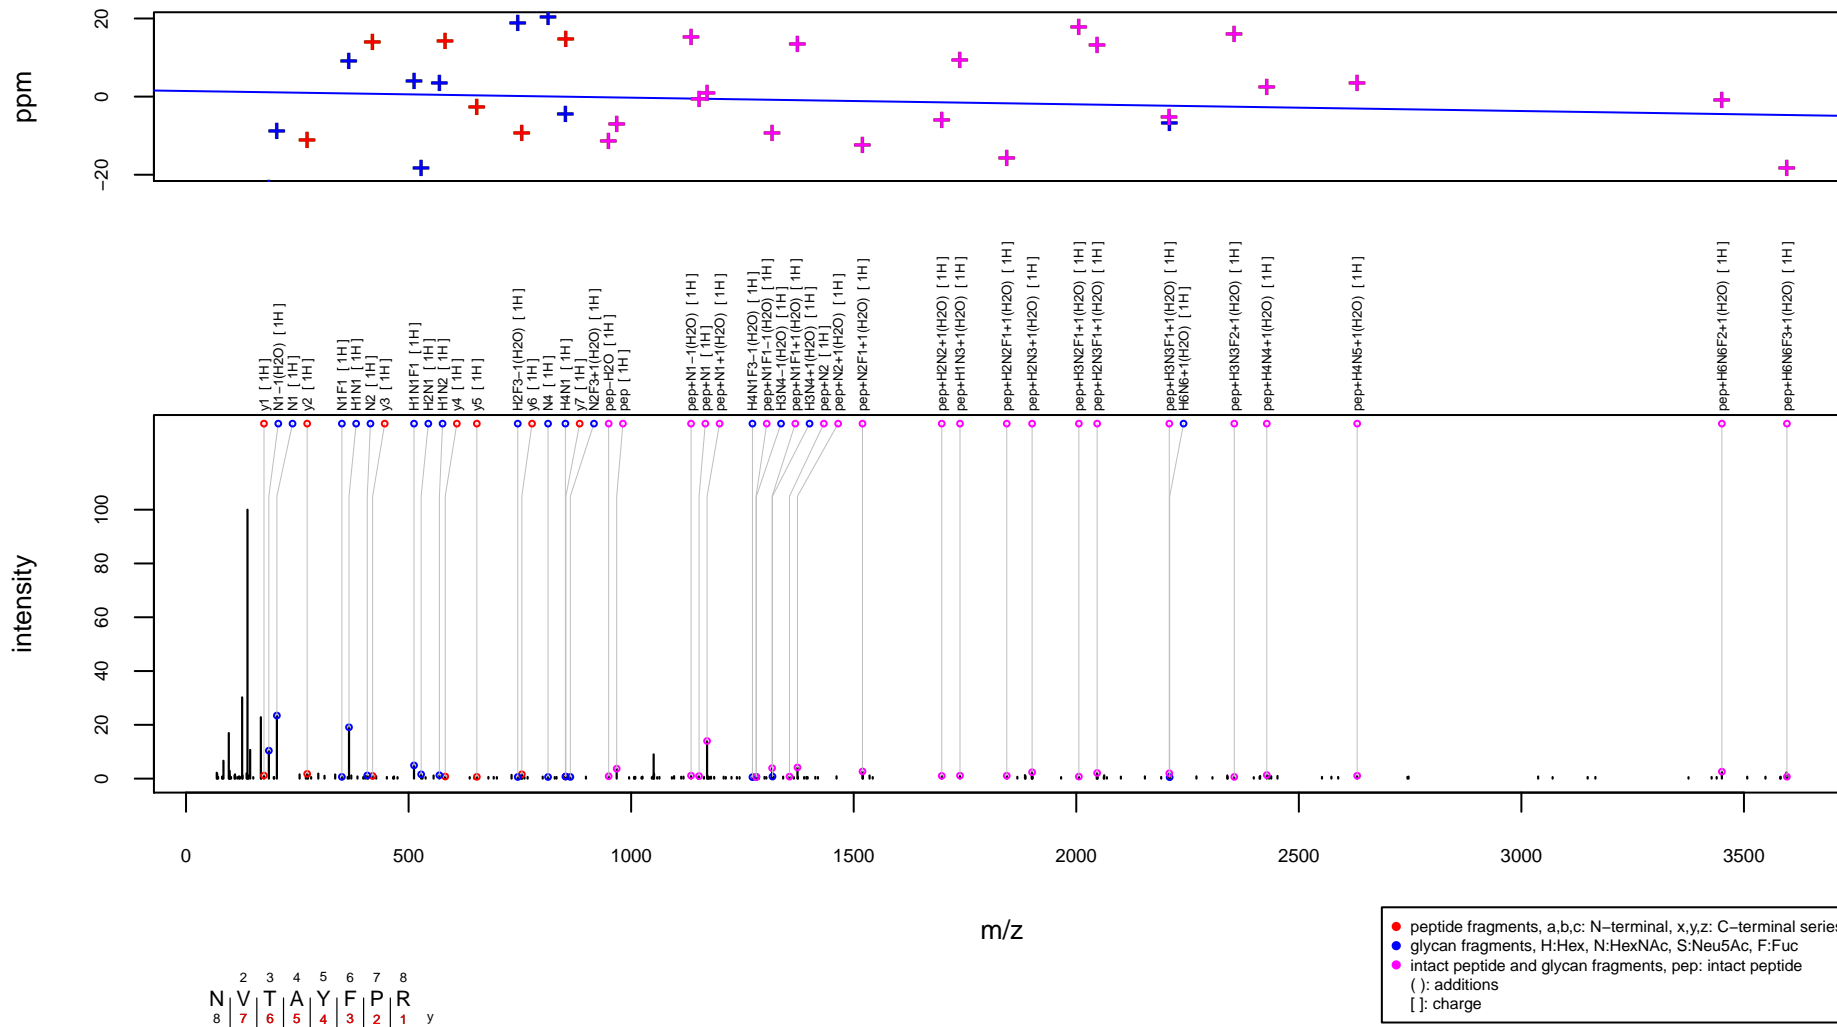

# m/z 1102.1216 charge 3 scan 0-0

Score= 70.91 , Hits= 52 , Explained Intensity= 0.38

Peptide: MGA\_HUMAN[1672,1679]:NVTA YFPR

Glycan: HNH(HN(HN)H)(N)HN(F)N, H6N6F1

Charge: 3H

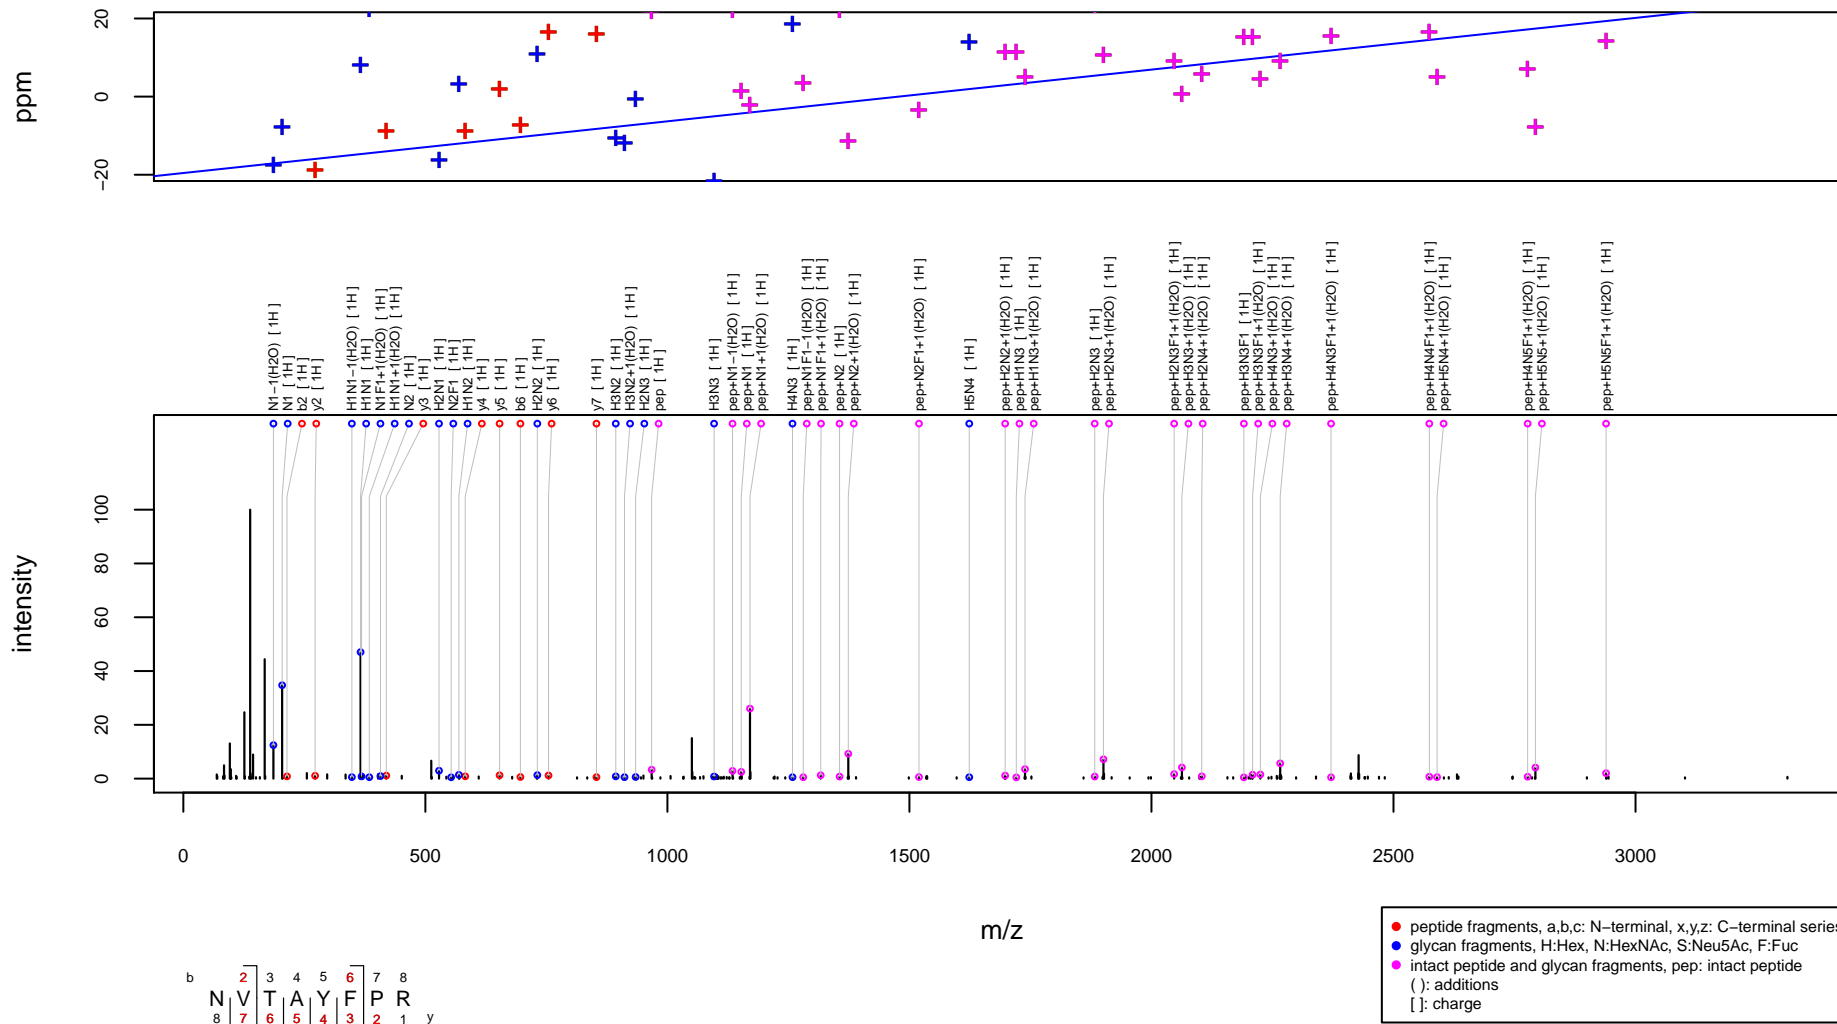

# m/z 1150.963 charge 4 scan 0-0

Score= 53.07 , Hits= 41 , Explained Intensity= 0.41

Peptide: LRP2\_HUMAN[285,305]:VCDGILDCP GRE DENNTSTGK

Glycan: FHNH(FHNH)(N)HN(F)N, H5N5F3

Charge: 4H

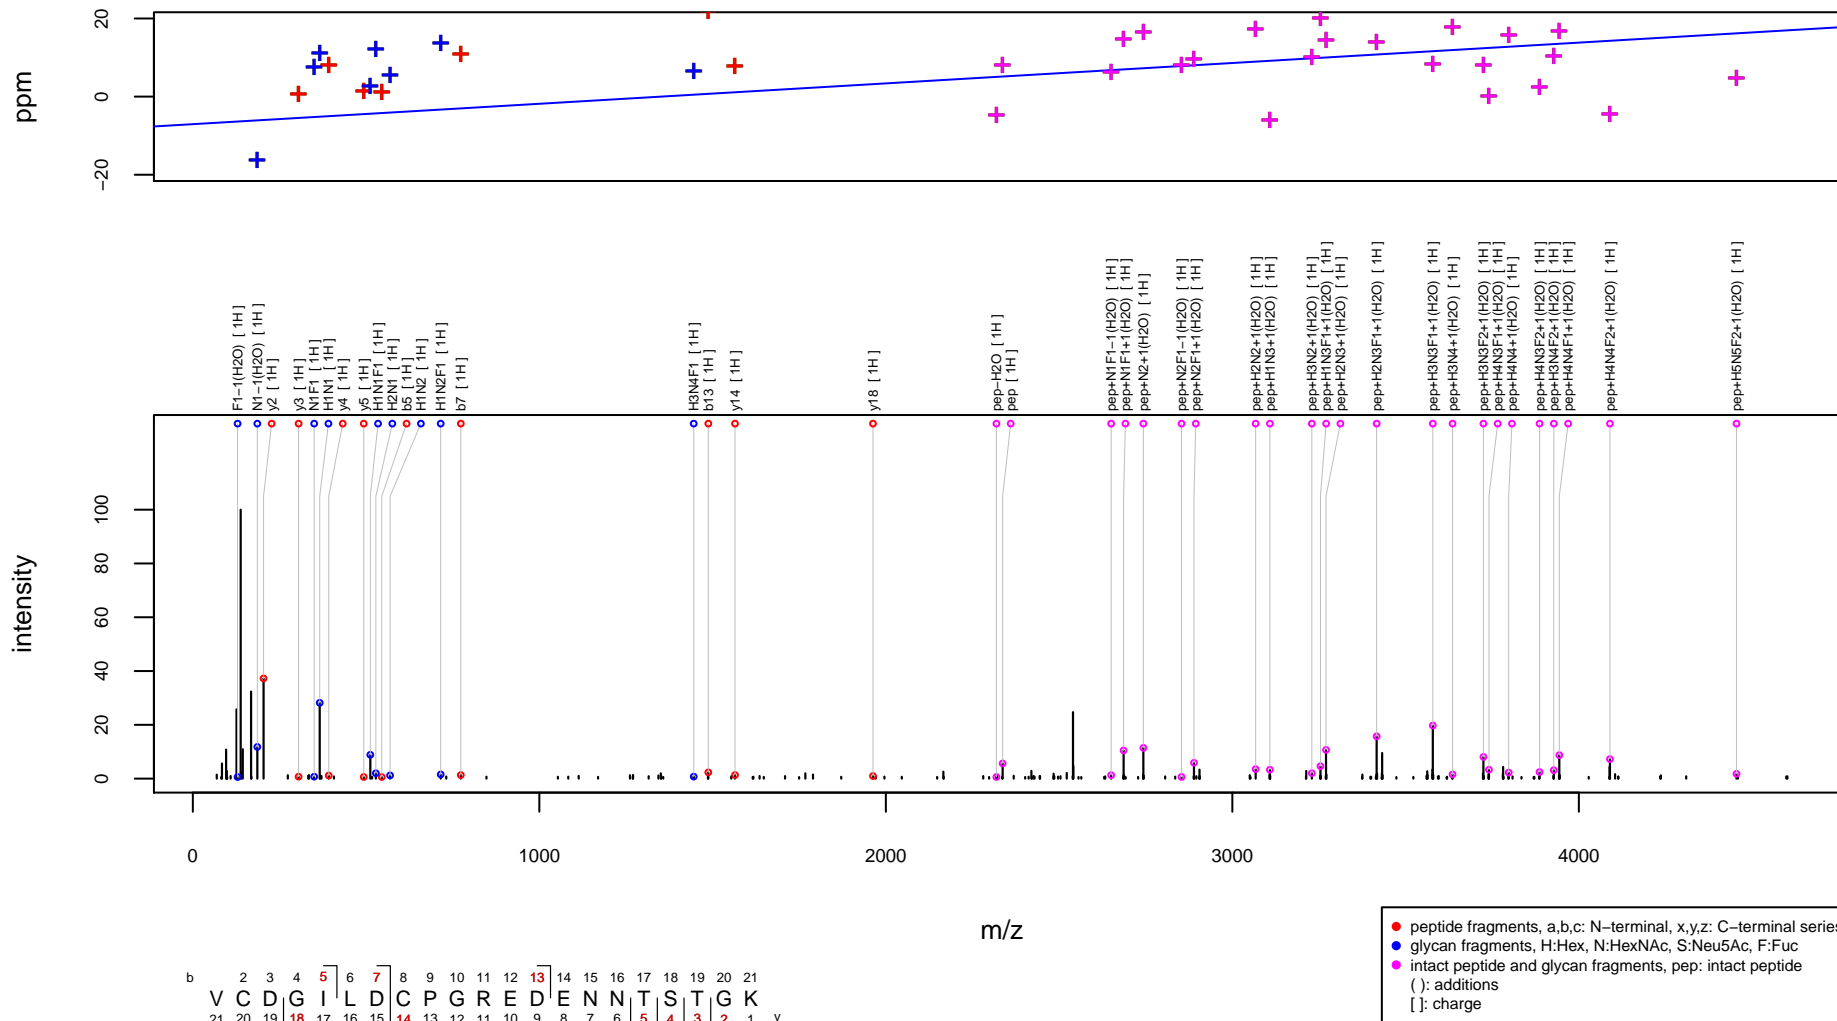

# m/z 1150.8015 charge 3 scan 0-0

Score= 52.09 , Hits= 49 , Explained Intensity= 0.41

Peptide: MGA\_HUMAN[1672,1679]:NVTAYFPR

Glycan: H6N6F2

Charge: 3H

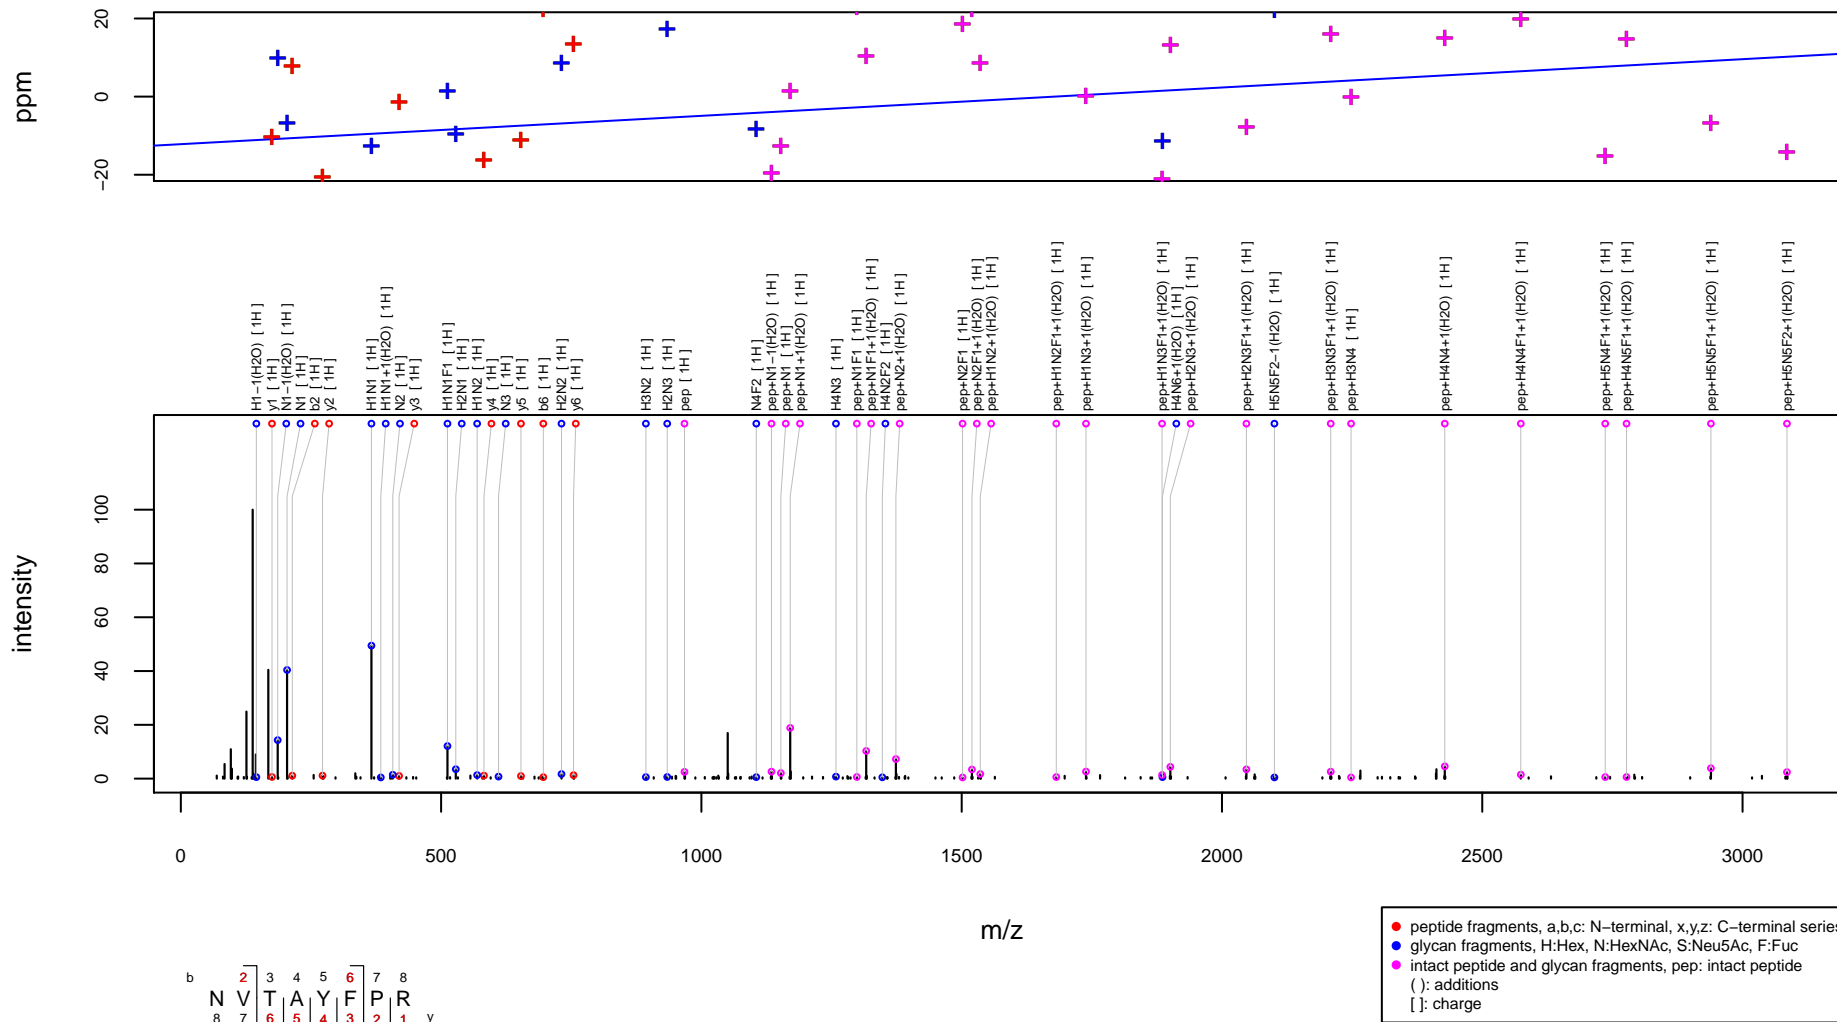

# m/z 1139.4739 charge 4 scan 0-0

Score= 36.24 , Hits= 27 , Explained Intensity= 0.35

Peptide: AMPN\_HUMAN[40,69]:NANSSPVASTTPSASATTNPASATTLQSK

Glycan: S2H3N3

Charge: 4H

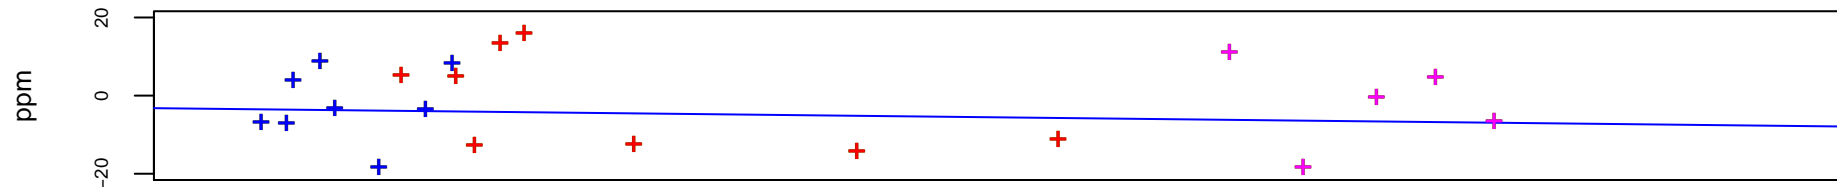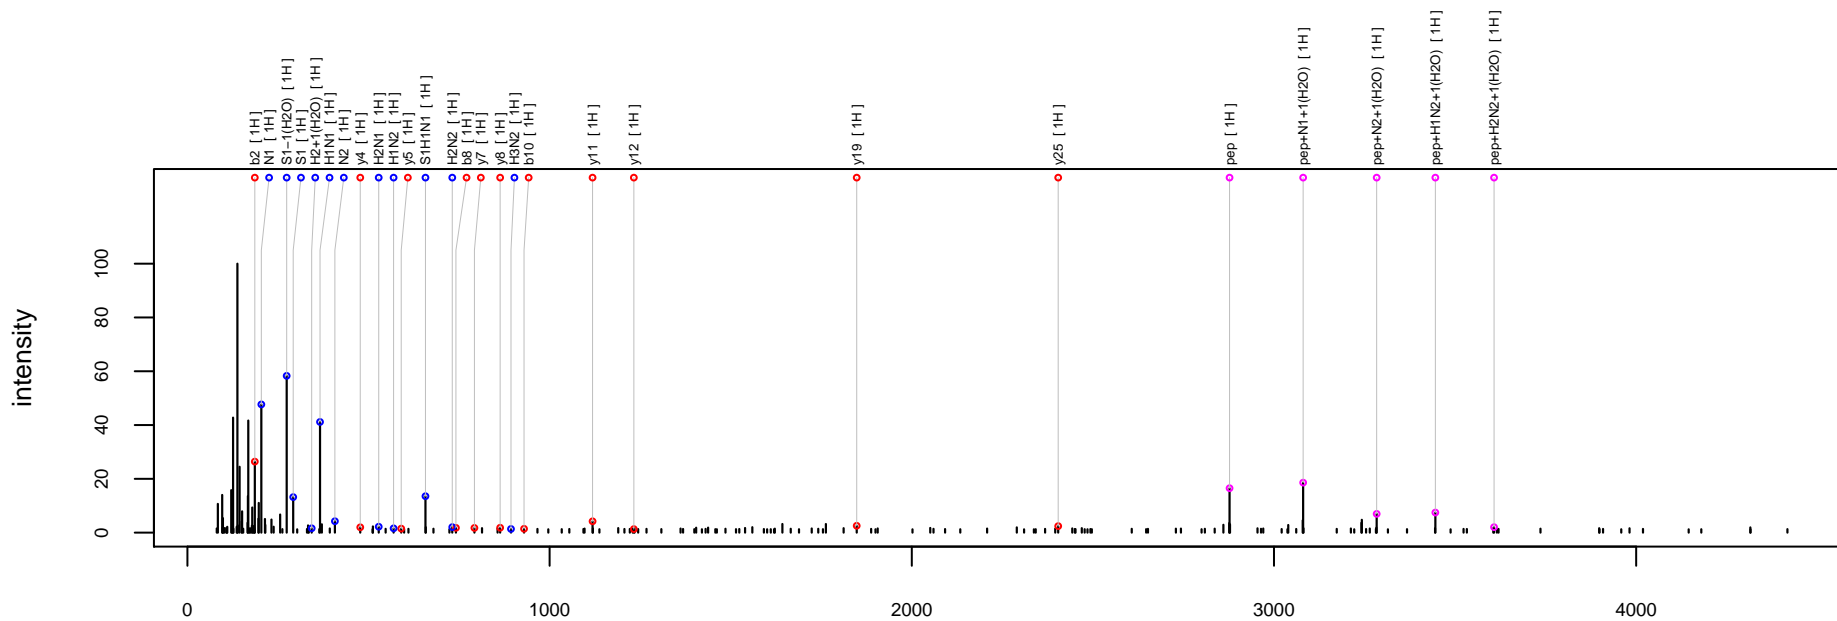

b 2 3 4 5 6 7 8 9 10 11 12 13 14 15 16 17 18 19 20 21 22 23 24 25 26 27 28 29 30  
 N A N S S P V A S T T P S A S A T T N P A S A T T L Q S K  
 30 29 28 27 26 25 24 23 22 21 20 19 18 17 16 15 14 13 12 11 10 9 8 7 6 5 4 3 2 1 y

● peptide fragments, a,b,c: N-terminal, x,y,z: C-terminal series  
 ● glycan fragments, H:Hex, N:HexNAc, S:Neu5Ac, F:Fuc  
 ● intact peptide and glycan fragments, pep: intact peptide  
 ( ): additions  
 [ ]: charge

# m/z 903.112 charge 4 scan 0-0

Score= 37.58 , Hits= 27 , Explained Intensity= 0.26

Peptide: HEMO\_HUMAN[181,193]:SWPAVGCSSALR

Glycan: SHNH(SHNH)HNN, S2H5N4

Charge: 4H

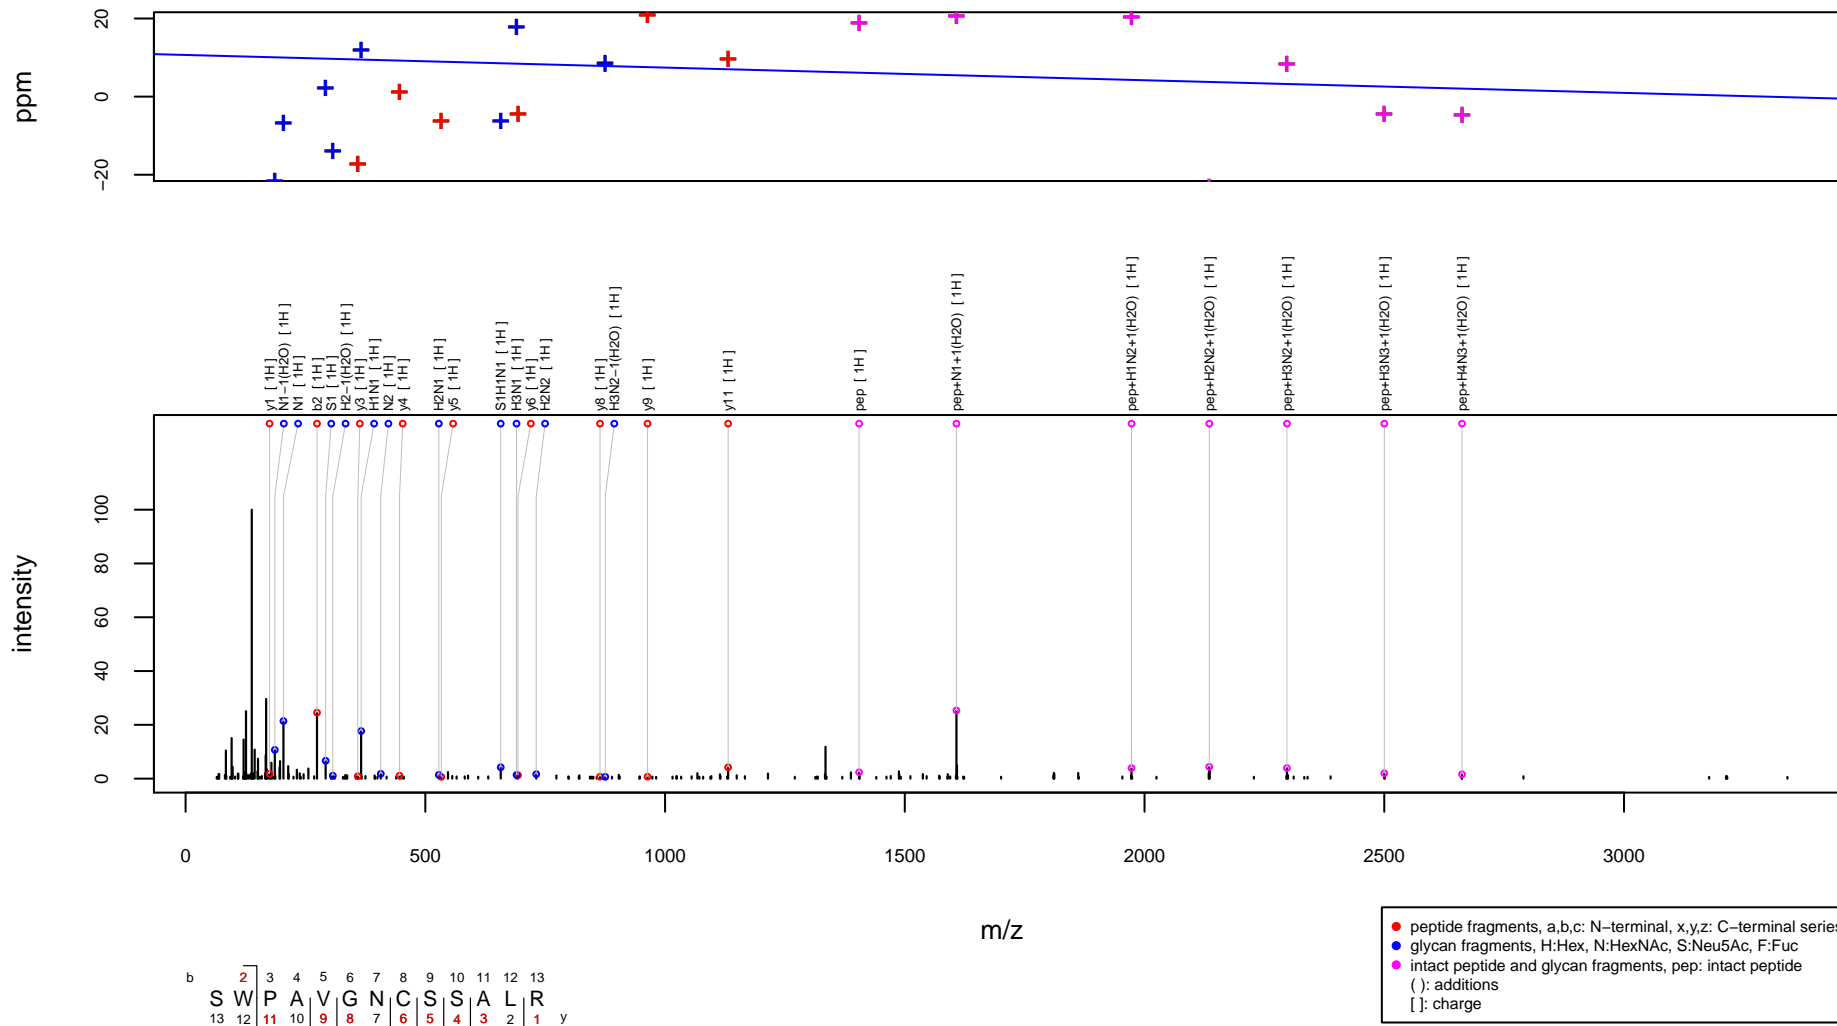

# m/z 976.406 charge 4 scan 0-0

Score= 38.99 , Hits= 42 , Explained Intensity= 0.31

Peptide: LG3BP\_HUMAN[542,554]:AAIPSAALDTNSK

Glycan: S1H6N6F1

Charge: 4H

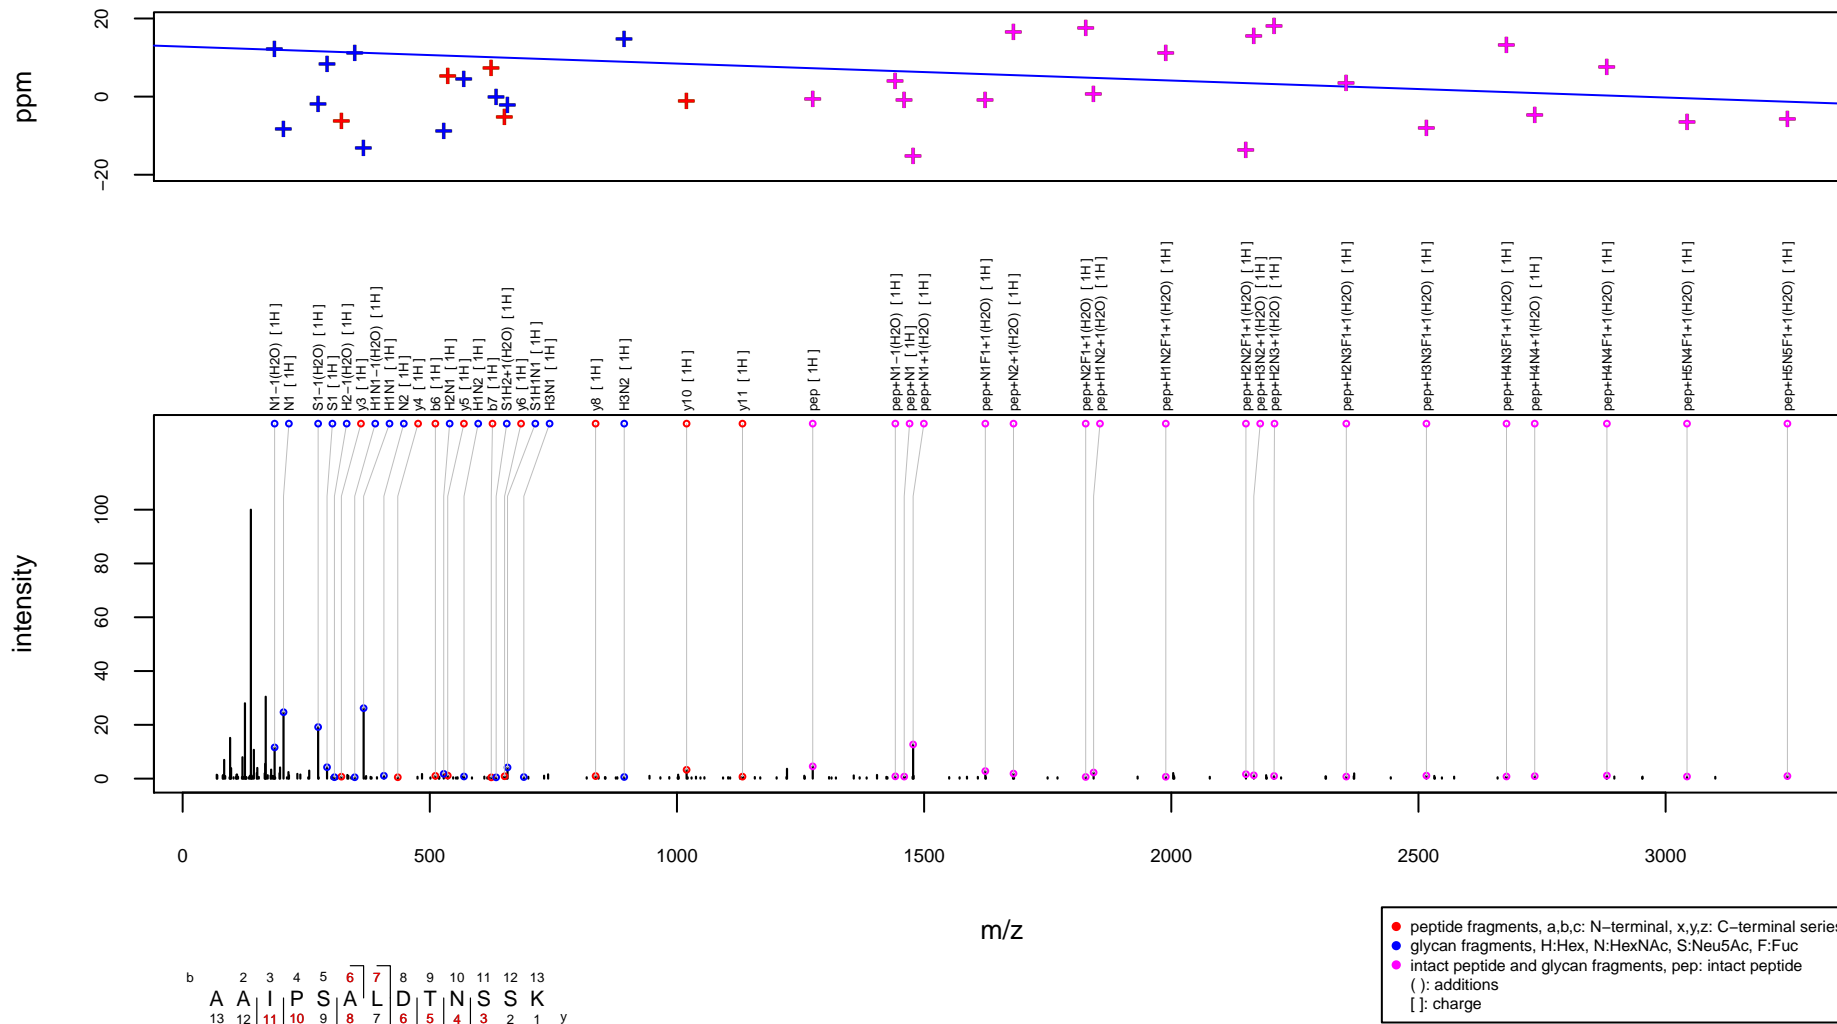



# m/z 1049.7739 charge 3 scan 0-0

Score= 55.34 , Hits= 38 , Explained Intensity= 0.4

Peptide: LG3BP\_HUMAN[542,554]:AAIPSA LDTNSSK

Glycan: SHNH(H(H)H)HNN, S1H6N3

Charge: 3H

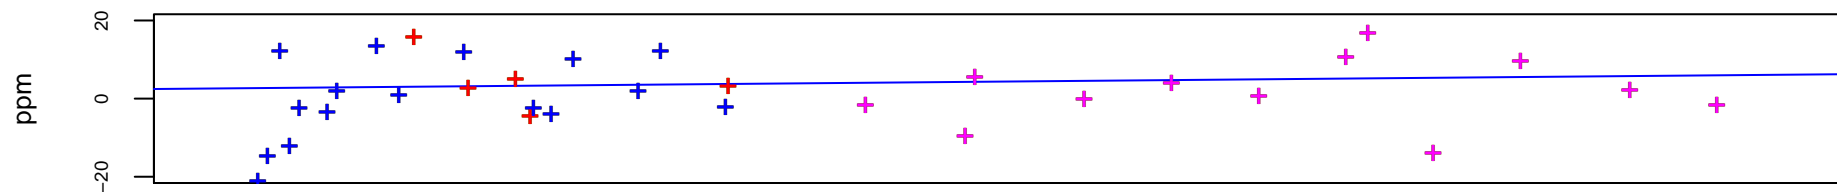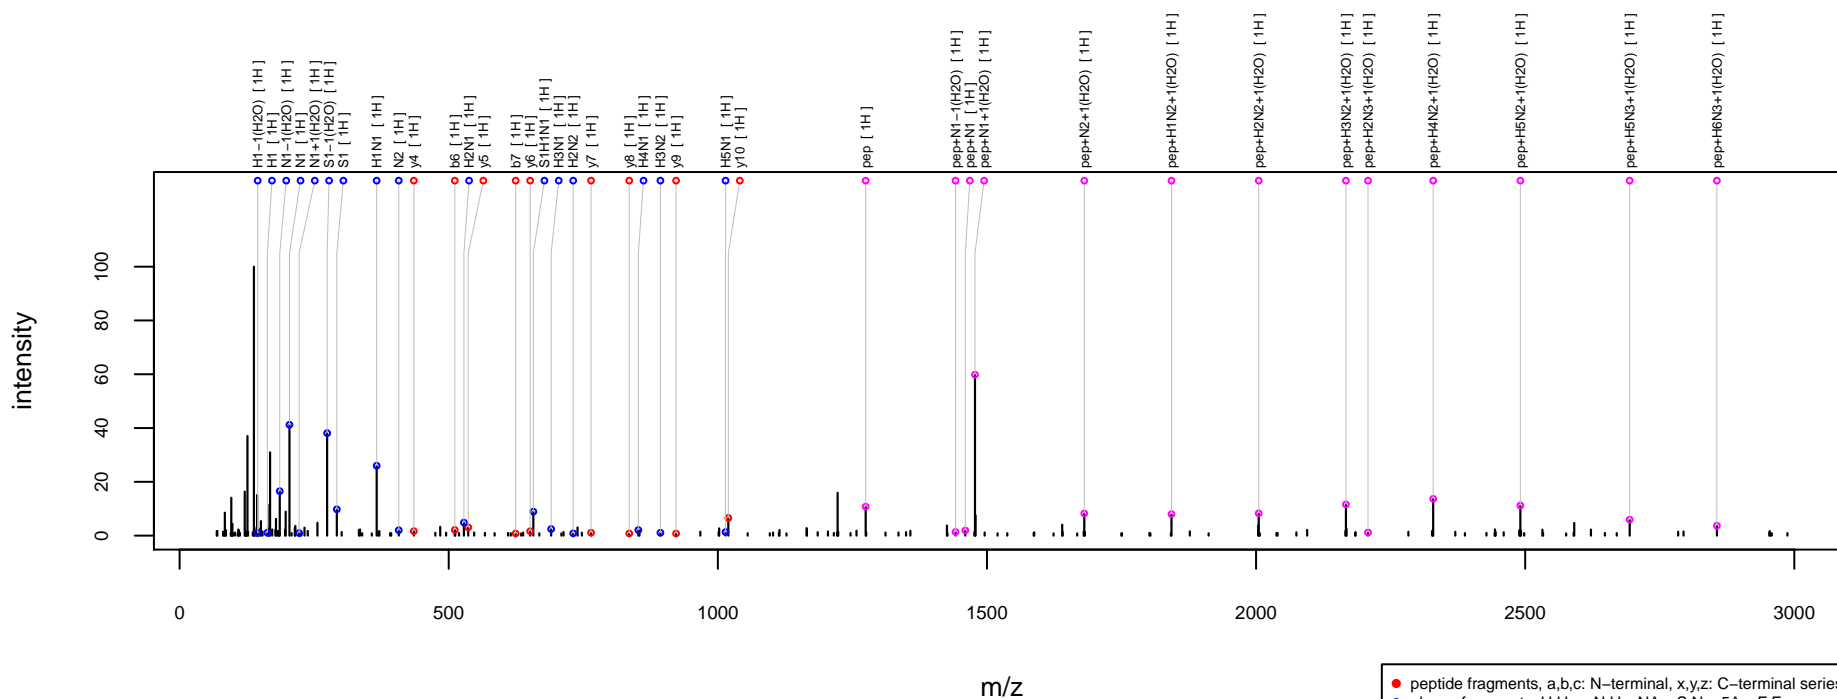

b    2 3 4 5 6 7 8 9 10 11 12 13  
 A A I P S A L D T N S S K  
 13 12 11 10 9 8 7 6 5 4 3 2 1 y

● peptide fragments, a,b,c: N-terminal, x,y,z: C-terminal series  
 ● glycan fragments, H:Hex, N:HexNAc, S:Neu5Ac, F:Fuc  
 ● intact peptide and glycan fragments, pep: intact peptide  
 ( ): additions  
 [ ]: charge

# m/z 1170.7365 charge 4 scan 0-0

Score= 27.03 , Hits= 20 , Explained Intensity= 0.15

Peptide: A1AG1\_HUMAN[58,81]:SVQEIQATFFYFTPKNKTEDTIFLR

Glycan: H6N4

Charge: 4H

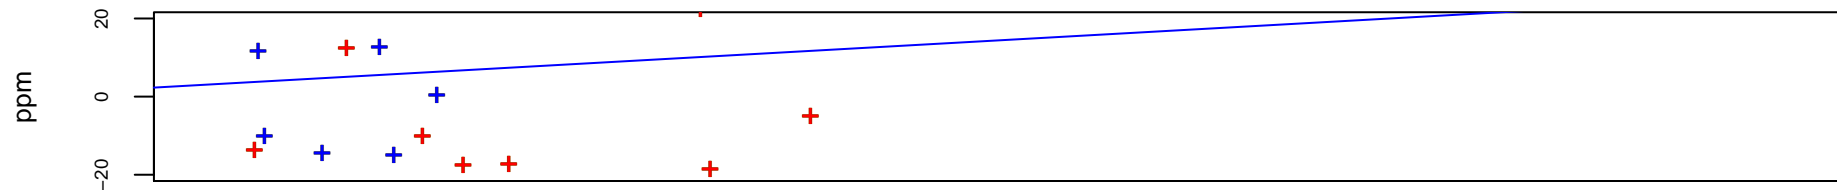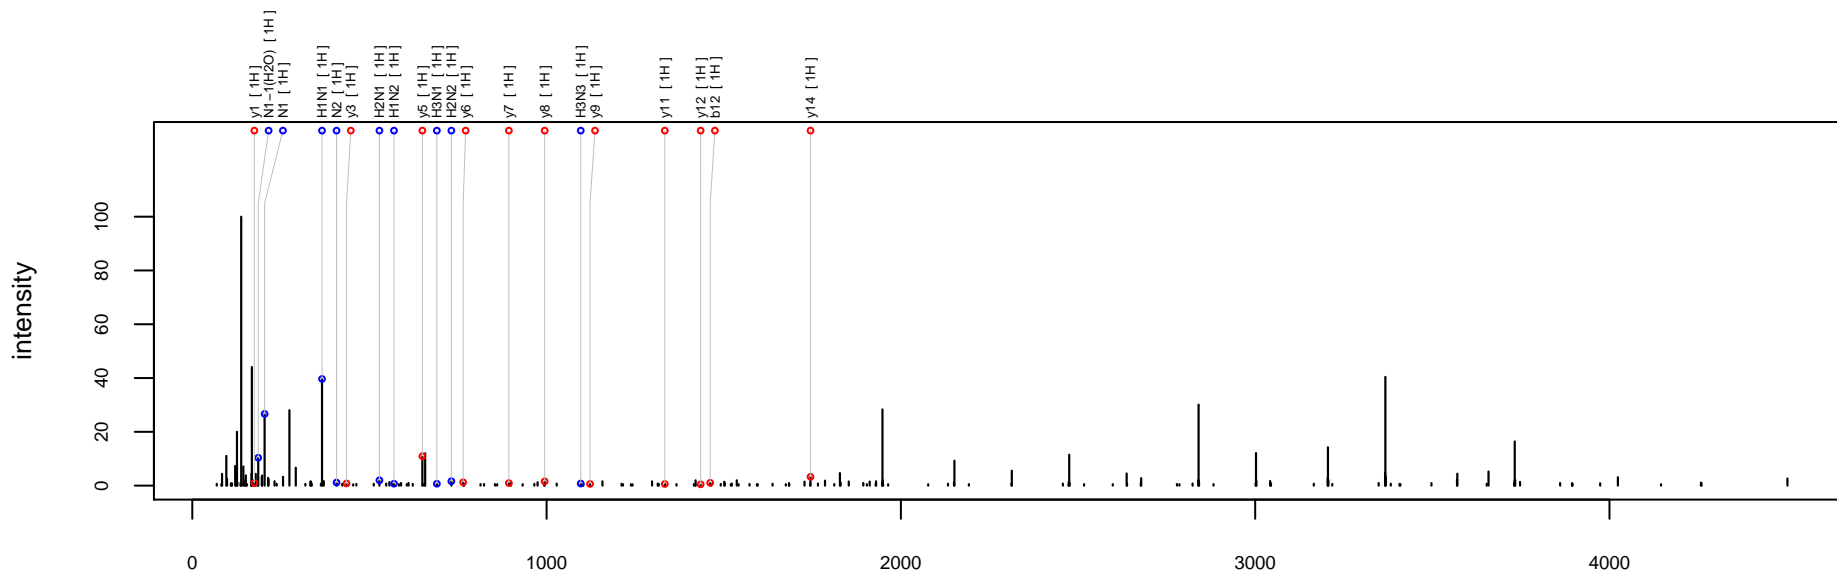

b 2 3 4 5 6 7 8 9 10 11 12 13 14 15 16 17 18 19 20 21 22 23 24  
 S V Q E I Q A T F F Y F T P N K T E D T I F L R  
 24 23 22 21 20 19 18 17 16 15 14 13 12 11 10 9 8 7 6 5 4 3 2 1 y

● peptide fragments, a,b,c: N-terminal, x,y,z: C-terminal series  
 ● glycan fragments, H:Hex, N:HexNAc, S:Neu5Ac, F:Fuc  
 ● intact peptide and glycan fragments, pep: intact peptide  
 ( ): additions  
 [ ]: charge

# m/z 917.7096 charge 3 scan 0-0

Score= 33.23 , Hits= 26 , Explained Intensity= 0.19

Peptide: FGFR3\_HUMAN[311,319]:TAGANTTDK

Glycan: S1H6N3

Charge: 3H

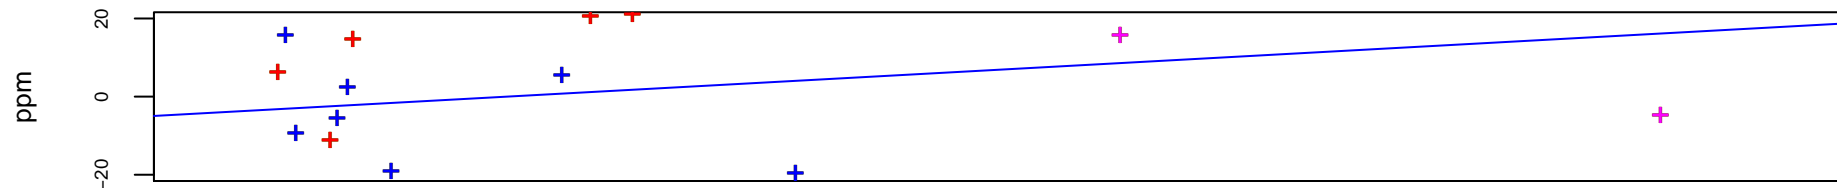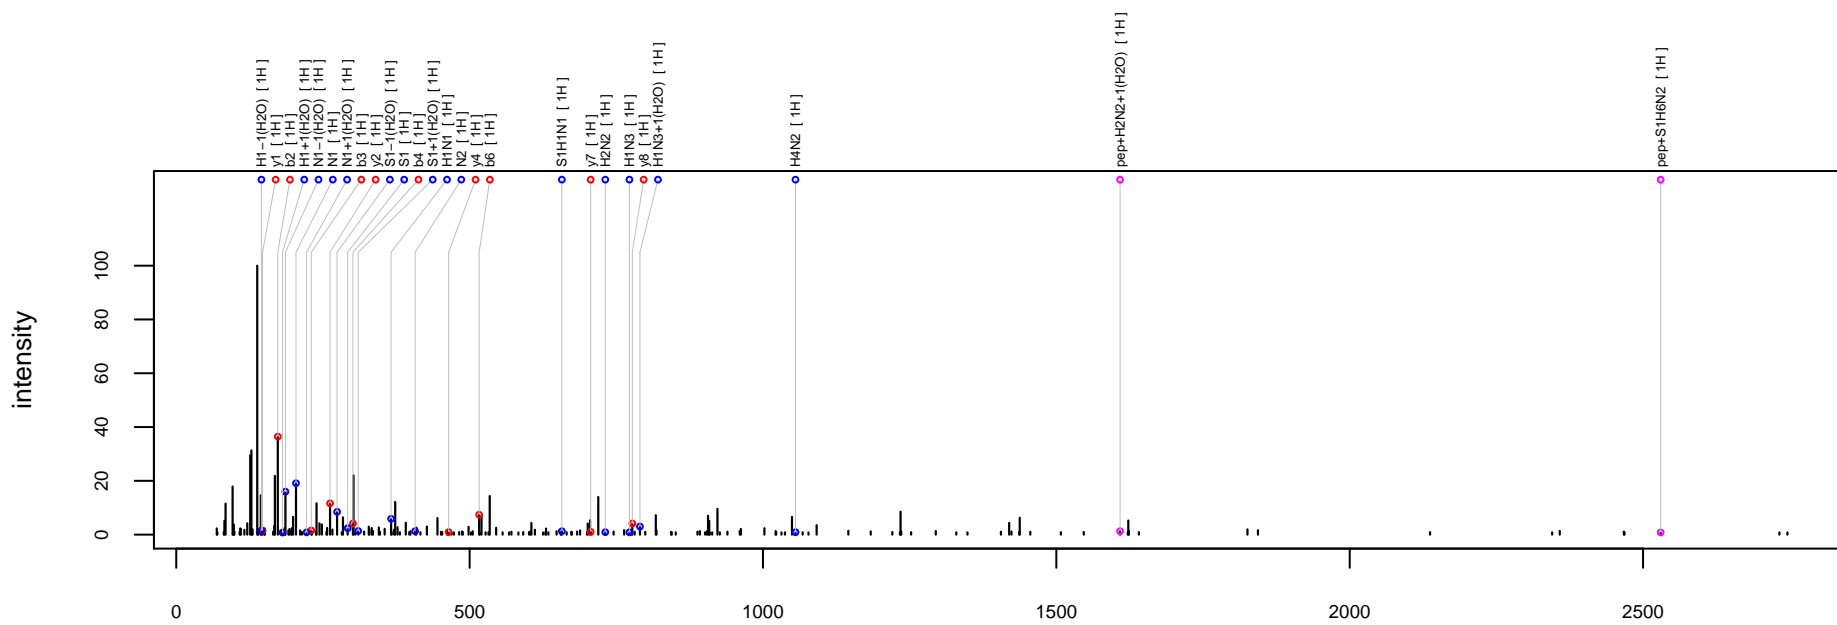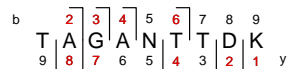

- peptide fragments, a,b,c: N-terminal, x,y,z: C-terminal series
- glycan fragments, H:Hex, N:HexNAc, S:Neu5Ac, F:Fuc
- intact peptide and glycan fragments, pep: intact peptide
- ( ): additions
- [ ]: charge

# m/z 898.7083 charge 3 scan 0-0

Score= 30.71 , Hits= 26 , Explained Intensity= 0.16

Peptide: FGFR3\_HUMAN[311,319]:TAGANTTDK

Glycan: S1H6N2F1

Charge: 3H

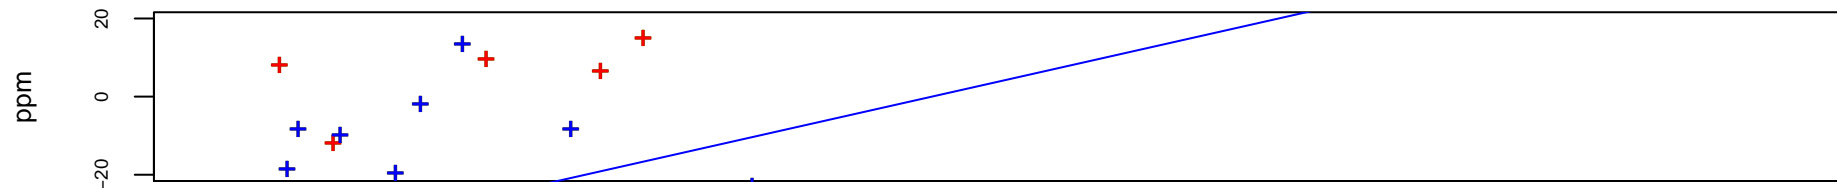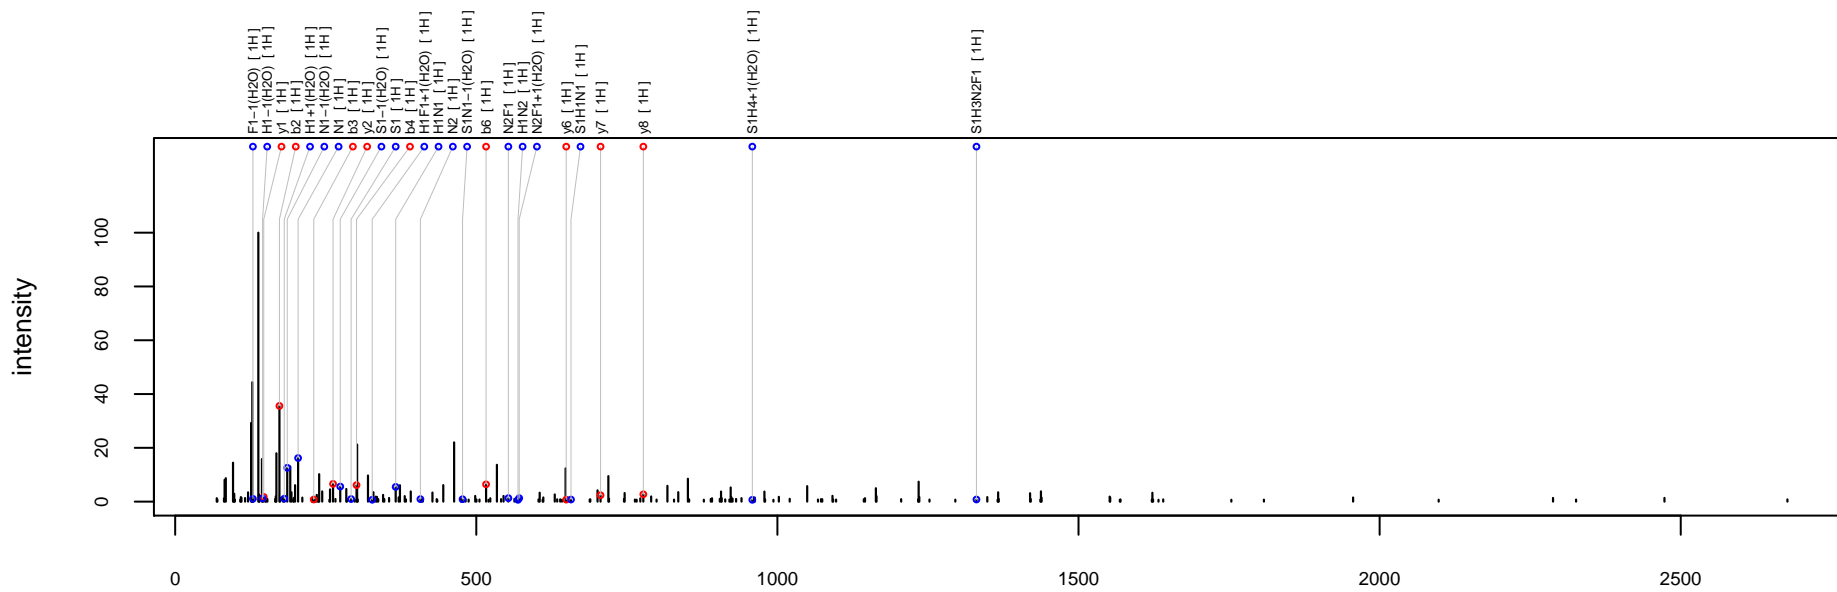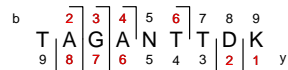

● peptide fragments, a,b,c: N-terminal, x,y,z: C-terminal series  
 ● glycan fragments, H:Hex, N:HexNAc, S:Neu5Ac, F:Fuc  
 ● intact peptide and glycan fragments, pep: intact peptide  
 ( ): additions  
 [ ]: charge

# m/z 918.1528 charge 4 scan 0-0

Score= 40.53 , Hits= 33 , Explained Intensity= 0.26

Peptide: DPEP1\_HUMAN[56,70]:ANLTTLAGHTHNIPK

Glycan: FHNH(HNH)(N)HN(F)N, H5N5F2

Charge: 4H

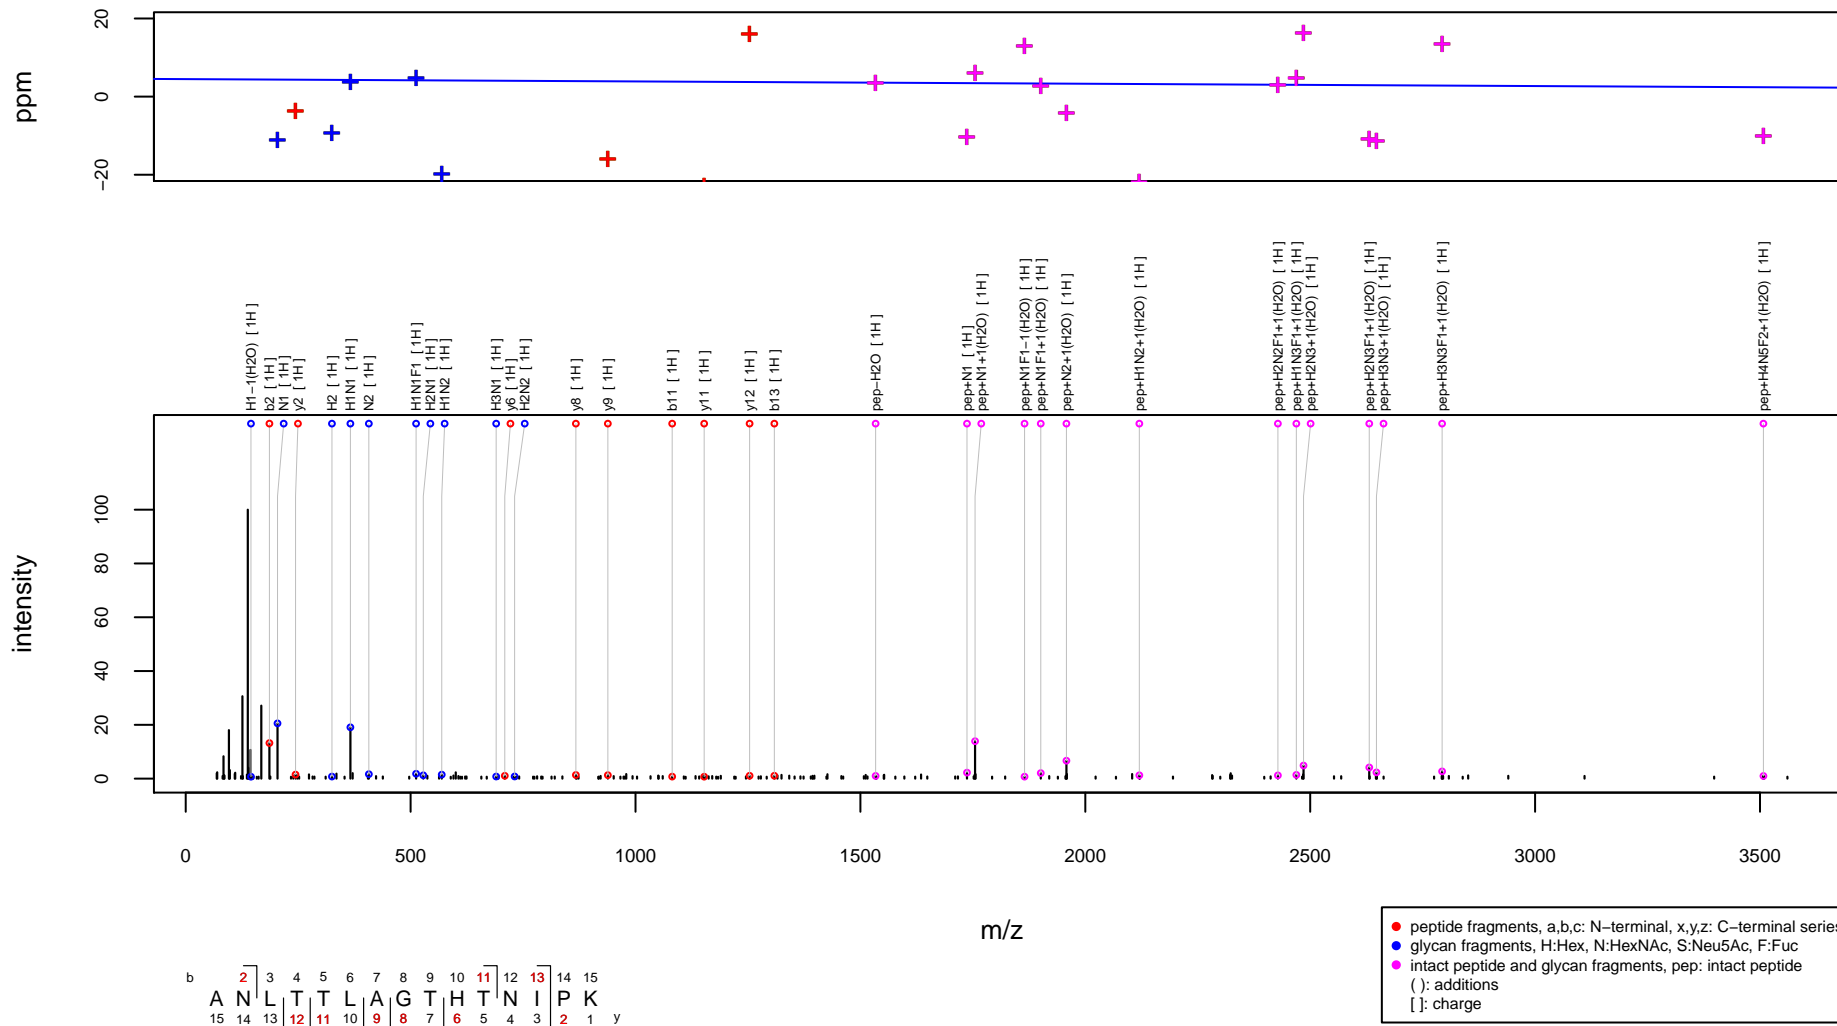

Supplement: supp_M114.040345_mcp.M114.040345-1.pdf [file supp_M114.040345_mcp.M114.040345-1.pdf]
